# Supplementary material for: Functional and Integrative Analysis of the Proteomic Profile of Radish Root under Pb Exposure
Source: Front Plant Sci. 2016 Dec 15;7:1871. doi: 10.3389/fpls.2016.01871 (PMC5156831; doi:10.3389/fpls.2016.01871)
Supplement: Table S4 — The quantitative proteins detected in the transcriptomic analysis of radish under Pb exposure. [file Table4.xlsx]

## Sheet: pb-1000-VS-CK_all_results_expre
	Table S4 The quantitative proteins detected in the transcriptomic analysis of radish under Pb exposure
Type	Protein ID	Description	Sameset	Pep_num	Score	Quantition(CK_all_results/pb-1000)	Sig	diff_Protein	GeneID&ProteinID	GeneID	log2(CK_all_results/pb-1000)	Fdr	diff_gene
	Unigene237	143 871 hypothetical protein ARALYDRAFT_471233 [Arabidopsis lyrata subsp. lyrata] >gi|297335684|gb|EFH66101.1| hypothetical protein ARALYDRAFT_471233 [Arabidopsis lyrata subsp. lyrata]		3	103	1.122			Unigene237	comp31116_c0_seq3	-0.266801	0.901154
	CL13524.Contig1	1 894 hypothetical protein ARALYDRAFT_911770 [Arabidopsis lyrata subsp. lyrata] >gi|297318567|gb|EFH48989.1| hypothetical protein ARALYDRAFT_911770 [Arabidopsis lyrata subsp. lyrata]		2	44	0.673			CL13524.Contig1	comp30384_c0_seq11	3.599	0.00781322
	CL10201.Contig1	130 2445 RecName: Full=Probable beta-D-xylosidase 7; Short=AtBXL7; Flags: Precursor >gi|18086336|gb|AAL57631.1| At1g78060/F28K19_32 [Arabidopsis thaliana]		5	147	1.26			CL10201.Contig1	comp18314_c0_seq1	-0.053447	1
	CL4333.Contig1	401 2209 minus strand hypothetical protein ARALYDRAFT_912451 [Arabidopsis lyrata subsp. lyrata] >gi|297314759|gb|EFH45182.1| hypothetical protein ARALYDRAFT_912451 [Arabidopsis lyrata subsp. lyrata]	CL4333.Contig2	11	395	1.007			CL4333.Contig1	comp21807_c0_seq1	0.404207	0.760319
	Unigene13940	1 2622 uncharacterized protein [Arabidopsis thaliana] >gi|332191928|gb|AEE30049.1| uncharacterized protein [Arabidopsis thaliana]		8	428	1.658	*	+	Unigene13940	comp24349_c0_seq1	-1.68229	0.101382
	Unigene22796	67 591 cobalt ion binding protein [Arabidopsis thaliana] >gi|30698791|ref|NP_849876.1| cobalt ion binding protein [Arabidopsis thaliana] >gi|332197065|gb|AEE35186.1| cobalt ion binding protein [Arabidopsis thaliana] >gi|332197066|gb|AEE35187.1| c		6	189	0.544	*	-	Unigene22796	comp14284_c0_seq1	0.151589	0.956499
	Unigene20420	1 2307 predicted protein [Arabidopsis lyrata subsp. lyrata] >gi|297316406|gb|EFH46829.1| predicted protein [Arabidopsis lyrata subsp. lyrata]		10	288	1.296	*	+	Unigene20420	comp22532_c0_seq1	1.8791	0.171833
	CL4576.Contig1	95 628 60S ribosomal protein L18a-2 [Arabidopsis thaliana] >gi|297826909|ref|XP_002881337.1| 60S ribosomal protein L18A [Arabidopsis lyrata subsp. lyrata] >gi|21431842|sp|P51418.2|R18A2_ARATH RecName: Full=60S ribosomal protein L18a-2 >gi|3128228	CL4576.Contig2 CL4576.Contig3	5	41	3.134			CL4576.Contig1	comp27889_c0_seq3	1.06948	0.277624
	Unigene21179	4 3552 hypothetical protein ARALYDRAFT_912310 [Arabidopsis lyrata subsp. lyrata] >gi|297314685|gb|EFH45108.1| hypothetical protein ARALYDRAFT_912310 [Arabidopsis lyrata subsp. lyrata]		2	68	0.902			Unigene21179	comp32215_c0_seq29	-31.9956	0.0489753
	CL654.Contig4	3 299 hypothetical protein ARALYDRAFT_903778 [Arabidopsis lyrata subsp. lyrata] >gi|297327768|gb|EFH58188.1| hypothetical protein ARALYDRAFT_903778 [Arabidopsis lyrata subsp. lyrata]		3	65	0.702			CL654.Contig4	comp29190_c1_seq4	0.714303	0.707192
	CL5344.Contig2	228 575 minus strand heavy-metal-associated domain-containing protein [Arabidopsis thaliana] >gi|332640685|gb|AEE74206.1| heavy-metal-associated domain-containing protein [Arabidopsis thaliana]	CL13946.Contig1 Unigene28049	2	102	1.137			CL5344.Contig2	comp29320_c2_seq14	-0.021859	1
	CL4320.Contig2	125 3085 minus strand U5 small nuclear ribonucleoprotein component [Arabidopsis thaliana] >gi|30679607|ref|NP_849600.1| U5 small nuclear ribonucleoprotein component [Arabidopsis thaliana] >gi|8844127|gb|AAF80219.1|AC025290_8 Contains similarity		6	246	1.131			CL4320.Contig2	comp31626_c0_seq2	0.0806827	1
	Unigene6789	62 1594 UBX domain-containing protein [Arabidopsis lyrata subsp. lyrata] >gi|297325870|gb|EFH56290.1| UBX domain-containing protein [Arabidopsis lyrata subsp. lyrata]		3	88	1.02			Unigene6789	comp34063_c0_seq1	-0.0554076	1
	CL3624.Contig1	52 297 minus strand 40S ribosomal protein S19-3 [Arabidopsis thaliana] >gi|297793669|ref|XP_002864719.1| 40S ribosomal protein S19 [Arabidopsis lyrata subsp. lyrata] >gi|27923837|sp|Q9FNP8.1|RS193_ARATH RecName: Full=40S ribosomal protein S19-3		5	148	0.605	*	-	CL3624.Contig1	comp55477_c0_seq1	-32.1817	0.0251893
	Unigene97	219 662 minus strand TCP-1/cpn60 chaperonin family protein [Arabidopsis thaliana] >gi|332641585|gb|AEE75106.1| TCP-1/cpn60 chaperonin family protein [Arabidopsis thaliana]		5	254	0.896			Unigene97	comp31773_c0_seq1	0.737375	0.467855
	CL13891.Contig2	70 1155 farnesyl diphosphate synthase 1 [Arabidopsis thaliana] >gi|21431776|sp|Q09152.2|FPPS1_ARATH RecName: Full=Farnesyl pyrophosphate synthase 1, mitochondrial; Short=FPP synthase 1; Short=FPS 1; AltName: Full=(2E,6E)-farnesyl diphosphate synt		4	95	1.894			CL13891.Contig2	comp29797_c0_seq1	0.478654	0.685954
	Unigene16353	325 1131 hypothetical protein ARALYDRAFT_477531 [Arabidopsis lyrata subsp. lyrata] >gi|297330183|gb|EFH60602.1| hypothetical protein ARALYDRAFT_477531 [Arabidopsis lyrata subsp. lyrata]		2	115	0.84			Unigene16353	comp27828_c0_seq1	2.33596	0.0138961
	CL2847.Contig1	92 919 minus strand gamma carbonic anhydrase 2 [Arabidopsis thaliana] >gi|75169075|sp|Q9C6B3.1|GCA2_ARATH RecName: Full=Gamma carbonic anhydrase 2, mitochondrial; Short=AtCA2; Short=GAMMA CA2; AltName: Full=Transcription factor APFI; Flags: Prec		5	248	0.562	*	-	CL2847.Contig1	comp28371_c0_seq2	34.339	1.55e-05	+
	Unigene16673	80 1585 gamma-aminobutyrate transaminase subunit precursor [Arabidopsis lyrata subsp. lyrata] >gi|297329188|gb|EFH59607.1| gamma-aminobutyrate transaminase subunit precursor [Arabidopsis lyrata subsp. lyrata]		14	298	1.11	*		Unigene16673	comp26676_c0_seq1	4.11357	0.00135711
	CL1516.Contig1	99 944 minus strand non-intrinsic ABC protein 4 [Arabidopsis thaliana] >gi|75116803|sp|Q681Q7.1|Y1390_ARATH RecName: Full=Uncharacterized protein At1g03900 >gi|332189509|gb|AEE27630.1| non-intrinsic ABC protein 4 [Arabidopsis thaliana]		2	46	1.319			CL1516.Contig1	comp27795_c0_seq2	-0.198774	0.976035
	Unigene16549	3 2123 serine-type peptidase [Arabidopsis lyrata subsp. lyrata] >gi|297327957|gb|EFH58377.1| serine-type peptidase [Arabidopsis lyrata subsp. lyrata]		3	97	0.768			Unigene16549	comp31399_c0_seq1	-1.12317	0.268423
	Unigene8068	92 232 hypothetical protein ARALYDRAFT_471063 [Arabidopsis lyrata subsp. lyrata] >gi|297335604|gb|EFH66021.1| hypothetical protein ARALYDRAFT_471063 [Arabidopsis lyrata subsp. lyrata]		4	163	1.558			Unigene8068	comp30540_c0_seq11	-0.670221	0.663659
	CL14002.Contig1	102 629 minus strand hypothetical protein ARALYDRAFT_477747 [Arabidopsis lyrata subsp. lyrata] >gi|297330310|gb|EFH60729.1| hypothetical protein ARALYDRAFT_477747 [Arabidopsis lyrata subsp. lyrata]	CL14002.Contig2	3	64	0.518			CL14002.Contig1	comp23350_c0_seq2	-0.645373	0.627531
	CL6151.Contig2	13 543 hypothetical protein ARALYDRAFT_481517 [Arabidopsis lyrata subsp. lyrata] >gi|297324816|gb|EFH55236.1| hypothetical protein ARALYDRAFT_481517 [Arabidopsis lyrata subsp. lyrata]		5	107	2.037	*	+	CL6151.Contig2	comp18415_c0_seq2	1.79164	0.356935
	CL2975.Contig1	86 1384 hypothetical protein ARALYDRAFT_489045 [Arabidopsis lyrata subsp. lyrata] >gi|297317818|gb|EFH48240.1| hypothetical protein ARALYDRAFT_489045 [Arabidopsis lyrata subsp. lyrata]		3	104	0.924			CL2975.Contig1	comp30826_c0_seq2	-0.836068	0.549502
	CL5731.Contig2	94 993 galactose oxidase/kelch repeat-containing protein [Arabidopsis thaliana] >gi|11692832|gb|AAG40019.1|AF324668_1 MLP3.17 [Arabidopsis thaliana] >gi|14517448|gb|AAK62614.1| AT3g07720/F17A17_6 [Arabidopsis thaliana] >gi|23507767|gb|AAN38687.1|	CL5731.Contig3	7	117	0.636	*	-	CL5731.Contig2	comp31814_c0_seq6	-1.08114	0.22887
	CL6335.Contig2	1 1152 minus strand IAA-amino acid hydrolase 2 [Brassica rapa]		6	213	0.718			CL6335.Contig2	comp23279_c0_seq1	-1.27547	0.2173
	CL8155.Contig1	113 2572 uncharacterized protein [Arabidopsis thaliana] >gi|332658312|gb|AEE83712.1| uncharacterized protein [Arabidopsis thaliana]		2	93	0.58			CL8155.Contig1	comp30645_c0_seq1	0.094157	1
	CL635.Contig1	726 1844 minus strand hypothetical protein ARALYDRAFT_494462 [Arabidopsis lyrata subsp. lyrata] >gi|297309356|gb|EFH39780.1| hypothetical protein ARALYDRAFT_494462 [Arabidopsis lyrata subsp. lyrata]	Unigene29253	2	31	1.903			CL635.Contig1	comp38025_c0_seq1	0.0546748	1
	CL1449.Contig1	194 1402 binding protein [Arabidopsis lyrata subsp. lyrata] >gi|297323811|gb|EFH54232.1| binding protein [Arabidopsis lyrata subsp. lyrata]	CL1449.Contig2	3	67	1.362			CL1449.Contig1	comp22241_c0_seq1	-2.79332	0.353433
	CL14662.Contig1	34 1056 minus strand basic glucanase [Brassica juncea]		25	754	1.003			CL14662.Contig1	comp26226_c0_seq2	-5.20836	0.000671651	-
	CL5706.Contig1	47 2266 minus strand Transketolase [Arabidopsis thaliana] >gi|332646582|gb|AEE80103.1| Transketolase [Arabidopsis thaliana]		2	1069	1.87	*	+	CL5706.Contig1	comp31218_c0_seq2	-0.649543	0.536137
	Unigene16593	1 1242 minus strand hypothetical protein ARALYDRAFT_476563 [Arabidopsis lyrata subsp. lyrata] >gi|297334810|gb|EFH65228.1| hypothetical protein ARALYDRAFT_476563 [Arabidopsis lyrata subsp. lyrata]		3	113	1.183			Unigene16593	comp29822_c0_seq1	-0.434363	0.770002
	Unigene23950	1 1032 GHMP kinase family protein [Arabidopsis lyrata subsp. lyrata] >gi|297336798|gb|EFH67215.1| GHMP kinase family protein [Arabidopsis lyrata subsp. lyrata]		3	98	0.809	*	-	Unigene23950	comp30037_c0_seq2	-34.8498	1.52e-06	-
	Unigene24935	44 784 minus strand aquaporin TIP2-1 [Arabidopsis thaliana] >gi|32363275|sp|Q41951.2|TIP21_ARATH RecName: Full=Aquaporin TIP2-1; AltName: Full=Delta-tonoplast intrinsic protein; Short=Delta-TIP; AltName: Full=Tonoplast intrinsic protein 2-1; Sho	Unigene24936	5	213	0.794			Unigene24935	comp24153_c0_seq1	-0.164382	0.948145
	CL1389.Contig1	143 1093 minus strand peroxidase 64 [Arabidopsis lyrata subsp. lyrata] >gi|297311397|gb|EFH41821.1| peroxidase 64 [Arabidopsis lyrata subsp. lyrata]		5	185	0.512			CL1389.Contig1	comp16971_c0_seq1	1.86203	0.0959985
	CL3263.Contig1	188 1084 dicarboxylate/tricarboxylate carrier [Arabidopsis lyrata subsp. lyrata] >gi|297319799|gb|EFH50221.1| dicarboxylate/tricarboxylate carrier [Arabidopsis lyrata subsp. lyrata]	CL3263.Contig2	7	258	1.098			CL3263.Contig1	comp30047_c0_seq4	0.462129	0.707192
	Unigene29764	2 724 minus strand hypothetical protein ARALYDRAFT_485973 [Arabidopsis lyrata subsp. lyrata] >gi|297322142|gb|EFH52563.1| hypothetical protein ARALYDRAFT_485973 [Arabidopsis lyrata subsp. lyrata]		14	397	1.715	*	+	Unigene29764	comp136334_c0_seq1	1.79164	0.643979
	Unigene18624	2 583 hypothetical protein ARALYDRAFT_323273 [Arabidopsis lyrata subsp. lyrata] >gi|297321614|gb|EFH52035.1| hypothetical protein ARALYDRAFT_323273 [Arabidopsis lyrata subsp. lyrata]		2	58	1.2			Unigene18624	comp25880_c0_seq1	31.8213	0.0686039
	CL2652.Contig2	110 1036 minus strand mitochondrial import receptor subunit TOM40-1 [Arabidopsis thaliana] >gi|13632086|sp|Q9LHE5.3|TO401_ARATH RecName: Full=Mitochondrial import receptor subunit TOM40 homolog 1; AltName: Full=Translocase of outer membrane 40 k		6	160	0.937			CL2652.Contig2	comp27328_c0_seq2	-0.321787	0.862489
	Unigene6860	280 753 At1g47960/T2J15_13 [Arabidopsis thaliana] >gi|15810209|gb|AAL07005.1| At1g47960/T2J15_13 [Arabidopsis thaliana] >gi|19699120|gb|AAL90926.1| At1g47960/T2J15_13 [Arabidopsis thaliana]		3	159	0.563	*	-	Unigene6860	comp21578_c0_seq1	0.569248	0.903577
	CL5897.Contig1	1 1203 minus strand S9 Tyrosyl aminopeptidase [Raphanus sativus]		2	70	1.423			CL5897.Contig1	comp31932_c0_seq4	-34.8597	1.52e-06	-
	Unigene19228	73 1326 minus strand hydroxyproline-rich glycoprotein family protein [Arabidopsis lyrata subsp. lyrata] >gi|297313379|gb|EFH43802.1| hydroxyproline-rich glycoprotein family protein [Arabidopsis lyrata subsp. lyrata]		3	142	0.981			Unigene19228	comp18599_c1_seq1	-1.53029	0.726169
	CL83.Contig1	553 690 minus strand ubiquitin-conjugating enzyme E2 variant 1D [Arabidopsis thaliana] >gi|332645439|gb|AEE78960.1| ubiquitin-conjugating enzyme E2 variant 1D [Arabidopsis thaliana]		2	42	1.208	*	+	CL83.Contig1	comp29637_c0_seq5	0.824103	0.44502
	CL2410.Contig1	176 874 minus strand hypothetical protein ARALYDRAFT_485817 [Arabidopsis lyrata subsp. lyrata] >gi|297322084|gb|EFH52505.1| hypothetical protein ARALYDRAFT_485817 [Arabidopsis lyrata subsp. lyrata]		2	66	0.933			CL2410.Contig1	comp42340_c0_seq1	-4.14696	0.000705527	-
	CL1809.Contig16	87 665 minus strand uncharacterized protein [Arabidopsis thaliana] >gi|332191687|gb|AEE29808.1| uncharacterized protein [Arabidopsis thaliana]		4	145	0.434	*	-	CL1809.Contig16	comp28013_c0_seq25	1.52102	0.105366
	CL7216.Contig1	63 1673 minus strand putative papillar cell-specific calnexin [Brassica napus]	CL7216.Contig2	5	591	1.226			CL7216.Contig1	comp13357_c0_seq1	-0.123495	1
	Unigene28700	63 1526 DNA-binding protein HMR1-like protein [Arabidopsis thaliana] >gi|30387569|gb|AAP31950.1| At3g18035 [Arabidopsis thaliana] >gi|332642516|gb|AEE76037.1| DNA-binding protein HMR1-like protein [Arabidopsis thaliana]		9	684	0.945			Unigene28700	comp31577_c0_seq1	1.60161	0.0686039
	CL12178.Contig1	83 856 protein-l-isoaspartate O-methyltransferase [Arabidopsis lyrata subsp. lyrata] >gi|297323445|gb|EFH53866.1| protein-l-isoaspartate O-methyltransferase [Arabidopsis lyrata subsp. lyrata]	CL12178.Contig2	17	619	0.69	*	-	CL12178.Contig1	comp23494_c0_seq1	0.416131	0.760628
	CL10559.Contig2	149 769 ribosomal protein S19 [Arabidopsis thaliana] >gi|459422|emb|CAA54965.1| mitochondrial ribosomal protein S19, nuclear encoded [Arabidopsis thaliana]	CL10559.Contig3 CL10559.Contig4	3	64	0.89			CL10559.Contig2	comp74826_c0_seq1	1.79164	0.643979
	CL7863.Contig1	1 606 hypothetical protein ARALYDRAFT_478641 [Arabidopsis lyrata subsp. lyrata] >gi|297330766|gb|EFH61185.1| hypothetical protein ARALYDRAFT_478641 [Arabidopsis lyrata subsp. lyrata]		8	295	0.635			CL7863.Contig1	comp29403_c0_seq5	-32.1715	0.0251893
	Unigene7024	2 292 minus strand hypothetical protein ARALYDRAFT_488833 [Arabidopsis lyrata subsp. lyrata] >gi|297317722|gb|EFH48144.1| hypothetical protein ARALYDRAFT_488833 [Arabidopsis lyrata subsp. lyrata]		2	55	1.132			Unigene7024	comp13528_c0_seq1	0.913631	0.467844
	CL1280.Contig1	92 1516 minus strand protein transport protein SEC61 subunit alpha [Arabidopsis thaliana] >gi|79324249|ref|NP_001031476.1| protein transport protein SEC61 subunit alpha [Arabidopsis thaliana] >gi|13605799|gb|AAK32885.1|AF367298_1 At2g34250/F13P1	CL1280.Contig2 CL1280.Contig3	5	78	1.488			CL1280.Contig1	comp32153_c0_seq1	-1.95731	0.0301127
	Unigene7552	65 730 uncharacterized protein [Arabidopsis thaliana] >gi|332661604|gb|AEE87004.1| uncharacterized protein [Arabidopsis thaliana]		6	351	0.851			Unigene7552	comp16534_c0_seq1	0.2246	0.98254
	CL13296.Contig1	102 434 hypothetical protein ARALYDRAFT_896292 [Arabidopsis lyrata subsp. lyrata] >gi|297330193|gb|EFH60612.1| hypothetical protein ARALYDRAFT_896292 [Arabidopsis lyrata subsp. lyrata]	CL13296.Contig2 Unigene23310 Unigene23311	2	73	1.748			CL13296.Contig1	comp30361_c0_seq4	0.314643	0.862489
	CL2995.Contig1	154 1611 selenium-binding protein, partial [Eutrema halophilum]		42	1293	0.661	*	-	CL2995.Contig1	comp21854_c0_seq1	35.4327	8.21e-08	+
	CL8227.Contig1	58 1878 minus strand unnamed protein product [Thellungiella halophila]	CL8227.Contig2	16	380	1.187			CL8227.Contig1	comp12261_c0_seq1	-5.23073	6.24e-08	-
	Unigene23495	2 337 heat shock cognate protein HSC70 [Brassica napus]		2	287	2.89			Unigene23495	comp15004_c0_seq1	1.60311	0.461399
	Unigene27310	130 327 minus strand peroxidase [Brassica napus]		4	53	0.377	*	-	Unigene27310	comp29794_c3_seq1	-6.20832	1.97e-11	-
	CL7498.Contig3	145 861 carboxymethylenebutenolidase [Arabidopsis thaliana] >gi|30102612|gb|AAP21224.1| At2g32520 [Arabidopsis thaliana] >gi|330253602|gb|AEC08696.1| carboxymethylenebutenolidase [Arabidopsis thaliana]		2	175	0.828			CL7498.Contig3	comp25845_c0_seq1	1.61917	0.0658878
	Unigene8620	94 1029 minus strand unknown protein [Arabidopsis thaliana]		9	246	1.223			Unigene8620	comp12081_c0_seq1	30.9733	0.205076
	CL6821.Contig1	129 1049 minus strand unnamed protein product [Thellungiella halophila]		14	340	0.868			CL6821.Contig1	comp13633_c0_seq2	1.88562	0.0434514
	Unigene6665	74 1363 glycosyl hydrolase family 17 protein [Arabidopsis lyrata subsp. lyrata] >gi|297311328|gb|EFH41752.1| glycosyl hydrolase family 17 protein [Arabidopsis lyrata subsp. lyrata]		20	779	0.642	*	-	Unigene6665	comp33308_c0_seq1	2.11837	0.0117072
	CL5644.Contig3	128 1078 RecName: Full=Plastid lipid-associated protein 2, chloroplastic; Flags: Precursor >gi|14248556|gb|AAK57565.1|AF290567_1 plastid-lipid associated protein PAP2 [Brassica rapa subsp. campestris]		4	135	0.605			CL5644.Contig3	comp26866_c0_seq1	32.5707	0.0102723
	Unigene17237	72 482 cystatin/monellin-related protein [Arabidopsis thaliana] >gi|332003440|gb|AED90823.1| cystatin/monellin-related protein [Arabidopsis thaliana]		2	63	0.63			Unigene17237	comp24455_c0_seq3	0.563576	0.730256
	CL11028.Contig3	2 211 hypothetical protein ARALYDRAFT_908774 [Arabidopsis lyrata subsp. lyrata] >gi|297317150|gb|EFH47572.1| hypothetical protein ARALYDRAFT_908774 [Arabidopsis lyrata subsp. lyrata]		2	84	0.802			CL11028.Contig3	comp15069_c0_seq1	-2.53029	0.478904
	CL8989.Contig2	123 1022 minus strand peroxisomal small heat shock protein ACD31.2 [Brassica rapa]		8	450	0.65			CL8989.Contig2	comp28765_c0_seq1	1.20713	0.320776
	CL13450.Contig2	3 983 minus strand CCR4-NOT transcription complex subunit 3 [Arabidopsis thaliana] >gi|332005139|gb|AED92522.1| CCR4-NOT transcription complex subunit 3 [Arabidopsis thaliana]		2	145	0.982			CL13450.Contig2	comp31628_c1_seq1	-0.359582	0.816464
	Unigene22337	138 1070 unknown [Arabidopsis thaliana]		4	40	1.441			Unigene22337	comp13136_c0_seq1	-0.391224	0.809972
	Unigene16718	1 801 minus strand lectin-like protein [Arabidopsis thaliana] >gi|7378615|emb|CAB83291.1| protein kinase-like [Arabidopsis thaliana] >gi|51972156|gb|AAU15182.1| At5g03350 [Arabidopsis thaliana] >gi|332003207|gb|AED90590.1| lectin-like protein [A		5	178	0.562	*	-	Unigene16718	comp17359_c0_seq1	-2.58853	0.041623
	CL292.Contig1	87 2066 minus strand hypothetical protein ARALYDRAFT_475871 [Arabidopsis lyrata subsp. lyrata] >gi|297334457|gb|EFH64875.1| hypothetical protein ARALYDRAFT_475871 [Arabidopsis lyrata subsp. lyrata]		11	299	1.252	*	+	CL292.Contig1	comp21826_c0_seq1	0.526544	0.948145
	CL11589.Contig3	152 1687 minus strand glucose-6-phosphate dehydrogenase 6 [Arabidopsis lyrata subsp. lyrata] >gi|297316514|gb|EFH46937.1| glucose-6-phosphate dehydrogenase 6 [Arabidopsis lyrata subsp. lyrata]		4	349	1.281			CL11589.Contig3	comp14920_c0_seq1	-0.988234	0.323731
	CL9226.Contig1	64 540 RecName: Full=Probable NADH dehydrogenase [ubiquinone] 1 alpha subcomplex subunit 12 >gi|21593289|gb|AAM65238.1| probable NADH-ubiquinone oxidoreductase subunit B17.2 (Complex I-B17.2) (CI-B17.2) [Arabidopsis thaliana]		2	40	1.197			CL9226.Contig1	comp24501_c0_seq1	0.836846	0.609414
	CL10729.Contig1	151 1767 minus strand hypothetical protein ARALYDRAFT_337380 [Arabidopsis lyrata subsp. lyrata] >gi|297337526|gb|EFH67943.1| hypothetical protein ARALYDRAFT_337380 [Arabidopsis lyrata subsp. lyrata]		12	303	1.336	*	+	CL10729.Contig1	comp22854_c0_seq3	5.22719	0.00777489
	CL9130.Contig1	2 1075 coatomer subunit beta-1 [Arabidopsis thaliana] >gi|334187063|ref|NP_001190880.1| coatomer subunit beta-1 [Arabidopsis thaliana] >gi|146286090|sp|Q9SV21.2|COPB1_ARATH RecName: Full=Coatomer subunit beta-1; AltName: Full=Beta-coat protein 1;	CL9130.Contig2	4	248	1.682			CL9130.Contig1	comp32084_c0_seq7	1.59264	0.126918
	Unigene18170	105 470 ATP synthase subunit G protein [Arabidopsis thaliana] >gi|14517504|gb|AAK62642.1| AT4g29480/F17A13_300 [Arabidopsis thaliana] >gi|15809754|gb|AAL06805.1| AT4g29480/F17A13_300 [Arabidopsis thaliana] >gi|21594744|gb|AAM66039.1| copia-like r	Unigene20338	2	71	0.876			Unigene18170	comp23315_c0_seq1	0.341838	0.834635
	CL10317.Contig4	23 1756 sterol 3beta-glucosyltransferase [Arabidopsis thaliana] >gi|6729009|gb|AAF27006.1|AC016827_17 UDP-glucose:sterol glucosyltransferase [Arabidopsis thaliana] >gi|332640968|gb|AEE74489.1| sterol 3beta-glucosyltransferase [Arabidopsis thalian		2	79	1.38			CL10317.Contig4	comp28125_c0_seq1	1.07262	0.532106
	Unigene6568	57 527 minus strand uncharacterized protein [Arabidopsis thaliana] >gi|334182563|ref|NP_001184989.1| uncharacterized protein [Arabidopsis thaliana] >gi|334182565|ref|NP_001184990.1| uncharacterized protein [Arabidopsis thaliana] >gi|8778391|gb|A		2	104	1.292			Unigene6568	comp24038_c0_seq1	2.36652	0.0118906
	CL7147.Contig1	255 2186 hypothetical protein ARALYDRAFT_325766 [Arabidopsis lyrata subsp. lyrata] >gi|297319410|gb|EFH49832.1| hypothetical protein ARALYDRAFT_325766 [Arabidopsis lyrata subsp. lyrata]		2	54	0.48			CL7147.Contig1	comp24836_c0_seq2	2.25107	0.215042
	Unigene30	1 963 minus strand VHS and GAT domain-containing protein [Arabidopsis thaliana] >gi|209529799|gb|ACI49794.1| At2g38410 [Arabidopsis thaliana] >gi|330254440|gb|AEC09534.1| VHS and GAT domain-containing protein [Arabidopsis thaliana]		4	251	0.766			Unigene30	comp23132_c0_seq3	32.2035	0.0251893
	CL1012.Contig2	152 1378 metacaspase 7 [Arabidopsis lyrata subsp. lyrata] >gi|297333622|gb|EFH64040.1| metacaspase 7 [Arabidopsis lyrata subsp. lyrata]		14	461	0.887			CL1012.Contig2	comp25964_c0_seq2	-0.137564	1
	Unigene7150	55 747 hypothetical protein ARALYDRAFT_914296 [Arabidopsis lyrata subsp. lyrata] >gi|297315627|gb|EFH46050.1| hypothetical protein ARALYDRAFT_914296 [Arabidopsis lyrata subsp. lyrata]		7	185	0.547			Unigene7150	comp14120_c0_seq1	-4.85478	4.97e-08	-
	CL4340.Contig1	122 1063 glyoxalase II 3 [Arabidopsis thaliana] >gi|334302900|sp|Q9C8L4.3|GLO2O_ARATH RecName: Full=Hydroxyacylglutathione hydrolase 3, mitochondrial; AltName: Full=Glyoxalase II; Short=Glx II; Flags: Precursor >gi|332194844|gb|AEE32965.1| glyoxa	CL4340.Contig3 CL4340.Contig4 CL4340.Contig5 CL4340.Contig6 CL4340.Contig7 CL4340.Contig8 CL4340.Contig9	36	1079	0.83	*	-	CL4340.Contig1	comp65493_c0_seq1	-0.0828287	1
	CL7539.Contig1	149 1432 ribosomal protein S24/S35 [Arabidopsis thaliana] >gi|30684850|ref|NP_850608.1| ribosomal protein S24/S35 [Arabidopsis thaliana] >gi|11692818|gb|AAG40012.1|AF324661_1 AT3g18240 [Arabidopsis thaliana] >gi|222422869|dbj|BAH19421.1| AT3G1824		5	128	0.84			CL7539.Contig1	comp30469_c0_seq1	-1.20836	0.239104
	CL12795.Contig1	99 779 minus strand succinate dehydrogenase 5 [Arabidopsis thaliana] >gi|25091506|sp|Q9SX77.1|UMP6_ARATH RecName: Full=Uncharacterized protein At1g47420, mitochondrial; Flags: Precursor >gi|5668814|gb|AAD46040.1|AC007519_25 ESTs gb|H36253 and gb		14	478	1.227	*	+	CL12795.Contig1	comp25853_c0_seq1	0.110398	0.983928
	CL13967.Contig1	112 831 minus strand RecName: Full=Probable ATP synthase 24 kDa subunit, mitochondrial; Flags: Precursor		2	62	1.32			CL13967.Contig1	comp28958_c0_seq1	-0.277278	0.860069
	CL6758.Contig1	2 1381 T-complex protein 1 subunit alpha [Arabidopsis thaliana] >gi|135535|sp|P28769.1|TCPA_ARATH RecName: Full=T-complex protein 1 subunit alpha; Short=TCP-1-alpha; AltName: Full=CCT-alpha >gi|217871|dbj|BAA01955.1| t-complex polypeptide 1 homol	CL6758.Contig2	7	185	1.332			CL6758.Contig1	comp30801_c0_seq2	1.66069	0.0671752
	Unigene29728	70 852 minus strand hypothetical protein ARALYDRAFT_494916 [Arabidopsis lyrata subsp. lyrata] >gi|297311484|gb|EFH41908.1| hypothetical protein ARALYDRAFT_494916 [Arabidopsis lyrata subsp. lyrata]		4	137	0.629			Unigene29728	comp13014_c0_seq1	3.16419	0.00064787	+
	Unigene28521	1 483 minus strand heat shock cognate protein HSC70 [Brassica napus]		4	948	1.468			Unigene28521	comp3191_c0_seq1	0.116451	1
	Unigene25449	1 1281 phosphoribosylaminoimidazolecarboxamide formyltransferase / IMP [Arabidopsis thaliana] >gi|330253961|gb|AEC09055.1| phosphoribosylaminoimidazolecarboxamide formyltransferase / IMP [Arabidopsis thaliana]		5	253	1.358			Unigene25449	comp31376_c0_seq1	-1.04314	0.281405
	Unigene1371	96 548 splicing factor 3B subunit 3 [Arabidopsis thaliana] >gi|7019653|emb|CAB75754.1| spliceosomal-like protein [Arabidopsis thaliana] >gi|7019655|emb|CAB75756.1| spliceosomal-like protein [Arabidopsis thaliana] >gi|332645831|gb|AEE79352.1| spli		2	50	1.033			Unigene1371	comp31936_c1_seq2	0.629342	0.621065
	CL12013.Contig1	103 471 minus strand putative nuclear transport factor 2 [Brassica rapa]		6	165	0.641			CL12013.Contig1	comp12726_c0_seq1	2.573	0.0167156
	Unigene1012	166 1497 ATGDI2 [Arabidopsis lyrata subsp. lyrata] >gi|297322366|gb|EFH52787.1| ATGDI2 [Arabidopsis lyrata subsp. lyrata]		13	410	1.175			Unigene1012	comp29274_c0_seq4	1.72633	0.0518956
	CL7016.Contig1	3 755 minus strand Chain A, Crystal Structure Analysis Of The Plant Protease Deg1 >gi|332138235|pdb|3QO6|B Chain B, Crystal Structure Analysis Of The Plant Protease Deg1 >gi|332138236|pdb|3QO6|C Chain C, Crystal Structure Analysis Of The Plant P		5	142	0.852			CL7016.Contig1	comp27336_c0_seq1	-0.50792	0.707192
	CL8166.Contig1	27 2213 protein GRIP [Arabidopsis thaliana] >gi|205785634|sp|Q8S2T0.2|GRIP_ARATH RecName: Full=Protein GRIP; Short=AtGRIP >gi|332010760|gb|AED98143.1| protein GRIP [Arabidopsis thaliana]		4	101	0.841			CL8166.Contig1	comp31018_c0_seq4	34.6444	3.49e-06	+
	CL5587.Contig1	120 344 catalase 3 [Raphanus sativus]	CL5587.Contig2	3	136	2.993	*	+	CL5587.Contig1	comp30938_c0_seq1	-3.05283	0.000209872	-
	CL4308.Contig1	1 1956 cobalamin-independent methionine synthase [Arabidopsis lyrata subsp. lyrata] >gi|297317624|gb|EFH48046.1| cobalamin-independent methionine synthase [Arabidopsis lyrata subsp. lyrata]		49	2279	1.758	*	+	CL4308.Contig1	comp12095_c0_seq1	3.43824	6.17e-05	+
	CL4672.Contig2	67 1110 minus strand beta-amylase [Arabidopsis lyrata subsp. lyrata] >gi|297314056|gb|EFH44479.1| beta-amylase [Arabidopsis lyrata subsp. lyrata]		7	290	0.895			CL4672.Contig2	comp26006_c0_seq2	-31.4447	0.139691
	Unigene29619	132 1445 minus strand glutamate dehydrogenase 1 [Arabidopsis thaliana] >gi|12229807|sp|Q43314.1|DHE1_ARATH RecName: Full=Glutamate dehydrogenase 1; Short=GDH 1 >gi|1098960|gb|AAA82615.1| glutamate dehydrogenase 1 [Arabidopsis thaliana] >gi|12930		5	137	0.932			Unigene29619	comp29732_c1_seq31	-0.667433	0.543139
	CL1202.Contig12	119 1294 minus strand ThiJ-like protein [Brassica rapa subsp. pekinensis]	CL1202.Contig13	29	884	2.192	*	+	CL1202.Contig12	comp20971_c0_seq1	-1.74976	0.0512628
	CL4764.Contig1	107 2320 minus strand ATCUL1 [Arabidopsis lyrata subsp. lyrata] >gi|297320746|gb|EFH51168.1| ATCUL1 [Arabidopsis lyrata subsp. lyrata]	CL4764.Contig2 CL4764.Contig3 CL4764.Contig4	2	46	1.295			CL4764.Contig1	comp10905_c0_seq1	-0.378285	0.837231
	CL2249.Contig2	1 1005 minus strand hypothetical protein ARALYDRAFT_896937 [Arabidopsis lyrata subsp. lyrata] >gi|297330502|gb|EFH60921.1| hypothetical protein ARALYDRAFT_896937 [Arabidopsis lyrata subsp. lyrata]		2	102	0.91			CL2249.Contig2	comp31873_c0_seq1	-0.168343	0.969759
	CL14365.Contig4	115 1461 minus strand elongation factor 1 alpha [Brassica napus]	CL14365.Contig5	10	1596	2.487			CL14365.Contig4	comp16017_c0_seq4	-1.3163	0.265433
	CL9898.Contig1	143 451 Remorin [Arabidopsis thaliana] >gi|75099946|sp|O80837.1|REMO_ARATH RecName: Full=Remorin; AltName: Full=DNA-binding protein >gi|3386612|gb|AAC28542.1| remorin [Arabidopsis thaliana] >gi|330255511|gb|AEC10605.1| Remorin [Arabidopsis thalia	CL9898.Contig3	3	30	0.99			CL9898.Contig1	comp24445_c0_seq1	1.08509	0.235888
	CL11669.Contig1	174 923 proteasome subunit alpha type-4 [Arabidopsis thaliana] >gi|12643237|sp|O81148.1|PSA4_ARATH RecName: Full=Proteasome subunit alpha type-4; AltName: Full=20S proteasome alpha subunit C-1; AltName: Full=Proteasome 27 kDa subunit; AltName: Fu		12	237	0.824			CL11669.Contig1	comp28968_c0_seq1	0.272047	0.866707
	CL14304.Contig1	170 1453 hypothetical protein ARALYDRAFT_482020 [Arabidopsis lyrata subsp. lyrata] >gi|297325134|gb|EFH55554.1| hypothetical protein ARALYDRAFT_482020 [Arabidopsis lyrata subsp. lyrata]		3	74	1.325			CL14304.Contig1	comp57254_c0_seq1	0.376603	0.934475
	CL6345.Contig1	156 2018 minus strand hypothetical protein ARALYDRAFT_906663 [Arabidopsis lyrata subsp. lyrata] >gi|297322008|gb|EFH52429.1| hypothetical protein ARALYDRAFT_906663 [Arabidopsis lyrata subsp. lyrata]		4	190	0.643	*	-	CL6345.Contig1	comp73613_c0_seq1	1.20668	0.650873
	Unigene354	186 920 minus strand unknown protein [Arabidopsis thaliana]	Unigene355	2	172	1.05			Unigene354	comp20330_c0_seq3	-1.43771	0.149916
	CL5714.Contig1	22 1452 minus strand aspartyl protease family protein [Arabidopsis thaliana] >gi|18700103|gb|AAL77663.1| AT5g10770/T30N20_40 [Arabidopsis thaliana] >gi|24111269|gb|AAN46758.1| At5g10770/T30N20_40 [Arabidopsis thaliana] >gi|332004211|gb|AED91594.	CL5714.Contig4	4	196	1.034			CL5714.Contig1	comp923_c0_seq1	31.6514	0.0686039
	CL9121.Contig1	5 2989 minus strand unnamed protein product [Thellungiella halophila]		9	231	1.534	*	+	CL9121.Contig1	comp26989_c0_seq1	1.21059	0.205076
	CL201.Contig3	53 1867 hypothetical protein ARALYDRAFT_481452 [Arabidopsis lyrata subsp. lyrata] >gi|297326568|gb|EFH56988.1| hypothetical protein ARALYDRAFT_481452 [Arabidopsis lyrata subsp. lyrata]	CL201.Contig6 CL201.Contig7	42	1349	0.926			CL201.Contig3	comp31070_c0_seq9	0.449534	0.748835
	CL1234.Contig2	2 2062 minus strand hypothetical protein [Arabidopsis thaliana]		10	612	1.099			CL1234.Contig2	comp32079_c0_seq1	1.57824	0.123153
	Unigene29789	96 1532 minus strand unnamed protein product [Thellungiella halophila]		4	53	1.165			Unigene29789	comp32937_c0_seq1	-0.201742	0.916934
	CL11540.Contig1	1 888 minus strand dehydratase family [Arabidopsis lyrata subsp. lyrata] >gi|297331467|gb|EFH61886.1| dehydratase family [Arabidopsis lyrata subsp. lyrata]		3	228	0.515			CL11540.Contig1	comp32047_c0_seq1	1.11644	0.268423
	CL8495.Contig1	144 761 RAB GTPase homolog G3D [Arabidopsis thaliana] >gi|75169431|sp|Q9C820.1|RAG3D_ARATH RecName: Full=Ras-related protein RABG3d; Short=AtRABG3d; AltName: Full=Ras-related protein Rab72; Short=AtRab72 >gi|15718410|dbj|BAB68372.1| AtRab72 [Arab		2	221	1.097			CL8495.Contig1	comp30968_c0_seq5	31.1419	0.205076
	CL9278.Contig1	104 829 minus strand pathogenesis-related group 5 protein [Brassica rapa]	CL9278.Contig2	3	79	0.397	*	-	CL9278.Contig1	comp50648_c0_seq1	33.8993	9.18e-05	+
	CL1934.Contig2	60 803 minus strand 14-3-3-like protein GF14 Lambda [Eutrema salsugineum]		4	525	1.298			CL1934.Contig2	comp27044_c0_seq2	32.2363	0.0251893
	Unigene16372	168 536 minus strand cold-regulated protein [Brassica napus]		8	968	0.878			Unigene16372	comp19702_c0_seq2	0.183043	1
	CL2887.Contig3	118 1293 minus strand RNA recognition motif-containing protein [Arabidopsis thaliana] >gi|75331668|sp|Q93W34.1|RP45C_ARATH RecName: Full=Polyadenylate-binding protein RBP45C; Short=Poly(A)-binding protein RBP45C; AltName: Full=RNA-binding protei	Unigene24469	5	503	1.1			CL2887.Contig3	comp20645_c0_seq1	-0.759497	0.460441
	CL11453.Contig1	767 1633 histone deacetylase HDT3 [Arabidopsis thaliana] >gi|73919942|sp|Q9LZR5.2|HDT3_ARATH RecName: Full=Histone deacetylase HDT3; AltName: Full=HD-tuins protein 3; AltName: Full=Histone deacetylase 2c >gi|13926268|gb|AAK49605.1|AF372889_1 AT5g		10	210	1.209			CL11453.Contig1	comp27475_c0_seq2	-1.00483	0.439716
	Unigene19473	42 593 histidine triad nucleotide-binding 2 protein [Arabidopsis thaliana] >gi|332193198|gb|AEE31319.1| histidine triad nucleotide-binding 2 protein [Arabidopsis thaliana]		2	97	0.911			Unigene19473	comp36043_c0_seq1	0.952105	0.353433
	Unigene29890	120 797 minus strand 117M18_14 [Brassica rapa]		4	126	0.873			Unigene29890	comp27229_c0_seq2	0.805806	0.450096
	Unigene2789	193 1605 minus strand ANAC008 [Arabidopsis lyrata subsp. lyrata] >gi|297336524|gb|EFH66941.1| ANAC008 [Arabidopsis lyrata subsp. lyrata]		2	52	0.563			Unigene2789	comp16295_c0_seq1	-1.79332	0.586561
	Unigene17526	66 266 hypothetical protein ARALYDRAFT_477484 [Arabidopsis lyrata subsp. lyrata] >gi|297328072|gb|EFH58491.1| hypothetical protein ARALYDRAFT_477484 [Arabidopsis lyrata subsp. lyrata]		3	100	0.546			Unigene17526	comp12205_c0_seq2	0.0811471	1
	CL2397.Contig5	1 297 60S ribosomal protein L4/L1 [Arabidopsis lyrata subsp. lyrata] >gi|297328470|gb|EFH58889.1| 60S ribosomal protein L4/L1 [Arabidopsis lyrata subsp. lyrata]		2	115	2.407			CL2397.Contig5	comp31482_c0_seq12	-0.357441	0.820674
	CL5562.Contig1	6 1337 RecName: Full=Probable UDP-N-acetylglucosamine pyrophosphorylase >gi|18087511|gb|AAL58890.1|AF462794_1 At2g35020/F19I3.25 [Arabidopsis thaliana] >gi|56382033|gb|AAV85735.1| At2g35020 [Arabidopsis thaliana] >gi|295126564|gb|ADF80195.1| UTP:		4	57	0.808			CL5562.Contig1	comp10303_c0_seq1	-0.829848	0.46464
	Unigene6569	216 713 minus strand hypothetical protein ARALYDRAFT_483759 [Arabidopsis lyrata subsp. lyrata] >gi|297326058|gb|EFH56478.1| hypothetical protein ARALYDRAFT_483759 [Arabidopsis lyrata subsp. lyrata]		13	446	0.672	*	-	Unigene6569	comp12626_c0_seq1	-3.11525	0.0570073
	CL416.Contig1	79 591 adenine nucleotide alpha hydrolases-like protein [Arabidopsis thaliana] >gi|29028798|gb|AAO64778.1| At1g09740 [Arabidopsis thaliana] >gi|332190366|gb|AEE28487.1| adenine nucleotide alpha hydrolases-like protein [Arabidopsis thaliana]		3	52	0.78			CL416.Contig1	comp25542_c0_seq3	-2.9798	0.0044526
	CL6619.Contig1	125 2683 minus strand MYB transcription factor [Arabidopsis lyrata subsp. lyrata] >gi|297335611|gb|EFH66028.1| MYB transcription factor [Arabidopsis lyrata subsp. lyrata]	CL6619.Contig2	3	81	1.123			CL6619.Contig1	comp30554_c0_seq6	-2.94605	0.257553
	CL7417.Contig1	128 1354 minus strand hypothetical protein ARALYDRAFT_491217 [Arabidopsis lyrata subsp. lyrata] >gi|297314980|gb|EFH45403.1| hypothetical protein ARALYDRAFT_491217 [Arabidopsis lyrata subsp. lyrata]		7	233	1.417			CL7417.Contig1	comp31832_c0_seq3	0.905553	0.345009
	CL12309.Contig1	1 507 splicing factor 3B subunit 2 [Arabidopsis thaliana] >gi|332659087|gb|AEE84487.1| splicing factor 3B subunit 2 [Arabidopsis thaliana]		7	235	0.875			CL12309.Contig1	comp31110_c2_seq1	-0.339604	0.863482
	Unigene2385	68 883 minus strand cyclase family protein [Arabidopsis lyrata subsp. lyrata] >gi|297314934|gb|EFH45357.1| cyclase family protein [Arabidopsis lyrata subsp. lyrata]		8	112	0.555	*	-	Unigene2385	comp29408_c0_seq1	-2.61242	0.00492136
	CL42.Contig1	170 1300 minus strand actin 2 [Arabidopsis thaliana] >gi|25452790|sp|Q96292.1|ACT2_ARATH RecName: Full=Actin-2 >gi|16226780|gb|AAL16260.1|AF428330_1 AT3g18780/MVE11_16 [Arabidopsis thaliana] >gi|1669387|gb|AAB37098.1| actin 2 [Arabidopsis thalia	CL42.Contig3	4	941	1.257			CL42.Contig1	comp32585_c0_seq1	-0.17172	0.948145
	CL3756.Contig1	111 1517 minus strand UDP-glucose pyrophosphorylase [Arabidopsis lyrata subsp. lyrata] >gi|297330206|gb|EFH60625.1| UDP-glucose pyrophosphorylase [Arabidopsis lyrata subsp. lyrata]		43	1283	1.1			CL3756.Contig1	comp25565_c0_seq8	3.94204	0.000260482	+
	CL538.Contig1	149 1606 hypothetical protein ARALYDRAFT_472256 [Arabidopsis lyrata subsp. lyrata] >gi|297336218|gb|EFH66635.1| hypothetical protein ARALYDRAFT_472256 [Arabidopsis lyrata subsp. lyrata]	CL538.Contig2 CL538.Contig5	5	1696	0.733			CL538.Contig1	comp29685_c0_seq2	1.41465	0.112338
	Unigene6458	156 557 minus strand hypothetical protein ARALYDRAFT_917431 [Arabidopsis lyrata subsp. lyrata] >gi|297309563|gb|EFH39987.1| hypothetical protein ARALYDRAFT_917431 [Arabidopsis lyrata subsp. lyrata]		2	75	1.417			Unigene6458	comp32870_c0_seq1	-2.08055	0.0137247
	CL13500.Contig1	85 279 minus strand uncharacterized protein [Arabidopsis thaliana] >gi|15215610|gb|AAK91350.1| F11C10.23/F11C10.23 [Arabidopsis thaliana] >gi|20197774|gb|AAD20165.2| expressed protein [Arabidopsis thaliana] >gi|20334882|gb|AAM16197.1| At2g46540/		2	72	0.632			CL13500.Contig1	comp33304_c0_seq1	0.496634	0.703164
	CL128.Contig2	146 1921 minus strand MTHFR1 [Arabidopsis lyrata subsp. lyrata] >gi|297322369|gb|EFH52790.1| MTHFR1 [Arabidopsis lyrata subsp. lyrata]		12	627	1.115			CL128.Contig2	comp31788_c0_seq4	2.04838	0.0163444
	CL5597.Contig1	1 1608 minus strand 26S proteasome regulatory subunit N2 [Arabidopsis thaliana] >gi|20466790|gb|AAM20712.1| 26S proteasome regulatory subunit [Arabidopsis thaliana] >gi|330253636|gb|AEC08730.1| 26S proteasome regulatory subunit N2 [Arabidopsis t		5	391	0.974			CL5597.Contig1	comp21697_c0_seq1	0.443717	0.866508
	CL7380.Contig1	56 448 minus strand Sin a 4 allergen [Sinapis alba]		8	131	0.578			CL7380.Contig1	comp8_c0_seq1	2.3766	0.353433
	CL3722.Contig1	14 1069 minus strand pfkB-like carbohydrate kinase family protein [Arabidopsis thaliana] >gi|42573429|ref|NP_974811.1| pfkB-like carbohydrate kinase family protein [Arabidopsis thaliana] >gi|75164964|sp|Q94AF2.1|NNRD_ARATH RecName: Full=ATP-depe	CL3722.Contig2 Unigene24295	3	104	0.876			CL3722.Contig1	comp25164_c0_seq2	33.1095	0.00170759
	CL4222.Contig4	56 886 minus strand hypothetical protein ARALYDRAFT_482714 [Arabidopsis lyrata subsp. lyrata] >gi|297327336|gb|EFH57756.1| hypothetical protein ARALYDRAFT_482714 [Arabidopsis lyrata subsp. lyrata]	CL4222.Contig5 CL4222.Contig6	6	276	1.198			CL4222.Contig4	comp29363_c0_seq9	-0.306	0.946723
	Unigene17782	3 572 minus strand NifU-like protein 4 [Arabidopsis thaliana] >gi|75273382|sp|Q9LIG6.1|NIFU4_ARATH RecName: Full=NifU-like protein 4, mitochondrial; Short=AtNfu-III; Short=AtNfu4; Flags: Precursor >gi|28207822|emb|CAD55561.1| NFU4 protein [Arabi		4	184	1.342			Unigene17782	comp26818_c0_seq1	-0.892332	0.398091
	CL6093.Contig2	39 1292 minus strand protein-protein interaction regulator family protein [Arabidopsis thaliana] >gi|332191160|gb|AEE29281.1| protein-protein interaction regulator family protein [Arabidopsis thaliana]		2	65	1.005			CL6093.Contig2	comp12945_c0_seq1	-35.614	3.35e-08	-
	CL12221.Contig1	56 1291 minus strand hypothetical protein ARALYDRAFT_479366 [Arabidopsis lyrata subsp. lyrata] >gi|297331106|gb|EFH61525.1| hypothetical protein ARALYDRAFT_479366 [Arabidopsis lyrata subsp. lyrata]		10	269	1.674	*	+	CL12221.Contig1	comp22191_c0_seq1	-0.41481	0.889098
	CL75.Contig3	2 1441 minus strand hypothetical protein MTR_027s0011 [Medicago truncatula] >gi|355502031|gb|AES83234.1| hypothetical protein MTR_027s0011 [Medicago truncatula]		7	221	0.874			CL75.Contig3	comp31474_c0_seq4	2.20078	0.0206119
	Unigene390	209 841 minus strand RAB GTPase-C2A [Arabidopsis thaliana] >gi|75098916|sp|O49841.1|RAC2A_ARATH RecName: Full=Ras-related protein RABC2a; Short=AtRABC2a; AltName: Full=Ras-related protein Rab18B; Short=AtRab18B >gi|2723477|dbj|BAA24074.1| GTP-bi	Unigene25338 Unigene25339	5	98	1.26			Unigene390	comp84163_c0_seq1	-1.20836	0.780368
	CL11260.Contig2	2 829 S-formylglutathione hydrolase [Arabidopsis thaliana] >gi|114152156|sp|Q8LAS8.2|SFGH_ARATH RecName: Full=S-formylglutathione hydrolase; Short=AtSFGH; AltName: Full=Esterase D >gi|14190395|gb|AAK55678.1|AF378875_1 At2g41530/T32G6.5 [Arabidops		4	190	0.574			CL11260.Contig2	comp28608_c1_seq4	-0.316636	0.848638
	Unigene8412	82 615 minus strand pyrophosphate--fructose-6-phosphate 1-phosphotransferase [Arabidopsis thaliana] >gi|332656965|gb|AEE82365.1| pyrophosphate--fructose-6-phosphate 1-phosphotransferase [Arabidopsis thaliana]		5	229	0.944			Unigene8412	comp11053_c0_seq1	-3.44102	0.000383323	-
	CL10051.Contig2	84 695 minus strand hypothetical protein ARALYDRAFT_495994 [Arabidopsis lyrata subsp. lyrata] >gi|297310421|gb|EFH40845.1| hypothetical protein ARALYDRAFT_495994 [Arabidopsis lyrata subsp. lyrata]		7	107	1.183			CL10051.Contig2	comp30142_c0_seq1	0.651729	0.551325
	CL9002.Contig1	135 1529 minus strand EIF2 gamma [Arabidopsis lyrata subsp. lyrata] >gi|297335336|gb|EFH65753.1| EIF2 gamma [Arabidopsis lyrata subsp. lyrata]		5	96	1.022			CL9002.Contig1	comp37697_c0_seq1	-0.667791	0.725901
	CL9875.Contig2	43 2361 Subtilase family protein [Arabidopsis thaliana] >gi|11994380|dbj|BAB02339.1| cucumisin-like serine protease; subtilisin-like protease [Arabidopsis thaliana] >gi|44917461|gb|AAS49055.1| At3g14067 [Arabidopsis thaliana] >gi|45773916|gb|AAS7		6	206	0.625	*	-	CL9875.Contig2	comp42992_c0_seq1	0.0754334	1
	CL4590.Contig3	126 683 unnamed protein product [Thellungiella halophila]		10	145	0.606	*	-	CL4590.Contig3	comp33568_c0_seq1	-0.24054	0.901278
	CL11582.Contig1	145 1056 minus strand RNA recognition motif-containing protein [Arabidopsis thaliana] >gi|20260152|gb|AAM12974.1| RNA-binding protein-like [Arabidopsis thaliana] >gi|21387121|gb|AAM47964.1| RNA-binding protein-like [Arabidopsis thaliana] >gi|332		6	173	1.322			CL11582.Contig1	comp24911_c0_seq1	0.126376	0.976035
	CL3406.Contig1	87 758 minus strand proteosome subunit [Arabidopsis thaliana]		4	414	0.615			CL3406.Contig1	comp27100_c0_seq1	0.276543	0.889098
	CL8021.Contig1	113 607 C2 domain-containing protein [Arabidopsis lyrata subsp. lyrata] >gi|297333171|gb|EFH63589.1| C2 domain-containing protein [Arabidopsis lyrata subsp. lyrata]		5	64	1.389			CL8021.Contig1	comp12259_c0_seq1	2.11357	0.478904
	Unigene29769	19 1458 unnamed protein product [Thellungiella halophila]		9	257	0.539	*	-	Unigene29769	comp24488_c0_seq2	-1.28636	0.180831
	Unigene16590	3 1049 hypothetical protein ARALYDRAFT_476563 [Arabidopsis lyrata subsp. lyrata] >gi|297334810|gb|EFH65228.1| hypothetical protein ARALYDRAFT_476563 [Arabidopsis lyrata subsp. lyrata]		3	64	1.025			Unigene16590	comp32176_c1_seq1	0.446729	0.743931
	Unigene22435	2 565 minus strand beta-fructofuranosidase 5 [Arabidopsis lyrata subsp. lyrata] >gi|297337654|gb|EFH68071.1| beta-fructofuranosidase 5 [Arabidopsis lyrata subsp. lyrata]		4	225	0.641			Unigene22435	comp43661_c0_seq1	-0.0466085	1
	CL2627.Contig2	1 369 AT2G16430 [Arabidopsis thaliana]		2	69	1.49	*	+	CL2627.Contig2	comp19448_c0_seq1	0.649045	0.561309
	CL10374.Contig1	2 385 hypothetical protein ARALYDRAFT_478519 [Arabidopsis lyrata subsp. lyrata] >gi|297330701|gb|EFH61120.1| hypothetical protein ARALYDRAFT_478519 [Arabidopsis lyrata subsp. lyrata]	CL10374.Contig2	2	115	2.054			CL10374.Contig1	comp23419_c0_seq1	1.32769	0.292894
	Unigene28391	112 969 minus strand unnamed protein product [Thellungiella halophila]		3	97	2.188	*	+	Unigene28391	comp23089_c1_seq1	33.6958	0.000216757	+
	CL375.Contig1	101 625 minus strand 60S ribosomal protein L17-2 [Arabidopsis thaliana] >gi|297838479|ref|XP_002887121.1| 60S ribosomal protein L17 [Arabidopsis lyrata subsp. lyrata] >gi|27735241|sp|P51413.2|RL172_ARATH RecName: Full=60S ribosomal protein L17-2		12	325	1.973	*	+	CL375.Contig1	comp29550_c0_seq5	1.18771	0.187827
	CL13594.Contig2	4 942 minus strand phosphoglycerate mutase-like protein [Arabidopsis thaliana] >gi|332195407|gb|AEE33528.1| phosphoglycerate mutase-like protein [Arabidopsis thaliana]		2	82	0.627	*	-	CL13594.Contig2	comp22656_c0_seq1	1.46075	0.210417
	CL8755.Contig3	99 698 uncharacterized protein [Arabidopsis thaliana] >gi|332641111|gb|AEE74632.1| uncharacterized protein [Arabidopsis thaliana]		2	47	1.05			CL8755.Contig3	comp27098_c0_seq1	3.94527	4.6e-06	+
	CL14560.Contig1	176 1327 coproporphyrinogen III oxidase [Arabidopsis lyrata subsp. lyrata] >gi|297338005|gb|EFH68422.1| coproporphyrinogen III oxidase [Arabidopsis lyrata subsp. lyrata]		7	168	1.031			CL14560.Contig1	comp15864_c0_seq1	1.25139	0.223279
	CL5596.Contig1	3 1076 hypothetical protein ARALYDRAFT_474095 [Arabidopsis lyrata subsp. lyrata] >gi|297340039|gb|EFH70456.1| hypothetical protein ARALYDRAFT_474095 [Arabidopsis lyrata subsp. lyrata]		4	265	0.693			CL5596.Contig1	comp31676_c0_seq14	4.2432	0.00466485
	Unigene20382	109 1068 Nitrilase 2 OS=Arabidopsis thaliana GN=NIT2 PE=1 SV=1		11	469	1.106			Unigene20382	comp14490_c0_seq1	-4.58044	1.27e-06	-
	Unigene999	360 2507 minus strand TIF3B1 [Arabidopsis lyrata subsp. lyrata] >gi|297318101|gb|EFH48523.1| TIF3B1 [Arabidopsis lyrata subsp. lyrata]		11	284	2.11	*	+	Unigene999	comp31282_c0_seq1	-0.222002	0.903022
	CL8455.Contig2	53 772 hypothetical protein ARALYDRAFT_494579 [Arabidopsis lyrata subsp. lyrata] >gi|297311218|gb|EFH41642.1| hypothetical protein ARALYDRAFT_494579 [Arabidopsis lyrata subsp. lyrata]		43	1420	0.827	*	-	CL8455.Contig2	comp20664_c0_seq1	6.76892	4.36e-09	+
	CL1396.Contig2	73 1521 minus strand hypothetical protein ARALYDRAFT_474037 [Arabidopsis lyrata subsp. lyrata] >gi|297337305|gb|EFH67722.1| hypothetical protein ARALYDRAFT_474037 [Arabidopsis lyrata subsp. lyrata]		9	268	1.814	*	+	CL1396.Contig2	comp33717_c0_seq1	-0.69591	0.522362
	CL981.Contig4	152 1378 Pectin lyase-like protein [Arabidopsis thaliana] >gi|16226325|gb|AAL16135.1|AF428303_1 AT3g05910/F2O10_3 [Arabidopsis thaliana] >gi|332640793|gb|AEE74314.1| Pectin lyase-like protein [Arabidopsis thaliana]		3	112	0.861			CL981.Contig4	comp28424_c0_seq1	1.75318	0.0694442
	CL6763.Contig1	58 1734 minus strand zeta-carotene desaturase [Brassica napus] >gi|345451252|gb|AEN94306.1| zeta-carotene desaturase [Brassica napus]	CL6763.Contig2	3	86	0.943			CL6763.Contig1	comp10120_c0_seq1	-34.8627	1.37e-06	-
	CL6977.Contig3	160 1617 6-phosphogluconate dehydrogenase family protein [Arabidopsis lyrata subsp. lyrata] >gi|297314418|gb|EFH44841.1| 6-phosphogluconate dehydrogenase family protein [Arabidopsis lyrata subsp. lyrata]		16	652	0.785			CL6977.Contig3	comp30610_c0_seq3	-1.02393	0.30518
	Unigene23022	2 1231 minus strand hypothetical protein ARALYDRAFT_473822 [Arabidopsis lyrata subsp. lyrata] >gi|297337138|gb|EFH67555.1| hypothetical protein ARALYDRAFT_473822 [Arabidopsis lyrata subsp. lyrata]		11	290	0.44	*	-	Unigene23022	comp29331_c0_seq1	0.0149405	1
	CL816.Contig1	120 2585 hypothetical protein ARALYDRAFT_492441 [Arabidopsis lyrata subsp. lyrata] >gi|297313513|gb|EFH43936.1| hypothetical protein ARALYDRAFT_492441 [Arabidopsis lyrata subsp. lyrata]		22	562	1.34	*	+	CL816.Contig1	comp29816_c0_seq6	-32.6702	0.00777489
	CL932.Contig1	3 1808 protein embryo defective 140 [Arabidopsis thaliana] >gi|332659481|gb|AEE84881.1| protein embryo defective 140 [Arabidopsis thaliana]		3	164	2.427			CL932.Contig1	comp30615_c0_seq2	-0.834799	0.644593
	CL4902.Contig10	138 1490 minus strand beta-Ig-H3 domain-containing protein [Arabidopsis lyrata subsp. lyrata] >gi|297328584|gb|EFH59003.1| beta-Ig-H3 domain-containing protein [Arabidopsis lyrata subsp. lyrata]	CL4902.Contig12 CL4902.Contig3 CL4902.Contig5 CL4902.Contig6 Unigene27332 Unigene27333	7	182	2.943	*	+	CL4902.Contig10	comp31017_c1_seq1	1.05331	0.300455
	Unigene24844	6 1397 minus strand MIF4G domain and MA3 domain-containing protein [Arabidopsis thaliana] >gi|332009581|gb|AED96964.1| MIF4G domain and MA3 domain-containing protein [Arabidopsis thaliana]		7	171	1.058	*		Unigene24844	comp30977_c0_seq1	0.199298	0.916934
	CL1033.Contig1	83 2947 minus strand hypothetical protein ARALYDRAFT_489971 [Arabidopsis lyrata subsp. lyrata] >gi|297320528|gb|EFH50950.1| hypothetical protein ARALYDRAFT_489971 [Arabidopsis lyrata subsp. lyrata]		12	456	1.282			CL1033.Contig1	comp36976_c0_seq1	-0.929076	0.33983
	CL557.Contig1	208 993 minus strand 40S ribosomal protein S4-2 [Arabidopsis thaliana] >gi|20143904|sp|P49204.4|RS42_ARATH RecName: Full=40S ribosomal protein S4-2 >gi|7546687|emb|CAB87265.1| ribosomal protein S4 [Arabidopsis thaliana] >gi|17979543|gb|AAL50106.		2	284	1.966			CL557.Contig1	comp62785_c0_seq1	0.348034	0.889098
	CL861.Contig1	185 1147 chitinase [Brassica rapa]	CL861.Contig2	3	192	0.513	*	-	CL861.Contig1	comp29963_c0_seq2	3.38899	4.77e-05	+
	CL754.Contig2	131 2374 minus strand hypothetical protein ARALYDRAFT_353746 [Arabidopsis lyrata subsp. lyrata] >gi|297313170|gb|EFH43593.1| hypothetical protein ARALYDRAFT_353746 [Arabidopsis lyrata subsp. lyrata]	CL754.Contig3	5	151	0.795			CL754.Contig2	comp31152_c0_seq2	0.474633	0.706433
	Unigene6583	67 342 minus strand 60S ribosomal protein L37a-2 [Arabidopsis thaliana] >gi|297817320|ref|XP_002876543.1| 60S ribosomal protein L37a [Arabidopsis lyrata subsp. lyrata] >gi|75247667|sp|Q8RXU5.1|R37A2_ARATH RecName: Full=60S ribosomal protein L37a	Unigene17683	6	291	1.274	*	+	Unigene6583	comp13857_c0_seq1	0.864998	0.388716
	CL3002.Contig1	45 1415 minus strand elongation factor E1 [Brassica oleracea var. capitata]	CL3002.Contig2	20	403	1.095			CL3002.Contig1	comp147146_c0_seq1	-1.20836	0.889098
	Unigene2988	158 1576 minus strand glycosyl hydrolase family 17 protein [Arabidopsis lyrata subsp. lyrata] >gi|297334120|gb|EFH64538.1| glycosyl hydrolase family 17 protein [Arabidopsis lyrata subsp. lyrata]		15	583	0.726	*	-	Unigene2988	comp7330_c0_seq1	-2.79332	0.353433
	CL8128.Contig1	133 696 thioredoxin F2 [Arabidopsis thaliana] >gi|11135405|sp|Q9XFH9.1|TRXF2_ARATH RecName: Full=Thioredoxin F2, chloroplastic; Short=AtTrxf2; AltName: Full=Thioredoxin F1; Short=AtTrxf1; Flags: Precursor >gi|4973254|gb|AAD35004.1|AF144386_1 thio	CL8128.Contig2	2	74	0.639			CL8128.Contig1	comp24656_c0_seq1	0.361956	0.816464
	CL11189.Contig1	20 925 minus strand small subunit ribosomal protein S9 [Arabidopsis thaliana] >gi|30387523|gb|AAP31927.1| At3g49080 [Arabidopsis thaliana] >gi|332644976|gb|AEE78497.1| small subunit ribosomal protein S9 [Arabidopsis thaliana]		3	99	1.008			CL11189.Contig1	comp28652_c0_seq1	0.130115	0.987975
	CL3643.Contig4	186 1685 hypothetical protein ARALYDRAFT_323856 [Arabidopsis lyrata subsp. lyrata] >gi|297322027|gb|EFH52448.1| hypothetical protein ARALYDRAFT_323856 [Arabidopsis lyrata subsp. lyrata]		3	409	0.851			CL3643.Contig4	comp27908_c0_seq2	-0.143478	0.96243
	CL1617.Contig4	141 1307 mitochondrial serine acetyltransferase [Thlaspi goesingense]		3	68	0.841			CL1617.Contig4	comp23534_c0_seq7	-1.97106	0.288943
	CL12963.Contig1	143 883 ribonuclease T2 family protein [Arabidopsis lyrata subsp. lyrata] >gi|297338637|gb|EFH69054.1| ribonuclease T2 family protein [Arabidopsis lyrata subsp. lyrata]	CL12963.Contig2	4	95	0.291	*	-	CL12963.Contig1	comp30065_c0_seq5	2.79164	0.00494883
	CL1362.Contig2	2 328 hypothetical protein ARALYDRAFT_482625 [Arabidopsis lyrata subsp. lyrata] >gi|297327284|gb|EFH57704.1| hypothetical protein ARALYDRAFT_482625 [Arabidopsis lyrata subsp. lyrata]		4	230	0.879			CL1362.Contig2	comp80529_c0_seq1	-0.11525	1
	CL6086.Contig1	67 762 plant UBX domain-containing protein 3 [Arabidopsis lyrata subsp. lyrata] >gi|297313622|gb|EFH44045.1| plant UBX domain-containing protein 3 [Arabidopsis lyrata subsp. lyrata]		10	303	0.779			CL6086.Contig1	comp26526_c0_seq1	-0.728216	0.678829
	CL12448.Contig2	100 1680 minus strand predicted protein [Arabidopsis lyrata subsp. lyrata] >gi|297328045|gb|EFH58464.1| predicted protein [Arabidopsis lyrata subsp. lyrata]		6	146	1.278	*	+	CL12448.Contig2	comp83960_c0_seq1	0.79164	0.889098
	CL9841.Contig1	38 757 minus strand hypothetical protein ARALYDRAFT_316436 [Arabidopsis lyrata subsp. lyrata] >gi|297333413|gb|EFH63831.1| hypothetical protein ARALYDRAFT_316436 [Arabidopsis lyrata subsp. lyrata]		2	61	1.622			CL9841.Contig1	comp26214_c0_seq1	-3.95559	7.57e-05	-
	Unigene20348	3 1211 minus strand uncharacterized protein [Arabidopsis thaliana] >gi|15146232|gb|AAK83599.1| At1g65900/F12P19_7 [Arabidopsis thaliana] >gi|19699144|gb|AAL90938.1| At1g65900/F12P19_7 [Arabidopsis thaliana] >gi|332196317|gb|AEE34438.1| uncharact		10	306	0.64	*	-	Unigene20348	comp30214_c0_seq1	0.808319	0.460787
	CL8676.Contig1	140 1276 minus strand trehalose-6-phosphate synthase, putative [Brassica oleracea]	CL8676.Contig2	4	93	1.083			CL8676.Contig1	comp31252_c0_seq4	3.10185	0.000250124	+
	CL414.Contig1	23 1819 enhanced disease susceptibility 1 [Arabidopsis lyrata subsp. lyrata] >gi|297323433|gb|EFH53854.1| enhanced disease susceptibility 1 [Arabidopsis lyrata subsp. lyrata]	CL414.Contig2	2	43	1.474			CL414.Contig1	comp30083_c0_seq8	31.9733	0.0489753
	CL6043.Contig2	71 655 minus strand ARD-like protein [Brassica juncea]		2	58	1.631			CL6043.Contig2	comp28115_c0_seq1	-0.910147	0.351361
	CL13719.Contig1	221 1900 minus strand cytosolic phosphoglucose isomerase [Arabidopsis thaliana]		9	240	1.36	*	+	CL13719.Contig1	comp28904_c0_seq1	-0.975382	0.293931
	Unigene1481	103 2535 minus strand hypothetical protein ARALYDRAFT_488536 [Arabidopsis lyrata subsp. lyrata] >gi|297319628|gb|EFH50050.1| hypothetical protein ARALYDRAFT_488536 [Arabidopsis lyrata subsp. lyrata]		3	141	1.392			Unigene1481	comp24397_c0_seq1	-0.695315	0.647105
	Unigene17587	2 196 hypothetical protein ARALYDRAFT_311263 [Arabidopsis lyrata subsp. lyrata] >gi|297337884|gb|EFH68301.1| hypothetical protein ARALYDRAFT_311263 [Arabidopsis lyrata subsp. lyrata]		3	70	1.265			Unigene17587	comp32070_c2_seq2	-1.42132	0.127103
	CL1723.Contig2	110 2047 minus strand DnaJ homolog subfamily C member 2 [Arabidopsis thaliana] >gi|332641527|gb|AEE75048.1| DnaJ homolog subfamily C member 2 [Arabidopsis thaliana]	Unigene27971	3	48	1.099			CL1723.Contig2	comp31271_c0_seq4	-1.51937	0.0847435
	CL4589.Contig1	109 936 hypothetical protein ARALYDRAFT_488714 [Arabidopsis lyrata subsp. lyrata] >gi|297319728|gb|EFH50150.1| hypothetical protein ARALYDRAFT_488714 [Arabidopsis lyrata subsp. lyrata]		5	169	0.416	*	-	CL4589.Contig1	comp24657_c0_seq1	-1.25567	0.185742
	CL10110.Contig1	61 1323 minus strand hypothetical protein ARALYDRAFT_888076 [Arabidopsis lyrata subsp. lyrata] >gi|297338299|gb|EFH68716.1| hypothetical protein ARALYDRAFT_888076 [Arabidopsis lyrata subsp. lyrata]		2	137	1.704			CL10110.Contig1	comp24392_c0_seq2	-0.0435531	1
	CL2825.Contig2	3 1262 minus strand SKU5 similar 5 protein [Arabidopsis thaliana] >gi|6573725|gb|AAF17645.1|AC009978_21 T23E18.10 [Arabidopsis thaliana] >gi|222423158|dbj|BAH19558.1| AT1G76160 [Arabidopsis thaliana] >gi|332197683|gb|AEE35804.1| SKU5 similar 5 p		7	283	1.054			CL2825.Contig2	comp27877_c0_seq4	34.1818	3.07e-05	+
	Unigene7933	31 312 minus strand calcium-binding EF-hand-containing protein [Arabidopsis thaliana] >gi|3128177|gb|AAC16081.1| expressed protein [Arabidopsis thaliana] >gi|330255313|gb|AEC10407.1| calcium-binding EF-hand-containing protein [Arabidopsis thalia		2	56	1.77			Unigene7933	comp46260_c0_seq1	1.74584	0.148826
	CL1733.Contig1	2 454 minus strand predicted protein [Arabidopsis lyrata subsp. lyrata] >gi|297309001|gb|EFH39426.1| predicted protein [Arabidopsis lyrata subsp. lyrata]	CL1733.Contig2 CL1733.Contig3	2	104	1.342			CL1733.Contig1	comp26138_c0_seq1	0.474013	0.724456
	CL4043.Contig1	117 656 adenylate kinase [Arabidopsis lyrata subsp. lyrata] >gi|297311626|gb|EFH42050.1| adenylate kinase [Arabidopsis lyrata subsp. lyrata]		5	143	0.886			CL4043.Contig1	comp12338_c0_seq1	-0.141578	0.956499
	CL7402.Contig2	177 1283 unnamed protein product [Thellungiella halophila]		4	236	0.712			CL7402.Contig2	comp10555_c1_seq1	-1.66779	0.151889
	Unigene14093	147 590 minus strand hypothetical protein ARALYDRAFT_481805 [Arabidopsis lyrata subsp. lyrata] >gi|297326858|gb|EFH57278.1| hypothetical protein ARALYDRAFT_481805 [Arabidopsis lyrata subsp. lyrata]		7	308	0.688	*	-	Unigene14093	comp24064_c0_seq1	-0.454185	1
	CL7174.Contig1	107 1099 minus strand peroxidase 49 [Arabidopsis thaliana] >gi|26397550|sp|O23237.2|PER49_ARATH RecName: Full=Peroxidase 49; Short=Atperox P49; AltName: Full=ATP31; Flags: Precursor >gi|17530562|gb|AAL40848.1|AF452384_1 class III peroxidase ATP3		14	698	0.438	*	-	CL7174.Contig1	comp24301_c0_seq2	3.54473	0.000964887	+
	CL1520.Contig1	143 997 minus strand hypothetical protein ARALYDRAFT_495412 [Arabidopsis lyrata subsp. lyrata] >gi|297310075|gb|EFH40499.1| hypothetical protein ARALYDRAFT_495412 [Arabidopsis lyrata subsp. lyrata]	CL1520.Contig3	10	543	0.818			CL1520.Contig1	comp23389_c0_seq1	-0.150257	0.976623
	CL11361.Contig1	3 1100 unnamed protein product [Thellungiella halophila]		5	74	1.737	*	+	CL11361.Contig1	comp30310_c0_seq4	-0.863367	0.409483
	CL13529.Contig1	98 1954 phosphoglucosamine mutase family protein [Arabidopsis thaliana] >gi|332005057|gb|AED92440.1| phosphoglucosamine mutase family protein [Arabidopsis thaliana]		4	136	0.848			CL13529.Contig1	comp9824_c0_seq2	-32.781	0.00591794
	Unigene22434	1 249 beta-fructofuranosidase, insoluble isoenzyme CWINV3 [Arabidopsis thaliana] >gi|332195067|gb|AEE33188.1| beta-fructofuranosidase, insoluble isoenzyme CWINV3 [Arabidopsis thaliana]		4	59	0.566	*	-	Unigene22434	comp25428_c0_seq1	0.844979	0.478904
	CL7176.Contig1	82 870 carboxylesterase [Arabidopsis thaliana] >gi|332659189|gb|AEE84589.1| carboxylesterase [Arabidopsis thaliana]	CL7176.Contig2	2	62	0.832			CL7176.Contig1	comp36377_c0_seq1	1.49566	0.111054
	CL3587.Contig3	93 917 minus strand 20S proteasome subunit PAF1 [Arabidopsis thaliana]		10	425	0.744	*	-	CL3587.Contig3	comp64596_c0_seq1	1.3766	0.586561
	Unigene29338	1 426 hypothetical protein ARALYDRAFT_483257 [Arabidopsis lyrata subsp. lyrata] >gi|297327633|gb|EFH58053.1| hypothetical protein ARALYDRAFT_483257 [Arabidopsis lyrata subsp. lyrata]	Unigene29339	10	430	1.055			Unigene29338	comp31391_c0_seq17	-0.300615	0.867913
	Unigene24015	59 280 NEDD8-like protein RUB1 [Arabidopsis thaliana] >gi|302393813|sp|Q9SHE7.3|RUB1_ARATH RecName: Full=Ubiquitin-NEDD8-like protein RUB1; Contains: RecName: Full=Ubiquitin; Contains: RecName: Full=NEDD8-like protein RUB1; AltName: Full=Ubiquiti	Unigene26885 Unigene26886	2	111	1.629	*	+	Unigene24015	comp23780_c0_seq5	33.2513	0.00108402
	Unigene19189	2 985 minus strand translocation protein SEC63 [Arabidopsis thaliana] >gi|186496567|ref|NP_001031306.2| translocation protein SEC63 [Arabidopsis thaliana] >gi|186496571|ref|NP_001117623.1| translocation protein SEC63 [Arabidopsis thaliana] >gi|3		5	119	1.17			Unigene19189	comp29153_c4_seq1	0.206678	1
	CL4463.Contig1	3 764 minus strand putative protein [Arabidopsis thaliana]		3	112	0.909			CL4463.Contig1	comp30749_c0_seq6	-0.0506123	1
	CL6301.Contig1	199 753 minus strand RUB1-conjugation enzyme [Brassica juncea]	CL6301.Contig5 CL6301.Contig6 CL6301.Contig8 CL13965.Contig1 Unigene25734	2	92	0.838			CL6301.Contig1	comp30661_c0_seq3	-0.174901	0.948145
	CL1149.Contig1	93 863 hypothetical protein ARALYDRAFT_480966 [Arabidopsis lyrata subsp. lyrata] >gi|297324375|gb|EFH54795.1| hypothetical protein ARALYDRAFT_480966 [Arabidopsis lyrata subsp. lyrata]		6	224	1.327			CL1149.Contig1	comp30078_c0_seq1	0.031729	1
	CL5215.Contig1	77 433 60S ribosomal protein L31 [Arabidopsis lyrata subsp. lyrata] >gi|297315456|gb|EFH45879.1| 60S ribosomal protein L31 [Arabidopsis lyrata subsp. lyrata]		2	106	1.454			CL5215.Contig1	comp15872_c0_seq2	-32.7666	0.00591794
	CL9006.Contig1	104 385 minus strand predicted protein [Arabidopsis lyrata subsp. lyrata] >gi|297321398|gb|EFH51819.1| predicted protein [Arabidopsis lyrata subsp. lyrata]		3	241	1.107			CL9006.Contig1	comp29779_c0_seq1	1.30988	0.159202
	CL634.Contig2	2 307 minus strand hypothetical protein ARALYDRAFT_492992 [Arabidopsis lyrata subsp. lyrata] >gi|297313817|gb|EFH44240.1| hypothetical protein ARALYDRAFT_492992 [Arabidopsis lyrata subsp. lyrata]		3	86	0.715			CL634.Contig2	comp24186_c0_seq1	1.62391	0.0643868
	CL786.Contig1	1 1626 aminopeptidase M1 [Arabidopsis thaliana] >gi|17473511|gb|AAL38379.1| AT4g33090/F4I10_20 [Arabidopsis thaliana] >gi|24209879|gb|AAN41401.1| aminopeptidase M [Arabidopsis thaliana] >gi|29028734|gb|AAO64746.1| At4g33090/F4I10_20 [Arabidopsis		12	312	1.313			CL786.Contig1	comp29106_c0_seq1	0.420997	0.769436
	Unigene393	71 1948 minus strand EMB1211 [Arabidopsis lyrata subsp. lyrata] >gi|297317851|gb|EFH48273.1| EMB1211 [Arabidopsis lyrata subsp. lyrata]		3	63	1.161			Unigene393	comp32239_c0_seq14	0.600868	0.863482
	Unigene960	34 1101 minus strand ATPAP29/PAP29 [Arabidopsis lyrata subsp. lyrata] >gi|297310674|gb|EFH41098.1| ATPAP29/PAP29 [Arabidopsis lyrata subsp. lyrata]		4	67	1.028			Unigene960	comp18776_c0_seq3	-3.01702	0.00135711
	Unigene3007	2 1048 argininosuccinate synthase [Arabidopsis thaliana] >gi|78099761|sp|Q9SZX3.3|ASSY_ARATH RecName: Full=Argininosuccinate synthase, chloroplastic; AltName: Full=Citrulline--aspartate ligase; Flags: Precursor >gi|332659568|gb|AEE84968.1| argini		7	237	1.477			Unigene3007	comp75783_c0_seq1	-0.945325	0.916934
	CL3233.Contig2	315 3116 minus strand clathrin interactor EPSIN 2 [Arabidopsis thaliana] >gi|30689274|ref|NP_850387.1| clathrin interactor EPSIN 2 [Arabidopsis thaliana] >gi|42571203|ref|NP_973675.1| clathrin interactor EPSIN 2 [Arabidopsis thaliana] >gi|751165		4	266	0.853			CL3233.Contig2	comp27780_c0_seq1	-1.37754	0.110114
	CL5103.Contig10	125 1066 minus strand hypothetical protein ARALYDRAFT_489058 [Arabidopsis lyrata subsp. lyrata] >gi|297319881|gb|EFH50303.1| hypothetical protein ARALYDRAFT_489058 [Arabidopsis lyrata subsp. lyrata]	CL5103.Contig3 CL5103.Contig5 CL5103.Contig6	2	164	1.864			CL5103.Contig10	comp23207_c0_seq1	1.08115	0.453423
	CL3941.Contig1	48 1232 minus strand hypothetical protein ARALYDRAFT_484065 [Arabidopsis lyrata subsp. lyrata] >gi|297322590|gb|EFH53011.1| hypothetical protein ARALYDRAFT_484065 [Arabidopsis lyrata subsp. lyrata]		5	200	1.206			CL3941.Contig1	comp28716_c0_seq1	0.842959	0.406784
	Unigene5971	17 367 hypothetical protein ARALYDRAFT_473075 [Arabidopsis lyrata subsp. lyrata] >gi|297336624|gb|EFH67041.1| hypothetical protein ARALYDRAFT_473075 [Arabidopsis lyrata subsp. lyrata]		2	42	0.669			Unigene5971	comp29309_c0_seq1	-0.868284	0.406779
	Unigene29552	1 384 hypothetical protein ARALYDRAFT_476207 [Arabidopsis lyrata subsp. lyrata] >gi|297334635|gb|EFH65053.1| hypothetical protein ARALYDRAFT_476207 [Arabidopsis lyrata subsp. lyrata]		3	77	1.375			Unigene29552	comp28513_c1_seq2	0.416108	0.736385
	Unigene19111	1 609 minus strand prefoldin subunit family protein [Arabidopsis lyrata subsp. lyrata] >gi|297338020|gb|EFH68437.1| prefoldin subunit family protein [Arabidopsis lyrata subsp. lyrata]		2	36	0.871			Unigene19111	comp21484_c1_seq1	0.598995	0.84682
	CL3633.Contig2	106 441 spiral1 [Brassica juncea]		8	240	0.891			CL3633.Contig2	comp117836_c0_seq1	0.206678	1
	Unigene26413	149 1213 minus strand unknown protein [Arabidopsis thaliana] >gi|23197674|gb|AAN15364.1| unknown protein [Arabidopsis thaliana]		5	109	1.32			Unigene26413	comp28264_c0_seq1	0.15248	0.949814
	CL11786.Contig1	362 583 minus strand chloroplast RNA-binding protein 33 [Arabidopsis thaliana] >gi|681910|dbj|BAA06522.1| RNA-binding protein cp33 [Arabidopsis thaliana] >gi|4886289|emb|CAB43448.1| RNA-binding protein cp33 precursor [Arabidopsis thaliana] >gi|1		4	180	1.141			CL11786.Contig1	comp61362_c0_seq1	0.206678	1
	CL7481.Contig1	3 989 minus strand hypothetical protein ARALYDRAFT_473479 [Arabidopsis lyrata subsp. lyrata] >gi|297339591|gb|EFH70008.1| hypothetical protein ARALYDRAFT_473479 [Arabidopsis lyrata subsp. lyrata]		6	243	0.422	*	-	CL7481.Contig1	comp74606_c0_seq1	-4.01571	0.0299205
	CL7185.Contig2	1 768 hypothetical protein ARALYDRAFT_480759 [Arabidopsis lyrata subsp. lyrata] >gi|297332018|gb|EFH62437.1| hypothetical protein ARALYDRAFT_480759 [Arabidopsis lyrata subsp. lyrata]		2	74	0.882			CL7185.Contig2	comp27370_c0_seq4	-0.530288	0.812228
	CL6103.Contig1	109 936 minus strand chloroplast acetyl-CoA carboxylase biotin-containing subunit [Brassica oleracea]	CL6103.Contig2	3	58	0.98			CL6103.Contig1	comp26361_c0_seq2	-32.7666	0.00591794
	CL5272.Contig8	339 1196 minus strand uncharacterized protein [Arabidopsis thaliana] >gi|332007166|gb|AED94549.1| uncharacterized protein [Arabidopsis thaliana]		6	98	0.964			CL5272.Contig8	comp27464_c0_seq1	0.0258957	1
	Unigene22491	197 1228 minus strand hypothetical protein ARALYDRAFT_487908 [Arabidopsis lyrata subsp. lyrata] >gi|297319310|gb|EFH49732.1| hypothetical protein ARALYDRAFT_487908 [Arabidopsis lyrata subsp. lyrata]		3	205	0.639			Unigene22491	comp26601_c0_seq1	1.50278	0.412087
	CL1106.Contig3	1 2613 minus strand ATP binding protein [Arabidopsis lyrata subsp. lyrata] >gi|297338354|gb|EFH68771.1| ATP binding protein [Arabidopsis lyrata subsp. lyrata]		6	280	1.5			CL1106.Contig3	comp32064_c0_seq1	0.069968	1
	CL11918.Contig1	2 1108 minus strand HEAT SHOCK PROTEIN 89.1 [Arabidopsis thaliana] >gi|332641081|gb|AEE74602.1| HEAT SHOCK PROTEIN 89.1 [Arabidopsis thaliana]		2	81	1.319			CL11918.Contig1	comp61164_c0_seq1	-1.79332	0.586561
	Unigene2146	65 1501 minus strand hypothetical protein ARALYDRAFT_895270 [Arabidopsis lyrata subsp. lyrata] >gi|297334801|gb|EFH65219.1| hypothetical protein ARALYDRAFT_895270 [Arabidopsis lyrata subsp. lyrata]		10	322	0.911			Unigene2146	comp27332_c0_seq1	-1.30023	0.139691
	CL8554.Contig2	199 714 uncharacterized protein [Arabidopsis thaliana] >gi|15081622|gb|AAK82466.1| AT3g07470/F21O3_18 [Arabidopsis thaliana] >gi|27363316|gb|AAO11577.1| At3g07470/F21O3_18 [Arabidopsis thaliana] >gi|332641026|gb|AEE74547.1| uncharacterized protei		12	424	0.677	*	-	CL8554.Contig2	comp21539_c0_seq2	-2.01571	0.461399
	CL1033.Contig4	1 717 minus strand hypothetical protein ARALYDRAFT_489971 [Arabidopsis lyrata subsp. lyrata] >gi|297320528|gb|EFH50950.1| hypothetical protein ARALYDRAFT_489971 [Arabidopsis lyrata subsp. lyrata]		3	100	2.425			CL1033.Contig4	comp32192_c0_seq2	-0.0314818	1
	CL6747.Contig1	1 291 ubiquitin-40S ribosomal protein S27a-3 [Arabidopsis thaliana] >gi|302393706|sp|P59233.2|R27AC_ARATH RecName: Full=Ubiquitin-40S ribosomal protein S27a-3; Contains: RecName: Full=Ubiquitin; Contains: RecName: Full=40S ribosomal protein S27a-	Unigene20059 Unigene20060	8	110	1.161			CL6747.Contig1	comp23405_c2_seq1	1.3246	0.139691
	Unigene25950	139 1467 minus strand hypothetical protein ARALYDRAFT_471096 [Arabidopsis lyrata subsp. lyrata] >gi|297335615|gb|EFH66032.1| hypothetical protein ARALYDRAFT_471096 [Arabidopsis lyrata subsp. lyrata]		3	68	1.12			Unigene25950	comp29693_c0_seq2	33.1082	0.00170759
	CL7753.Contig3	3 998 beta-ketoacyl-ACP synthetase 2 [Brassica napus]		3	92	0.728			CL7753.Contig3	comp18467_c0_seq1	1.3766	0.543022
	Unigene25451	111 1265 minus strand 26S proteasome regulatory subunit N9 [Arabidopsis thaliana] >gi|32700038|gb|AAP86669.1| 26S proteasome subunit RPN9b [Arabidopsis thaliana] >gi|332658724|gb|AEE84124.1| 26S proteasome regulatory subunit N9 [Arabidopsis thal		3	68	1.092			Unigene25451	comp14911_c1_seq1	-0.442825	0.876596
	Unigene24148	27 1094 Xylem cysteine proteinase 1 [Arabidopsis thaliana] >gi|71153408|sp|O65493.1|XCP1_ARATH RecName: Full=Xylem cysteine proteinase 1; Short=AtXCP1; Flags: Precursor >gi|6708181|gb|AAF25831.1|AF191027_1 papain-type cysteine endopeptidase XCP1		4	107	0.566	*	-	Unigene24148	comp27347_c2_seq1	1.92734	0.0233013
	CL12745.Contig1	70 1731 minus strand At1g11580/T23J18_33 [Arabidopsis lyrata subsp. lyrata] >gi|297335718|gb|EFH66135.1| At1g11580/T23J18_33 [Arabidopsis lyrata subsp. lyrata]		7	222	0.858			CL12745.Contig1	comp33163_c0_seq1	2.62523	0.00164015
	CL4799.Contig1	1 1458 EPS15 homology domain 1 protein [Arabidopsis thaliana] >gi|79313303|ref|NP_001030731.1| EPS15 homology domain 1 protein [Arabidopsis thaliana] >gi|222424046|dbj|BAH19984.1| AT3G20290 [Arabidopsis thaliana] >gi|332642838|gb|AEE76359.1| EPS1		3	40	1.113			CL4799.Contig1	comp30553_c0_seq3	1.1725	0.287536
	CL6121.Contig1	2 2200 minus strand hypothetical protein ARALYDRAFT_472328 [Arabidopsis lyrata subsp. lyrata] >gi|297336257|gb|EFH66674.1| hypothetical protein ARALYDRAFT_472328 [Arabidopsis lyrata subsp. lyrata]	CL6121.Contig2 CL6121.Contig3 CL6121.Contig4 CL6121.Contig5 CL6121.Contig6	3	74	1.454			CL6121.Contig1	comp31646_c0_seq3	-1.16144	0.650152
	Unigene30073	3 641 trypsin inhibitor propeptide [Brassica oleracea]		3	89	3.711	*	+	Unigene30073	comp34646_c0_seq1	7.20103	2.16e-08	+
	CL1149.Contig2	93 863 hypothetical protein ARALYDRAFT_480966 [Arabidopsis lyrata subsp. lyrata] >gi|297324375|gb|EFH54795.1| hypothetical protein ARALYDRAFT_480966 [Arabidopsis lyrata subsp. lyrata]		9	265	1.217	*	+	CL1149.Contig2	comp30078_c0_seq2	0.163311	0.947345
	CL1311.Contig1	173 1432 minus strand hypothetical protein ARALYDRAFT_488820 [Arabidopsis lyrata subsp. lyrata] >gi|297317718|gb|EFH48140.1| hypothetical protein ARALYDRAFT_488820 [Arabidopsis lyrata subsp. lyrata]	CL1311.Contig2	2	106	1.273			CL1311.Contig1	comp31707_c2_seq2	0.0723445	1
	CL2266.Contig1	3 1460 Regulator of Vps4 activity in the MVB pathway protein [Arabidopsis thaliana] >gi|5091622|gb|AAD39610.1|AC007454_9 F23M19.10 [Arabidopsis thaliana] >gi|332193567|gb|AEE31688.1| Regulator of Vps4 activity in the MVB pathway protein [Arabidop	CL2266.Contig2	6	183	1.094			CL2266.Contig1	comp28680_c0_seq5	31.8947	0.0489753
	CL3864.Contig1	64 1038 minus strand predicted protein [Arabidopsis lyrata subsp. lyrata] >gi|297315228|gb|EFH45651.1| predicted protein [Arabidopsis lyrata subsp. lyrata]		18	560	0.679	*	-	CL3864.Contig1	comp20935_c0_seq1	-1.26281	0.171614
	CL7056.Contig1	4 966 minus strand UDP-D-apiose/UDP-D-xylose synthase 2 [Arabidopsis lyrata subsp. lyrata] >gi|297338288|gb|EFH68705.1| UDP-D-apiose/UDP-D-xylose synthase 2 [Arabidopsis lyrata subsp. lyrata]		8	215	0.87			CL7056.Contig1	comp30697_c0_seq2	1.42978	0.100252
	Unigene230	1 1458 mitochondrial chaperonin (HSP60) [Arabidopsis thaliana]		3	826	1.308	*	+	Unigene230	comp16600_c0_seq1	0.154211	1
	Unigene26864	104 496 tubulin beta-4 chain [Arabidopsis lyrata subsp. lyrata] >gi|297309423|gb|EFH39847.1| tubulin beta-4 chain [Arabidopsis lyrata subsp. lyrata]		2	798	1.128	*		Unigene26864	comp27748_c0_seq1	2.69853	0.00353296
	Unigene1958	2 400 dihydroxy-acid dehydratase [Arabidopsis thaliana] >gi|332643314|gb|AEE76835.1| dihydroxy-acid dehydratase [Arabidopsis thaliana]		3	41	0.717			Unigene1958	comp32047_c0_seq4	2.599	0.257553
	CL11253.Contig2	26 250 minus strand jasmonate inducible protein [Brassica napus]		3	132	3.897			CL11253.Contig2	comp20957_c0_seq1	2.88709	0.0029476
	Unigene8608	37 759 ATWHY2 [Arabidopsis lyrata subsp. lyrata] >gi|297334668|gb|EFH65086.1| ATWHY2 [Arabidopsis lyrata subsp. lyrata]		3	137	0.38			Unigene8608	comp24477_c0_seq1	-0.401005	0.840428
	CL508.Contig3	65 1333 minus strand putative calcium-binding protein, calreticulin [Arabidopsis thaliana]		10	1080	1.236			CL508.Contig3	comp30680_c0_seq6	1.40939	0.112197
	Unigene24802	2 892 minus strand hypothetical protein ARALYDRAFT_489803 [Arabidopsis lyrata subsp. lyrata] >gi|297320407|gb|EFH50829.1| hypothetical protein ARALYDRAFT_489803 [Arabidopsis lyrata subsp. lyrata]		2	49	1.778			Unigene24802	comp24708_c0_seq1	-0.52202	0.686313
	CL7165.Contig1	183 1196 minus strand hypothetical protein ARALYDRAFT_487751 [Arabidopsis lyrata subsp. lyrata] >gi|297317204|gb|EFH47626.1| hypothetical protein ARALYDRAFT_487751 [Arabidopsis lyrata subsp. lyrata]	CL7165.Contig2	4	85	0.984			CL7165.Contig1	comp29979_c0_seq7	34.7874	1.86e-06	+
	Unigene19215	93 365 minus strand RecName: Full=Acyl-CoA-binding protein; Short=ACBP >gi|509265|emb|CAA54390.1| acyl-CoA binding protein [Brassica napus]		3	64	1.543	*	+	Unigene19215	comp20649_c0_seq4	2.19818	0.0082969
	CL12018.Contig1	226 1008 predicted protein [Arabidopsis lyrata subsp. lyrata] >gi|297324074|gb|EFH54495.1| predicted protein [Arabidopsis lyrata subsp. lyrata]	CL12018.Contig2	4	78	1.135			CL12018.Contig1	comp22232_c0_seq1	0.0381237	1
	CL7162.Contig1	46 1029 minus strand peroxidase [Arabidopsis thaliana] >gi|25453196|sp|Q42580.1|PER21_ARATH RecName: Full=Peroxidase 21; Short=Atperox P21; AltName: Full=ATP2a/ATP2b; AltName: Full=PRXR5; Flags: Precursor >gi|1403138|emb|CAA66863.1| peroxidase A		4	153	0.964			CL7162.Contig1	comp22897_c0_seq1	-1.86011	0.0272413
	CL8165.Contig1	265 1374 minus strand eukaryotic translation initiation factor 2B family protein [Arabidopsis lyrata subsp. lyrata] >gi|297329552|gb|EFH59971.1| eukaryotic translation initiation factor 2B family protein [Arabidopsis lyrata subsp. lyrata]	CL8165.Contig2	5	183	0.879			CL8165.Contig1	comp26040_c0_seq2	-0.381646	0.780368
	CL2203.Contig1	2 1066 GroES-like zinc-binding alcohol dehydrogenase family protein [Arabidopsis thaliana] >gi|15982719|gb|AAL09729.1| AT5g63620/MBK5_9 [Arabidopsis thaliana] >gi|24797036|gb|AAN64530.1| At5g63620/MBK5_9 [Arabidopsis thaliana] >gi|332010394|gb|AE		3	45	0.729			CL2203.Contig1	comp116501_c0_seq1	0.206678	1
	Unigene19117	1 141 minus strand Ran BP2/NZF zinc finger-like protein [Arabidopsis thaliana] >gi|332006071|gb|AED93454.1| Ran BP2/NZF zinc finger-like protein [Arabidopsis thaliana]		2	125	0.713			Unigene19117	comp26233_c0_seq3	2.78519	0.0102723
	Unigene20546	101 1078 minus strand unnamed protein product [Thellungiella halophila]		2	96	1.005			Unigene20546	comp30395_c0_seq3	-1.27603	0.388716
	Unigene29788	3 647 RecName: Full=Glucose-1-phosphate adenylyltransferase small subunit, chloroplastic; AltName: Full=ADP-glucose pyrophosphorylase; AltName: Full=ADP-glucose synthase; AltName: Full=AGPase B; AltName: Full=Alpha-D-glucose-1-phosphate adenyl tr		5	136	1.959			Unigene29788	comp25658_c1_seq1	2.22048	0.0251893
	CL6783.Contig1	309 1400 unnamed protein product [Thellungiella halophila]	Unigene28654	21	650	0.819	*	-	CL6783.Contig1	comp924_c0_seq1	-31.1817	0.205076
	CL8271.Contig1	185 1714 RNA recognition motif-containing protein [Arabidopsis thaliana] >gi|79324963|ref|NP_001031566.1| RNA recognition motif-containing protein [Arabidopsis thaliana] >gi|13605916|gb|AAK32943.1|AF367357_1 AT4g00830/A_TM018A10_14 [Arabidopsis t	CL8271.Contig2	6	55	0.976			CL8271.Contig1	comp29097_c0_seq7	-31.7647	0.0686039
	Unigene28712	391 1323 minus strand hypothetical protein ARALYDRAFT_901221 [Arabidopsis lyrata subsp. lyrata] >gi|297326536|gb|EFH56956.1| hypothetical protein ARALYDRAFT_901221 [Arabidopsis lyrata subsp. lyrata]		5	322	1.004			Unigene28712	comp23906_c0_seq1	-0.688323	0.51431
	CL13224.Contig1	141 1757 putative protein [Arabidopsis thaliana] >gi|7270051|emb|CAB79866.1| putative protein [Arabidopsis thaliana]		2	56	1.983	*	+	CL13224.Contig1	comp32084_c0_seq16	1.25396	0.363195
	Unigene804	165 1316 hypothetical protein ARALYDRAFT_477488 [Arabidopsis lyrata subsp. lyrata] >gi|297330166|gb|EFH60585.1| hypothetical protein ARALYDRAFT_477488 [Arabidopsis lyrata subsp. lyrata]		11	531	1.017			Unigene804	comp23505_c0_seq5	-0.0820973	1
	Unigene25242	94 261 minus strand glutaredoxin-C4 [Arabidopsis thaliana] >gi|119370637|sp|Q8LFQ6.2|GRXC4_ARATH RecName: Full=Glutaredoxin-C4; Short=AtGrxC4 >gi|6735386|emb|CAB69043.1| glutaredoxin [Arabidopsis thaliana] >gi|25082927|gb|AAN72016.1| glutaredoxi	Unigene26798	3	30	0.821			Unigene25242	comp22331_c0_seq1	0.123262	0.987975
	Unigene403	227 3019 protein TIME FOR COFFEE [Arabidopsis thaliana] >gi|332643108|gb|AEE76629.1| protein TIME FOR COFFEE [Arabidopsis thaliana]		2	75	1.016			Unigene403	comp32203_c1_seq3	2.66291	0.0237045
	CL4.Contig1	143 1681 minus strand prolyl-tRNA synthetase [Arabidopsis thaliana] >gi|30695549|ref|NP_850736.1| prolyl-tRNA synthetase [Arabidopsis thaliana] >gi|6899922|emb|CAB71872.1| multifunctional aminoacyl-tRNA ligase-like protein [Arabidopsis thaliana]	CL4.Contig2	8	186	1.469			CL4.Contig1	comp31684_c0_seq1	-1.04366	0.252043
	CL7135.Contig2	2 1156 hypothetical protein ARALYDRAFT_477124 [Arabidopsis lyrata subsp. lyrata] >gi|297335094|gb|EFH65512.1| hypothetical protein ARALYDRAFT_477124 [Arabidopsis lyrata subsp. lyrata]	CL7135.Contig5	4	2016	1.765	*	+	CL7135.Contig2	comp75148_c0_seq1	0.528606	0.863482
	CL4544.Contig2	2 1075 tetratricopeptide repeat domain-containing protein [Arabidopsis thaliana] >gi|332661368|gb|AEE86768.1| tetratricopeptide repeat domain-containing protein [Arabidopsis thaliana]		3	76	1.019			CL4544.Contig2	comp59432_c0_seq1	3.13078	0.109003
	CL5171.Contig2	143 1321 minus strand MPK6 protein [Brassica napus]		3	50	0.77			CL5171.Contig2	comp28970_c0_seq1	-1.02231	0.409591
	CL9411.Contig1	166 2571 MRH5/SHV3 [Arabidopsis lyrata subsp. lyrata] >gi|297313382|gb|EFH43805.1| MRH5/SHV3 [Arabidopsis lyrata subsp. lyrata]	CL9411.Contig3	8	862	0.745	*	-	CL9411.Contig1	comp30746_c1_seq3	-1.20051	0.187748
	CL2436.Contig1	213 1334 minus strand nucleosome assembly protein 1;2 [Arabidopsis thaliana] >gi|330251791|gb|AEC06885.1| nucleosome assembly protein 1;2 [Arabidopsis thaliana]		3	693	0.76			CL2436.Contig1	comp29273_c3_seq2	-0.425385	0.746244
	CL3088.Contig1	77 1861 26S proteasome regulatory subunit N1 [Arabidopsis thaliana] >gi|75265911|sp|Q9SIV2.2|RPN1A_ARATH RecName: Full=26S proteasome non-ATPase regulatory subunit 2 1A; AltName: Full=26S proteasome regulatory subunit RPN1 A; Short=AtRPN1a; AltNa		9	277	1.406	*	+	CL3088.Contig1	comp18932_c1_seq1	0.113569	1
	CL12789.Contig1	72 1772 minus strand pyrophosphate--fructose-6-phosphate 1-phosphotransferase [Arabidopsis thaliana] >gi|17064794|gb|AAL32551.1| Similar to pyrophosphate-dependent phosphofuctokinase beta subunit [Arabidopsis thaliana] >gi|20259824|gb|AAM13259.1		14	494	1.145			CL12789.Contig1	comp29838_c0_seq2	-0.235968	0.896219
	CL3667.Contig1	475 2013 minus strand uncharacterized protein [Arabidopsis thaliana] >gi|332007166|gb|AED94549.1| uncharacterized protein [Arabidopsis thaliana]		5	481	0.958			CL3667.Contig1	comp31176_c0_seq10	-4.02132	7.59e-05	-
	CL11253.Contig1	1228 1626 myrosinase binding protein [Brassica napus]		4	86	2.502			CL11253.Contig1	comp25731_c0_seq1	3.95921	4.62e-06	+
	CL7358.Contig1	176 973 minus strand hypothetical protein ARALYDRAFT_897138 [Arabidopsis lyrata subsp. lyrata] >gi|297328476|gb|EFH58895.1| hypothetical protein ARALYDRAFT_897138 [Arabidopsis lyrata subsp. lyrata]		4	55	1.061			CL7358.Contig1	comp25486_c0_seq1	35.0156	6.36e-07	+
	CL2761.Contig1	67 1341 minus strand hypothetical protein ARALYDRAFT_491495 [Arabidopsis lyrata subsp. lyrata] >gi|297315118|gb|EFH45541.1| hypothetical protein ARALYDRAFT_491495 [Arabidopsis lyrata subsp. lyrata]		3	167	0.605			CL2761.Contig1	comp30986_c0_seq5	3.0243	0.141495
	CL7761.Contig3	2 967 hypothetical protein ARALYDRAFT_474319 [Arabidopsis lyrata subsp. lyrata] >gi|297340190|gb|EFH70607.1| hypothetical protein ARALYDRAFT_474319 [Arabidopsis lyrata subsp. lyrata]	Unigene29666	9	361	1.018			CL7761.Contig3	comp36499_c0_seq1	-1.53029	0.249803
	CL9724.Contig1	109 1215 minus strand hypothetical protein ARALYDRAFT_912415 [Arabidopsis lyrata subsp. lyrata] >gi|297314746|gb|EFH45169.1| hypothetical protein ARALYDRAFT_912415 [Arabidopsis lyrata subsp. lyrata]		5	183	1.632			CL9724.Contig1	comp30544_c0_seq1	-0.0946802	1
	Unigene15507	65 565 AT4G36690 [Arabidopsis thaliana]		2	36	1.777			Unigene15507	comp26296_c0_seq3	-0.253017	0.903577
	CL11926.Contig1	9 1718 minus strand hypothetical protein ARALYDRAFT_912279 [Arabidopsis lyrata subsp. lyrata] >gi|297312626|gb|EFH43049.1| hypothetical protein ARALYDRAFT_912279 [Arabidopsis lyrata subsp. lyrata]		2	61	0.899			CL11926.Contig1	comp30349_c1_seq1	4.63247	1.17e-05	+
	CL8093.Contig1	3 851 minus strand BSD domain-containing protein [Arabidopsis thaliana] >gi|3850569|gb|AAC72109.1| ESTs gb|T21276, gb|T45403, and gb|AA586113 come from this gene [Arabidopsis thaliana] >gi|332189441|gb|AEE27562.1| BSD domain-containing protein [	CL8093.Contig3 CL8093.Contig4	2	99	1.228			CL8093.Contig1	comp28126_c0_seq5	0.303819	0.855499
	CL4477.Contig4	3 2318 minus strand ATSPS1F [Arabidopsis lyrata subsp. lyrata] >gi|297319825|gb|EFH50247.1| ATSPS1F [Arabidopsis lyrata subsp. lyrata]		13	287	1.127			CL4477.Contig4	comp30164_c0_seq4	-32.492	0.0136901
	CL741.Contig2	206 595 minus strand plasminogen activator inhibitor 1 RNA-binding protein; K13199 plasminogen activator inhibitor 1 RNA-binding protein		4	142	1.048			CL741.Contig2	comp17563_c0_seq1	1.46971	0.294209
	Unigene18743	50 817 minus strand peptidylprolyl isomerase-like protein [Arabidopsis thaliana]		15	538	0.661	*	-	Unigene18743	comp78350_c0_seq1	-0.530288	1
	CL5855.Contig2	208 1638 tetratricopeptide repeat domain-containing protein [Arabidopsis thaliana] >gi|44917447|gb|AAS49048.1| At3g16760 [Arabidopsis thaliana] >gi|50253544|gb|AAT71974.1| At3g16760 [Arabidopsis thaliana] >gi|332642341|gb|AEE75862.1| tetratricope		7	185	1.498	*	+	CL5855.Contig2	comp30813_c0_seq2	0.377587	0.780368
	CL9073.Contig2	107 619 RecName: Full=Peptidyl-prolyl cis-trans isomerase; Short=PPIase; AltName: Full=Cyclophilin; AltName: Full=Cyclosporin A-binding protein; AltName: Full=Rotamase		92	3150	1.016			CL9073.Contig2	comp19217_c0_seq1	1.68473	0.205076
	Unigene24754	207 1862 hypothetical protein ARALYDRAFT_489778 [Arabidopsis lyrata subsp. lyrata] >gi|297320392|gb|EFH50814.1| hypothetical protein ARALYDRAFT_489778 [Arabidopsis lyrata subsp. lyrata]		4	45	0.73			Unigene24754	comp26193_c0_seq1	1.68976	0.1318
	Unigene25123	102 776 uncharacterized protein [Arabidopsis thaliana] >gi|19310497|gb|AAL84982.1| AT3g08780/F17O14_25 [Arabidopsis thaliana] >gi|20908088|gb|AAM26727.1| AT3g08780/F17O14_25 [Arabidopsis thaliana] >gi|332641157|gb|AEE74678.1| uncharacterized prot		4	80	0.435			Unigene25123	comp27592_c0_seq1	1.11997	0.245028
	CL7466.Contig2	68 1021 minus strand rRNA 2&apos;-O-methyltransferase fibrillarin 2 [Arabidopsis thaliana] >gi|67461067|sp|Q94AH9.2|MD36A_ARATH RecName: Full=Mediator of RNA polymerase II transcription subunit 36a; AltName: Full=Fibrillarin-like protein 2; AltN		7	287	1.336			CL7466.Contig2	comp30447_c0_seq1	-0.270275	0.907146
	CL6961.Contig10	104 901 minus strand Pre-mRNA-splicing factor SF2 OS=Arabidopsis thaliana GN=SF2 PE=1 SV=1	CL6961.Contig11 CL6961.Contig1 CL6961.Contig3 CL6961.Contig4 CL6961.Contig7 CL6961.Contig8	18	468	1.163	*		CL6961.Contig10	comp28401_c1_seq16	-2.60527	0.0135417
	CL7304.Contig2	1 1308 minus strand chloroplast biotin carboxylase [Brassica napus]		5	161	1.067			CL7304.Contig2	comp27534_c0_seq1	0.746445	0.516666
	Unigene20076	63 542 jasmonate inducible protein [Brassica napus]		10	199	3.641	*	+	Unigene20076	comp25731_c0_seq2	4.19081	1.16e-05	+
	CL7290.Contig2	245 826 minus strand adenine phosphoribosyltransferase [Brassica napus]	CL7290.Contig3	2	340	0.961			CL7290.Contig2	comp12115_c0_seq1	-0.184656	0.929536
	CL10898.Contig1	106 1482 minus strand nuclear transport factor 2 and RNA recognition motif domain-containing protein [Arabidopsis thaliana] >gi|17063173|gb|AAL32982.1| AT5g60980/MSL3_100 [Arabidopsis thaliana] >gi|27764908|gb|AAO23575.1| At5g60980/MSL3_100 [Ara		4	264	0.811			CL10898.Contig1	comp25186_c0_seq2	0.0665659	1
	Unigene29689	100 702 minus strand water soluble chlorophyll protein [Brassica oleracea var. gemmifera]		35	1190	1.045			Unigene29689	comp31370_c2_seq1	-0.0423272	1
	Unigene29697	116 1639 minus strand unnamed protein product [Thellungiella halophila]		37	792	0.86			Unigene29697	comp29575_c0_seq2	-2.86968	0.00348621
	Unigene29698	71 355 minus strand uncharacterized protein [Arabidopsis thaliana] >gi|332657751|gb|AEE83151.1| uncharacterized protein [Arabidopsis thaliana]		3	99	0.987			Unigene29698	comp54832_c0_seq1	0.961565	0.708699
	CL5172.Contig2	153 926 minus strand unnamed protein product [Thellungiella halophila]	CL5172.Contig3	2	143	1.092			CL5172.Contig2	comp26462_c1_seq2	-0.829848	0.609414
	CL2847.Contig2	92 919 minus strand gamma carbonic anhydrase 2 [Arabidopsis thaliana] >gi|75169075|sp|Q9C6B3.1|GCA2_ARATH RecName: Full=Gamma carbonic anhydrase 2, mitochondrial; Short=AtCA2; Short=GAMMA CA2; AltName: Full=Transcription factor APFI; Flags: Prec	CL2847.Contig3	5	216	0.74			CL2847.Contig2	comp28371_c0_seq1	0.536111	0.708699
	CL1667.Contig2	9 605 leucine-rich repeat protein FLR1 [Arabidopsis lyrata subsp. lyrata] >gi|297330729|gb|EFH61148.1| leucine-rich repeat protein FLR1 [Arabidopsis lyrata subsp. lyrata]		7	311	0.491			CL1667.Contig2	comp30734_c0_seq1	-1.79332	0.141495
	Unigene26799	124 1851 Peptide-N4-(N-acetyl-beta-glucosaminyl)asparagine amidase A protein [Arabidopsis thaliana] >gi|13605891|gb|AAK32931.1|AF367344_1 AT5g05480/MOP10_2 [Arabidopsis thaliana] >gi|24111305|gb|AAN46776.1| At5g05480/MOP10_2 [Arabidopsis thaliana		3	109	0.456			Unigene26799	comp29106_c0_seq1	0.420997	0.769436
	CL9460.Contig1	27 1994 RecName: Full=Acetolactate synthase 1, chloroplastic; AltName: Full=ALS I; AltName: Full=Acetohydroxy-acid synthase I; AltName: Full=Acetolactate synthase I; Flags: Precursor >gi|17772|emb|CAA77613.1| actohydroxyacid synthase I [Brassica		5	210	0.854			CL9460.Contig1	comp93802_c0_seq1	-0.623397	0.876596
	CL4030.Contig1	155 1105 korean-radish isoperoxidase [Raphanus sativus]		17	920	0.422	*	-	CL4030.Contig1	comp22036_c0_seq1	0.0315912	1
	CL1922.Contig1	187 1080 ureidoglycine aminohydrolase [Arabidopsis thaliana] >gi|296248910|gb|ADH04164.1| ureidoglycine aminohydrolase [Arabidopsis thaliana] >gi|332658443|gb|AEE83843.1| ureidoglycine aminohydrolase [Arabidopsis thaliana]	CL1922.Contig2	3	106	0.61			CL1922.Contig1	comp24670_c0_seq1	0.754166	0.509077
	CL2179.Contig1	1 1392 hypothetical protein ARALYDRAFT_477651 [Arabidopsis lyrata subsp. lyrata] >gi|297328162|gb|EFH58581.1| hypothetical protein ARALYDRAFT_477651 [Arabidopsis lyrata subsp. lyrata]		7	215	1.303	*	+	CL2179.Contig1	comp30360_c0_seq2	0.79164	0.456958
	Unigene6184	1 94 LEN=320; translated		3	112	0.688			Unigene6184	comp38745_c0_seq1	-1.66779	0.13901
	CL13998.Contig2	173 472 minus strand hypothetical protein ARALYDRAFT_479016 [Arabidopsis lyrata subsp. lyrata] >gi|297328795|gb|EFH59214.1| hypothetical protein ARALYDRAFT_479016 [Arabidopsis lyrata subsp. lyrata]		2	65	0.356			CL13998.Contig2	comp20395_c0_seq2	1.95241	0.205076
	Unigene10559	60 200 early nodulin-like protein 1 [Arabidopsis thaliana] >gi|109946411|gb|ABG48384.1| At5g53870 [Arabidopsis thaliana] >gi|332009038|gb|AED96421.1| early nodulin-like protein 1 [Arabidopsis thaliana]		3	40	0.56	*	-	Unigene10559	comp16714_c0_seq1	-4.01571	0.0299205
	CL9552.Contig2	134 2407 minus strand hypothetical protein ARALYDRAFT_473159 [Arabidopsis lyrata subsp. lyrata] >gi|297339411|gb|EFH69828.1| hypothetical protein ARALYDRAFT_473159 [Arabidopsis lyrata subsp. lyrata]		5	123	1.571	*	+	CL9552.Contig2	comp24165_c2_seq1	2.38582	0.00784455
	CL9354.Contig1	83 544 minus strand unnamed protein product [Thellungiella halophila]	CL9354.Contig2	8	151	1.255	*	+	CL9354.Contig1	comp31163_c1_seq1	0.474778	0.723541
	Unigene840	128 907 minus strand GF14 omega [Brassica napus]	Unigene2504 Unigene27157	4	411	1.462	*	+	Unigene840	comp30542_c3_seq2	1.67938	0.0529422
	CL9652.Contig1	214 792 hypothetical protein ARALYDRAFT_895569 [Arabidopsis lyrata subsp. lyrata] >gi|297333501|gb|EFH63919.1| hypothetical protein ARALYDRAFT_895569 [Arabidopsis lyrata subsp. lyrata]	CL9652.Contig2 CL9652.Contig3 CL9652.Contig4 CL9652.Contig5	2	46	0.892			CL9652.Contig1	comp32032_c3_seq8	-31.4685	0.139691
	Unigene25671	62 2347 minus strand Subtilase-like protein [Arabidopsis thaliana] >gi|330250891|gb|AEC05985.1| Subtilase-like protein [Arabidopsis thaliana]		20	605	0.798			Unigene25671	comp27819_c0_seq1	2.55677	0.00190295
	CL14726.Contig1	3 1796 minus strand PA-domain containing subtilase family protein [Arabidopsis thaliana] >gi|4938478|emb|CAB43837.1| proteinase-like protein [Arabidopsis thaliana] >gi|7269902|emb|CAB80995.1| AT4g30020 [Arabidopsis thaliana] >gi|22655014|gb|AAM9		5	187	0.866			CL14726.Contig1	comp30843_c0_seq14	3.70456	0.000285923	+
	CL261.Contig3	58 1011 minus strand diaminopimelate epimerase [Arabidopsis thaliana] >gi|75263858|sp|Q9LFG2.1|DAPF_ARATH RecName: Full=Diaminopimelate epimerase, chloroplastic; Short=DAP epimerase; Flags: Precursor >gi|6729509|emb|CAB67665.1| diaminopimelate e		3	108	1.129			CL261.Contig3	comp29138_c0_seq2	0.359256	1
	Unigene17757	1 258 minus strand ATP binding protein [Arabidopsis lyrata subsp. lyrata] >gi|297338354|gb|EFH68771.1| ATP binding protein [Arabidopsis lyrata subsp. lyrata]		2	53	0.987			Unigene17757	comp15689_c0_seq1	-1.01571	0.821569
	CL14403.Contig2	2 202 minus strand unnamed protein product [Thellungiella halophila]		3	75	1.021			CL14403.Contig2	comp28245_c0_seq1	-0.337122	0.856781
	CL11082.Contig3	268 3522 minus strand predicted protein [Arabidopsis lyrata subsp. lyrata] >gi|297331565|gb|EFH61984.1| predicted protein [Arabidopsis lyrata subsp. lyrata]		2	80	0.853			CL11082.Contig3	comp30354_c1_seq1	1.32129	0.131832
	CL8353.Contig1	68 1093 minus strand ribose-phosphate pyrophosphokinase 4 [Arabidopsis lyrata subsp. lyrata] >gi|297325850|gb|EFH56270.1| ribose-phosphate pyrophosphokinase 4 [Arabidopsis lyrata subsp. lyrata]	CL8353.Contig2 CL8353.Contig3 CL8353.Contig4 CL8353.Contig5	3	97	1.935			CL8353.Contig1	comp30116_c0_seq1	0.332209	0.842484
	Unigene6429	187 339 RecName: Full=Phospholipase D alpha 2; Short=PLD 2; AltName: Full=Choline phosphatase 2; AltName: Full=Phosphatidylcholine-hydrolyzing phospholipase D 2; Flags: Precursor >gi|3639087|gb|AAC78486.1| phospholipase D2 [Brassica oleracea var.		6	108	2.172			Unigene6429	comp31264_c1_seq1	5.28062	3.78e-09	+
	CL5699.Contig1	144 1046 hypothetical protein ARALYDRAFT_479390 [Arabidopsis lyrata subsp. lyrata] >gi|297328991|gb|EFH59410.1| hypothetical protein ARALYDRAFT_479390 [Arabidopsis lyrata subsp. lyrata]		2	49	1.315			CL5699.Contig1	comp25495_c0_seq1	0.578647	0.622173
	Unigene23993	78 776 minus strand RNA recognition motif-containing protein [Arabidopsis lyrata subsp. lyrata] >gi|297335834|gb|EFH66251.1| RNA recognition motif-containing protein [Arabidopsis lyrata subsp. lyrata]		2	103	1.241			Unigene23993	comp70418_c0_seq1	-1.53029	0.726169
	Unigene13679	81 1004 minus strand NmrA-like negative transcriptional regulator family protein [Arabidopsis thaliana] >gi|4914435|emb|CAB43638.1| NAD(P)H oxidoreductase, isoflavone reductase-like protein [Arabidopsis thaliana] >gi|7270906|emb|CAB80586.1| NAD(		4	127	0.412	*	-	Unigene13679	comp34764_c0_seq1	-0.383038	0.79106
	CL3234.Contig6	3 1808 minus strand ATGCN3 [Arabidopsis lyrata subsp. lyrata] >gi|297333716|gb|EFH64134.1| ATGCN3 [Arabidopsis lyrata subsp. lyrata]		6	165	0.988			CL3234.Contig6	comp27945_c0_seq2	-7.96203	0.000705527	-
	CL13336.Contig1	121 1416 minus strand glycine-rich protein [Arabidopsis thaliana] >gi|332661567|gb|AEE86967.1| glycine-rich protein [Arabidopsis thaliana]	CL13336.Contig2	10	224	0.882			CL13336.Contig1	comp27309_c0_seq2	-36.4372	4.42e-10	-
	CL3737.Contig1	21 1472 serine carboxypeptidase S28 family protein [Arabidopsis lyrata subsp. lyrata] >gi|297314877|gb|EFH45300.1| serine carboxypeptidase S28 family protein [Arabidopsis lyrata subsp. lyrata]	CL3737.Contig2	5	177	1.031			CL3737.Contig1	comp13741_c0_seq1	-0.793322	1
	CL242.Contig2	2 2419 minus strand pantothenate kinase 2 [Arabidopsis thaliana] >gi|334302844|sp|Q8L5Y9.2|PANK2_ARATH RecName: Full=Pantothenate kinase 2; AltName: Full=Pantothenic acid kinase 2 >gi|332660615|gb|AEE86015.1| pantothenate kinase 2 [Arabidopsis t	CL242.Contig3 CL242.Contig4	4	41	0.965			CL242.Contig2	comp32243_c0_seq2	0.20554	0.916934
	CL3421.Contig4	42 1079 minus strand unknown [Brassica rapa]		3	146	1.282			CL3421.Contig4	comp29328_c0_seq1	0.139936	1
	CL10633.Contig3	184 2049 minus strand hypothetical protein ARALYDRAFT_356181 [Arabidopsis lyrata subsp. lyrata] >gi|297314636|gb|EFH45059.1| hypothetical protein ARALYDRAFT_356181 [Arabidopsis lyrata subsp. lyrata]		2	158	0.767			CL10633.Contig3	comp27975_c1_seq1	2.66775	0.0136901
	CL11028.Contig1	83 1528 hypothetical protein ARALYDRAFT_908774 [Arabidopsis lyrata subsp. lyrata] >gi|297317150|gb|EFH47572.1| hypothetical protein ARALYDRAFT_908774 [Arabidopsis lyrata subsp. lyrata]		3	84	0.673			CL11028.Contig1	comp11583_c0_seq1	0.134648	0.959456
	Unigene28650	39 1061 SLL2-S9-protein [Brassica rapa]		7	101	0.78	*	-	Unigene28650	comp27455_c0_seq1	32.3396	0.0184434
	Unigene22583	103 444 minus strand RecName: Full=Probable beta-D-xylosidase 6; Short=AtBXL6; Flags: Precursor >gi|7671447|emb|CAB89387.1| beta-xylosidase-like protein [Arabidopsis thaliana] >gi|15982753|gb|AAL09717.1| AT5g10560/F12B17_90 [Arabidopsis thaliana		3	115	0.239	*	-	Unigene22583	comp27961_c0_seq1	0.616357	0.58414
	CL9848.Contig1	104 1420 minus strand hypothetical protein AP7_B10.1 [Arabidopsis lyrata subsp. petraea]		4	123	0.8			CL9848.Contig1	comp23072_c0_seq1	-0.530288	1
	CL14569.Contig1	227 1381 chloroplast phosphoribosylformylglycinamidine cyclo-ligase [Arabidopsis lyrata subsp. lyrata] >gi|297322120|gb|EFH52541.1| chloroplast phosphoribosylformylglycinamidine cyclo-ligase [Arabidopsis lyrata subsp. lyrata]		5	199	1.065			CL14569.Contig1	comp24984_c0_seq1	0.284239	0.861965
	CL3331.Contig2	3 1853 hypothetical protein 24.t00015 [Brassica oleracea]	CL3331.Contig3	4	120	1.065			CL3331.Contig2	comp32230_c1_seq26	31.471	0.0974087
	Unigene26860	109 2796 minus strand translation initiation factor eIF-3 subunit 8 [Arabidopsis thaliana] >gi|334186011|ref|NP_001190102.1| translation initiation factor eIF-3 subunit 8 [Arabidopsis thaliana] >gi|23503063|sp|O49160.2|EIF3C_ARATH RecName: Full=		12	438	1.66	*	+	Unigene26860	comp29590_c0_seq1	0.577046	0.615149
	Unigene6675	43 2331 hypothetical protein ARALYDRAFT_491159 [Arabidopsis lyrata subsp. lyrata] >gi|297312934|gb|EFH43357.1| hypothetical protein ARALYDRAFT_491159 [Arabidopsis lyrata subsp. lyrata]		25	656	0.445	*	-	Unigene6675	comp13526_c0_seq1	2.8606	0.000573633	+
	Unigene686	27 524 minus strand coatomer subunit alpha-2 [Arabidopsis thaliana] >gi|75337326|sp|Q9SJT9.1|COPA2_ARATH RecName: Full=Coatomer subunit alpha-2; AltName: Full=Alpha-coat protein 2; Short=Alpha-COP 2 >gi|4567286|gb|AAD23699.1| coatomer alpha subu		2	71	2.07			Unigene686	comp32141_c0_seq2	0.0223146	1
	CL442.Contig4	75 1967 minus strand hypothetical protein ARALYDRAFT_894840 [Arabidopsis lyrata subsp. lyrata] >gi|297334612|gb|EFH65030.1| hypothetical protein ARALYDRAFT_894840 [Arabidopsis lyrata subsp. lyrata]		6	76	0.731			CL442.Contig4	comp13605_c0_seq1	2.75993	0.00215495
	Unigene21305	2 1846 minus strand hypothetical protein ARALYDRAFT_486740 [Arabidopsis lyrata subsp. lyrata] >gi|297324292|gb|EFH54713.1| hypothetical protein ARALYDRAFT_486740 [Arabidopsis lyrata subsp. lyrata]		3	114	1.26			Unigene21305	comp28827_c0_seq1	-0.0727956	1
	CL4329.Contig1	56 1864 minus strand hypothetical protein ARALYDRAFT_486945 [Arabidopsis lyrata subsp. lyrata] >gi|297316768|gb|EFH47190.1| hypothetical protein ARALYDRAFT_486945 [Arabidopsis lyrata subsp. lyrata]		10	496	1.543	*	+	CL4329.Contig1	comp31990_c1_seq1	4.18967	7.42e-06	+
	CL6999.Contig2	141 911 minus strand universal stress protein (USP) family pr [Arabidopsis thaliana] >gi|21703134|gb|AAM74507.1| AT4g27320/M4I22_130 [Arabidopsis thaliana] >gi|23505839|gb|AAN28779.1| At4g27320/M4I22_130 [Arabidopsis thaliana] >gi|332659924|gb|A		6	131	0.85			CL6999.Contig2	comp33684_c0_seq1	-0.742363	0.46978
	CL1543.Contig5	82 2025 minus strand heat shock 70kDa protein 1/8 [Arabidopsis thaliana] >gi|12643273|sp|P22953.3|MD37E_ARATH RecName: Full=Probable mediator of RNA polymerase II transcription subunit 37e; AltName: Full=Heat shock 70 kDa protein 1; AltName: Ful		4	2385	1.582			CL1543.Contig5	comp26010_c0_seq3	-3.28322	0.000260482	-
	CL6296.Contig2	47 637 40S ribosomal protein S9 [Arabidopsis lyrata subsp. lyrata] >gi|297319550|gb|EFH49972.1| 40S ribosomal protein S9 [Arabidopsis lyrata subsp. lyrata]		6	200	1.607			CL6296.Contig2	comp26910_c0_seq4	0.476613	0.726527
	CL897.Contig2	464 2356 glycosyl hydrolase family 3 protein [Arabidopsis lyrata subsp. lyrata] >gi|297319862|gb|EFH50284.1| glycosyl hydrolase family 3 protein [Arabidopsis lyrata subsp. lyrata]	CL897.Contig4	7	231	0.853			CL897.Contig2	comp30595_c0_seq1	0.376603	0.98254
	CL3863.Contig4	207 1343 minus strand hypothetical protein ARALYDRAFT_908776 [Arabidopsis lyrata subsp. lyrata] >gi|297319187|gb|EFH49609.1| hypothetical protein ARALYDRAFT_908776 [Arabidopsis lyrata subsp. lyrata]	CL3863.Contig6	3	95	0.815			CL3863.Contig4	comp49345_c0_seq1	0.79164	0.780368
	CL245.Contig3	87 1940 hypothetical protein ARALYDRAFT_478675 [Arabidopsis lyrata subsp. lyrata] >gi|297328644|gb|EFH59063.1| hypothetical protein ARALYDRAFT_478675 [Arabidopsis lyrata subsp. lyrata]		2	159	1.122			CL245.Contig3	comp31869_c0_seq5	-0.97949	0.321405
	Unigene8058	62 1219 minus strand epithiospecifier modifier [Brassica rapa subsp. pekinensis] >gi|226444219|gb|ACO57706.1| epithiospecifier modifier [Brassica rapa subsp. pekinensis]		91	3249	0.731	*	-	Unigene8058	comp12442_c0_seq1	3.90764	3.12e-06	+
	CL14494.Contig1	51 878 minus strand legume lectin family protein [Arabidopsis lyrata subsp. lyrata] >gi|297330987|gb|EFH61406.1| legume lectin family protein [Arabidopsis lyrata subsp. lyrata]		30	1016	0.73	*	-	CL14494.Contig1	comp25360_c0_seq1	-6.66252	1.92e-12	-
	CL9766.Contig2	2 940 glycosyl transferase, family 35 protein [Arabidopsis thaliana] >gi|11994512|dbj|BAB02576.1| glycogen phosphorylase B; starch phosphorylase [Arabidopsis thaliana] >gi|15146189|gb|AAK83578.1| AT3g29320/MUO10_2 [Arabidopsis thaliana] >gi|27764		14	356	1.562	*	+	CL9766.Contig2	comp31472_c0_seq4	0.931794	0.403013
	Unigene27345	18 572 minus strand unnamed protein product [Thellungiella halophila]		6	218	1.255			Unigene27345	comp33874_c0_seq1	-1.80048	0.0392606
	CL779.Contig1	245 676 minus strand high mobility group B2 protein [Brassica napus]	CL779.Contig2 CL779.Contig3 CL779.Contig4 Unigene23441	7	341	1.737	*	+	CL779.Contig1	comp1_c0_seq1	-1.20836	0.606426
	CL12866.Contig1	2 3190 hypothetical protein ARALYDRAFT_341449 [Arabidopsis lyrata subsp. lyrata] >gi|297328655|gb|EFH59074.1| hypothetical protein ARALYDRAFT_341449 [Arabidopsis lyrata subsp. lyrata]		23	855	1.074			CL12866.Contig1	comp32010_c0_seq2	-0.11595	0.976362
	CL5193.Contig1	108 1859 minus strand pyruvate kinase [Arabidopsis thaliana] >gi|75309198|sp|Q9FLW9.1|PKP2_ARATH RecName: Full=Plastidial pyruvate kinase 2; Short=PKp2; AltName: Full=Plastidial pyruvate kinase 1; Short=PKP1; AltName: Full=Pyruvate kinase III; A	CL5193.Contig2	5	194	1.667	*	+	CL5193.Contig1	comp31806_c0_seq1	-0.672947	0.528077
	CL373.Contig1	53 1888 unnamed protein product [Thellungiella halophila]	Unigene28311	9	196	1.076			CL373.Contig1	comp30946_c0_seq4	-0.367334	0.837231
	CL1485.Contig1	3 2594 octicosapeptide/Phox/Be.1 domain-containing protein kinase [Arabidopsis thaliana] >gi|330253962|gb|AEC09056.1| octicosapeptide/Phox/Be.1 domain-containing protein kinase [Arabidopsis thaliana]		7	360	0.94			CL1485.Contig1	comp25268_c0_seq3	0.854715	0.554234
	Unigene9390	1 225 hypothetical protein ARALYDRAFT_342166 [Arabidopsis lyrata subsp. lyrata] >gi|297331199|gb|EFH61618.1| hypothetical protein ARALYDRAFT_342166 [Arabidopsis lyrata subsp. lyrata]		4	233	0.864			Unigene9390	comp31786_c0_seq2	33.7815	0.000152415	+
	Unigene16132	3 743 predicted protein [Arabidopsis lyrata subsp. lyrata] >gi|297330152|gb|EFH60571.1| predicted protein [Arabidopsis lyrata subsp. lyrata]		3	70	1.077			Unigene16132	comp14231_c0_seq1	-0.368935	0.776184
	CL841.Contig1	29 781 minus strand HAD superfamily, subfamily IIIB acid phosphatase [Arabidopsis thaliana] >gi|7269824|emb|CAB79684.1| acid phosphatase-like protein [Arabidopsis thaliana] >gi|332660208|gb|AEE85608.1| HAD superfamily, subfamily IIIB acid phosph	CL841.Contig2	5	98	0.84			CL841.Contig1	comp49866_c0_seq1	33.6056	0.000314086	+
	Unigene30172	59 1753 predicted protein [Arabidopsis lyrata subsp. lyrata] >gi|297338421|gb|EFH68838.1| predicted protein [Arabidopsis lyrata subsp. lyrata]		3	229	1.488			Unigene30172	comp31832_c0_seq7	2.24423	0.0261563
	CL24.Contig2	102 2297 hypothetical protein ARALYDRAFT_474357 [Arabidopsis lyrata subsp. lyrata] >gi|297337535|gb|EFH67952.1| hypothetical protein ARALYDRAFT_474357 [Arabidopsis lyrata subsp. lyrata]		7	265	1.851	*	+	CL24.Contig2	comp29199_c0_seq1	0.454605	0.77192
	CL3612.Contig1	130 2976 hypothetical protein ARALYDRAFT_480836 [Arabidopsis lyrata subsp. lyrata] >gi|297332091|gb|EFH62510.1| hypothetical protein ARALYDRAFT_480836 [Arabidopsis lyrata subsp. lyrata]		9	724	1.882	*	+	CL3612.Contig1	comp15287_c0_seq1	1.3766	0.586561
	CL7633.Contig1	47 454 unknown [Arabidopsis thaliana]	CL7633.Contig2	2	149	1.01			CL7633.Contig1	comp64786_c0_seq1	31.9733	0.0489753
	Unigene27748	160 2040 minus strand At1g68060/T23K23_9 [Arabidopsis lyrata subsp. lyrata] >gi|297336539|gb|EFH66956.1| At1g68060/T23K23_9 [Arabidopsis lyrata subsp. lyrata]		4	115	0.858			Unigene27748	comp31249_c0_seq3	1.8889	0.13908
	Unigene25466	115 1554 glycosyl hydrolase family 17 protein [Arabidopsis lyrata subsp. lyrata] >gi|297312085|gb|EFH42509.1| glycosyl hydrolase family 17 protein [Arabidopsis lyrata subsp. lyrata]		12	230	0.659	*	-	Unigene25466	comp30248_c1_seq1	1.85643	0.0377881
	CL3624.Contig2	117 542 40S ribosomal protein S19-1 [Arabidopsis thaliana] >gi|27923843|sp|Q9SGA6.1|RS191_ARATH RecName: Full=40S ribosomal protein S19-1 >gi|332640239|gb|AEE73760.1| 40S ribosomal protein S19-1 [Arabidopsis thaliana]	CL3624.Contig3 CL3624.Contig4 CL3624.Contig5	2	134	0.687			CL3624.Contig2	comp30526_c1_seq1	0.786823	0.436391
	CL11043.Contig1	123 1295 Pectinacetylesterase family protein [Arabidopsis thaliana] >gi|332658777|gb|AEE84177.1| Pectinacetylesterase family protein [Arabidopsis thaliana]		17	585	0.637	*	-	CL11043.Contig1	comp27823_c0_seq1	-0.0267718	1
	Unigene29320	168 1298 minus strand actin 7 [Brassica rapa subsp. pekinensis]		5	1458	1.23			Unigene29320	comp26704_c0_seq2	-33.0661	0.00216143
	CL1520.Contig2	143 979 minus strand unknown [Arabidopsis thaliana]	CL1520.Contig4	3	373	0.793			CL1520.Contig2	comp30597_c0_seq5	-1.02682	0.444977
	Unigene18137	2 382 Ribophorin I [Arabidopsis thaliana] >gi|63003800|gb|AAY25429.1| At2g01720 [Arabidopsis thaliana] >gi|330250394|gb|AEC05488.1| Ribophorin I [Arabidopsis thaliana]		2	47	1.026			Unigene18137	comp30650_c0_seq1	-0.240068	0.889098
	CL6935.Contig2	129 866 minus strand phosphomannomutase [Brassica rapa subsp. chinensis]		3	49	0.802			CL6935.Contig2	comp30965_c0_seq3	1.39073	0.184892
	CL3162.Contig2	293 1243 minus strand hypothetical protein ARALYDRAFT_493188 [Arabidopsis lyrata subsp. lyrata] >gi|297315966|gb|EFH46389.1| hypothetical protein ARALYDRAFT_493188 [Arabidopsis lyrata subsp. lyrata]	CL3162.Contig3	4	368	0.72			CL3162.Contig2	comp29946_c0_seq21	-1.42553	0.109189
	CL1567.Contig1	45 605 disease resistance response protein [Brassica rapa]		7	220	1.223			CL1567.Contig1	comp38914_c0_seq1	1.66611	0.356889
	CL5423.Contig3	200 2701 minus strand unnamed protein product [Arabidopsis thaliana]	CL5423.Contig4	10	264	0.806	*	-	CL5423.Contig3	comp31795_c0_seq4	-0.615079	0.714256
	CL2051.Contig2	5 4045 minus strand G2484-1 protein [Arabidopsis thaliana] >gi|332658477|gb|AEE83877.1| G2484-1 protein [Arabidopsis thaliana]		8	146	1.031			CL2051.Contig2	comp26116_c0_seq4	-1.23751	0.235091
	CL3357.Contig1	443 1084 ATGPX6 [Arabidopsis lyrata subsp. lyrata] >gi|297320540|gb|EFH50962.1| ATGPX6 [Arabidopsis lyrata subsp. lyrata]	CL3357.Contig3 CL3357.Contig6	15	276	0.994			CL3357.Contig1	comp27342_c0_seq2	-0.0566208	1
	CL12622.Contig1	110 976 transcription factor Pur-alpha 1 [Arabidopsis thaliana] >gi|16930405|gb|AAL31888.1|AF419556_1 At2g32080/F22D22.17 [Arabidopsis thaliana] >gi|330253538|gb|AEC08632.1| transcription factor Pur-alpha 1 [Arabidopsis thaliana]		4	161	1.023			CL12622.Contig1	comp26394_c0_seq1	-0.318123	0.82492
	CL490.Contig1	219 1316 minus strand hypothetical protein ARALYDRAFT_902068 [Arabidopsis lyrata subsp. lyrata] >gi|297325117|gb|EFH55537.1| hypothetical protein ARALYDRAFT_902068 [Arabidopsis lyrata subsp. lyrata]		3	104	1.258			CL490.Contig1	comp30409_c0_seq24	31.1774	0.205076
	CL4748.Contig2	290 1603 VH1-interacting kinase [Arabidopsis thaliana] >gi|5080776|gb|AAD39286.1|AC007576_9 Similar to protein kinases [Arabidopsis thaliana] >gi|111074450|gb|ABH04598.1| At1g14000 [Arabidopsis thaliana] >gi|332190976|gb|AEE29097.1| VH1-interacti		3	109	0.769			CL4748.Contig2	comp28562_c0_seq1	-0.87174	0.360083
	Unigene11513	1 1434 predicted protein [Arabidopsis lyrata subsp. lyrata] >gi|297338611|gb|EFH69028.1| predicted protein [Arabidopsis lyrata subsp. lyrata]		5	107	1.116			Unigene11513	comp21823_c0_seq1	0.443717	0.766923
	CL8662.Contig1	451 1410 minus strand alpha-soluble NSF attachment protein 2 [Arabidopsis thaliana] >gi|18203446|sp|Q9SPE6.1|SNAA2_ARATH RecName: Full=Alpha-soluble NSF attachment protein 2; Short=Alpha-SNAP2; AltName: Full=N-ethylmaleimide-sensitive factor att		3	66	1.459			CL8662.Contig1	comp25290_c0_seq1	-0.261171	0.874705
	Unigene676	7 498 minus strand predicted protein [Arabidopsis lyrata subsp. lyrata] >gi|297316610|gb|EFH47033.1| predicted protein [Arabidopsis lyrata subsp. lyrata]		10	170	1.687			Unigene676	comp29794_c2_seq5	0.825181	0.388716
	Unigene28613	1 1653 chaperonin CPN60-like 1 [Arabidopsis thaliana] >gi|75301136|sp|Q8L7B5.1|CH60B_ARATH RecName: Full=Chaperonin CPN60-like 1, mitochondrial; AltName: Full=HSP60-like 1; Flags: Precursor >gi|22531044|gb|AAM97026.1| mitochondrial chaperonin HSP		8	1024	1.321			Unigene28613	comp29527_c0_seq2	0.174855	0.954964
	CL419.Contig1	2 1723 minus strand hypothetical protein ARALYDRAFT_888870 [Arabidopsis lyrata subsp. lyrata] >gi|297338674|gb|EFH69091.1| hypothetical protein ARALYDRAFT_888870 [Arabidopsis lyrata subsp. lyrata]		5	104	1.135			CL419.Contig1	comp28412_c0_seq2	0.720163	0.543022
	CL866.Contig1	2 328 DnaJ domain-containing protein [Arabidopsis thaliana] >gi|208879540|gb|ACI31315.1| At3g08910 [Arabidopsis thaliana] >gi|332641173|gb|AEE74694.1| DnaJ domain-containing protein [Arabidopsis thaliana]	CL866.Contig2	3	44	0.572			CL866.Contig1	comp26268_c0_seq1	1.21295	0.227818
	Unigene6768	2 286 NAD-dependent isocitrate dehydrogenase gamma subunit [Brassica napus] >gi|28974506|gb|AAO61649.1| NAD-dependent isocitrate dehydrogenase gamma subunit [Brassica napus] >gi|28974508|gb|AAO61650.1| NAD-dependent isocitrate dehydrogenase gamma		2	178	0.558			Unigene6768	comp31249_c1_seq4	-5.00317	1.45e-07	-
	Unigene14937	2 724 RecName: Full=Xyloglucan endotransglucosylase/hydrolase; AltName: Full=BobXET16A; Flags: Precursor >gi|37359374|gb|AAO00727.1| xyloglucan endotransglycosylase precursor [Brassica oleracea var. botrytis]		8	164	1.307			Unigene14937	comp69734_c0_seq1	2.11357	0.279222
	Unigene25834	2 346 heat shock protein 70 like protein [Arabidopsis thaliana] >gi|7270774|emb|CAB80456.1| heat shock protein 70 like protein [Arabidopsis thaliana]		4	230	1.962	*	+	Unigene25834	comp31038_c0_seq2	0.889827	0.353816
	CL4655.Contig1	116 337 minus strand uncharacterized protein [Arabidopsis thaliana] >gi|8778458|gb|AAF79466.1|AC022492_10 F1L3.19 [Arabidopsis thaliana] >gi|15450369|gb|AAK96478.1| At1g17490/F1L3_4 [Arabidopsis thaliana] >gi|16974479|gb|AAL31243.1| At1g17490/F1		5	187	0.891	*		CL4655.Contig1	comp21247_c0_seq1	-0.623397	0.746244
	Unigene25509	83 1036 minus strand soluble epoxide hydrolase [Brassica napus]		2	52	2.753			Unigene25509	comp20733_c0_seq1	-2.38155	0.00458638
	CL7195.Contig4	148 903 minus strand Allene oxide cyclase 4, chloroplastic OS=Arabidopsis thaliana GN=AOC4 PE=2 SV=1		8	202	1.295			CL7195.Contig4	comp25072_c0_seq1	0.284157	0.863015
	Unigene26923	100 1338 nuclear protein localization protein 4-like protein [Arabidopsis thaliana] >gi|75181052|sp|Q9LYC2.1|NPL41_ARATH RecName: Full=NPL4-like protein 1 >gi|332646901|gb|AEE80422.1| nuclear protein localization protein 4-like protein [Arabidops		3	153	1.184			Unigene26923	comp33243_c0_seq1	-0.348537	0.795089
	Unigene8038	107 1741 minus strand clathrin interactor EPSIN 1 [Arabidopsis thaliana] >gi|75161393|sp|Q8VY07.1|EPN1_ARATH RecName: Full=Clathrin interactor EPSIN 1; AltName: Full=EPSIN-related 1 >gi|110735797|dbj|BAE99875.1| clathrin binding protein - like [		14	485	0.825			Unigene8038	comp33628_c0_seq1	0.343234	0.804442
	CL6943.Contig1	38 1558 minus strand beta glucosidase 15 [Arabidopsis thaliana] >gi|75278312|sp|O64879.1|BGL15_ARATH RecName: Full=Beta-glucosidase 15; Short=AtBGLU15; Flags: Precursor >gi|330255327|gb|AEC10421.1| beta glucosidase 15 [Arabidopsis thaliana]		6	172	0.969			CL6943.Contig1	comp24011_c0_seq3	2.82962	0.00455443
	CL930.Contig1	215 1498 plastidic glutamine synthetase precursor [Brassica napus]		5	191	1.014			CL930.Contig1	comp29732_c0_seq3	-1.08682	0.31405
	CL13111.Contig1	182 3040 minus strand zinc ion binding protein [Arabidopsis lyrata subsp. lyrata] >gi|297338781|gb|EFH69198.1| zinc ion binding protein [Arabidopsis lyrata subsp. lyrata]		4	248	0.782			CL13111.Contig1	comp30166_c0_seq4	-1.57215	0.726169
	CL1614.Contig1	107 682 AIG2-like protein [Arabidopsis thaliana] >gi|10177973|dbj|BAB11379.1| AIG2-like protein [Arabidopsis thaliana] >gi|19698947|gb|AAL91209.1| AIG2-like protein [Arabidopsis thaliana] >gi|21387207|gb|AAM48007.1| AIG2-like protein [Arabidopsis	CL1614.Contig2	2	36	1.05			CL1614.Contig1	comp22046_c0_seq1	2.78418	0.00178433
	CL11882.Contig3	63 1193 de-etiolated 3 [Arabidopsis lyrata subsp. lyrata] >gi|297335815|gb|EFH66232.1| de-etiolated 3 [Arabidopsis lyrata subsp. lyrata]		7	310	1.209			CL11882.Contig3	comp31752_c0_seq2	0.179633	0.935805
	CL6941.Contig3	155 1465 hypothetical protein ARALYDRAFT_485414 [Arabidopsis lyrata subsp. lyrata] >gi|297323597|gb|EFH54018.1| hypothetical protein ARALYDRAFT_485414 [Arabidopsis lyrata subsp. lyrata]		4	85	1.319	*	+	CL6941.Contig3	comp12433_c0_seq1	2.599	0.257553
	Unigene19731	21 380 minus strand hypothetical protein ARALYDRAFT_918901 [Arabidopsis lyrata subsp. lyrata] >gi|297312034|gb|EFH42458.1| hypothetical protein ARALYDRAFT_918901 [Arabidopsis lyrata subsp. lyrata]		27	1010	1.448	*	+	Unigene19731	comp26515_c0_seq1	1.11674	0.210163
	CL959.Contig2	61 1044 minus strand hypothetical protein ARALYDRAFT_496608 [Arabidopsis lyrata subsp. lyrata] >gi|297312431|gb|EFH42855.1| hypothetical protein ARALYDRAFT_496608 [Arabidopsis lyrata subsp. lyrata]		33	1062	0.656	*	-	CL959.Contig2	comp14558_c0_seq1	-33.0305	0.00275059
	CL2345.Contig1	197 607 minus strand Chain A, Solution Structure Of Pin1at From Arabidopsis Thaliana		5	70	0.783	*	-	CL2345.Contig1	comp23635_c0_seq2	35.3349	1.35e-07	+
	CL14649.Contig1	292 729 ribosomal large subunit structural protein [Brassica juncea]		8	195	2.402	*	+	CL14649.Contig1	comp42619_c0_seq1	-33.4447	0.000570552	-
	CL3921.Contig1	2 1672 minus strand F-type H+-transporting ATPase subunit beta [Arabidopsis thaliana] >gi|332003953|gb|AED91336.1| F-type H+-transporting ATPase subunit beta [Arabidopsis thaliana]		64	2256	0.95			CL3921.Contig1	comp62933_c0_seq1	0.206678	1
	CL13447.Contig1	79 1017 plant UBX domain-containing protein 4 [Arabidopsis lyrata subsp. lyrata] >gi|297318521|gb|EFH48943.1| plant UBX domain-containing protein 4 [Arabidopsis lyrata subsp. lyrata]		16	553	0.757	*	-	CL13447.Contig1	comp25746_c1_seq1	-0.496791	0.680919
	CL10653.Contig1	180 3023 minus strand Peptidase M1 family protein [Arabidopsis thaliana] >gi|332196024|gb|AEE34145.1| Peptidase M1 family protein [Arabidopsis thaliana]	CL10653.Contig2	10	187	1.288			CL10653.Contig1	comp31368_c0_seq1	-0.400546	0.749903
	CL9047.Contig1	106 1899 minus strand unnamed protein product [Thellungiella halophila]		6	145	1.674			CL9047.Contig1	comp32250_c1_seq1	-0.401605	0.775051
	CL4431.Contig1	46 687 minus strand trypsin inhibitor propeptide [Brassica oleracea]		23	539	0.797	*	-	CL4431.Contig1	comp33982_c0_seq1	-1.43262	0.104039
	Unigene414	183 1637 putative diaminopimelate decarboxylase [Brassica napus]		9	205	0.903			Unigene414	comp31643_c1_seq1	-34.2806	2.03e-05	-
	CL7348.Contig1	1757 2917 strictosidine synthase family protein [Arabidopsis lyrata subsp. lyrata] >gi|297338301|gb|EFH68718.1| strictosidine synthase family protein [Arabidopsis lyrata subsp. lyrata]		3	102	0.872			CL7348.Contig1	comp30614_c0_seq30	-0.660146	0.544992
	CL1488.Contig3	550 1014 ERD15 protein [Brassica rapa]	CL1488.Contig5	2	75	0.821			CL1488.Contig3	comp23379_c0_seq1	0.111671	0.98254
	Unigene21522	2 334 minus strand hypothetical protein ARALYDRAFT_904624 [Arabidopsis lyrata subsp. lyrata] >gi|297322724|gb|EFH53145.1| hypothetical protein ARALYDRAFT_904624 [Arabidopsis lyrata subsp. lyrata]		8	183	0.855			Unigene21522	comp24038_c0_seq2	1.05026	0.311092
	CL8050.Contig1	4 1116 minus strand unnamed protein product [Thellungiella halophila]		29	676	0.681	*	-	CL8050.Contig1	comp32881_c0_seq1	0.840221	0.381648
	CL10823.Contig2	209 2314 minus strand MA3 domain-containing protein [Arabidopsis thaliana] >gi|79325245|ref|NP_001031708.1| MA3 domain-containing protein [Arabidopsis thaliana] >gi|334186898|ref|NP_001190828.1| MA3 domain-containing protein [Arabidopsis thalian		3	116	1.137			CL10823.Contig2	comp27881_c0_seq1	1.11357	0.234968
	CL6957.Contig1	69 1325 minus strand hypothetical protein ARALYDRAFT_474538 [Arabidopsis lyrata subsp. lyrata] >gi|297340319|gb|EFH70736.1| hypothetical protein ARALYDRAFT_474538 [Arabidopsis lyrata subsp. lyrata]	CL6957.Contig4 CL6957.Contig5	4	51	0.697			CL6957.Contig1	comp31467_c0_seq1	-0.993465	0.288943
	Unigene19442	71 1135 minus strand Rossmann-fold NAD(P)-binding domain-containing protein [Arabidopsis thaliana] >gi|332642902|gb|AEE76423.1| Rossmann-fold NAD(P)-binding domain-containing protein [Arabidopsis thaliana]		3	187	0.747			Unigene19442	comp18478_c0_seq1	3.49208	0.00102727
	CL3259.Contig2	1 783 minus strand hypothetical protein [Arabidopsis thaliana] >gi|7268868|emb|CAB79072.1| hypothetical protein [Arabidopsis thaliana]		2	91	1.335			CL3259.Contig2	comp31273_c0_seq3	2.07704	0.0717486
	Unigene22050	264 1085 hypothetical protein ARALYDRAFT_495848 [Arabidopsis lyrata subsp. lyrata] >gi|297312043|gb|EFH42467.1| hypothetical protein ARALYDRAFT_495848 [Arabidopsis lyrata subsp. lyrata]		6	240	0.459	*	-	Unigene22050	comp9456_c0_seq1	-0.113723	1
	CL8247.Contig1	161 1576 minus strand hypothetical protein ARALYDRAFT_490746 [Arabidopsis lyrata subsp. lyrata] >gi|297312710|gb|EFH43133.1| hypothetical protein ARALYDRAFT_490746 [Arabidopsis lyrata subsp. lyrata]		9	208	1.009			CL8247.Contig1	comp28415_c0_seq3	-32.7247	0.00777489
	CL122.Contig2	175 2841 minus strand FERONIA receptor-like kinase [Brassica oleracea]	CL122.Contig3 CL122.Contig4	7	149	0.976			CL122.Contig2	comp109852_c0_seq1	0.79164	0.889098
	Unigene2216	3 362 60S ribosomal protein L34-1 [Arabidopsis thaliana] >gi|2500376|sp|Q42351.1|RL341_ARATH RecName: Full=60S ribosomal protein L34-1 >gi|4262177|gb|AAD14494.1| 60s ribosomal protein L34 [Arabidopsis thaliana] >gi|332192632|gb|AEE30753.1| 60S ri	Unigene20033 Unigene20780	5	217	2.336	*	+	Unigene2216	comp21493_c0_seq1	-33.3192	0.00108402
	CL7787.Contig2	151 627 minus strand hypothetical protein [Brassica rapa]		7	323	1.415			CL7787.Contig2	comp22198_c0_seq1	-1.30202	0.137413
	CL14448.Contig1	141 1409 ATP-citrate lyase A-2 [Arabidopsis lyrata subsp. lyrata] >gi|297332426|gb|EFH62844.1| ATP-citrate lyase A-2 [Arabidopsis lyrata subsp. lyrata]	CL14448.Contig2	3	129	1.745			CL14448.Contig1	comp94019_c0_seq1	-1.05636	0.650152
	CL1027.Contig2	129 1187 minus strand peroxidase 34 [Arabidopsis thaliana] >gi|25453220|sp|Q9SMU8.1|PER34_ARATH RecName: Full=Peroxidase 34; Short=Atperox P34; AltName: Full=ATPCb; Flags: Precursor >gi|16930431|gb|AAL31901.1|AF419569_1 AT3g49120/T2J13_40 [Arabi	CL1027.Contig3	13	656	0.794			CL1027.Contig2	comp27698_c0_seq1	4.01652	2.26e-05	+
	CL5470.Contig1	241 3153 minus strand unnamed protein product [Thellungiella halophila]		3	64	0.809			CL5470.Contig1	comp26024_c0_seq1	-1.3079	0.347845
	Unigene22210	2 382 minus strand unnamed protein product [Thellungiella halophila]		2	272	2.091			Unigene22210	comp32023_c1_seq1	1.26979	0.140092
	CL4704.Contig2	1 1746 minus strand ATPREP1 [Arabidopsis lyrata subsp. lyrata] >gi|297331138|gb|EFH61557.1| ATPREP1 [Arabidopsis lyrata subsp. lyrata]		4	99	1.145			CL4704.Contig2	comp26607_c0_seq3	31.7132	0.0686039
	CL13926.Contig1	126 737 uncharacterized protein [Arabidopsis thaliana] >gi|20197269|gb|AAC31240.2| expressed protein [Arabidopsis thaliana] >gi|20197367|gb|AAM15044.1| expressed protein [Arabidopsis thaliana] >gi|29028814|gb|AAO64786.1| At2g25950 [Arabidopsis th	CL13926.Contig2	3	85	0.752			CL13926.Contig1	comp34461_c0_seq1	0.550632	0.647956
	CL5956.Contig1	158 1090 Late embryogenesis abundant protein, group 2 [Arabidopsis thaliana] >gi|30689599|ref|NP_850408.1| Late embryogenesis abundant protein, group 2 [Arabidopsis thaliana] >gi|3212877|gb|AAC23428.1| similar to late embryogenesis abundant prote		15	1156	1.22			CL5956.Contig1	comp20283_c0_seq1	0.822393	0.396094
	Unigene8621	162 686 minus strand universal stress protein (USP) family protein [Arabidopsis thaliana] >gi|45476563|gb|AAS65947.1| At5g14680 [Arabidopsis thaliana] >gi|52627107|gb|AAU84680.1| At5g14680 [Arabidopsis thaliana] >gi|332004679|gb|AED92062.1| univ		2	56	0.703			Unigene8621	comp32992_c0_seq1	0.610275	0.583761
	CL890.Contig15	257 1846 minus strand hypothetical protein ARALYDRAFT_899530 [Arabidopsis lyrata subsp. lyrata] >gi|297331692|gb|EFH62111.1| hypothetical protein ARALYDRAFT_899530 [Arabidopsis lyrata subsp. lyrata]		2	60	1.197			CL890.Contig15	comp24356_c0_seq1	2.599	0.109002
	CL2807.Contig2	149 481 hypothetical protein ARALYDRAFT_486090 [Arabidopsis lyrata subsp. lyrata] >gi|297322207|gb|EFH52628.1| hypothetical protein ARALYDRAFT_486090 [Arabidopsis lyrata subsp. lyrata]		2	104	0.79			CL2807.Contig2	comp26972_c0_seq3	1.24586	0.205076
	CL9331.Contig1	124 1260 minus strand alcohol dehydrogenase 1 [Brassica rapa]		48	1022	1.124	*		CL9331.Contig1	comp14747_c0_seq3	32.6093	0.00777489
	CL2436.Contig3	124 1233 minus strand nucleosome assembly protein 1;2 [Arabidopsis thaliana] >gi|330251791|gb|AEC06885.1| nucleosome assembly protein 1;2 [Arabidopsis thaliana]		4	748	0.808			CL2436.Contig3	comp29891_c3_seq2	31.6093	0.0974087
	CL7515.Contig1	154 1116 minus strand uncharacterized protein [Arabidopsis thaliana] >gi|53828515|gb|AAU94367.1| At1g65020 [Arabidopsis thaliana] >gi|55167914|gb|AAV43789.1| At1g65020 [Arabidopsis thaliana] >gi|332196195|gb|AEE34316.1| uncharacterized protein [		5	97	1.266			CL7515.Contig1	comp21317_c1_seq2	1.3826	0.650873
	Unigene15602	161 460 minus strand membrane-associated progesterone binding protein 2 [Arabidopsis lyrata subsp. lyrata] >gi|297324649|gb|EFH55069.1| membrane-associated progesterone binding protein 2 [Arabidopsis lyrata subsp. lyrata]		19	525	1.046			Unigene15602	comp24399_c0_seq1	1.03265	0.37472
	CL1688.Contig1	178 3237 C2 domain-containing protein [Arabidopsis thaliana] >gi|6587829|gb|AAF18518.1|AC006551_4 Highly similar to phosphoribosylanthranilate transferase [Arabidopsis thaliana] >gi|332192139|gb|AEE30260.1| C2 domain-containing protein [Arabidops	CL1688.Contig2	18	710	0.978			CL1688.Contig1	comp30725_c0_seq1	-0.517713	0.719245
	CL2476.Contig1	75 2507 minus strand RecName: Full=Phospholipase D alpha 2; Short=PLD 2; AltName: Full=Choline phosphatase 2; AltName: Full=Phosphatidylcholine-hydrolyzing phospholipase D 2; Flags: Precursor >gi|3639087|gb|AAC78486.1| phospholipase D2 [Brassica		19	1320	1.698	*	+	CL2476.Contig1	comp31055_c0_seq3	-1.0746	0.388915
	CL1927.Contig18	337 1803 6-phosphofructokinase 3 [Arabidopsis thaliana] >gi|75164938|sp|Q94AA4.1|K6PF3_ARATH RecName: Full=6-phosphofructokinase 3; AltName: Full=Phosphofructokinase 3; AltName: Full=Phosphohexokinase 3 >gi|15146208|gb|AAK83587.1| AT4g26270/T25K1	CL1927.Contig9	9	206	0.796			CL1927.Contig18	comp25639_c0_seq1	-1.97775	0.0712022
	Unigene23091	42 539 minus strand Lactoylglutathione lyase / glyoxalase I-like protein [Arabidopsis thaliana] >gi|73921149|sp|Q9LV66.1|Y5848_ARATH RecName: Full=Uncharacterized protein At5g48480 >gi|332008292|gb|AED95675.1| Lactoylglutathione lyase / glyoxala		6	219	1.445			Unigene23091	comp25480_c1_seq3	0.994017	0.532106
	CL4806.Contig2	55 972 protein EXORDIUM like 2 [Arabidopsis thaliana] >gi|14190477|gb|AAK55719.1|AF380638_1 AT5g64260/MSJ1_10 [Arabidopsis thaliana] >gi|9759402|dbj|BAB09857.1| phi-1-like protein [Arabidopsis thaliana] >gi|16323270|gb|AAL15369.1| AT5g64260/MSJ1_		4	192	0.536	*	-	CL4806.Contig2	comp64311_c0_seq1	-0.793322	0.779355
	CL1329.Contig2	115 1098 guanine nucleotide-binding family protein [Arabidopsis lyrata subsp. lyrata] >gi|297331080|gb|EFH61499.1| guanine nucleotide-binding family protein [Arabidopsis lyrata subsp. lyrata]		3	422	0.992			CL1329.Contig2	comp32216_c0_seq3	-0.035028	1
	Unigene29779	347 997 minus strand expressed protein [Arabidopsis lyrata subsp. lyrata] >gi|297308576|gb|EFH39091.1| expressed protein [Arabidopsis lyrata subsp. lyrata]		3	141	1.027			Unigene29779	comp3971_c0_seq1	2.11357	0.154629
	CL11192.Contig1	2 163 hypothetical protein ARALYDRAFT_490638 [Arabidopsis lyrata subsp. lyrata] >gi|297314695|gb|EFH45118.1| hypothetical protein ARALYDRAFT_490638 [Arabidopsis lyrata subsp. lyrata]	CL11192.Contig2	10	444	0.983			CL11192.Contig1	comp17316_c0_seq2	-32.6671	0.00777489
	CL859.Contig1	2 334 hypothetical protein ARALYDRAFT_488161 [Arabidopsis lyrata subsp. lyrata] >gi|297319448|gb|EFH49870.1| hypothetical protein ARALYDRAFT_488161 [Arabidopsis lyrata subsp. lyrata]		4	138	1.24			CL859.Contig1	comp23392_c0_seq1	-6.37808	3.92e-06	-
	CL105.Contig4	124 1578 S-adenosyl-L-homocystein hydrolase [Arabidopsis thaliana]		72	1672	1.843	*	+	CL105.Contig4	comp29878_c0_seq4	1.03421	0.247737
	CL9862.Contig2	3 2126 1,4-alpha-glucan branching enzyme [Arabidopsis thaliana] >gi|75097945|sp|O23647.1|GLGB1_ARATH RecName: Full=1,4-alpha-glucan-branching enzyme 2-1, chloroplastic/amyloplastic; Short=AtSBE II-1; AltName: Full=Branching enzyme 3; Short=AtBE3;		7	180	1.383			CL9862.Contig2	comp26103_c0_seq1	0.0886222	1
	CL819.Contig1	109 654 minus strand 60S ribosomal protein L11-2 [Arabidopsis thaliana] >gi|18415161|ref|NP_567563.1| 60S ribosomal protein L11-2 [Arabidopsis thaliana] >gi|30694822|ref|NP_568649.2| 60S ribosomal protein L11-2 [Arabidopsis thaliana] >gi|2773523	CL819.Contig4 CL819.Contig5 CL819.Contig6	12	277	1.471	*	+	CL819.Contig1	comp28217_c0_seq3	1.04487	0.309551
	CL9803.Contig1	362 1723 oxysterol-binding family protein [Arabidopsis lyrata subsp. lyrata] >gi|297310468|gb|EFH40892.1| oxysterol-binding family protein [Arabidopsis lyrata subsp. lyrata]	CL9803.Contig2	5	166	3.086			CL9803.Contig1	comp30163_c0_seq1	33.4613	0.000570552	+
	CL1183.Contig1	189 1409 minus strand peptidoglycan-binding LysM domain-containing protein [Arabidopsis lyrata subsp. lyrata] >gi|297336312|gb|EFH66729.1| peptidoglycan-binding LysM domain-containing protein [Arabidopsis lyrata subsp. lyrata]	CL1183.Contig2	2	55	0.697			CL1183.Contig1	comp29050_c0_seq1	0.86204	0.391654
	Unigene26004	107 1564 glycosyl hydrolase family 17 protein [Arabidopsis lyrata subsp. lyrata] >gi|297315179|gb|EFH45602.1| glycosyl hydrolase family 17 protein [Arabidopsis lyrata subsp. lyrata]		8	437	0.851			Unigene26004	comp30290_c0_seq1	0.429826	0.752416
	CL1087.Contig10	208 363 minus strand arginine/serine-rich zinc knuckle-containing protein 33 [Arabidopsis thaliana] >gi|75331124|sp|Q8VYA5.1|RSZ33_ARATH RecName: Full=Serine/arginine-rich splicing factor RS2Z33; AltName: Full=RS-containing zinc finger protein 3	CL1087.Contig1 CL1087.Contig4 CL1087.Contig6 CL1087.Contig9 Unigene27694 Unigene27696	3	78	0.887			CL1087.Contig10	comp30195_c1_seq27	8.04667	0.00455443
	CL13441.Contig1	54 548 minus strand FK506-binding protein 2-2 [Arabidopsis thaliana] >gi|23396587|sp|Q38936.2|FK152_ARATH RecName: Full=Peptidyl-prolyl cis-trans isomerase FKBP15-2; Short=PPIase FKBP15-2; AltName: Full=15 kDa FK506-binding protein; Short=15 kDa		20	1052	0.953			CL13441.Contig1	comp25423_c0_seq1	-1.42004	0.223576
	Unigene26638	181 579 minus strand unknown protein [Arabidopsis thaliana]		2	61	0.569			Unigene26638	comp31951_c0_seq6	-1.33663	0.412087
	Unigene26237	23 661 Alanyl-tRNA synthetase [Arabidopsis thaliana] >gi|21542451|sp|P36428.3|SYA_ARATH RecName: Full=Alanine--tRNA ligase; AltName: Full=Alanyl-tRNA synthetase; Short=AlaRS; Flags: Precursor >gi|332194403|gb|AEE32524.1| Alanyl-tRNA synthetase [A		5	179	1.264			Unigene26237	comp106774_c0_seq1	2.3766	0.353433
	CL6224.Contig1	1 2364 minus strand beta-galactosidase [Raphanus sativus]		15	576	0.473	*	-	CL6224.Contig1	comp31424_c0_seq1	2.35332	0.0048704
	CL14598.Contig1	104 664 hypothetical protein ARALYDRAFT_918263 [Arabidopsis lyrata subsp. lyrata] >gi|297311736|gb|EFH42160.1| hypothetical protein ARALYDRAFT_918263 [Arabidopsis lyrata subsp. lyrata]		5	198	1.068			CL14598.Contig1	comp20478_c0_seq1	-0.923347	0.369883
	Unigene28385	2 940 minus strand hypothetical protein ARALYDRAFT_897659 [Arabidopsis lyrata subsp. lyrata] >gi|297328705|gb|EFH59124.1| hypothetical protein ARALYDRAFT_897659 [Arabidopsis lyrata subsp. lyrata]		9	230	0.896			Unigene28385	comp30468_c0_seq1	-0.78253	0.483116
	Unigene15756	30 668 hypothetical protein ARALYDRAFT_486758 [Arabidopsis lyrata subsp. lyrata] >gi|297322517|gb|EFH52938.1| hypothetical protein ARALYDRAFT_486758 [Arabidopsis lyrata subsp. lyrata]		2	35	1.116			Unigene15756	comp30756_c1_seq1	-0.945325	0.321134
	CL10846.Contig1	207 1001 minus strand hypothetical protein ARALYDRAFT_479023 [Arabidopsis lyrata subsp. lyrata] >gi|297328798|gb|EFH59217.1| hypothetical protein ARALYDRAFT_479023 [Arabidopsis lyrata subsp. lyrata]		4	209	1.252			CL10846.Contig1	comp28924_c0_seq1	-1.03552	0.345391
	Unigene2696	6 1547 minus strand leucine-rich repeat-like protein [Arabidopsis thaliana] >gi|44681384|gb|AAS47632.1| At1g49750 [Arabidopsis thaliana] >gi|45773904|gb|AAS76756.1| At1g49750 [Arabidopsis thaliana] >gi|222423160|dbj|BAH19559.1| AT1G49750 [Arabid		7	113	0.652	*	-	Unigene2696	comp30908_c0_seq3	-0.625752	0.582274
	CL13090.Contig1	51 1286 minus strand predicted protein [Arabidopsis lyrata subsp. lyrata] >gi|297311036|gb|EFH41460.1| predicted protein [Arabidopsis lyrata subsp. lyrata]		5	136	1.097			CL13090.Contig1	comp26923_c0_seq1	0.132677	0.981694
	CL13407.Contig1	93 860 2,4-dihydroxyhept-2-ene-1,7-dioic acid aldolase isolog [Arabidopsis thaliana]		3	110	0.954			CL13407.Contig1	comp27455_c0_seq4	2.599	0.00863198
	CL14642.Contig3	111 878 minus strand 1433-3 [Brassica napus] >gi|224981579|gb|ACN73537.1| 1433-3 [Brassica napus]		3	362	1.212			CL14642.Contig3	comp28266_c0_seq4	35.0978	4.48e-07	+
	Unigene1330	2 1249 minus strand eukaryotic translation initiation factor 4B1 [Arabidopsis thaliana] >gi|9294299|dbj|BAB02201.1| eukaryotic initiation factor 4B [Arabidopsis thaliana] >gi|332643632|gb|AEE77153.1| eukaryotic translation initiation factor 4B1		7	132	1.341			Unigene1330	comp10872_c0_seq1	32.853	0.00455443
	Unigene25700	2 2614 minus strand glycosyl hydrolase family 38 protein [Arabidopsis lyrata subsp. lyrata] >gi|297317431|gb|EFH47853.1| glycosyl hydrolase family 38 protein [Arabidopsis lyrata subsp. lyrata]		21	600	0.572	*	-	Unigene25700	comp31343_c1_seq1	0.082478	1
	Unigene22697	96 833 proteasome subunit alpha type-6-B [Arabidopsis thaliana] >gi|12229902|sp|O81147.1|PSA6B_ARATH RecName: Full=Proteasome subunit alpha type-6-B; AltName: Full=20S proteasome subunit alpha A-2; AltName: Full=Proteasome subunit alpha type-1 >g		9	170	0.948			Unigene22697	comp68729_c0_seq1	0.154211	1
	CL10110.Contig2	61 1329 minus strand hypothetical protein ARALYDRAFT_888076 [Arabidopsis lyrata subsp. lyrata] >gi|297338299|gb|EFH68716.1| hypothetical protein ARALYDRAFT_888076 [Arabidopsis lyrata subsp. lyrata]		6	238	2.147	*	+	CL10110.Contig2	comp24392_c0_seq1	-1.47885	0.0905277
	CL11249.Contig1	197 1732 minus strand hypothetical protein ARALYDRAFT_496464 [Arabidopsis lyrata subsp. lyrata] >gi|297310655|gb|EFH41079.1| hypothetical protein ARALYDRAFT_496464 [Arabidopsis lyrata subsp. lyrata]		2	87	0.879			CL11249.Contig1	comp27170_c0_seq4	-34.1653	3.58e-05	-
	CL3995.Contig3	389 1402 minus strand nucleic acid binding protein [Arabidopsis lyrata subsp. lyrata] >gi|297330653|gb|EFH61072.1| nucleic acid binding protein [Arabidopsis lyrata subsp. lyrata]	CL3995.Contig4	2	64	0.995			CL3995.Contig3	comp30837_c1_seq1	-0.952716	0.307743
	Unigene18548	3 455 hypothetical protein ARALYDRAFT_485150 [Arabidopsis lyrata subsp. lyrata] >gi|297323419|gb|EFH53840.1| hypothetical protein ARALYDRAFT_485150 [Arabidopsis lyrata subsp. lyrata]		4	82	0.498	*	-	Unigene18548	comp31741_c0_seq44	0.365711	0.844095
	Unigene8011	26 466 minus strand uncharacterized protein [Arabidopsis thaliana] >gi|107738190|gb|ABF83658.1| At1g55265 [Arabidopsis thaliana] >gi|332195095|gb|AEE33216.1| uncharacterized protein [Arabidopsis thaliana]		3	91	0.794			Unigene8011	comp33347_c0_seq1	0.167398	0.947992
	Unigene30105	36 425 minus strand nucleotide-sensitive chloride conductance regulator family protein [Arabidopsis thaliana] >gi|332010209|gb|AED97592.1| nucleotide-sensitive chloride conductance regulator family protein [Arabidopsis thaliana]		2	75	0.609			Unigene30105	comp11019_c0_seq1	-0.077115	1
	CL1956.Contig1	186 644 minus strand ubiquitin-conjugating enzyme E2 36 [Arabidopsis thaliana] >gi|75334547|sp|Q9FZ48.1|UBC36_ARATH RecName: Full=Ubiquitin-conjugating enzyme E2 36; AltName: Full=Ubiquitin carrier protein 36 >gi|15450413|gb|AAK96500.1| At1g1689	CL1956.Contig2 CL1956.Contig6 CL1956.Contig7	2	96	0.76			CL1956.Contig1	comp29227_c0_seq1	-0.0340193	1
	CL14456.Contig1	94 1533 minus strand neurofilament protein-related protein [Arabidopsis thaliana] >gi|332640792|gb|AEE74313.1| neurofilament protein-related protein [Arabidopsis thaliana]		11	248	1.2	*		CL14456.Contig1	comp29869_c0_seq1	-0.60829	0.603252
	CL7810.Contig2	65 1264 hypothetical protein ARALYDRAFT_896742 [Arabidopsis lyrata subsp. lyrata] >gi|297328301|gb|EFH58720.1| hypothetical protein ARALYDRAFT_896742 [Arabidopsis lyrata subsp. lyrata]		2	89	1.032			CL7810.Contig2	comp30358_c0_seq1	-0.0305724	1
	CL9224.Contig1	1 540 minus strand legume lectin family protein [Arabidopsis lyrata subsp. lyrata] >gi|297337568|gb|EFH67985.1| legume lectin family protein [Arabidopsis lyrata subsp. lyrata]		4	131	0.834			CL9224.Contig1	comp38885_c0_seq1	3.06466	0.00130291
	Unigene28894	262 513 minus strand hypothetical protein ARALYDRAFT_896937 [Arabidopsis lyrata subsp. lyrata] >gi|297330502|gb|EFH60921.1| hypothetical protein ARALYDRAFT_896937 [Arabidopsis lyrata subsp. lyrata]	Unigene31498	2	83	1.025			Unigene28894	comp50762_c0_seq1	-0.0384346	1
	Unigene20631	47 631 alpha-glucosidase 1 [Arabidopsis thaliana]		3	106	0.94			Unigene20631	comp29074_c0_seq1	-1.22543	0.166411
	Unigene30215	71 649 unnamed protein product [Thellungiella halophila]		4	169	1.077			Unigene30215	comp26289_c0_seq11	-2.05144	0.279222
	CL12427.Contig1	25 513 AT4g33720 [Arabidopsis thaliana] >gi|3549674|emb|CAA20585.1| pathogenesis-related protein 1 precursor, 19.3K [Arabidopsis thaliana] >gi|7270321|emb|CAB80089.1| pathogenesis-related protein 1 precursor, 19.3K [Arabidopsis thaliana] >gi|1451		3	190	1.435			CL12427.Contig1	comp32394_c0_seq1	-6.89701	3.85e-12	-
	CL3379.Contig1	77 754 hypothetical protein ARALYDRAFT_486034 [Arabidopsis lyrata subsp. lyrata] >gi|297323889|gb|EFH54310.1| hypothetical protein ARALYDRAFT_486034 [Arabidopsis lyrata subsp. lyrata]		3	95	1.143			CL3379.Contig1	comp26679_c0_seq1	0.87256	0.460791
	CL11402.Contig1	110 1198 reversibly glycosylated polypeptide-3 [Arabidopsis lyrata subsp. lyrata] >gi|297317514|gb|EFH47936.1| reversibly glycosylated polypeptide-3 [Arabidopsis lyrata subsp. lyrata]	CL11402.Contig2	14	459	1.784	*	+	CL11402.Contig1	comp31003_c0_seq4	-0.798975	0.510247
	CL629.Contig1	132 383 minus strand unknown [Medicago truncatula] >gi|388490658|gb|AFK33395.1| unknown [Medicago truncatula] >gi|388509374|gb|AFK42753.1| unknown [Medicago truncatula]	CL629.Contig2 CL629.Contig3 CL629.Contig4 Unigene21083 Unigene21084 Unigene21085	16	499	0.457			CL629.Contig1	comp10465_c0_seq1	-0.409993	0.804393
	CL10204.Contig1	244 2130 hypothetical protein ARALYDRAFT_490390 [Arabidopsis lyrata subsp. lyrata] >gi|297318708|gb|EFH49130.1| hypothetical protein ARALYDRAFT_490390 [Arabidopsis lyrata subsp. lyrata]		3	134	1.14			CL10204.Contig1	comp32440_c0_seq1	-6.76701	1.1e-12	-
	Unigene26084	150 1271 ribokinase [Arabidopsis thaliana] >gi|119360041|gb|ABL66749.1| At1g17160 [Arabidopsis thaliana] >gi|332191431|gb|AEE29552.1| ribokinase [Arabidopsis thaliana]		4	142	0.807			Unigene26084	comp29537_c0_seq1	-2.43487	0.00444367
	CL1543.Contig4	2 580 HSC70-1 [Arabidopsis lyrata subsp. lyrata] >gi|297318893|gb|EFH49315.1| HSC70-1 [Arabidopsis lyrata subsp. lyrata]		2	716	2.372			CL1543.Contig4	comp27505_c2_seq5	-1.13921	0.345009
	Unigene23632	104 1624 Serine carboxypeptidase S28 family protein [Arabidopsis thaliana] >gi|95147306|gb|ABF57288.1| At5g65760 [Arabidopsis thaliana] >gi|110736177|dbj|BAF00060.1| lysosomal Pro-X carboxypeptidase [Arabidopsis thaliana] >gi|332010719|gb|AED9810		6	181	0.877			Unigene23632	comp30642_c0_seq1	-1.23811	0.223279
	CL1605.Contig4	72 578 minus strand hypothetical protein ARALYDRAFT_491553 [Arabidopsis lyrata subsp. lyrata] >gi|297315146|gb|EFH45569.1| hypothetical protein ARALYDRAFT_491553 [Arabidopsis lyrata subsp. lyrata]		6	220	1.818			CL1605.Contig4	comp24022_c0_seq3	33.7782	0.000152415	+
	CL8111.Contig3	101 1450 tubulin alpha-6 chain [Arabidopsis thaliana] >gi|267070|sp|P29511.1|TBA6_ARATH RecName: Full=Tubulin alpha-6 chain >gi|166920|gb|AAA32892.1| TUA6 [Arabidopsis thaliana] >gi|2244853|emb|CAB10275.1| tubulin alpha-6 chain (TUA6) [Arabidopsi		16	1163	0.995			CL8111.Contig3	comp23362_c2_seq1	0.197244	0.945094
	CL1427.Contig1	630 1376 minus strand Contains a weak similarity to a farnesylated protein GMFP5 mRNA from Glycine max gb|U64916. ESTs gb|AI993148, gb|T44360 come from this gene [Arabidopsis thaliana]	CL1427.Contig2 CL1427.Contig3 CL1427.Contig4 CL1427.Contig5 CL1427.Contig6 CL1427.Contig7 CL1427.Contig8 CL1427.Contig9	4	128	1.986			CL1427.Contig1	comp20083_c0_seq3	6.83958	6.87e-05	+
	Unigene27835	127 744 minus strand cold induced protein [Brassica rapa]		6	321	1.981	*	+	Unigene27835	comp11430_c0_seq1	0.71764	0.690501
	CL5990.Contig1	2 355 minus strand hypothetical protein ARALYDRAFT_897956 [Arabidopsis lyrata subsp. lyrata] >gi|297328847|gb|EFH59266.1| hypothetical protein ARALYDRAFT_897956 [Arabidopsis lyrata subsp. lyrata]		4	141	1.171	*		CL5990.Contig1	comp13627_c0_seq1	-1.20836	0.780368
	CL9536.Contig1	119 1042 minus strand smad nuclear-interacting protein 1 [Arabidopsis thaliana] >gi|75162460|sp|Q8W4D8.1|DDL_ARATH RecName: Full=FHA domain-containing protein DDL; AltName: Full=Protein DAWDLE >gi|332642873|gb|AEE76394.1| smad nuclear-interactin	CL9536.Contig2	2	75	1.092			CL9536.Contig1	comp17592_c0_seq1	3.81401	0.000439687	+
	CL11454.Contig1	101 2272 minus strand acyl-activating enzyme 17 [Arabidopsis lyrata subsp. lyrata] >gi|297319946|gb|EFH50368.1| acyl-activating enzyme 17 [Arabidopsis lyrata subsp. lyrata]	CL11454.Contig2	4	127	1.224			CL11454.Contig1	comp12467_c0_seq2	-0.186606	0.944674
	Unigene8067	114 1253 minus strand GDSL esterase/lipase [Arabidopsis thaliana] >gi|75273423|sp|Q9LIN2.1|GDL53_ARATH RecName: Full=GDSL esterase/lipase At3g26430; AltName: Full=Extracellular lipase At3g26430; Flags: Precursor >gi|9294302|dbj|BAB02204.1| nodul		4	79	0.45	*	-	Unigene8067	comp26222_c0_seq1	-0.141245	0.976035
	Unigene27217	108 851 hypothetical protein ARALYDRAFT_917224 [Arabidopsis lyrata subsp. lyrata] >gi|297311223|gb|EFH41647.1| hypothetical protein ARALYDRAFT_917224 [Arabidopsis lyrata subsp. lyrata]	Unigene27220	10	176	1.334			Unigene27217	comp26903_c0_seq1	33.1477	0.00170759
	CL3718.Contig1	3 2117 minus strand vesicle-fusing ATPase [Arabidopsis thaliana] >gi|28201831|sp|Q9M0Y8.2|NSF_ARATH RecName: Full=Vesicle-fusing ATPase; AltName: Full=N-ethylmaleimide-sensitive fusion protein; AltName: Full=Vesicular-fusion protein NSF >gi|2085	CL3718.Contig2	11	297	1.214			CL3718.Contig1	comp10806_c0_seq1	-3.55886	0.000814016	-
	Unigene24472	149 829 hypothetical protein ARALYDRAFT_475014 [Arabidopsis lyrata subsp. lyrata] >gi|297332245|gb|EFH62663.1| hypothetical protein ARALYDRAFT_475014 [Arabidopsis lyrata subsp. lyrata]		8	124	0.464	*	-	Unigene24472	comp27683_c0_seq1	-1.27249	0.231955
	CL10649.Contig1	46 1488 minus strand unnamed protein product [Thellungiella halophila]		7	181	0.643	*	-	CL10649.Contig1	comp35769_c0_seq1	1.24989	0.161619
	CL11706.Contig1	73 786 minus strand NDPK III [Brassica rapa]		6	104	2.203	*	+	CL11706.Contig1	comp65163_c0_seq1	30.9733	0.205076
	CL3867.Contig1	101 1276 pfkB-type carbohydrate kinase family protein [Arabidopsis lyrata subsp. lyrata] >gi|297332879|gb|EFH63297.1| pfkB-type carbohydrate kinase family protein [Arabidopsis lyrata subsp. lyrata]		3	87	1.242			CL3867.Contig1	comp30962_c0_seq1	0.730947	0.609414
	CL1230.Contig1	150 818 minus strand membrane-associated progesterone binding protein 3 [Arabidopsis lyrata subsp. lyrata] >gi|297321769|gb|EFH52190.1| membrane-associated progesterone binding protein 3 [Arabidopsis lyrata subsp. lyrata]	CL1230.Contig2	8	248	1.185			CL1230.Contig1	comp27540_c0_seq1	-0.999947	0.273152
	CL100.Contig6	55 1734 minus strand hypothetical protein ARALYDRAFT_895064 [Arabidopsis lyrata subsp. lyrata] >gi|297333259|gb|EFH63677.1| hypothetical protein ARALYDRAFT_895064 [Arabidopsis lyrata subsp. lyrata]		5	295	1.256			CL100.Contig6	comp44786_c0_seq1	0.139564	0.982385
	CL7528.Contig1	932 1414 jasmonate inducible protein [Brassica napus]	CL7528.Contig2	5	304	1.159			CL7528.Contig1	comp24932_c0_seq6	0.0460925	1
	CL8754.Contig1	113 592 minus strand kinetochore protein [Brassica juncea]		3	68	1.865			CL8754.Contig1	comp30414_c0_seq3	1.53826	0.443609
	Unigene26265	1 315 minus strand tubulin beta-2 [Arabidopsis lyrata subsp. lyrata] >gi|297323357|gb|EFH53778.1| tubulin beta-2 [Arabidopsis lyrata subsp. lyrata]		5	615	0.646	*	-	Unigene26265	comp29840_c2_seq2	1.62639	0.057504
	Unigene11141	143 589 minus strand uncharacterized protein [Arabidopsis thaliana] >gi|3201620|gb|AAC20727.1| expressed protein [Arabidopsis thaliana] >gi|330253366|gb|AEC08460.1| uncharacterized protein [Arabidopsis thaliana]		2	114	1.376			Unigene11141	comp18178_c0_seq1	-2.12263	0.0394131
	Unigene28306	305 613 minus strand hypothetical protein ARALYDRAFT_910389 [Arabidopsis lyrata subsp. lyrata] >gi|297319984|gb|EFH50406.1| hypothetical protein ARALYDRAFT_910389 [Arabidopsis lyrata subsp. lyrata]		9	279	0.971			Unigene28306	comp31281_c0_seq5	-0.322016	0.857956
	Unigene29796	59 379 Chain A, Solution Structure Of Hypothetical Arabidopsis Thaliana Protein At3g17210. Center For Eukaryotic Structural Genomics Target 13081 >gi|159162872|pdb|1Q53|B Chain B, Solution Structure Of Hypothetical Arabidopsis Thaliana Protein At		2	46	0.832			Unigene29796	comp33229_c0_seq1	0.260193	0.88329
	CL512.Contig5	144 1316 minus strand metallopeptidase M24 domain-containing protein [Arabidopsis thaliana] >gi|21311299|gb|AAM46648.1|AF422841_1 cell cycle-related nuclear binding protein [Arabidopsis thaliana] >gi|1657617|gb|AAB18127.1| G2p [Arabidopsis thali		8	300	0.924			CL512.Contig5	comp30317_c0_seq1	-0.0925971	0.997274
	Unigene19558	68 1237 pyruvate dehydrogenase complex E1 alpha subunit dehydrogenase [Brassica rapa]		10	281	1.152			Unigene19558	comp33159_c0_seq1	1.15855	0.195187
	CL9546.Contig1	152 1504 clathrin adaptor complexes medium subunit family protein [Arabidopsis lyrata subsp. lyrata] >gi|297315548|gb|EFH45971.1| clathrin adaptor complexes medium subunit family protein [Arabidopsis lyrata subsp. lyrata]		2	82	1.153	*		CL9546.Contig1	comp28213_c0_seq2	-0.864662	0.412295
	CL9193.Contig2	44 541 peroxidase [Arabidopsis thaliana] >gi|25453217|sp|Q9SJZ2.1|PER17_ARATH RecName: Full=Peroxidase 17; Short=Atperox P17; AltName: Full=ATP25a; Flags: Precursor >gi|330252207|gb|AEC07301.1| peroxidase [Arabidopsis thaliana]		7	146	0.651	*	-	CL9193.Contig2	comp27040_c0_seq2	-1.24037	0.266778
	CL731.Contig2	2 259 putative aspartyl protease [Arabidopsis thaliana]		2	104	0.654			CL731.Contig2	comp23329_c0_seq2	34.6213	3.92e-06	+
	CL2581.Contig2	217 1740 glucan endo-1,3-beta-glucosidase 7 [Arabidopsis thaliana] >gi|259016223|sp|Q9M069.2|E137_ARATH RecName: Full=Glucan endo-1,3-beta-glucosidase 7; AltName: Full=(1->3)-beta-glucan endohydrolase 7; Short=(1->3)-beta-glucanase 7; AltName: Fu		3	288	0.838			CL2581.Contig2	comp23596_c0_seq1	-2.06956	0.0123959
	CL13335.Contig1	94 363 minus strand histidyl-tRNA synthetase [Arabidopsis thaliana] >gi|332640336|gb|AEE73857.1| histidyl-tRNA synthetase [Arabidopsis thaliana]		2	56	1.136			CL13335.Contig1	comp12834_c0_seq1	-0.20836	1
	CL4097.Contig2	162 1133 minus strand heat shock protein binding protein [Arabidopsis lyrata subsp. lyrata] >gi|297335159|gb|EFH65577.1| heat shock protein binding protein [Arabidopsis lyrata subsp. lyrata]		2	42	1.101			CL4097.Contig2	comp27649_c0_seq2	1.7289	0.543022
	CL2459.Contig1	2 1066 minus strand hypothetical protein ARALYDRAFT_471639 [Arabidopsis lyrata subsp. lyrata] >gi|297338660|gb|EFH69077.1| hypothetical protein ARALYDRAFT_471639 [Arabidopsis lyrata subsp. lyrata]		2	59	0.854			CL2459.Contig1	comp32167_c0_seq1	34.983	7.62e-07	+
	CL8136.Contig1	117 1160 glycosyl hydrolase family 17 protein [Arabidopsis lyrata subsp. lyrata] >gi|297310305|gb|EFH40729.1| glycosyl hydrolase family 17 protein [Arabidopsis lyrata subsp. lyrata]	CL8136.Contig2	2	70	0.873			CL8136.Contig1	comp27384_c0_seq2	-32.1817	0.0251893
	Unigene20359	5 721 minus strand predicted protein [Arabidopsis lyrata subsp. lyrata] >gi|297340299|gb|EFH70716.1| predicted protein [Arabidopsis lyrata subsp. lyrata]		3	119	0.937			Unigene20359	comp29997_c0_seq1	-0.613616	0.622708
	CL9570.Contig1	122 1216 unnamed protein product [Thellungiella halophila]		10	312	0.423	*	-	CL9570.Contig1	comp18271_c0_seq1	2.92092	0.00135711
	Unigene18094	2 310 AT3G59760 [Arabidopsis thaliana]		2	348	0.921			Unigene18094	comp28941_c0_seq10	-2.15278	0.461399
	CL279.Contig2	63 1502 minus strand RecName: Full=Probable UDP-glucose 6-dehydrogenase 2; Short=UDP-Glc dehydrogenase 2; Short=UDP-GlcDH 2; Short=UDPGDH 2 >gi|10177680|dbj|BAB11006.1| UDP-glucose dehydrogenase [Arabidopsis thaliana]	CL279.Contig3	13	847	1.186			CL279.Contig2	comp30284_c0_seq2	3.08835	0.000265753	+
	CL5702.Contig5	75 1577 minus strand ketose-bisphosphate aldolase class-II family protein [Arabidopsis lyrata subsp. lyrata] >gi|297338835|gb|EFH69252.1| ketose-bisphosphate aldolase class-II family protein [Arabidopsis lyrata subsp. lyrata]	CL5702.Contig6	3	52	0.91			CL5702.Contig5	comp11716_c0_seq2	-0.526998	0.643979
	CL5695.Contig1	138 1901 ATPME1 [Arabidopsis lyrata subsp. lyrata] >gi|297337617|gb|EFH68034.1| ATPME1 [Arabidopsis lyrata subsp. lyrata]		4	114	0.906			CL5695.Contig1	comp55628_c0_seq1	-2.66779	0.139691
	CL12930.Contig1	2 115 homolog of anti-oxidant 1 [Arabidopsis thaliana] >gi|14532548|gb|AAK64002.1| At1g66240/T6J19_6 [Arabidopsis thaliana] >gi|18655401|gb|AAL76156.1| At1g66240/T6J19_6 [Arabidopsis thaliana] >gi|332196360|gb|AEE34481.1| homolog of anti-oxidant		7	263	0.85			CL12930.Contig1	comp22458_c1_seq1	-0.829848	0.489076
	Unigene13989	141 476 minus strand putative cysteine proteinase inhibitor [Arabidopsis thaliana]		2	61	1.373			Unigene13989	comp32552_c0_seq1	-1.17011	0.194336
	CL783.Contig2	5 823 Peptidyl-prolyl cis-trans isomerase CYP20-3 [Arabidopsis thaliana] >gi|332646777|gb|AEE80298.1| Peptidyl-prolyl cis-trans isomerase CYP20-3 [Arabidopsis thaliana]		3	165	0.629	*	-	CL783.Contig2	comp118315_c0_seq1	0.376603	1
	Unigene22394	260 715 hypothetical protein ARALYDRAFT_483146 [Arabidopsis lyrata subsp. lyrata] >gi|297325733|gb|EFH56153.1| hypothetical protein ARALYDRAFT_483146 [Arabidopsis lyrata subsp. lyrata]		2	112	1.084			Unigene22394	comp31875_c0_seq1	0.497909	0.692145
	CL14339.Contig1	187 438 minus strand glutamate decarboxylase 2 [Brassica juncea]		9	226	2.708			CL14339.Contig1	comp27380_c0_seq1	-3.41223	0.000283569	-
	Unigene9733	2 619 hydrolase, acting on glycosyl bonds [Arabidopsis lyrata subsp. lyrata] >gi|297316998|gb|EFH47420.1| hydrolase, acting on glycosyl bonds [Arabidopsis lyrata subsp. lyrata]		2	44	0.804			Unigene9733	comp30259_c0_seq3	1.81817	0.249803
	Unigene28781	2 592 predicted protein [Arabidopsis lyrata subsp. lyrata] >gi|297340405|gb|EFH70822.1| predicted protein [Arabidopsis lyrata subsp. lyrata]		2	33	0.777			Unigene28781	comp30225_c0_seq5	-1.76026	0.151889
	Unigene28395	102 1922 minus strand pyruvate decarboxylase-2 [Arabidopsis lyrata subsp. lyrata] >gi|297311904|gb|EFH42328.1| pyruvate decarboxylase-2 [Arabidopsis lyrata subsp. lyrata]		19	913	1.3	*	+	Unigene28395	comp26357_c0_seq1	-0.87935	0.351405
	Unigene8275	49 777 tubulin folding cofactor B [Arabidopsis thaliana] >gi|51970508|dbj|BAD43946.1| tubulin folding cofactor B [Arabidopsis thaliana] >gi|51970674|dbj|BAD44029.1| tubulin folding cofactor B [Arabidopsis thaliana] >gi|332641352|gb|AEE74873.1| tu		2	89	1.618			Unigene8275	comp23886_c0_seq1	-7.23339	5.47e-08	-
	CL5372.Contig1	49 1074 minus strand hypothetical protein ARALYDRAFT_489969 [Arabidopsis lyrata subsp. lyrata] >gi|297318419|gb|EFH48841.1| hypothetical protein ARALYDRAFT_489969 [Arabidopsis lyrata subsp. lyrata]		7	272	1.193			CL5372.Contig1	comp31809_c0_seq1	-0.0157145	1
	CL3940.Contig1	335 1147 dehydrin [Brassica napus]		56	1085	1.563			CL3940.Contig1	comp19702_c0_seq3	1.599	0.461399
	CL10949.Contig3	247 1926 unnamed protein product [Thellungiella halophila]	CL10949.Contig5	18	535	1.274	*	+	CL10949.Contig3	comp24959_c0_seq1	-1.45954	0.0946385
	CL12935.Contig1	168 917 minus strand proteasome subunit alpha type-7-A [Arabidopsis thaliana] >gi|266839|sp|P30186.1|PSA7A_ARATH RecName: Full=Proteasome subunit alpha type-7-A; AltName: Full=20S proteasome alpha subunit D-1; AltName: Full=Proteasome component	CL12935.Contig2	6	177	1.027			CL12935.Contig1	comp29029_c0_seq1	0.160281	0.947992
	CL11912.Contig1	81 215 wound-responsive-related protein [Arabidopsis thaliana] >gi|30102792|gb|AAP21314.1| At3g07230 [Arabidopsis thaliana] >gi|332640996|gb|AEE74517.1| wound-responsive-related protein [Arabidopsis thaliana]		2	70	0.883			CL11912.Contig1	comp21432_c0_seq1	32.9733	0.00275059
	CL643.Contig1	2 1975 minus strand SIT4 phosphatase-associated family protein [Arabidopsis thaliana] >gi|22022590|gb|AAM83251.1| At1g07990/T6D22_5 [Arabidopsis thaliana] >gi|28416501|gb|AAO42781.1| At1g07990/T6D22_5 [Arabidopsis thaliana] >gi|332190103|gb|AEE2		3	167	0.793	*	-	CL643.Contig1	comp32027_c0_seq2	-0.816356	0.429821
	Unigene24322	72 1244 pectin acetylesterase [Arabidopsis lyrata subsp. lyrata] >gi|297311088|gb|EFH41512.1| pectin acetylesterase [Arabidopsis lyrata subsp. lyrata]		19	544	0.805			Unigene24322	comp27484_c1_seq1	-0.852516	0.437461
	Unigene25390	3 1019 monodehydroascorbate reductase [Brassica oleracea]	Unigene25391	8	237	1.05			Unigene25390	comp34211_c0_seq1	0.522454	0.649021
	CL7549.Contig3	285 3137 minus strand hypothetical protein ARALYDRAFT_484098 [Arabidopsis lyrata subsp. lyrata] >gi|297322618|gb|EFH53039.1| hypothetical protein ARALYDRAFT_484098 [Arabidopsis lyrata subsp. lyrata]	CL7549.Contig4	8	161	0.891			CL7549.Contig3	comp31287_c0_seq1	1.27099	0.14532
	CL1867.Contig2	146 1612 hypothetical protein ARALYDRAFT_491942 [Arabidopsis lyrata subsp. lyrata] >gi|297315347|gb|EFH45770.1| hypothetical protein ARALYDRAFT_491942 [Arabidopsis lyrata subsp. lyrata]	CL1867.Contig3 CL1867.Contig4 CL1867.Contig5	3	170	0.879			CL1867.Contig2	comp14702_c0_seq1	-1.56591	0.141495
	CL10163.Contig2	122 883 BAG family molecular chaperone regulator 4 OS=Arabidopsis thaliana GN=BAG4 PE=1 SV=1		6	216	1.17			CL10163.Contig2	comp20829_c0_seq1	-0.256056	0.889098
	CL8601.Contig4	114 755 F17L21.18 [Arabidopsis lyrata subsp. lyrata] >gi|297339307|gb|EFH69724.1| F17L21.18 [Arabidopsis lyrata subsp. lyrata]		4	61	0.82			CL8601.Contig4	comp32040_c0_seq1	-0.326969	0.842596
	Unigene6748	83 268 minus strand 40S ribosomal protein S30 [Arabidopsis thaliana] >gi|15241895|ref|NP_200478.1| 40S ribosomal protein S30 [Arabidopsis thaliana] >gi|18399137|ref|NP_565458.1| 40S ribosomal protein S30 [Arabidopsis thaliana] >gi|297796551|ref|	CL7832.Contig1 CL7832.Contig2	9	122	0.909			Unigene6748	comp24223_c0_seq4	-0.556164	0.726169
	Unigene20694	3 4670 transducin/WD40 domain-containing protein [Arabidopsis thaliana] >gi|332645163|gb|AEE78684.1| transducin/WD40 domain-containing protein [Arabidopsis thaliana]		4	123	0.969			Unigene20694	comp31800_c0_seq1	0.293877	0.844325
	CL9256.Contig2	90 605 hypothetical protein ARALYDRAFT_907902 [Arabidopsis lyrata subsp. lyrata] >gi|297322550|gb|EFH52971.1| hypothetical protein ARALYDRAFT_907902 [Arabidopsis lyrata subsp. lyrata]		5	109	0.966			CL9256.Contig2	comp20593_c0_seq1	32.9783	0.00275059
	CL14120.Contig1	18 1676 minus strand predicted protein [Arabidopsis lyrata subsp. lyrata] >gi|297329476|gb|EFH59895.1| predicted protein [Arabidopsis lyrata subsp. lyrata]		10	306	1.57	*	+	CL14120.Contig1	comp30061_c0_seq1	-0.871325	0.43003
	CL2540.Contig2	130 1167 transducin family protein [Arabidopsis lyrata subsp. lyrata] >gi|297333657|gb|EFH64075.1| transducin family protein [Arabidopsis lyrata subsp. lyrata]		10	372	0.644	*	-	CL2540.Contig2	comp28495_c0_seq8	-1.14391	0.889098
	CL4839.Contig1	2 535 minus strand hypothetical protein ARALYDRAFT_477850 [Arabidopsis lyrata subsp. lyrata] >gi|297328267|gb|EFH58686.1| hypothetical protein ARALYDRAFT_477850 [Arabidopsis lyrata subsp. lyrata]		4	196	1.939			CL4839.Contig1	comp27577_c0_seq2	1.81808	0.249803
	CL3092.Contig1	84 686 minus strand ankyrin repeat-containing protein [Arabidopsis thaliana] >gi|89001029|gb|ABD59104.1| At3g09890 [Arabidopsis thaliana] >gi|332641305|gb|AEE74826.1| ankyrin repeat-containing protein [Arabidopsis thaliana]		2	57	1.025			CL3092.Contig1	comp25898_c0_seq1	0.154211	0.976035
	CL2232.Contig2	67 1719 pectin methylesterase-like protein [Arabidopsis thaliana]		8	394	0.627	*	-	CL2232.Contig2	comp28818_c0_seq2	0.527631	0.671396
	CL3466.Contig1	3 2105 minus strand hypothetical protein ARALYDRAFT_909689 [Arabidopsis lyrata subsp. lyrata] >gi|297317583|gb|EFH48005.1| hypothetical protein ARALYDRAFT_909689 [Arabidopsis lyrata subsp. lyrata]	CL3466.Contig2 CL3466.Contig5	2	72	1.479			CL3466.Contig1	comp24474_c0_seq1	-0.286362	0.964129
	Unigene2114	102 437 minus strand 60S ribosomal protein L30 [Arabidopsis lyrata subsp. lyrata] >gi|297846666|ref|XP_002891214.1| 60S ribosomal protein L30 [Arabidopsis lyrata subsp. lyrata] >gi|297328987|gb|EFH59406.1| 60S ribosomal protein L30 [Arabidopsis	CL9478.Contig2 CL9478.Contig3 Unigene14412	5	175	0.804			Unigene2114	comp25350_c0_seq6	0.771642	0.459763
	CL1349.Contig1	99 644 40S ribosomal protein S10-1 [Arabidopsis thaliana] >gi|20139845|sp|Q9SW09.1|RS101_ARATH RecName: Full=40S ribosomal protein S10-1 >gi|332659707|gb|AEE85107.1| 40S ribosomal protein S10-1 [Arabidopsis thaliana]	CL1349.Contig5 CL1349.Contig6	3	106	0.729			CL1349.Contig1	comp48017_c0_seq1	1.11357	0.440882
	CL2780.Contig1	2 964 hypothetical protein ARALYDRAFT_489472 [Arabidopsis lyrata subsp. lyrata] >gi|297318048|gb|EFH48470.1| hypothetical protein ARALYDRAFT_489472 [Arabidopsis lyrata subsp. lyrata]		2	154	1.226			CL2780.Contig1	comp31928_c0_seq4	-0.639326	0.559376
	Unigene4747	315 533 minus strand beta-galactosidase 8 [Arabidopsis thaliana] >gi|152013364|sp|Q9SCV4.2|BGAL8_ARATH RecName: Full=Beta-galactosidase 8; Short=Lactase 8; AltName: Full=Protein AR782; Flags: Precursor >gi|330253033|gb|AEC08127.1| beta-galactosi		3	71	1.01			Unigene4747	comp41560_c0_seq1	2.05467	0.0976984
	CL1942.Contig1	25 438 minus strand chloroplast chaperonin 10 [Brassica rapa]	CL1942.Contig2	6	351	0.756	*	-	CL1942.Contig1	comp21284_c0_seq2	0.552254	0.710065
	CL5086.Contig1	54 1031 Papain family cysteine protease [Arabidopsis thaliana] >gi|2244977|emb|CAB10398.1| cysteine proteinase like protein [Arabidopsis thaliana] >gi|7268368|emb|CAB78661.1| cysteine proteinase like protein [Arabidopsis thaliana] >gi|14517442|gb		3	109	0.674			CL5086.Contig1	comp25153_c2_seq1	-1.32929	0.125601
	CL1404.Contig1	72 944 minus strand expansin-like A2 [Arabidopsis thaliana] >gi|20138427|sp|Q9SVE5.1|EXLA2_ARATH RecName: Full=Expansin-like A2; Short=At-EXPL2; Short=AtEXLA2; Short=AtEXPL2; AltName: Full=Ath-ExpBeta-2.2; Flags: Precursor >gi|14190355|gb|AAK556	CL1404.Contig2	4	72	0.691			CL1404.Contig1	comp17646_c0_seq1	0.42907	0.924099
	CL13494.Contig2	1 774 minus strand hypothetical protein ARALYDRAFT_487662 [Arabidopsis lyrata subsp. lyrata] >gi|297317153|gb|EFH47575.1| hypothetical protein ARALYDRAFT_487662 [Arabidopsis lyrata subsp. lyrata]		6	267	1.158			CL13494.Contig2	comp15510_c0_seq1	-31.4447	0.139691
	CL452.Contig1	96 2435 minus strand alpha-L-arabinofuranosidase [Raphanus sativus]		9	138	0.526	*	-	CL452.Contig1	comp30454_c0_seq5	3.52567	4.07e-05	+
	CL5652.Contig2	1102 2928 minus strand Heat shock 70 kDa protein 10, mitochondrial OS=Arabidopsis thaliana GN=HSP70-10 PE=1 SV=1	Unigene28619 Unigene28620	17	1120	0.972			CL5652.Contig2	comp31038_c0_seq4	-0.792295	0.457051
	CL4937.Contig1	1 2004 minus strand T24D18.4 [Arabidopsis thaliana]		2	108	1.287			CL4937.Contig1	comp31323_c0_seq1	-1.00787	0.316119
	CL7610.Contig1	155 745 minus strand hypothetical protein ARALYDRAFT_477902 [Arabidopsis lyrata subsp. lyrata] >gi|297330393|gb|EFH60812.1| hypothetical protein ARALYDRAFT_477902 [Arabidopsis lyrata subsp. lyrata]		4	79	0.662			CL7610.Contig1	comp25936_c0_seq1	4.57195	1.74e-06	+
	Unigene11926	187 1644 predicted protein [Arabidopsis lyrata subsp. lyrata] >gi|297330644|gb|EFH61063.1| predicted protein [Arabidopsis lyrata subsp. lyrata]		7	163	0.812			Unigene11926	comp35527_c0_seq1	-0.44114	0.722734
	CL6863.Contig2	120 413 minus strand hypothetical protein ARALYDRAFT_493506 [Arabidopsis lyrata subsp. lyrata] >gi|297316174|gb|EFH46597.1| hypothetical protein ARALYDRAFT_493506 [Arabidopsis lyrata subsp. lyrata]		8	259	0.971			CL6863.Contig2	comp10359_c0_seq1	3.01403	0.0178596
	CL12264.Contig2	135 1739 minus strand dihydrolipoyllysine-residue acetyltransferase component 2 of pyruvate dehydrogenase complex [Arabidopsis thaliana] >gi|118573090|sp|Q8RWN9.2|OPD22_ARATH RecName: Full=Dihydrolipoyllysine-residue acetyltransferase component		11	415	0.842			CL12264.Contig2	comp14531_c0_seq1	0.168795	0.940741
	CL5981.Contig1	260 757 dimethylmenaquinone methyltransferase family protein [Arabidopsis lyrata subsp. lyrata] >gi|297330178|gb|EFH60597.1| dimethylmenaquinone methyltransferase family protein [Arabidopsis lyrata subsp. lyrata]	CL5981.Contig2 CL5981.Contig3 CL5981.Contig4 CL5981.Contig5 Unigene24138	18	391	0.408	*	-	CL5981.Contig1	comp27365_c0_seq4	-0.80981	0.510622
	Unigene13224	1 1098 SWAP/Surp domain-containing protein [Arabidopsis thaliana] >gi|30688961|ref|NP_849479.1| SWAP/Surp domain-containing protein [Arabidopsis thaliana] >gi|42573107|ref|NP_974650.1| SWAP/Surp domain-containing protein [Arabidopsis thaliana] >g		2	75	1.142			Unigene13224	comp24441_c0_seq1	0.0785216	1
	CL2844.Contig1	21 902 RecName: Full=Probable trans-2-enoyl-CoA reductase, mitochondrial; Flags: Precursor >gi|21592515|gb|AAM64465.1| nuclear receptor binding factor-like protein [Arabidopsis thaliana]	CL2844.Contig2	2	98	0.811			CL2844.Contig1	comp11100_c0_seq1	0.738033	0.543022
	CL11187.Contig1	5 841 minus strand hypothetical protein ARALYDRAFT_915472 [Arabidopsis lyrata subsp. lyrata] >gi|297314140|gb|EFH44563.1| hypothetical protein ARALYDRAFT_915472 [Arabidopsis lyrata subsp. lyrata]		2	49	0.947			CL11187.Contig1	comp30941_c0_seq2	33.1623	0.00170759
	CL1802.Contig2	68 406 minus strand unnamed protein product [Thellungiella halophila]		8	145	0.399	*	-	CL1802.Contig2	comp21987_c0_seq2	1.38989	0.263296
	CL4537.Contig4	96 1034 hypothetical protein ARALYDRAFT_913787 [Arabidopsis lyrata subsp. lyrata] >gi|297313335|gb|EFH43758.1| hypothetical protein ARALYDRAFT_913787 [Arabidopsis lyrata subsp. lyrata]	CL4537.Contig5	9	405	1.617	*	+	CL4537.Contig4	comp25916_c0_seq1	0.865409	0.544992
	Unigene7606	161 586 hypothetical protein ARALYDRAFT_909184 [Arabidopsis lyrata subsp. lyrata] >gi|297317349|gb|EFH47771.1| hypothetical protein ARALYDRAFT_909184 [Arabidopsis lyrata subsp. lyrata]		3	90	0.891			Unigene7606	comp10630_c0_seq1	-0.20836	1
	CL8320.Contig1	3 1079 minus strand pyruvate kinase, putative [Arabidopsis thaliana]		3	115	1.451			CL8320.Contig1	comp31040_c0_seq2	0.103159	1
	CL5610.Contig1	3 4463 minus strand ubiquitin-protein ligase 1 [Arabidopsis lyrata subsp. lyrata] >gi|297340375|gb|EFH70792.1| ubiquitin-protein ligase 1 [Arabidopsis lyrata subsp. lyrata]		4	186	0.866			CL5610.Contig1	comp30421_c0_seq4	1.08115	0.650152
	CL3677.Contig1	80 826 minus strand aconitase C-terminal domain-containing protein [Arabidopsis lyrata subsp. lyrata] >gi|297325862|gb|EFH56282.1| aconitase C-terminal domain-containing protein [Arabidopsis lyrata subsp. lyrata]	CL3677.Contig2	22	659	0.805	*	-	CL3677.Contig1	comp30587_c0_seq1	-0.0764249	1
	CL14498.Contig1	90 1001 protein transport protein SEC13 [Arabidopsis thaliana] >gi|15724344|gb|AAL06565.1|AF412112_1 At2g30050/F23F1.3 [Arabidopsis thaliana] >gi|21700867|gb|AAM70557.1| At2g30050/F23F1.3 [Arabidopsis thaliana] >gi|330253245|gb|AEC08339.1| protei		5	209	0.908			CL14498.Contig1	comp24774_c0_seq3	-0.704664	0.575075
	CL10026.Contig1	1 1689 protein transport protein SEC31 [Arabidopsis thaliana] >gi|332646967|gb|AEE80488.1| protein transport protein SEC31 [Arabidopsis thaliana]		9	322	0.862			CL10026.Contig1	comp29937_c0_seq3	0.424061	0.729462
	CL8949.Contig1	141 2045 phosphatidylserine decarboxylase 3 [Arabidopsis thaliana] >gi|126673483|gb|ABO26297.1| phosphatidylserine decarboxylase [Arabidopsis thaliana] >gi|332659738|gb|AEE85138.1| phosphatidylserine decarboxylase 3 [Arabidopsis thaliana]	CL8949.Contig2 CL8949.Contig3	3	160	1.065			CL8949.Contig1	comp31075_c0_seq2	-2.79362	0.00161679
	CL10949.Contig1	85 1752 minus strand 2,3-bisphosphoglycerate-independent phosphoglycerate mutase 1 [Arabidopsis thaliana] >gi|30316342|sp|O04499.3|PMG1_ARATH RecName: Full=2,3-bisphosphoglycerate-independent phosphoglycerate mutase 1; Short=BPG-independent PGAM		30	885	1.484			CL10949.Contig1	comp29510_c0_seq1	0.940687	0.306431
	CL1227.Contig1	5 1180 minus strand subtilisin-like protease [Arabidopsis thaliana]		11	362	0.503	*	-	CL1227.Contig1	comp28865_c0_seq6	-3.80138	0.0299205
	CL14486.Contig1	96 830 RNA recognition motif-containing protein [Arabidopsis thaliana] >gi|332009875|gb|AED97258.1| RNA recognition motif-containing protein [Arabidopsis thaliana]	CL14486.Contig2	14	476	1.118			CL14486.Contig1	comp20677_c0_seq1	0.251072	0.882433
	Unigene21249	2 952 minus strand CAAX prenyl protease 1-like protein [Arabidopsis thaliana] >gi|75303258|sp|Q8RX88.1|FACE1_ARATH RecName: Full=CAAX prenyl protease 1 homolog; AltName: Full=Farnesylated proteins-converting enzyme 1; Short=AtFACE-1; Short=FACE-		3	41	0.94			Unigene21249	comp19668_c0_seq1	-0.730312	0.478904
	Unigene5157	26 307 minus strand pectinesterase family protein [Arabidopsis lyrata subsp. lyrata] >gi|297320760|gb|EFH51182.1| pectinesterase family protein [Arabidopsis lyrata subsp. lyrata]		2	53	1.367			Unigene5157	comp26486_c1_seq1	-0.20836	0.961041
	CL10219.Contig1	1 1089 minus strand T-complex protein 1 subunit alpha OS=Arabidopsis thaliana GN=CCT1 PE=2 SV=1		8	276	1.48			CL10219.Contig1	comp31773_c0_seq2	0.742181	0.573244
	Unigene29809	2 316 peptidoglycan-binding LysM domain-containing protein [Arabidopsis lyrata subsp. lyrata] >gi|297336312|gb|EFH66729.1| peptidoglycan-binding LysM domain-containing protein [Arabidopsis lyrata subsp. lyrata]		2	53	0.793			Unigene29809	comp38323_c0_seq1	2.49208	0.035482
	CL8114.Contig1	144 482 minus strand hypothetical protein ARALYDRAFT_311324 [Arabidopsis lyrata subsp. lyrata] >gi|297335226|gb|EFH65643.1| hypothetical protein ARALYDRAFT_311324 [Arabidopsis lyrata subsp. lyrata]		3	125	1.216			CL8114.Contig1	comp26856_c0_seq6	0.848156	0.378492
	Unigene1295	77 1981 hypothetical protein ARALYDRAFT_909044 [Arabidopsis lyrata subsp. lyrata] >gi|297319317|gb|EFH49739.1| hypothetical protein ARALYDRAFT_909044 [Arabidopsis lyrata subsp. lyrata]		4	139	1.499			Unigene1295	comp32237_c0_seq4	1.09044	0.249803
	CL1102.Contig2	217 2037 minus strand proton pump interactor 1 [Arabidopsis thaliana] >gi|13992437|emb|CAA05145.2| proton pump interactor [Arabidopsis thaliana] >gi|15215674|gb|AAK91382.1| AT4g27500/F27G19_100 [Arabidopsis thaliana] >gi|23505987|gb|AAN28853.1|		2	205	3.257			CL1102.Contig2	comp29576_c0_seq1	-0.592313	0.590466
	CL1733.Contig5	100 717 60S ribosomal protein L13a-2 [Arabidopsis thaliana] >gi|17865564|sp|Q9LRX8.1|R13A2_ARATH RecName: Full=60S ribosomal protein L13a-2 >gi|11994665|dbj|BAB02893.1| 60S ribosomal protein L13A-like [Arabidopsis thaliana] >gi|332643430|gb|AEE76	CL1733.Contig6	2	110	1.747			CL1733.Contig5	comp25634_c0_seq2	0.601546	0.586137
	Unigene1157	213 797 DNA binding protein [Brassica rapa]		3	122	1.151			Unigene1157	comp25965_c0_seq2	35.601	3.59e-08	+
	Unigene514	3 851 unnamed protein product [Thellungiella halophila]	Unigene2087 Unigene2963	8	279	0.8			Unigene514	comp27544_c1_seq1	-0.22252	0.947992
	CL3632.Contig2	151 795 minus strand glutathione S-transferase [Arabidopsis thaliana] >gi|75318706|sp|O80852.1|GSTF9_ARATH RecName: Full=Glutathione S-transferase F9; Short=AtGSTF9; AltName: Full=AtGSTF7; AltName: Full=GST class-phi member 9 >gi|13926310|gb|AAK		11	302	1.07			CL3632.Contig2	comp29588_c0_seq2	-0.0426417	1
	Unigene289	78 935 minus strand S9 Tyrosyl aminopeptidase [Raphanus sativus]		8	127	2.699	*	+	Unigene289	comp29221_c0_seq2	2.94929	0.0497403
	CL1963.Contig10	343 1581 minus strand putative malate oxidoreductase [Arabidopsis thaliana]	CL1963.Contig11 CL1963.Contig6 CL1963.Contig8	8	133	1.098			CL1963.Contig10	comp31266_c0_seq12	-32.9666	0.0035335
	CL965.Contig10	2 214 RecName: Full=S-adenosylmethionine synthase 2; Short=AdoMet synthase 2; AltName: Full=Methionine adenosyltransferase 2; Short=MAT 2 >gi|304637|gb|AAA33274.1| S-adenosylmethionine synthetase [Dianthus caryophyllus] >gi|228314|prf||1802406A M		3	332	0.981			CL965.Contig10	comp2251_c0_seq1	-0.0157145	1
	CL6521.Contig1	110 892 minus strand 40S ribosomal protein S3A [Arabidopsis lyrata subsp. lyrata] >gi|297314967|gb|EFH45390.1| 40S ribosomal protein S3A [Arabidopsis lyrata subsp. lyrata]		2	207	1.323			CL6521.Contig1	comp31541_c0_seq5	1.02502	0.330468
	Unigene3032	1 486 minus strand hypothetical protein [Arabidopsis thaliana]		2	86	0.86			Unigene3032	comp27635_c0_seq2	33.3717	0.000705527	+
	CL7006.Contig1	86 1123 minus strand hypothetical protein ARALYDRAFT_899703 [Arabidopsis lyrata subsp. lyrata] >gi|297329700|gb|EFH60119.1| hypothetical protein ARALYDRAFT_899703 [Arabidopsis lyrata subsp. lyrata]	CL7006.Contig3	2	50	0.957			CL7006.Contig1	comp699_c0_seq1	0.206678	1
	CL8944.Contig1	268 3525 hypothetical protein ARALYDRAFT_476358 [Arabidopsis lyrata subsp. lyrata] >gi|297334708|gb|EFH65126.1| hypothetical protein ARALYDRAFT_476358 [Arabidopsis lyrata subsp. lyrata]		3	81	0.759			CL8944.Contig1	comp31536_c0_seq1	-0.323202	0.958382
	Unigene15052	2 376 AAA-type ATPase family protein [Arabidopsis lyrata subsp. lyrata] >gi|297318671|gb|EFH49093.1| AAA-type ATPase family protein [Arabidopsis lyrata subsp. lyrata]		2	38	0.553			Unigene15052	comp29172_c1_seq69	-1.61046	0.138412
	CL6279.Contig1	2 235 hypothetical protein ARALYDRAFT_489363 [Arabidopsis lyrata subsp. lyrata] >gi|297320076|gb|EFH50498.1| hypothetical protein ARALYDRAFT_489363 [Arabidopsis lyrata subsp. lyrata]		3	84	0.819			CL6279.Contig1	comp24257_c1_seq1	32.4317	0.0136901
	CL12901.Contig2	5 301 minus strand leucine-rich repeat family protein [Arabidopsis lyrata subsp. lyrata] >gi|297315756|gb|EFH46179.1| leucine-rich repeat family protein [Arabidopsis lyrata subsp. lyrata]		3	87	0.745			CL12901.Contig2	comp26615_c0_seq1	3.72341	8.62e-05	+
	CL8236.Contig1	76 1413 minus strand hypothetical protein ARALYDRAFT_485477 [Arabidopsis lyrata subsp. lyrata] >gi|297321914|gb|EFH52335.1| hypothetical protein ARALYDRAFT_485477 [Arabidopsis lyrata subsp. lyrata]		2	63	1.696	*	+	CL8236.Contig1	comp24481_c1_seq1	5.3766	0.000131038	+
	CL3684.Contig11	242 1714 VHS domain-containing protein [Arabidopsis lyrata subsp. lyrata] >gi|297339002|gb|EFH69419.1| VHS domain-containing protein [Arabidopsis lyrata subsp. lyrata]	CL3684.Contig7	11	187	1.027			CL3684.Contig11	comp21843_c0_seq1	-0.894251	0.442871
	Unigene29773	3 2780 low-level beta-amylase 1 [Arabidopsis lyrata subsp. lyrata] >gi|297310986|gb|EFH41410.1| low-level beta-amylase 1 [Arabidopsis lyrata subsp. lyrata]		2	55	1.148			Unigene29773	comp31960_c0_seq1	0.0500577	1
	Unigene29900	45 296 hypothetical protein ARALYDRAFT_481979 [Arabidopsis lyrata subsp. lyrata] >gi|297325111|gb|EFH55531.1| hypothetical protein ARALYDRAFT_481979 [Arabidopsis lyrata subsp. lyrata]		2	99	3.5			Unigene29900	comp26407_c0_seq1	1.25995	0.154589
	CL7485.Contig1	78 1487 minus strand hypothetical protein ARALYDRAFT_915517 [Arabidopsis lyrata subsp. lyrata] >gi|297314163|gb|EFH44586.1| hypothetical protein ARALYDRAFT_915517 [Arabidopsis lyrata subsp. lyrata]		20	528	0.967			CL7485.Contig1	comp23759_c0_seq1	-3.76713	7.42e-06	-
	CL9150.Contig1	2 280 hypothetical protein ARALYDRAFT_909184 [Arabidopsis lyrata subsp. lyrata] >gi|297317349|gb|EFH47771.1| hypothetical protein ARALYDRAFT_909184 [Arabidopsis lyrata subsp. lyrata]		2	143	0.971			CL9150.Contig1	comp10630_c1_seq1	0.469712	0.877066
	CL7135.Contig3	2 1156 hypothetical protein ARALYDRAFT_477124 [Arabidopsis lyrata subsp. lyrata] >gi|297335094|gb|EFH65512.1| hypothetical protein ARALYDRAFT_477124 [Arabidopsis lyrata subsp. lyrata]	CL7135.Contig4	4	2009	1.266			CL7135.Contig3	comp71882_c0_seq1	-0.967351	0.467855
	CL670.Contig1	56 1009 ribosome biogenesis regulatory protein family protein [Arabidopsis lyrata subsp. lyrata] >gi|297325560|gb|EFH55980.1| ribosome biogenesis regulatory protein family protein [Arabidopsis lyrata subsp. lyrata]		3	133	1.131			CL670.Contig1	comp29275_c0_seq1	0.594604	0.647347
	Unigene6456	2 634 Chain A, X-Ray Structure Of Gene Product From Arabidopsis Thaliana At5g02240 >gi|56554665|pdb|1XQ6|B Chain B, X-Ray Structure Of Gene Product From Arabidopsis Thaliana At5g02240 >gi|60594214|pdb|1YBM|A Chain A, X-Ray Structure Of Selenometh		15	552	1.144			Unigene6456	comp11209_c0_seq2	-0.515795	0.731107
	Unigene27618	74 1687 minus strand uncharacterized protein [Arabidopsis thaliana] >gi|222424530|dbj|BAH20220.1| AT5G14540 [Arabidopsis thaliana] >gi|332004662|gb|AED92045.1| uncharacterized protein [Arabidopsis thaliana]		9	231	0.995			Unigene27618	comp24925_c0_seq1	-1.77882	0.0390072
	Unigene7765	48 248 hypothetical protein ARALYDRAFT_326224 [Arabidopsis lyrata subsp. lyrata] >gi|297317638|gb|EFH48060.1| hypothetical protein ARALYDRAFT_326224 [Arabidopsis lyrata subsp. lyrata]		4	147	0.904			Unigene7765	comp17545_c0_seq1	33.4782	0.000466734	+
	Unigene23591	153 1271 nucleosome assembly protein I-like protein; similar to mouse nap I, PIR Accession Number JS0707, partial [Arabidopsis thaliana]		5	291	0.55	*	-	Unigene23591	comp82785_c0_seq1	-0.471394	1
	CL298.Contig1	147 4289 tetratricopeptide repeat-containing protein [Arabidopsis lyrata subsp. lyrata] >gi|297321965|gb|EFH52386.1| tetratricopeptide repeat-containing protein [Arabidopsis lyrata subsp. lyrata]		5	215	0.978			CL298.Contig1	comp21874_c2_seq1	-0.799643	0.544992
	Unigene26151	2 910 minus strand L-ascorbate oxidase homolog OS=Brassica napus GN=Bp10 PE=2 SV=1		2	72	0.304			Unigene26151	comp29589_c0_seq3	5.75747	4.95e-07	+
	CL1752.Contig2	5 625 uncharacterized protein [Arabidopsis thaliana] >gi|332643128|gb|AEE76649.1| uncharacterized protein [Arabidopsis thaliana]	CL1752.Contig3	5	100	1.35			CL1752.Contig2	comp26392_c0_seq2	0.0329794	1
	CL6565.Contig1	32 529 hypothetical protein ARALYDRAFT_912652 [Arabidopsis lyrata subsp. lyrata] >gi|297312811|gb|EFH43234.1| hypothetical protein ARALYDRAFT_912652 [Arabidopsis lyrata subsp. lyrata]	CL6565.Contig2	3	38	0.791			CL6565.Contig1	comp25246_c0_seq1	0.376603	0.935805
	Unigene19933	94 636 pseudouridine synthase and archaeosine transglycosylase domain-containing protein [Arabidopsis thaliana] >gi|332190281|gb|AEE28402.1| pseudouridine synthase and archaeosine transglycosylase domain-containing protein [Arabidopsis thaliana]		2	58	1.022			Unigene19933	comp31431_c1_seq1	0.131127	0.987975
	Unigene24468	150 449 minus strand hypothetical protein ARALYDRAFT_493480 [Arabidopsis lyrata subsp. lyrata] >gi|297316159|gb|EFH46582.1| hypothetical protein ARALYDRAFT_493480 [Arabidopsis lyrata subsp. lyrata]		10	272	1.026			Unigene24468	comp29709_c0_seq1	1.23563	0.168848
	Unigene1253	1522 1971 minus strand RNA-binding glycine-rich protein-1a [Nicotiana sylvestris] >gi|295393563|gb|ADG03637.1| RNA-binding glycine-rich protein [Nicotiana tabacum]	Unigene1254 Unigene1255 Unigene1256 Unigene1257 Unigene1258 Unigene1259 Unigene1260	3	261	0.915			Unigene1253	comp12306_c0_seq2	32.1432	0.0251893
	CL5570.Contig1	248 2167 hypothetical protein ARALYDRAFT_470937 [Arabidopsis lyrata subsp. lyrata] >gi|297335551|gb|EFH65968.1| hypothetical protein ARALYDRAFT_470937 [Arabidopsis lyrata subsp. lyrata]	CL5570.Contig2	3	147	1.029			CL5570.Contig1	comp27337_c0_seq1	0.224081	0.916934
	CL5743.Contig1	164 598 hypothetical protein ARALYDRAFT_904119 [Arabidopsis lyrata subsp. lyrata] >gi|297326088|gb|EFH56508.1| hypothetical protein ARALYDRAFT_904119 [Arabidopsis lyrata subsp. lyrata]		2	92	1.503	*	+	CL5743.Contig1	comp32195_c0_seq11	-0.655819	0.643945
	Unigene28850	138 1064 Pyridoxal biosynthesis protein PDX1.3 [Arabidopsis thaliana] >gi|45477193|sp|Q8L940.2|PDX13_ARATH RecName: Full=Pyridoxal biosynthesis protein PDX1.3; Short=AtPDX1.3; Short=AtPDX1;1 >gi|16226309|gb|AAL16130.1|AF428298_1 AT5g01410/T10O8_1		3	191	0.736			Unigene28850	comp31400_c1_seq3	-0.407042	0.746244
	Unigene8070	25 861 minus strand hypothetical protein ARALYDRAFT_912061 [Arabidopsis lyrata subsp. lyrata] >gi|297318715|gb|EFH49137.1| hypothetical protein ARALYDRAFT_912061 [Arabidopsis lyrata subsp. lyrata]		3	85	0.79			Unigene8070	comp27942_c0_seq1	0.0829243	1
	CL5232.Contig1	3 1106 predicted protein [Arabidopsis lyrata subsp. lyrata] >gi|297321398|gb|EFH51819.1| predicted protein [Arabidopsis lyrata subsp. lyrata]		3	116	0.392			CL5232.Contig1	comp23373_c0_seq1	-0.208898	0.956499
	Unigene8540	1 1224 minus strand ureidoglycolate amidohydrolase [Arabidopsis thaliana] >gi|110741173|dbj|BAF02137.1| N-carbamyl-L-amino acid amidohydrolase-like protein [Arabidopsis thaliana] >gi|332007603|gb|AED94986.1| ureidoglycolate amidohydrolase [Arabi		11	349	0.938			Unigene8540	comp11361_c0_seq1	-2.84017	0.000876433	-
	CL6985.Contig1	127 447 minus strand dormancy/auxin associated protein [Arabidopsis thaliana] >gi|13605730|gb|AAK32858.1|AF361846_1 At2g33830/T1B8.13 [Arabidopsis thaliana] >gi|11127601|dbj|BAB17679.1| Dormancy-associated protein homolog [Arabidopsis thaliana]		7	193	0.879			CL6985.Contig1	comp81088_c0_seq1	0.79164	0.889098
	Unigene25215	3 245 glycosyl hydrolase family 38 protein [Arabidopsis lyrata subsp. lyrata] >gi|297321173|gb|EFH51594.1| glycosyl hydrolase family 38 protein [Arabidopsis lyrata subsp. lyrata]		2	36	1.281			Unigene25215	comp31343_c1_seq3	0.4613	0.721175
	CL4118.Contig2	87 554 minus strand hypothetical protein ARALYDRAFT_889753 [Arabidopsis lyrata subsp. lyrata] >gi|297336357|gb|EFH66774.1| hypothetical protein ARALYDRAFT_889753 [Arabidopsis lyrata subsp. lyrata]	CL4118.Contig3	3	71	0.885			CL4118.Contig2	comp21703_c0_seq2	0.706155	0.607123
	CL14734.Contig1	228 860 minus strand hypothetical protein ARALYDRAFT_494299 [Arabidopsis lyrata subsp. lyrata] >gi|297309225|gb|EFH39649.1| hypothetical protein ARALYDRAFT_494299 [Arabidopsis lyrata subsp. lyrata]		6	74	0.646	*	-	CL14734.Contig1	comp23510_c0_seq2	3.14747	0.000646799	+
	CL1986.Contig5	104 358 hypothetical protein ARALYDRAFT_486241 [Arabidopsis lyrata subsp. lyrata] >gi|297322281|gb|EFH52702.1| hypothetical protein ARALYDRAFT_486241 [Arabidopsis lyrata subsp. lyrata]		2	43	0.964			CL1986.Contig5	comp31815_c0_seq2	-0.210059	0.926415
	CL261.Contig1	76 1149 diaminopimelate epimerase [Arabidopsis thaliana] >gi|75263858|sp|Q9LFG2.1|DAPF_ARATH RecName: Full=Diaminopimelate epimerase, chloroplastic; Short=DAP epimerase; Flags: Precursor >gi|6729509|emb|CAB67665.1| diaminopimelate epimerase-like		3	95	1.235			CL261.Contig1	comp26983_c0_seq2	35.4128	9.33e-08	+
	CL9266.Contig1	45 2201 minus strand hypothetical protein ARALYDRAFT_472406 [Arabidopsis lyrata subsp. lyrata] >gi|297336294|gb|EFH66711.1| hypothetical protein ARALYDRAFT_472406 [Arabidopsis lyrata subsp. lyrata]		11	346	0.677	*	-	CL9266.Contig1	comp12091_c1_seq1	1.79164	0.356935
	CL5075.Contig1	110 1693 minus strand succinate-semialdehyde dehydrogenase [Arabidopsis thaliana] >gi|118575126|sp|Q9SAK4.2|SSDH_ARATH RecName: Full=Succinate-semialdehyde dehydrogenase, mitochondrial; Short=At-SSADH1; AltName: Full=Aldehyde dehydrogenase famil		12	277	0.811	*	-	CL5075.Contig1	comp36312_c0_seq1	0.0279385	1
	Unigene21122	109 267 minus strand uncharacterized protein [Arabidopsis thaliana] >gi|106879137|gb|ABF82598.1| At3g01130 [Arabidopsis thaliana] >gi|332640092|gb|AEE73613.1| uncharacterized protein [Arabidopsis thaliana]		2	77	0.42	*	-	Unigene21122	comp34454_c0_seq1	-0.335739	0.834635
	CL2468.Contig1	1 480 ATRPA2/ROR1/RPA2 [Arabidopsis lyrata subsp. lyrata] >gi|297326427|gb|EFH56847.1| ATRPA2/ROR1/RPA2 [Arabidopsis lyrata subsp. lyrata]		4	134	0.481			CL2468.Contig1	comp23466_c0_seq1	2.63964	0.0299484
	Unigene26856	90 965 minus strand hypothetical protein ARALYDRAFT_893597 [Arabidopsis lyrata subsp. lyrata] >gi|297334030|gb|EFH64448.1| hypothetical protein ARALYDRAFT_893597 [Arabidopsis lyrata subsp. lyrata]		3	159	0.733			Unigene26856	comp14865_c0_seq1	-1.05692	0.480692
	Unigene21306	1 1752 minus strand hypothetical protein ARALYDRAFT_486740 [Arabidopsis lyrata subsp. lyrata] >gi|297324292|gb|EFH54713.1| hypothetical protein ARALYDRAFT_486740 [Arabidopsis lyrata subsp. lyrata]		11	202	1.061			Unigene21306	comp26941_c0_seq1	33.3518	0.000872686	+
	CL1515.Contig2	132 1298 minus strand pyruvate dehydrogenase E1 component subunit alpha-2 [Arabidopsis thaliana] >gi|118573089|sp|Q8H1Y0.2|ODPA2_ARATH RecName: Full=Pyruvate dehydrogenase E1 component subunit alpha-2, mitochondrial; Short=PDHE1-A; Flags: Precur		3	203	1.137			CL1515.Contig2	comp19942_c0_seq1	-0.646481	0.596218
	Unigene2770	157 1131 minus strand pfkB-type carbohydrate kinase family protein [Arabidopsis lyrata subsp. lyrata] >gi|297327011|gb|EFH57431.1| pfkB-type carbohydrate kinase family protein [Arabidopsis lyrata subsp. lyrata]	Unigene2772	9	830	1.347			Unigene2770	comp38166_c0_seq1	-0.611715	0.623656
	CL10025.Contig1	89 475 minus strand 40S ribosomal protein S26-2 [Arabidopsis thaliana] >gi|115502826|sp|Q8LPJ7.2|RS262_ARATH RecName: Full=40S ribosomal protein S26-2 >gi|2651314|gb|AAB87594.1| 40S ribosomal protein S26 [Arabidopsis thaliana] >gi|21555493|gb|AA	CL10025.Contig2 CL10025.Contig3 CL10025.Contig4	3	131	0.912			CL10025.Contig1	comp22491_c0_seq1	-33.2521	0.00135711
	CL1987.Contig1	140 3187 minus strand E1 subunit of 2-oxoglutarate dehydrogenase [Arabidopsis lyrata subsp. lyrata] >gi|297310813|gb|EFH41237.1| E1 subunit of 2-oxoglutarate dehydrogenase [Arabidopsis lyrata subsp. lyrata]	CL1987.Contig2	3	665	1.514			CL1987.Contig1	comp30148_c0_seq6	-1.3151	0.154041
	CL6689.Contig1	77 697 minus strand 40S ribosomal protein S5-1 [Arabidopsis thaliana] >gi|79324564|ref|NP_001031502.1| 40S ribosomal protein S5-1 [Arabidopsis thaliana] >gi|27734544|sp|Q9ZUT9.1|RS51_ARATH RecName: Full=40S ribosomal protein S5-1 >gi|4056502|gb|	CL6689.Contig2	3	108	1.169			CL6689.Contig1	comp31184_c0_seq4	0.731804	0.502554
	Unigene30658	80 751 minus strand hypothetical protein ARALYDRAFT_899731 [Arabidopsis lyrata subsp. lyrata] >gi|297329721|gb|EFH60140.1| hypothetical protein ARALYDRAFT_899731 [Arabidopsis lyrata subsp. lyrata]		7	273	0.685			Unigene30658	comp43642_c0_seq1	1.08932	0.315811
	CL6591.Contig1	196 372 minus strand ubiquinol-cytochrome c reductase subunit 9 [Arabidopsis thaliana] >gi|7669947|emb|CAB89234.1| ubiquinol--cytochrome-c reductase-like protein [Arabidopsis thaliana] >gi|332645466|gb|AEE78987.1| ubiquinol-cytochrome c reductas	CL6591.Contig2 CL6591.Contig3 CL6591.Contig4	2	73	1.088			CL6591.Contig1	comp23164_c0_seq2	-0.920406	0.355282
	Unigene23115	126 626 minus strand nascent polypeptide-associated complex subunit beta [Arabidopsis thaliana] >gi|297842067|ref|XP_002888915.1| nascent polypeptide-associated complex domain-containing protein [Arabidopsis lyrata subsp. lyrata] >gi|297334756|g		2	139	0.979			Unigene23115	comp11956_c0_seq1	-32.8597	0.00455443
	Unigene6874	41 514 pathogenesis-related protein 1 [Brassica rapa subsp. campestris]		9	272	1.39			Unigene6874	comp32354_c0_seq1	-9.81291	7.36e-16	-
	CL6289.Contig1	570 1703 hypothetical protein ARALYDRAFT_494129 [Arabidopsis lyrata subsp. lyrata] >gi|297316675|gb|EFH47098.1| hypothetical protein ARALYDRAFT_494129 [Arabidopsis lyrata subsp. lyrata]		2	347	1.342			CL6289.Contig1	comp26338_c0_seq4	-0.318195	0.858524
	Unigene6710	1 708 Amidase family protein [Arabidopsis thaliana] >gi|332003760|gb|AED91143.1| Amidase family protein [Arabidopsis thaliana]		3	102	1.34			Unigene6710	comp22183_c0_seq1	-1.90172	0.056346
	Unigene8697	2 649 minus strand ubiquitin family protein [Arabidopsis thaliana] >gi|16209707|gb|AAL14410.1| AT4g01000/F3I3_20 [Arabidopsis thaliana] >gi|53749168|gb|AAU90069.1| At4g01000 [Arabidopsis thaliana] >gi|332656565|gb|AEE81965.1| ubiquitin family pr		2	70	1.559			Unigene8697	comp19711_c0_seq1	-0.395691	0.759305
	CL648.Contig10	200 2413 minus strand Phosphoglucan, water dikinase, chloroplastic OS=Arabidopsis thaliana GN=GWD3 PE=1 SV=1	CL648.Contig11 CL648.Contig4 CL648.Contig5 CL648.Contig7 CL648.Contig8	4	144	2.061	*	+	CL648.Contig10	comp31029_c0_seq11	-32.5778	0.0102723
	CL6289.Contig2	1 390 hypothetical protein ARALYDRAFT_494129 [Arabidopsis lyrata subsp. lyrata] >gi|297316675|gb|EFH47098.1| hypothetical protein ARALYDRAFT_494129 [Arabidopsis lyrata subsp. lyrata]		3	253	0.783			CL6289.Contig2	comp26338_c0_seq2	-0.559153	0.627446
	CL10606.Contig1	68 841 caffeoyl-CoA 3-O-methyltransferase [Brassica rapa subsp. pekinensis]	CL10606.Contig2	5	183	0.824			CL10606.Contig1	comp6247_c0_seq1	1.599	0.461399
	CL10859.Contig5	3 1022 minus strand RNA recognition motif-containing protein [Arabidopsis lyrata subsp. lyrata] >gi|297315086|gb|EFH45509.1| RNA recognition motif-containing protein [Arabidopsis lyrata subsp. lyrata]		6	149	1.348			CL10859.Contig5	comp32111_c0_seq2	2.19829	0.154629
	CL239.Contig1	1 273 minus strand hypothetical protein ARALYDRAFT_471063 [Arabidopsis lyrata subsp. lyrata] >gi|297335604|gb|EFH66021.1| hypothetical protein ARALYDRAFT_471063 [Arabidopsis lyrata subsp. lyrata]		3	153	0.956			CL239.Contig1	comp30540_c0_seq1	-0.369503	0.791157
	CL275.Contig1	49 486 40S ribosomal protein S16 [Arabidopsis lyrata subsp. lyrata] >gi|297319727|gb|EFH50149.1| 40S ribosomal protein S16 [Arabidopsis lyrata subsp. lyrata]		2	121	1.855			CL275.Contig1	comp15210_c0_seq1	-33.0297	0.00275059
	CL8732.Contig1	82 1284 minus strand catalytic/ coenzyme binding protein [Arabidopsis lyrata subsp. lyrata] >gi|297330036|gb|EFH60455.1| catalytic/ coenzyme binding protein [Arabidopsis lyrata subsp. lyrata]	CL8732.Contig2	8	145	1.026			CL8732.Contig1	comp31373_c0_seq2	0.224099	0.924099
	CL4261.Contig1	74 1360 minus strand Peptidase M20/M25/M40 family protein [Arabidopsis thaliana] >gi|18650600|gb|AAL75900.1| AT4g38220/F20D10_340 [Arabidopsis thaliana] >gi|332661494|gb|AEE86894.1| Peptidase M20/M25/M40 family protein [Arabidopsis thaliana]		29	730	1.12			CL4261.Contig1	comp32570_c0_seq1	-0.549103	0.62194
	CL5196.Contig1	154 1206 minus strand hypothetical protein ARALYDRAFT_918614 [Arabidopsis lyrata subsp. lyrata] >gi|297310189|gb|EFH40613.1| hypothetical protein ARALYDRAFT_918614 [Arabidopsis lyrata subsp. lyrata]		27	1293	0.495	*	-	CL5196.Contig1	comp61918_c0_seq1	0.0140329	1
	Unigene21308	2 2995 minus strand AP-2 complex subunit alpha-2 [Arabidopsis thaliana] >gi|75157386|sp|Q8LPK4.1|AP2A2_ARATH RecName: Full=AP-2 complex subunit alpha-2; AltName: Full=Adapter-related protein complex 2 subunit alpha-2; AltName: Full=Adaptor prote		5	101	1.181			Unigene21308	comp26069_c0_seq1	-0.260075	0.875653
	CL3458.Contig2	251 649 minus strand vesicle associated protein [Arabidopsis thaliana] >gi|75161609|sp|Q8VZ95.1|VAP11_ARATH RecName: Full=Vesicle-associated protein 1-1; AltName: Full=Plant VAP homolog 11; Short=AtPVA11; AltName: Full=VAMP-associated protein 1-	CL3458.Contig3	2	111	1.58			CL3458.Contig2	comp31591_c0_seq8	33.7649	0.000181495	+
	CL12105.Contig1	95 1846 translation initiation factor eIF-3 subunit 7 [Arabidopsis thaliana] >gi|10176887|dbj|BAB10117.1| eukaryotic translation initiation factor 3 subunit 7 [Arabidopsis thaliana] >gi|332007713|gb|AED95096.1| translation initiation factor eIF-3		7	184	1.097			CL12105.Contig1	comp26287_c0_seq1	0.134528	0.969833
	CL9555.Contig2	167 769 minus strand DnaQ-like 3&apos;-5&apos; exonuclease domain-containing protein [Arabidopsis thaliana] >gi|27808516|gb|AAO24538.1| At3g11770 [Arabidopsis thaliana] >gi|332641574|gb|AEE75095.1| DnaQ-like 3&apos;-5&apos; exonuclease domain-co	CL9555.Contig4	2	62	0.716			CL9555.Contig2	comp24894_c0_seq1	0.339128	0.854109
	Unigene13244	1 420 AT4g33720 [Arabidopsis thaliana] >gi|3549674|emb|CAA20585.1| pathogenesis-related protein 1 precursor, 19.3K [Arabidopsis thaliana] >gi|7270321|emb|CAB80089.1| pathogenesis-related protein 1 precursor, 19.3K [Arabidopsis thaliana] >gi|14517		4	120	0.592			Unigene13244	comp11706_c0_seq1	-3.69665	5.69e-05	-
	CL3247.Contig1	70 966 minus strand uric acid degradation bifunctional protein TTL [Arabidopsis thaliana] >gi|332009637|gb|AED97020.1| uric acid degradation bifunctional protein TTL [Arabidopsis thaliana]	CL3247.Contig2	2	87	0.89			CL3247.Contig1	comp30925_c0_seq5	0.193997	0.940561
	CL5601.Contig3	213 554 minus strand vacuolar calcium binding protein [Raphanus sativus]		5	2111	1.203			CL5601.Contig3	comp20520_c0_seq2	1.76083	0.0347447
	Unigene22348	1 630 minus strand unnamed protein product [Thellungiella halophila]		5	248	1.186			Unigene22348	comp29136_c0_seq9	0.149377	0.968698
	CL4743.Contig1	613 825 minus strand hypothetical protein ARALYDRAFT_910122 [Arabidopsis lyrata subsp. lyrata] >gi|297319853|gb|EFH50275.1| hypothetical protein ARALYDRAFT_910122 [Arabidopsis lyrata subsp. lyrata]	CL4743.Contig2	4	198	1.755			CL4743.Contig1	comp30265_c0_seq2	1.43768	0.0928098
	CL6670.Contig1	280 552 uncharacterized protein [Arabidopsis thaliana] >gi|334183711|ref|NP_001077784.2| uncharacterized protein [Arabidopsis thaliana] >gi|9828619|gb|AAG00242.1|AC002130_7 F1N21.17 [Arabidopsis thaliana] >gi|28416595|gb|AAO42828.1| At1g67350 [Ar	CL6670.Contig2	2	83	1.659			CL6670.Contig1	comp23641_c0_seq3	-0.142744	0.976035
	CL11935.Contig1	94 987 minus strand regulatory particle non-ATPase 13 [Arabidopsis thaliana] >gi|79323128|ref|NP_001031424.1| regulatory particle non-ATPase 13 [Arabidopsis thaliana] >gi|79323137|ref|NP_001031425.1| regulatory particle non-ATPase 13 [Arabidopsi		8	211	0.692	*	-	CL11935.Contig1	comp15894_c0_seq1	0.319817	0.841461
	CL11597.Contig2	140 1006 minus strand 26S proteasome regulatory subunit [Arabidopsis lyrata subsp. lyrata] >gi|297827613|ref|XP_002881689.1| 26S proteasome regulatory subunit [Arabidopsis lyrata subsp. lyrata] >gi|297307815|gb|EFH38628.1| 26S proteasome regulat		14	477	0.769	*	-	CL11597.Contig2	comp27983_c0_seq1	1.15966	0.218977
	CL736.Contig1	1 1224 minus strand heat shock protein 81-4 [Brassica rapa]		2	540	1.719			CL736.Contig1	comp30366_c0_seq1	-1.36399	0.125874
	CL9175.Contig1	3 1973 calcium-binding EF hand-containing protein [Arabidopsis thaliana] >gi|8886934|gb|AAF80620.1|AC069251_13 F2D10.25 [Arabidopsis thaliana] >gi|332191898|gb|AEE30019.1| calcium-binding EF hand-containing protein [Arabidopsis thaliana]		10	232	0.948			CL9175.Contig1	comp29745_c0_seq4	-2.50209	0.0720457
	Unigene6024	2 1207 hydroxyproline-rich glycoprotein family protein [Arabidopsis thaliana] >gi|31711924|gb|AAP68318.1| At4g37130 [Arabidopsis thaliana] >gi|332661357|gb|AEE86757.1| hydroxyproline-rich glycoprotein family protein [Arabidopsis thaliana]		2	93	0.859			Unigene6024	comp49101_c0_seq1	-0.244885	0.916934
	CL5163.Contig1	2 577 minus strand SIT4 phosphatase-associated family protein [Arabidopsis lyrata subsp. lyrata] >gi|297336714|gb|EFH67131.1| SIT4 phosphatase-associated family protein [Arabidopsis lyrata subsp. lyrata]		2	97	1.133			CL5163.Contig1	comp47651_c0_seq1	0.322155	0.987975
	Unigene26935	119 748 minus strand uncharacterized protein [Arabidopsis thaliana] >gi|4835787|gb|AAD30253.1|AC007296_14 ESTs gb|R65381 and gb|T44635 come from this gene [Arabidopsis thaliana] >gi|27808534|gb|AAO24547.1| At1g11700 [Arabidopsis thaliana] >gi|33		2	57	0.988			Unigene26935	comp24072_c0_seq3	32.3124	0.0184434
	Unigene28750	75 3293 hypothetical protein ARALYDRAFT_473645 [Arabidopsis lyrata subsp. lyrata] >gi|297339692|gb|EFH70109.1| hypothetical protein ARALYDRAFT_473645 [Arabidopsis lyrata subsp. lyrata]		5	97	0.909			Unigene28750	comp28634_c0_seq1	0.0835965	1
	CL1362.Contig1	206 1279 minus strand hypothetical protein ARALYDRAFT_906673 [Arabidopsis lyrata subsp. lyrata] >gi|297323731|gb|EFH54152.1| hypothetical protein ARALYDRAFT_906673 [Arabidopsis lyrata subsp. lyrata]		44	1374	1.009			CL1362.Contig1	comp25628_c0_seq1	-4.03618	1.6e-05	-
	CL8098.Contig1	29 694 translational inhibitor protein like [Arabidopsis thaliana]		16	353	0.831	*	-	CL8098.Contig1	comp27680_c0_seq3	4.64962	0.00225537
	Unigene23946	156 1241 minus strand peptidoglycan-binding LysM domain-containing protein [Arabidopsis lyrata subsp. lyrata] >gi|297329880|gb|EFH60299.1| peptidoglycan-binding LysM domain-containing protein [Arabidopsis lyrata subsp. lyrata]		18	415	0.601	*	-	Unigene23946	comp23065_c0_seq3	-1.15665	0.203773
	CL263.Contig1	71 2344 transducin family protein [Arabidopsis lyrata subsp. lyrata] >gi|297328995|gb|EFH59414.1| transducin family protein [Arabidopsis lyrata subsp. lyrata]		3	92	0.938			CL263.Contig1	comp31135_c0_seq14	-32.0955	0.0347447
	CL1802.Contig1	68 1357 minus strand unnamed protein product [Thellungiella halophila]		141	4609	0.491			CL1802.Contig1	comp14722_c0_seq1	0.145857	1
	Unigene21694	3 911 minus strand unnamed protein product [Thellungiella halophila]		20	608	0.331	*	-	Unigene21694	comp41546_c0_seq1	0.376603	0.809972
	CL6746.Contig1	100 1374 minus strand hypothetical protein ARALYDRAFT_915009 [Arabidopsis lyrata subsp. lyrata] >gi|297313920|gb|EFH44343.1| hypothetical protein ARALYDRAFT_915009 [Arabidopsis lyrata subsp. lyrata]		10	259	1.375	*	+	CL6746.Contig1	comp27655_c0_seq1	1.31788	0.139691
	Unigene29675	182 2110 protein transmembrane nine 7 [Arabidopsis thaliana] >gi|9294023|dbj|BAB01926.1| multispanning membrane protein-like [Arabidopsis thaliana] >gi|332641889|gb|AEE75410.1| protein transmembrane nine 7 [Arabidopsis thaliana]		3	106	0.824			Unigene29675	comp27934_c0_seq1	-0.127006	0.968698
	CL1624.Contig1	2 427 minus strand polygalacturonase, putative [Arabidopsis thaliana]		2	227	0.757			CL1624.Contig1	comp24993_c0_seq2	34.0423	5.71e-05	+
	CL3106.Contig2	150 1136 CTP:phosphocholine cytidylyltransferase [Brassica napus]		4	64	1.008			CL3106.Contig2	comp30745_c1_seq5	0.491895	0.721386
	CL6045.Contig1	143 814 Putative Acttin-related protein 4 (ARP4) [Brassica oleracea]	CL6045.Contig2	2	49	0.782			CL6045.Contig1	comp26758_c0_seq2	0.920923	0.447692
	CL1031.Contig1	138 2618 hypothetical protein ARALYDRAFT_321144 [Arabidopsis lyrata subsp. lyrata] >gi|297327166|gb|EFH57586.1| hypothetical protein ARALYDRAFT_321144 [Arabidopsis lyrata subsp. lyrata]	CL1031.Contig2	6	196	1.027			CL1031.Contig1	comp17858_c0_seq1	-31.4447	0.139691
	Unigene36	41 427 PREDICTED: LOW QUALITY PROTEIN: ubiquitin-60S ribosomal protein L40 [Vitis vinifera]	Unigene564 CL894.Contig5 Unigene967 Unigene2479 Unigene26887 CL894.Contig8	17	426	1.218			Unigene36	comp14138_c0_seq1	0.0691744	1
	Unigene623	130 852 unnamed protein product [Thellungiella halophila]		7	443	1.883	*	+	Unigene623	comp29160_c0_seq1	2.50116	0.0167412
	CL9573.Contig7	2 586 minus strand hypothetical protein ARALYDRAFT_476670 [Arabidopsis lyrata subsp. lyrata] >gi|297334859|gb|EFH65277.1| hypothetical protein ARALYDRAFT_476670 [Arabidopsis lyrata subsp. lyrata]		2	105	3.207			CL9573.Contig7	comp27901_c1_seq1	5.95662	6.46e-06	+
	Unigene19522	134 586 minus strand unknown [Arabidopsis thaliana]		2	86	0.962			Unigene19522	comp16557_c0_seq1	-0.825031	0.463617
	CL3671.Contig2	188 622 minus strand hypothetical protein ARALYDRAFT_899257 [Arabidopsis lyrata subsp. lyrata] >gi|297331599|gb|EFH62018.1| hypothetical protein ARALYDRAFT_899257 [Arabidopsis lyrata subsp. lyrata]	CL3671.Contig3	3	116	1.322			CL3671.Contig2	comp18829_c0_seq1	-1.25143	0.152821
	Unigene26947	282 491 PAB8 binding protein 8 [Arabidopsis lyrata subsp. lyrata] >gi|297337373|gb|EFH67790.1| PAB8 binding protein 8 [Arabidopsis lyrata subsp. lyrata]		4	229	0.964			Unigene26947	comp28074_c1_seq4	0.183958	0.964129
	Unigene22950	288 1421 minus strand ferredoxin--NADP+ reductase [Arabidopsis thaliana] >gi|182705189|sp|Q9M0V6.2|FNRR1_ARATH RecName: Full=Ferredoxin--NADP reductase, root isozyme 1, chloroplastic; AltName: Full=Root FNR 1; Short=AtRFNR1; Flags: Precursor >gi		8	308	1.191	*		Unigene22950	comp24252_c0_seq2	31.6514	0.0686039
	CL12773.Contig3	44 658 minus strand Nascent polypeptide-associated complex subunit alpha-like protein 1 [Arabidopsis thaliana] >gi|71151984|sp|Q9LHG9.1|NACA1_ARATH RecName: Full=Nascent polypeptide-associated complex subunit alpha-like protein 1; Short=NAC-alph		10	994	0.68	*	-	CL12773.Contig3	comp24990_c0_seq1	2.65156	0.00976145
	Unigene13845	54 842 minus strand Mitochondrial glycoprotein family protein [Arabidopsis thaliana] >gi|32815955|gb|AAP88362.1| At5g02050 [Arabidopsis thaliana] >gi|332003043|gb|AED90426.1| Mitochondrial glycoprotein family protein [Arabidopsis thaliana]		10	232	1.04			Unigene13845	comp52800_c0_seq1	32.9733	0.00275059
	CL1624.Contig3	89 529 minus strand glycoside hydrolase family 28 protein / polygalacturonase (pectinase) family protein [Arabidopsis thaliana] >gi|332642352|gb|AEE75873.1| glycoside hydrolase family 28 protein / polygalacturonase (pectinase) family protein [Ar		3	147	0.815			CL1624.Contig3	comp26828_c0_seq1	1.89814	0.13908
	CL12699.Contig1	66 776 minus strand hypothetical protein ARALYDRAFT_478846 [Arabidopsis lyrata subsp. lyrata] >gi|297328715|gb|EFH59134.1| hypothetical protein ARALYDRAFT_478846 [Arabidopsis lyrata subsp. lyrata]		11	437	0.725			CL12699.Contig1	comp64789_c0_seq1	-0.586871	0.774189
	Unigene27154	1 513 minus strand hypothetical protein ARALYDRAFT_496774 [Arabidopsis lyrata subsp. lyrata] >gi|297312506|gb|EFH42930.1| hypothetical protein ARALYDRAFT_496774 [Arabidopsis lyrata subsp. lyrata]	Unigene27155	4	394	1.437			Unigene27154	comp30542_c3_seq3	-0.711297	0.513918
	CL3500.Contig2	3 728 predicted protein [Arabidopsis lyrata subsp. lyrata] >gi|297325866|gb|EFH56286.1| predicted protein [Arabidopsis lyrata subsp. lyrata]		3	81	0.729			CL3500.Contig2	comp25173_c0_seq1	-33.5485	0.000466734	-
	Unigene18944	192 878 hypothetical protein ARALYDRAFT_471375 [Arabidopsis lyrata subsp. lyrata] >gi|297335767|gb|EFH66184.1| hypothetical protein ARALYDRAFT_471375 [Arabidopsis lyrata subsp. lyrata]		2	138	0.892			Unigene18944	comp25462_c0_seq1	3.29414	0.00683026
	CL736.Contig5	116 1012 minus strand unnamed protein product [Thellungiella halophila]		6	210	2.809	*	+	CL736.Contig5	comp61136_c0_seq1	-0.449368	0.863482
	CL494.Contig1	467 2230 protein IQ-DOMAIN 14 [Arabidopsis thaliana] >gi|238479554|ref|NP_001154574.1| protein IQ-DOMAIN 14 [Arabidopsis thaliana] >gi|75271948|sp|Q8LPG9.1|IQD14_ARATH RecName: Full=Protein IQ-DOMAIN 14 >gi|30725490|gb|AAP37767.1| At2g43680 [Arab	CL494.Contig3 CL494.Contig5 Unigene529	2	38	0.586	*	-	CL494.Contig1	comp19478_c0_seq4	-2.17676	0.0123692
	Unigene8490	143 1972 minus strand hypothetical protein ARALYDRAFT_473472 [Arabidopsis lyrata subsp. lyrata] >gi|297339588|gb|EFH70005.1| hypothetical protein ARALYDRAFT_473472 [Arabidopsis lyrata subsp. lyrata]		42	1346	1.582	*	+	Unigene8490	comp22757_c0_seq5	0.318246	0.958382
	CL7657.Contig1	112 858 117M18_18 [Brassica rapa]	CL7657.Contig2	8	276	2.855	*	+	CL7657.Contig1	comp31649_c1_seq2	0.476837	0.687097
	CL6039.Contig1	158 1576 minus strand citrate synthase 4 [Arabidopsis thaliana] >gi|14423562|gb|AAK62463.1|AF387018_1 citrate synthase [Arabidopsis thaliana] >gi|20197191|gb|AAC16084.2| citrate synthase [Arabidopsis thaliana] >gi|30387583|gb|AAP31957.1| At2g443		6	208	1.136	*		CL6039.Contig1	comp20615_c0_seq2	-1.66641	0.0559131
	CL459.Contig2	128 733 minus strand RAB GTPase-1A [Arabidopsis thaliana] >gi|75172011|sp|Q9FPJ4.1|RAD2B_ARATH RecName: Full=Ras-related protein RABD2b; Short=AtRABD2b; AltName: Full=Ras-related protein Rab1A; Short=AtRab1A >gi|11762128|gb|AAG40342.1|AF324990_1		2	189	1.278			CL459.Contig2	comp148257_c0_seq1	-2.20836	0.643979
	CL8300.Contig1	3 299 hypothetical protein ARALYDRAFT_479492 [Arabidopsis lyrata subsp. lyrata] >gi|297329041|gb|EFH59460.1| hypothetical protein ARALYDRAFT_479492 [Arabidopsis lyrata subsp. lyrata]		3	61	1.007			CL8300.Contig1	comp30505_c0_seq2	1.26964	0.204055
	Unigene27240	226 3948 minus strand unnamed protein product [Thellungiella halophila]		5	70	1.746	*	+	Unigene27240	comp32224_c0_seq3	-2.14358	0.0489753
	Unigene10298	4 222 non-specific lipid-transfer protein 8 [Arabidopsis thaliana] >gi|75216116|sp|Q9ZPW9.1|NLTP8_ARATH RecName: Full=Non-specific lipid-transfer protein 8; Short=LTP 8; Flags: Precursor >gi|330251668|gb|AEC06762.1| non-specific lipid-transfer pr		3	56	1.402			Unigene10298	comp22076_c0_seq2	-6.51877	0.0489753
	CL452.Contig4	3 200 minus strand beta-xylosidase 4 [Arabidopsis lyrata subsp. lyrata] >gi|297312458|gb|EFH42882.1| beta-xylosidase 4 [Arabidopsis lyrata subsp. lyrata]		3	129	0.451	*	-	CL452.Contig4	comp30454_c0_seq1	-33.9816	7.8e-05	-
	CL11059.Contig1	25 1146 strictosidine synthase family protein [Arabidopsis thaliana] >gi|332646077|gb|AEE79598.1| strictosidine synthase family protein [Arabidopsis thaliana]		23	935	2.042	*	+	CL11059.Contig1	comp11225_c0_seq1	2.20668	0.131043
	CL1528.Contig1	3 1070 minus strand hypothetical protein ARALYDRAFT_912062 [Arabidopsis lyrata subsp. lyrata] >gi|297320801|gb|EFH51223.1| hypothetical protein ARALYDRAFT_912062 [Arabidopsis lyrata subsp. lyrata]		2	48	0.579			CL1528.Contig1	comp31283_c0_seq1	-1.39133	0.130599
	CL1222.Contig1	261 3470 unnamed protein product [Thellungiella halophila]		3	79	1.527			CL1222.Contig1	comp6672_c0_seq1	-32.5602	0.0102723
	Unigene2117	80 253 homolog of anti-oxidant 1 [Arabidopsis thaliana] >gi|14532548|gb|AAK64002.1| At1g66240/T6J19_6 [Arabidopsis thaliana] >gi|18655401|gb|AAL76156.1| At1g66240/T6J19_6 [Arabidopsis thaliana] >gi|332196360|gb|AEE34481.1| homolog of anti-oxidant		3	114	0.906			Unigene2117	comp9552_c0_seq1	-0.20836	0.951717
	CL9655.Contig3	1 321 minus strand cyclase family protein [Arabidopsis lyrata subsp. lyrata] >gi|297312967|gb|EFH43390.1| cyclase family protein [Arabidopsis lyrata subsp. lyrata]		8	163	0.591	*	-	CL9655.Contig3	comp15079_c0_seq1	-2.65384	0.00164336
	CL4517.Contig1	166 1590 AAT/ATAAT/MEE17 [Arabidopsis lyrata subsp. lyrata] >gi|297326277|gb|EFH56697.1| AAT/ATAAT/MEE17 [Arabidopsis lyrata subsp. lyrata]		2	105	1.177			CL4517.Contig1	comp31342_c0_seq1	35.1735	2.9e-07	+
	Unigene28082	103 438 minus strand hypothetical protein ARALYDRAFT_480954 [Arabidopsis lyrata subsp. lyrata] >gi|297326193|gb|EFH56613.1| hypothetical protein ARALYDRAFT_480954 [Arabidopsis lyrata subsp. lyrata]		3	114	1.578			Unigene28082	comp24620_c0_seq1	1.06173	0.355356
	CL1707.Contig2	563 877 minus strand hypothetical protein ARALYDRAFT_470488 [Arabidopsis lyrata subsp. lyrata] >gi|297338098|gb|EFH68515.1| hypothetical protein ARALYDRAFT_470488 [Arabidopsis lyrata subsp. lyrata]	CL1707.Contig3	3	58	1.304	*	+	CL1707.Contig2	comp25356_c0_seq5	-3.33629	0.000126674	-
	CL7345.Contig1	110 757 aspartyl protease-like protein [Arabidopsis thaliana] >gi|332640332|gb|AEE73853.1| aspartyl protease-like protein [Arabidopsis thaliana]		4	124	0.899			CL7345.Contig1	comp31499_c0_seq2	-0.428185	0.746244
	CL8491.Contig3	2 265 minus strand F10B6.22 [Arabidopsis lyrata subsp. lyrata] >gi|297338673|gb|EFH69090.1| F10B6.22 [Arabidopsis lyrata subsp. lyrata]		2	74	1.424			CL8491.Contig3	comp30246_c0_seq3	3.25107	0.109003
	CL5201.Contig2	1 759 minus strand catalytic/ coenzyme binding protein [Arabidopsis lyrata subsp. lyrata] >gi|297319309|gb|EFH49731.1| catalytic/ coenzyme binding protein [Arabidopsis lyrata subsp. lyrata]	CL5201.Contig3 CL5201.Contig4	6	208	0.561	*	-	CL5201.Contig2	comp30435_c0_seq3	3.0698	0.194336
	CL4428.Contig2	64 1743 minus strand Ara4-interacting protein [Arabidopsis thaliana] >gi|332657643|gb|AEE83043.1| Ara4-interacting protein [Arabidopsis thaliana]	CL4428.Contig3	15	507	0.66	*	-	CL4428.Contig2	comp22393_c0_seq1	-1.10375	0.220285
	CL10468.Contig1	93 1913 minus strand transducin family protein [Arabidopsis lyrata subsp. lyrata] >gi|297328945|gb|EFH59364.1| transducin family protein [Arabidopsis lyrata subsp. lyrata]	CL10468.Contig2	7	275	0.907			CL10468.Contig1	comp26175_c0_seq2	35.3858	1.07e-07	+
	CL7591.Contig3	153 449 minus strand hypothetical protein ARALYDRAFT_484402 [Arabidopsis lyrata subsp. lyrata] >gi|297321155|gb|EFH51576.1| hypothetical protein ARALYDRAFT_484402 [Arabidopsis lyrata subsp. lyrata]		4	212	1.144			CL7591.Contig3	comp26309_c0_seq1	0.162735	0.962111
	Unigene18461	173 859 predicted protein [Arabidopsis lyrata subsp. lyrata] >gi|297339593|gb|EFH70010.1| predicted protein [Arabidopsis lyrata subsp. lyrata]		3	54	1.39			Unigene18461	comp26329_c0_seq1	-32.8037	0.00591794
	Unigene27985	1 330 GTP binding protein [Arabidopsis lyrata subsp. lyrata] >gi|297339476|gb|EFH69893.1| GTP binding protein [Arabidopsis lyrata subsp. lyrata]		3	214	0.812			Unigene27985	comp30984_c0_seq1	0.0101754	1
	Unigene6209	46 378 uncharacterized protein [Arabidopsis thaliana] >gi|34365673|gb|AAQ65148.1| At5g12240 [Arabidopsis thaliana] >gi|332004399|gb|AED91782.1| uncharacterized protein [Arabidopsis thaliana]		2	122	1.076			Unigene6209	comp21375_c0_seq1	0.0140329	1
	CL14500.Contig1	117 1109 minus strand peroxidase [Eutrema halophilum]		10	301	0.763	*	-	CL14500.Contig1	comp32272_c0_seq1	5.94131	5.99e-11	+
	CL14722.Contig1	208 852 minus strand vacuolar protein sorting-associated protein 32-2 [Arabidopsis thaliana] >gi|145334175|ref|NP_001078468.1| vacuolar protein sorting-associated protein 32-2 [Arabidopsis thaliana] >gi|75213588|sp|Q9SZE4.1|VP322_ARATH RecName:		4	89	1.148			CL14722.Contig1	comp21731_c0_seq3	-1.29062	0.412087
	CL731.Contig3	64 1524 minus strand aspartyl protease family protein [Arabidopsis lyrata subsp. lyrata] >gi|297335107|gb|EFH65525.1| aspartyl protease family protein [Arabidopsis lyrata subsp. lyrata]		10	379	0.494	*	-	CL731.Contig3	comp23329_c0_seq1	2.99842	0.000487028	+
	CL251.Contig2	2 496 hypothetical protein ARALYDRAFT_328078 [Arabidopsis lyrata subsp. lyrata] >gi|297312819|gb|EFH43242.1| hypothetical protein ARALYDRAFT_328078 [Arabidopsis lyrata subsp. lyrata]		3	120	1.7			CL251.Contig2	comp429_c0_seq1	-0.20836	1
	CL6629.Contig1	2 661 splicing factor u2af large subunit, putative [Ricinus communis] >gi|223535572|gb|EEF37240.1| splicing factor u2af large subunit, putative [Ricinus communis]	CL6629.Contig2	4	111	0.807			CL6629.Contig1	comp30705_c0_seq5	1.74517	0.1842
	Unigene2151	2 289 minus strand beta-Ig-H3 domain-containing protein [Arabidopsis lyrata subsp. lyrata] >gi|297317054|gb|EFH47476.1| beta-Ig-H3 domain-containing protein [Arabidopsis lyrata subsp. lyrata]		2	93	2.093			Unigene2151	comp31017_c1_seq5	35.0706	4.9e-07	+
	CL8722.Contig1	84 1244 hypothetical protein ARALYDRAFT_896249 [Arabidopsis lyrata subsp. lyrata] >gi|297328089|gb|EFH58508.1| hypothetical protein ARALYDRAFT_896249 [Arabidopsis lyrata subsp. lyrata]		8	339	0.937			CL8722.Contig1	comp16668_c0_seq1	-32.3192	0.0184434
	CL7875.Contig1	134 2662 minus strand unnamed protein product [Thellungiella halophila]	CL7875.Contig2	92	2686	1.491	*	+	CL7875.Contig1	comp32241_c1_seq2	-0.539972	0.638836
	CL1405.Contig1	63 1871 minus strand hypothetical protein ARALYDRAFT_491252 [Arabidopsis lyrata subsp. lyrata] >gi|297312965|gb|EFH43388.1| hypothetical protein ARALYDRAFT_491252 [Arabidopsis lyrata subsp. lyrata]		23	976	1.427	*	+	CL1405.Contig1	comp34442_c0_seq1	-33.3179	0.00108402
	CL2274.Contig1	1 2619 minus strand hypothetical protein ARALYDRAFT_916271 [Arabidopsis lyrata subsp. lyrata] >gi|297314517|gb|EFH44940.1| hypothetical protein ARALYDRAFT_916271 [Arabidopsis lyrata subsp. lyrata]		5	107	2.158			CL2274.Contig1	comp31727_c0_seq3	-2.79332	0.353433
	CL7567.Contig2	157 1671 minus strand dihydrolipoyl dehydrogenase 2 [Arabidopsis thaliana] >gi|30684428|ref|NP_566570.3| dihydrolipoyl dehydrogenase 2 [Arabidopsis thaliana] >gi|75264758|sp|Q9M5K2.1|DLDH2_ARATH RecName: Full=Dihydrolipoyl dehydrogenase 2, mitoc		11	982	1.526	*	+	CL7567.Contig2	comp31223_c0_seq2	-2.53805	0.00244945
	CL2292.Contig1	1 1077 cyclase associated protein 1 [Arabidopsis thaliana] >gi|3169136|dbj|BAA28621.1| Atcap1 [Arabidopsis thaliana] >gi|115646727|gb|ABJ17096.1| At4g34490 [Arabidopsis thaliana] >gi|332660985|gb|AEE86385.1| cyclase associated protein 1 [Arabidop		5	116	1.785			CL2292.Contig1	comp29194_c0_seq1	1.56925	0.0751183
	CL9911.Contig3	1 600 hypothetical protein ARALYDRAFT_895079 [Arabidopsis lyrata subsp. lyrata] >gi|297333267|gb|EFH63685.1| hypothetical protein ARALYDRAFT_895079 [Arabidopsis lyrata subsp. lyrata]		7	177	5.521	*	+	CL9911.Contig3	comp37862_c0_seq1	34.4843	8.07e-06	+
	Unigene2709	248 586 minus strand hypothetical protein ARALYDRAFT_492082 [Arabidopsis lyrata subsp. lyrata] >gi|297313356|gb|EFH43779.1| hypothetical protein ARALYDRAFT_492082 [Arabidopsis lyrata subsp. lyrata]	CL7407.Contig1 CL7407.Contig2 CL9023.Contig1 CL9023.Contig2	2	85	1.417			Unigene2709	comp27164_c0_seq1	1.00316	0.294209
	Unigene26689	203 1216 tyrosine phosphatase 1 [Arabidopsis thaliana] >gi|79321133|ref|NP_001031266.1| tyrosine phosphatase 1 [Arabidopsis thaliana] >gi|75279131|sp|O82656.1|PTP1_ARATH RecName: Full=Protein-tyrosine-phosphatase PTP1; AltName: Full=Protein tyros		6	167	0.948			Unigene26689	comp29485_c0_seq1	-0.0168281	1
	Unigene6615	2 154 minus strand nuclear RNA binding protein, putative [Brassica oleracea]		3	82	0.734			Unigene6615	comp28651_c0_seq1	-5.66107	5.93e-07	-
	CL965.Contig8	244 1422 minus strand RecName: Full=S-adenosylmethionine synthase; Short=AdoMet synthase; AltName: Full=Methionine adenosyltransferase; Short=MAT >gi|75306462|sp|Q94FA4.1|METK5_BRAJU RecName: Full=S-adenosylmethionine synthase 5; Short=AdoMet sy	CL965.Contig9 Unigene28451	10	1060	0.725			CL965.Contig8	comp29708_c1_seq1	0.5752	0.596769
	Unigene20739	198 770 transcription factor lim1 [Arabidopsis thaliana] >gi|13926190|gb|AAK49575.1|AF370569_1 similar to transcription factor SF3 (pir|IS37656) [Arabidopsis thaliana] >gi|332190431|gb|AEE28552.1| transcription factor lim1 [Arabidopsis thaliana]		2	61	0.985			Unigene20739	comp24711_c0_seq1	3.47496	0.000939799	+
	CL11503.Contig1	14 2068 DCD (Development and Cell Death) domain protein [Arabidopsis thaliana] >gi|330253667|gb|AEC08761.1| DCD (Development and Cell Death) domain protein [Arabidopsis thaliana]		5	100	1.492			CL11503.Contig1	comp21022_c0_seq1	0.803154	0.417983
	CL1435.Contig2	217 1701 minus strand signal recognition particle subunit SRP54 [Arabidopsis thaliana] >gi|21542461|sp|P49967.2|SR543_ARATH RecName: Full=Signal recognition particle 54 kDa protein 3; Short=SRP54 >gi|17386102|gb|AAL38597.1|AF446864_1 At1g48900/F		2	43	0.842			CL1435.Contig2	comp29465_c0_seq1	-0.306484	0.834635
	Unigene28896	263 1273 minus strand tudor domain-containing protein [Arabidopsis lyrata subsp. lyrata] >gi|297319142|gb|EFH49564.1| tudor domain-containing protein [Arabidopsis lyrata subsp. lyrata]		3	262	1.027			Unigene28896	comp20993_c0_seq1	0.265572	0.935805
	Unigene1829	119 718 hypothetical protein AP6_E08.1 [Arabidopsis lyrata subsp. petraea]		3	102	0.469			Unigene1829	comp15204_c0_seq1	-0.530288	0.805793
	Unigene22859	111 1484 minus strand pyruvate dehydrogenase E2 component [Arabidopsis thaliana] >gi|22135832|gb|AAM91102.1| At1g34430/F7P12_2 [Arabidopsis thaliana] >gi|24111345|gb|AAN46796.1| At1g34430/F7P12_2 [Arabidopsis thaliana] >gi|332193592|gb|AEE31713.		6	282	0.699			Unigene22859	comp24852_c0_seq1	0.507073	0.679492
	CL726.Contig1	135 905 binding partner of acd11 1 [Arabidopsis thaliana] >gi|332004965|gb|AED92348.1| binding partner of acd11 1 [Arabidopsis thaliana]		13	478	1.11			CL726.Contig1	comp12531_c0_seq2	31.3518	0.139691
	CL2854.Contig14	68 2083 minus strand peptidase M28 family protein [Arabidopsis lyrata subsp. lyrata] >gi|297317741|gb|EFH48163.1| peptidase M28 family protein [Arabidopsis lyrata subsp. lyrata]	CL2854.Contig15	6	198	1.027			CL2854.Contig14	comp30887_c0_seq2	32.5399	0.0102723
	CL2849.Contig1	173 1630 NADH dehydrogenase (ubiquinone) flavoprotein 1 [Arabidopsis thaliana] >gi|75171894|sp|Q9FNN5.1|NDUV1_ARATH RecName: Full=NADH dehydrogenase [ubiquinone] flavoprotein 1, mitochondrial; Flags: Precursor >gi|9759347|dbj|BAB10002.1| NADH deh		3	134	1.881			CL2849.Contig1	comp113357_c0_seq1	0.376603	1
	Unigene14612	2 394 minus strand hypothetical protein ARALYDRAFT_908201 [Arabidopsis lyrata subsp. lyrata] >gi|297318924|gb|EFH49346.1| hypothetical protein ARALYDRAFT_908201 [Arabidopsis lyrata subsp. lyrata]		5	302	1.103			Unigene14612	comp26018_c0_seq2	-0.284234	1
	Unigene20328	59 1711 rotamase FKBP 1 [Arabidopsis thaliana] >gi|73919362|sp|Q38931.2|FKB62_ARATH RecName: Full=Peptidyl-prolyl cis-trans isomerase FKBP62; Short=PPIase FKBP62; AltName: Full=70 kDa peptidyl-prolyl isomerase; AltName: Full=FK506-binding protein		8	163	1.711	*	+	Unigene20328	comp31441_c2_seq2	-0.620084	0.582826
	CL9655.Contig1	199 1554 V-type proton ATPase subunit H [Arabidopsis thaliana] >gi|12585473|sp|Q9LX65.1|VATH_ARATH RecName: Full=V-type proton ATPase subunit H; Short=V-ATPase subunit H; AltName: Full=Vacuolar H(+)-ATPase subunit H; AltName: Full=Vacuolar proton	CL9655.Contig2	3	48	1.053			CL9655.Contig1	comp30609_c0_seq2	-0.4102	0.746387
	CL3664.Contig11	20 637 unnamed protein product [Thellungiella halophila]		4	115	0.816			CL3664.Contig11	comp25342_c1_seq1	5.3308	6.46e-06	+
	CL8679.Contig1	33 1085 pyrophosphate-dependent phosphofructokinase alpha subunit [Arabidopsis thaliana] >gi|16648971|gb|AAL24337.1| pyrophosphate-dependent phosphofructokinase alpha subunit [Arabidopsis thaliana] >gi|30725422|gb|AAP37733.1| At1g20950 [Arabidops		5	245	0.888			CL8679.Contig1	comp30074_c0_seq11	2.35641	0.0189174
	Unigene6953	1 1212 hypothetical protein ARALYDRAFT_339650 [Arabidopsis lyrata subsp. lyrata] >gi|297333389|gb|EFH63807.1| hypothetical protein ARALYDRAFT_339650 [Arabidopsis lyrata subsp. lyrata]		3	66	0.884			Unigene6953	comp12561_c0_seq2	-1.8335	0.0329312
	Unigene703	76 444 minus strand 60S ribosomal protein L35-1 [Arabidopsis thaliana] >gi|46397054|sp|Q9SF53.1|RL351_ARATH RecName: Full=60S ribosomal protein L35-1 >gi|332641253|gb|AEE74774.1| 60S ribosomal protein L35-1 [Arabidopsis thaliana]	CL7631.Contig2 CL7631.Contig3	3	96	1.449	*	+	Unigene703	comp27862_c0_seq1	0.848593	0.387544
	CL4881.Contig1	2 880 minus strand unknown [Arabidopsis thaliana]		7	111	1.21			CL4881.Contig1	comp31006_c0_seq1	32.7954	0.00455443
	CL1202.Contig6	303 839 minus strand 4-methyl-5(b-hydroxyethyl)-thiazole monophosphate biosynthesis [Arabidopsis thaliana] >gi|7769869|gb|AAF69547.1|AC008007_22 F12M16.18 [Arabidopsis thaliana] >gi|332194795|gb|AEE32916.1| 4-methyl-5(b-hydroxyethyl)-thiazole mo	CL1202.Contig7	2	108	1.697	*	+	CL1202.Contig6	comp29714_c0_seq10	-32.0939	0.0347447
	Unigene14945	145 672 hypothetical protein ARALYDRAFT_471529 [Arabidopsis lyrata subsp. lyrata] >gi|297335859|gb|EFH66276.1| hypothetical protein ARALYDRAFT_471529 [Arabidopsis lyrata subsp. lyrata]		3	77	0.729			Unigene14945	comp37201_c0_seq1	0.277067	0.893311
	CL3875.Contig1	28 2271 minus strand hypothetical protein ARALYDRAFT_488925 [Arabidopsis lyrata subsp. lyrata] >gi|297317765|gb|EFH48187.1| hypothetical protein ARALYDRAFT_488925 [Arabidopsis lyrata subsp. lyrata]	CL3875.Contig2	8	274	0.96			CL3875.Contig1	comp26653_c0_seq2	-0.513151	0.6769
	CL10866.Contig2	48 932 minus strand hypothetical protein ARALYDRAFT_473038 [Arabidopsis lyrata subsp. lyrata] >gi|297339360|gb|EFH69777.1| hypothetical protein ARALYDRAFT_473038 [Arabidopsis lyrata subsp. lyrata]		10	258	0.597	*	-	CL10866.Contig2	comp25471_c0_seq4	2.92554	0.000464717	+
	CL4361.Contig3	90 1391 minus strand 117M18_4 [Brassica rapa]		3	54	1.633	*	+	CL4361.Contig3	comp25051_c0_seq1	0.306214	0.878157
	CL12262.Contig1	1 2928 minus strand hypothetical protein ARALYDRAFT_481921 [Arabidopsis lyrata subsp. lyrata] >gi|297326924|gb|EFH57344.1| hypothetical protein ARALYDRAFT_481921 [Arabidopsis lyrata subsp. lyrata]		10	474	1.308	*	+	CL12262.Contig1	comp32212_c0_seq3	-0.651311	0.549502
	Unigene1015	122 664 minus strand ADP-ribosylation factor [Arabidopsis lyrata subsp. lyrata] >gi|297338427|gb|EFH68844.1| ADP-ribosylation factor [Arabidopsis lyrata subsp. lyrata]	Unigene1016 Unigene1021 Unigene1022 Unigene2214 Unigene2215 Unigene25424 Unigene25425 Unigene25426 Unigene25427 Unigene25428 Unigene25429	13	312	2.705	*	+	Unigene1015	comp18368_c0_seq1	0.206678	1
	CL3177.Contig3	118 1053 minus strand aldose 1-epimerase family protein [Arabidopsis lyrata subsp. lyrata] >gi|297315481|gb|EFH45904.1| aldose 1-epimerase family protein [Arabidopsis lyrata subsp. lyrata]		15	429	0.485	*	-	CL3177.Contig3	comp30624_c0_seq7	31.7741	0.0686039
	CL1027.Contig1	1 624 peroxidase 32 [Eutrema halophilum]		20	741	0.879			CL1027.Contig1	comp18851_c1_seq1	-1.52805	0.0804587
	CL11190.Contig1	105 1937 minus strand leukotriene-A4 hydrolase [Arabidopsis thaliana] >gi|9955544|emb|CAC05429.1| leukotriene-A4 hydrolase-like protein [Arabidopsis thaliana] >gi|332004524|gb|AED91907.1| leukotriene-A4 hydrolase [Arabidopsis thaliana]	CL11190.Contig2	4	70	1.305			CL11190.Contig1	comp31164_c0_seq1	0.354694	0.805793
	CL5422.Contig1	67 996 Pyridoxal biosynthesis protein PDX1.3 [Arabidopsis thaliana] >gi|45477193|sp|Q8L940.2|PDX13_ARATH RecName: Full=Pyridoxal biosynthesis protein PDX1.3; Short=AtPDX1.3; Short=AtPDX1;1 >gi|16226309|gb|AAL16130.1|AF428298_1 AT5g01410/T10O8_120		6	230	0.717			CL5422.Contig1	comp31400_c1_seq4	0.831836	0.413623
	Unigene19384	4 1332 minus strand FLK [Arabidopsis thaliana] >gi|61661326|gb|AAX51269.1| FLK [Arabidopsis thaliana]		17	402	0.763	*	-	Unigene19384	comp28281_c0_seq1	-0.690485	0.543692
	CL8801.Contig2	154 2292 glutamyl-tRNA synthetase [Arabidopsis thaliana] >gi|3435196|gb|AAC36469.1| glutamyl-tRNA synthetase [Arabidopsis thaliana] >gi|20466252|gb|AAM20443.1| glutamyl-tRNA synthetase [Arabidopsis thaliana] >gi|23198080|gb|AAN15567.1| glutamyl-t		12	306	1.734	*	+	CL8801.Contig2	comp31341_c0_seq1	-1.28288	0.139691
	Unigene17394	1 1152 hypothetical protein ARALYDRAFT_889368 [Arabidopsis lyrata subsp. lyrata] >gi|297338886|gb|EFH69303.1| hypothetical protein ARALYDRAFT_889368 [Arabidopsis lyrata subsp. lyrata]		3	101	1.056			Unigene17394	comp21660_c0_seq1	-0.659021	0.630342
	CL582.Contig1	1 2046 adaptin family protein [Arabidopsis lyrata subsp. lyrata] >gi|297317313|gb|EFH47735.1| adaptin family protein [Arabidopsis lyrata subsp. lyrata]		2	55	0.984			CL582.Contig1	comp29271_c0_seq1	-0.496416	0.669116
	CL12333.Contig3	41 400 minus strand adenylosuccinate synthetase [Arabidopsis thaliana] >gi|2500026|sp|Q96529.1|PURA_ARATH RecName: Full=Adenylosuccinate synthetase, chloroplastic; Short=AMPSase; Short=AdSS; AltName: Full=IMP--aspartate ligase; Flags: Precursor		3	177	0.437	*	-	CL12333.Contig3	comp29929_c0_seq1	0.446864	0.726169
	CL2427.Contig3	145 1179 adenosine kinase 2 [Arabidopsis thaliana] >gi|17366963|sp|Q9LZG0.1|ADK2_ARATH RecName: Full=Adenosine kinase 2; Short=AK 2; AltName: Full=Adenosine 5&apos;-phosphotransferase 2 >gi|12017764|gb|AAG45247.1|AF180895_1 adenosine kinase 2 [Ar		27	1280	1.137			CL2427.Contig3	comp30565_c0_seq1	1.47221	0.0847435
	Unigene24046	1 570 predicted protein [Arabidopsis lyrata subsp. lyrata] >gi|297338482|gb|EFH68899.1| predicted protein [Arabidopsis lyrata subsp. lyrata]		4	231	0.822			Unigene24046	comp26067_c1_seq1	0.136086	0.97639
	Unigene29575	12 347 minus strand uncharacterized protein [Arabidopsis thaliana] >gi|332640097|gb|AEE73618.1| uncharacterized protein [Arabidopsis thaliana]		3	91	1.587			Unigene29575	comp27937_c1_seq2	34.3238	1.55e-05	+
	CL7474.Contig1	2 973 argininosuccinate lyase [Arabidopsis thaliana] >gi|8979726|emb|CAB96847.1| argininosuccinate lyase (AtArgH) [Arabidopsis thaliana] >gi|24030227|gb|AAN41291.1| argininosuccinate lyase (AtArgH) [Arabidopsis thaliana] >gi|332004226|gb|AED91609		2	43	1.13			CL7474.Contig1	comp30298_c0_seq1	1.02832	0.467855
	CL3018.Contig1	1 558 minus strand hypothetical protein ARALYDRAFT_488823 [Arabidopsis lyrata subsp. lyrata] >gi|297319781|gb|EFH50203.1| hypothetical protein ARALYDRAFT_488823 [Arabidopsis lyrata subsp. lyrata]		4	53	0.759			CL3018.Contig1	comp31707_c2_seq1	0.376832	0.781895
	CL1726.Contig1	3 2531 unnamed protein product [Thellungiella halophila]		5	153	1.161			CL1726.Contig1	comp13722_c0_seq1	0.879103	0.643979
	CL1454.Contig1	2 2182 minus strand T5E21.13 [Arabidopsis thaliana]		4	243	1.673			CL1454.Contig1	comp28276_c0_seq1	-0.001453	1
	CL12197.Contig1	80 688 minus strand essential protein Yae1, N-terminal-domain-containing protein [Arabidopsis thaliana] >gi|332193605|gb|AEE31726.1| essential protein Yae1, N-terminal-domain-containing protein [Arabidopsis thaliana]		2	68	0.551	*	-	CL12197.Contig1	comp20731_c0_seq1	0.113569	1
	Unigene8614	597 1238 minus strand predicted protein [Arabidopsis thaliana] >gi|7270037|emb|CAB79853.1| predicted protein [Arabidopsis thaliana]		3	70	0.469			Unigene8614	comp34249_c0_seq1	8.47112	2.18e-11	+
	CL3564.Contig1	2 916 glycoside hydrolase family 28 protein [Arabidopsis lyrata subsp. lyrata] >gi|297322501|gb|EFH52922.1| glycoside hydrolase family 28 protein [Arabidopsis lyrata subsp. lyrata]		3	119	0.656			CL3564.Contig1	comp31419_c0_seq7	4.54653	0.00338082
	CL11587.Contig1	2 730 hypothetical protein ARALYDRAFT_479746 [Arabidopsis lyrata subsp. lyrata] >gi|297329195|gb|EFH59614.1| hypothetical protein ARALYDRAFT_479746 [Arabidopsis lyrata subsp. lyrata]		2	35	0.72			CL11587.Contig1	comp29041_c0_seq1	-0.474101	0.719654
	Unigene17218	1 711 predicted protein [Arabidopsis lyrata subsp. lyrata] >gi|297308963|gb|EFH39388.1| predicted protein [Arabidopsis lyrata subsp. lyrata]		10	282	1.133			Unigene17218	comp57479_c0_seq1	0.419672	0.822857
	CL3223.Contig1	10 1143 minus strand alcohol dehydrogenase class-3 [Arabidopsis thaliana] >gi|20141281|sp|Q96533.2|ADHX_ARATH RecName: Full=Alcohol dehydrogenase class-3; AltName: Full=Alcohol dehydrogenase class-III; AltName: Full=Glutathione-dependent formald		31	1158	1.066			CL3223.Contig1	comp30204_c1_seq1	-0.00932935	1
	Unigene22799	274 540 minus strand unnamed protein product [Thellungiella halophila]	Unigene22800	3	306	2.648			Unigene22799	comp70180_c0_seq1	30.9733	0.205076
	CL830.Contig13	259 771 unnamed protein product [Thellungiella halophila]	CL830.Contig14 CL830.Contig8 CL830.Contig9	9	1110	2.813	*	+	CL830.Contig13	comp12201_c0_seq1	-0.677845	0.714256
	CL14092.Contig1	28 447 minus strand chitinase-like protein [Arabidopsis thaliana] >gi|330255202|gb|AEC10296.1| chitinase-like protein [Arabidopsis thaliana]		6	251	1.03			CL14092.Contig1	comp30681_c0_seq1	-0.623397	0.707192
	CL1738.Contig1	24 3128 Nucleoporin autopeptidase [Arabidopsis thaliana] >gi|79317517|ref|NP_001031018.1| Nucleoporin autopeptidase [Arabidopsis thaliana] >gi|19310423|gb|AAL84948.1| At1g10390/F14N23_29 [Arabidopsis thaliana] >gi|27764948|gb|AAO23595.1| At1g1039		6	188	0.939			CL1738.Contig1	comp31883_c0_seq5	33.7088	0.000216757	+
	CL8852.Contig1	3 851 unknown [Arabidopsis thaliana]	CL8852.Contig2	2	109	0.92			CL8852.Contig1	comp25973_c0_seq6	0.0679259	1
	CL10582.Contig2	45 530 unnamed protein product [Thellungiella halophila]	CL10582.Contig3	6	223	3.621	*	+	CL10582.Contig2	comp94898_c0_seq1	-31.8597	0.0686039
	Unigene10388	131 1828 minus strand uncharacterized protein [Arabidopsis thaliana] >gi|4689474|gb|AAD27910.1| expressed protein [Arabidopsis thaliana] >gi|51536602|gb|AAU05539.1| At2g04280 [Arabidopsis thaliana] >gi|330250724|gb|AEC05818.1| uncharacterized pr		9	240	1.124			Unigene10388	comp20650_c0_seq1	0.522937	0.657732
	CL5163.Contig2	3 1946 minus strand SIT4 phosphatase-associated-like protein [Arabidopsis thaliana] >gi|332193102|gb|AEE31223.1| SIT4 phosphatase-associated-like protein [Arabidopsis thaliana]		2	44	0.766			CL5163.Contig2	comp32174_c0_seq1	2.41177	0.0286028
	CL11786.Contig3	5 676 minus strand RNA-binding protein cp33 [Arabidopsis lyrata subsp. lyrata] >gi|297321979|gb|EFH52400.1| RNA-binding protein cp33 [Arabidopsis lyrata subsp. lyrata]		3	57	0.72			CL11786.Contig3	comp4353_c0_seq1	0.376603	1
	CL4954.Contig1	282 647 minus strand copper chaperone [Arabidopsis thaliana] >gi|13605758|gb|AAK32872.1|AF361860_1 AT3g56240/F18O21_200 [Arabidopsis thaliana] >gi|3168840|gb|AAC33510.1| copper homeostasis factor [Arabidopsis thaliana] >gi|7572922|emb|CAB87423.1	CL4954.Contig2	14	355	0.936			CL4954.Contig1	comp26248_c0_seq5	1.63686	0.0609743
	Unigene2416	125 2554 minus strand zinc finger family protein [Arabidopsis lyrata subsp. lyrata] >gi|297324282|gb|EFH54703.1| zinc finger family protein [Arabidopsis lyrata subsp. lyrata]		4	73	0.763			Unigene2416	comp30804_c0_seq1	-0.902322	0.353433
	CL7339.Contig2	179 1384 minus strand EMB1144 [Arabidopsis lyrata subsp. lyrata] >gi|297339977|gb|EFH70394.1| EMB1144 [Arabidopsis lyrata subsp. lyrata]		10	314	0.845			CL7339.Contig2	comp30583_c0_seq1	-0.0740103	1
	CL8195.Contig1	21 1163 minus strand predicted protein [Arabidopsis lyrata subsp. lyrata] >gi|297339268|gb|EFH69685.1| predicted protein [Arabidopsis lyrata subsp. lyrata]		13	309	4.243	*	+	CL8195.Contig1	comp29971_c0_seq4	36.922	2.92e-11	+
	CL6285.Contig1	95 484 minus strand RecName: Full=40S ribosomal protein S15a; AltName: Full=PPCB8 >gi|17863|emb|CAA42599.1| r-protein BnS15a [Brassica napus] >gi|119720818|gb|ABL97979.1| 40S ribosomal protein S15a [Brassica rapa]	CL6285.Contig2 CL14629.Contig1	8	256	1.872			CL6285.Contig1	comp23056_c0_seq1	1.57189	0.0664137
	CL7158.Contig1	162 1178 minus strand transducin family protein [Arabidopsis lyrata subsp. lyrata] >gi|297327769|gb|EFH58189.1| transducin family protein [Arabidopsis lyrata subsp. lyrata]	CL7158.Contig2 CL7158.Contig3	2	55	0.65			CL7158.Contig1	comp26435_c0_seq2	31.6351	0.0974087
	Unigene20555	92 694 minus strand unnamed protein product [Thellungiella halophila]		25	728	0.987			Unigene20555	comp75203_c0_seq1	-0.693786	0.948145
	CL3856.Contig2	126 1463 minus strand senescence-associated cysteine protease [Brassica oleracea]		15	573	0.784	*	-	CL3856.Contig2	comp26987_c0_seq6	-2.89286	0.000705527	-
	Unigene23658	98 1597 minus strand hypothetical protein ARALYDRAFT_496583 [Arabidopsis lyrata subsp. lyrata] >gi|297312418|gb|EFH42842.1| hypothetical protein ARALYDRAFT_496583 [Arabidopsis lyrata subsp. lyrata]		3	147	1.046			Unigene23658	comp36160_c0_seq1	-1.4686	0.0988475
	CL14112.Contig1	142 1092 minus strand double-stranded-RNA-binding protein 4 [Arabidopsis thaliana] >gi|197267565|dbj|BAG69145.1| dsRNA-binding protein [Arabidopsis thaliana] >gi|332646874|gb|AEE80395.1| double-stranded-RNA-binding protein 4 [Arabidopsis thalian	CL14112.Contig2	4	113	0.964			CL14112.Contig1	comp31350_c1_seq2	1.10193	0.317642
	CL2641.Contig1	68 691 minus strand kunitz trypsin inhibitor 1 [Arabidopsis thaliana] >gi|332197314|gb|AEE35435.1| kunitz trypsin inhibitor 1 [Arabidopsis thaliana]		3	81	1.389			CL2641.Contig1	comp17505_c0_seq1	-3.57759	0.00591794
	CL4585.Contig1	10 1161 minus strand unnamed protein product [Thellungiella halophila]		4	341	0.691			CL4585.Contig1	comp27113_c0_seq6	-34.6226	4.41e-06	-
	CL2857.Contig2	219 836 minus strand CBS domain-containing protein [Arabidopsis lyrata subsp. lyrata] >gi|297319318|gb|EFH49740.1| CBS domain-containing protein [Arabidopsis lyrata subsp. lyrata]	CL2857.Contig4	5	403	0.635			CL2857.Contig2	comp28000_c0_seq1	0.657339	0.583691
	CL6649.Contig1	72 854 ribosome recycling factor [Arabidopsis thaliana] >gi|34146850|gb|AAQ62433.1| At3g01800 [Arabidopsis thaliana] >gi|332640195|gb|AEE73716.1| ribosome recycling factor [Arabidopsis thaliana]	CL6649.Contig2	2	76	1.344			CL6649.Contig1	comp26856_c2_seq1	0.154211	0.96997
	CL1417.Contig1	98 412 hypothetical protein ARALYDRAFT_915104 [Arabidopsis lyrata subsp. lyrata] >gi|297315993|gb|EFH46416.1| hypothetical protein ARALYDRAFT_915104 [Arabidopsis lyrata subsp. lyrata]		2	176	0.572			CL1417.Contig1	comp27019_c0_seq3	34.5445	5.58e-06	+
	Unigene22928	205 1173 RecName: Full=3-oxoacyl-[acyl-carrier-protein] reductase 1, chloroplastic; AltName: Full=3-ketoacyl-acyl carrier protein reductase 1; AltName: Full=Beta-keto acyl-carrier protein reductase 1; Flags: Precursor >gi|14422263|emb|CAC41370.1|		6	175	0.925			Unigene22928	comp28543_c0_seq3	31.5981	0.0974087
	CL8380.Contig1	121 1521 minus strand cystathionine beta-lyase [Arabidopsis thaliana] >gi|1708993|sp|P53780.1|METC_ARATH RecName: Full=Cystathionine beta-lyase, chloroplastic; Short=CBL; AltName: Full=Beta-cystathionase; AltName: Full=Cysteine lyase; Flags: Pre		4	126	0.927			CL8380.Contig1	comp27478_c0_seq2	3.1075	0.000164498	+
	CL9754.Contig1	153 1175 mitochondrial malate dehydrogenase [Arabidopsis lyrata subsp. lyrata] >gi|297340272|gb|EFH70689.1| mitochondrial malate dehydrogenase [Arabidopsis lyrata subsp. lyrata]		45	2551	0.386			CL9754.Contig1	comp27310_c0_seq1	-0.549868	0.643979
	CL2712.Contig1	196 2052 minus strand hypothetical protein ARALYDRAFT_899691 [Arabidopsis lyrata subsp. lyrata] >gi|297329694|gb|EFH60113.1| hypothetical protein ARALYDRAFT_899691 [Arabidopsis lyrata subsp. lyrata]		5	159	1.106			CL2712.Contig1	comp26178_c0_seq1	1.2431	0.16424
	CL77.Contig1	25 849 endochitinase [Brassica rapa subsp. chinensis]		37	1597	0.561	*	-	CL77.Contig1	comp21931_c0_seq1	1.09209	0.606426
	CL9405.Contig1	310 717 T23O15.3/T23O15.3 [Arabidopsis thaliana]	CL9405.Contig2 CL9405.Contig3 CL9405.Contig4	3	62	1.881			CL9405.Contig1	comp26422_c0_seq3	1.04067	0.57649
	CL3789.Contig1	3 1163 hypothetical protein ARALYDRAFT_486159 [Arabidopsis lyrata subsp. lyrata] >gi|297323972|gb|EFH54393.1| hypothetical protein ARALYDRAFT_486159 [Arabidopsis lyrata subsp. lyrata]		2	68	3.994			CL3789.Contig1	comp31384_c0_seq7	2.21195	0.0521777
	CL10836.Contig1	2 148 hypothetical protein ARALYDRAFT_482625 [Arabidopsis lyrata subsp. lyrata] >gi|297327284|gb|EFH57704.1| hypothetical protein ARALYDRAFT_482625 [Arabidopsis lyrata subsp. lyrata]	CL10836.Contig2	3	55	0.803			CL10836.Contig1	comp25628_c2_seq2	-35.8816	8.47e-09	-
	Unigene29716	113 406 putative protein [Arabidopsis thaliana] >gi|7270312|emb|CAB80081.1| putative protein [Arabidopsis thaliana]		4	102	1.898	*	+	Unigene29716	comp33066_c0_seq1	0.910477	0.356889
	CL4973.Contig3	143 733 minus strand Translation initiation factor SUI1 family protein [Arabidopsis thaliana] >gi|332004353|gb|AED91736.1| Translation initiation factor SUI1 family protein [Arabidopsis thaliana]	Unigene28305	2	48	1.615			CL4973.Contig3	comp28708_c0_seq1	0.518622	0.710065
	CL9274.Contig1	14 1201 NADPH2:quinone reductase [Arabidopsis thaliana] >gi|119935943|gb|ABM06041.1| At5g61510 [Arabidopsis thaliana] >gi|332010094|gb|AED97477.1| NADPH2:quinone reductase [Arabidopsis thaliana]	CL9274.Contig2	3	109	0.813			CL9274.Contig1	comp28391_c0_seq2	0.608347	0.63654
	CL11601.Contig2	117 806 minus strand putative manganese superoxide dismutase 1 [Brassica napus]		5	256	0.813			CL11601.Contig2	comp48297_c0_seq1	0.422407	0.778078
	CL752.Contig1	49 462 Lamin-like protein OS=Arabidopsis thaliana GN=At5g15350 PE=1 SV=1		14	250	0.446	*	-	CL752.Contig1	comp29984_c0_seq1	3.36801	0.000144752	+
	CL3378.Contig1	93 1421 minus strand 26S proteasome regulatory subunit 4-A [Arabidopsis thaliana] >gi|75337900|sp|Q9SZD4.1|PRS4A_ARATH RecName: Full=26S proteasome regulatory subunit 4 homolog A; AltName: Full=26S proteasome AAA-ATPase subunit RPT2a; AltName: F		13	490	1.935			CL3378.Contig1	comp31706_c1_seq1	-0.145307	0.976035
	CL8292.Contig1	131 1306 minus strand Chain A, Structure Of Arabidopsis Atserpin1. Native Stressed Conforma		27	630	0.625	*	-	CL8292.Contig1	comp29132_c0_seq1	-0.371525	0.77873
	Unigene25968	15 752 plant UBX domain-containing protein 1 [Arabidopsis lyrata subsp. lyrata] >gi|297322874|gb|EFH53295.1| plant UBX domain-containing protein 1 [Arabidopsis lyrata subsp. lyrata]		3	102	0.886			Unigene25968	comp28728_c0_seq1	-0.319391	0.852216
	Unigene26490	2 1351 mthsc70-1 [Arabidopsis lyrata subsp. lyrata] >gi|297312760|gb|EFH43183.1| mthsc70-1 [Arabidopsis lyrata subsp. lyrata]		15	858	0.909			Unigene26490	comp114005_c0_seq1	-1.20836	0.889098
	CL1202.Contig10	606 965 minus strand hypothetical protein ARALYDRAFT_478924 [Arabidopsis lyrata subsp. lyrata] >gi|297328746|gb|EFH59165.1| hypothetical protein ARALYDRAFT_478924 [Arabidopsis lyrata subsp. lyrata]	CL1202.Contig11 CL1202.Contig3 CL1202.Contig4 CL1202.Contig8 CL1202.Contig9	2	77	2.471	*	+	CL1202.Contig10	comp14128_c0_seq1	-2.62033	0.00150403
	CL14564.Contig1	101 757 minus strand inorganic pyrophosphatase [Arabidopsis lyrata subsp. lyrata] >gi|297332001|gb|EFH62420.1| inorganic pyrophosphatase [Arabidopsis lyrata subsp. lyrata]	CL14564.Contig2	7	174	1.188			CL14564.Contig1	comp26262_c0_seq2	0.981594	0.423493
	CL6346.Contig2	123 536 minus strand hypothetical protein ARALYDRAFT_480649 [Arabidopsis lyrata subsp. lyrata] >gi|297331961|gb|EFH62380.1| hypothetical protein ARALYDRAFT_480649 [Arabidopsis lyrata subsp. lyrata]		6	269	1.237			CL6346.Contig2	comp25534_c0_seq1	-0.0684293	1
	Unigene8449	144 383 uncharacterized protein [Arabidopsis thaliana] >gi|34365641|gb|AAQ65132.1| At3g48180 [Arabidopsis thaliana] >gi|332644856|gb|AEE78377.1| uncharacterized protein [Arabidopsis thaliana]		3	51	0.584	*	-	Unigene8449	comp14339_c0_seq1	-5.71086	4.95e-07	-
	CL3505.Contig2	1 534 minus strand zinc finger family protein [Arabidopsis lyrata subsp. lyrata] >gi|297329050|gb|EFH59469.1| zinc finger family protein [Arabidopsis lyrata subsp. lyrata]		2	118	0.969			CL3505.Contig2	comp26864_c0_seq3	-1.48764	0.726169
	Unigene2347	122 1567 aspartyl protease family protein [Arabidopsis lyrata subsp. lyrata] >gi|297337916|gb|EFH68333.1| aspartyl protease family protein [Arabidopsis lyrata subsp. lyrata]		5	114	0.869			Unigene2347	comp30618_c0_seq1	4.42992	2.78e-06	+
	Unigene30544	1 228 minus strand hypothetical protein ARALYDRAFT_906847 [Arabidopsis lyrata subsp. lyrata] >gi|297323814|gb|EFH54235.1| hypothetical protein ARALYDRAFT_906847 [Arabidopsis lyrata subsp. lyrata]		7	158	0.602			Unigene30544	comp26343_c0_seq2	2.25107	0.0729034
	Unigene16435	33 587 minus strand Disease resistance-responsive (dirigent-like protein) family protein [Arabidopsis thaliana] >gi|28372910|gb|AAO39937.1| At1g58170 [Arabidopsis thaliana] >gi|332195384|gb|AEE33505.1| Disease resistance-responsive (dirigent-lik		10	209	0.413	*	-	Unigene16435	comp21225_c0_seq1	-1.3396	0.196117
	CL10451.Contig5	53 268 minus strand peroxidase [Brassica napus]		8	314	0.61	*	-	CL10451.Contig5	comp23002_c0_seq2	1.47582	0.0986919
	CL1522.Contig1	178 1143 minus strand O-acetylserine(thiol)lyase isoform A4 [Brassica rapa subsp. chinensis]	CL1522.Contig2	19	676	1.095			CL1522.Contig1	comp30389_c0_seq3	-0.854194	0.375378
	CL13301.Contig1	135 470 FK506-binding protein 12 kD [Arabidopsis lyrata subsp. lyrata] >gi|297312446|gb|EFH42870.1| FK506-binding protein 12 kD [Arabidopsis lyrata subsp. lyrata]		19	947	0.778	*	-	CL13301.Contig1	comp28141_c3_seq1	0.713356	0.479674
	CL1602.Contig2	2 787 unnamed protein product [Thellungiella halophila]		2	213	1.307	*	+	CL1602.Contig2	comp24909_c0_seq1	2.29414	0.105499
	CL13450.Contig1	88 2172 minus strand transcription regulator NOT2/NOT3/NOT5 family protein [Arabidopsis lyrata subsp. lyrata] >gi|297319715|gb|EFH50137.1| transcription regulator NOT2/NOT3/NOT5 family protein [Arabidopsis lyrata subsp. lyrata]		3	194	1.496			CL13450.Contig1	comp31628_c1_seq5	-0.258191	0.915127
	CL10581.Contig2	12 1235 minus strand La domain-containing protein [Arabidopsis lyrata subsp. lyrata] >gi|297314888|gb|EFH45311.1| La domain-containing protein [Arabidopsis lyrata subsp. lyrata]		3	230	0.563	*	-	CL10581.Contig2	comp29663_c0_seq2	1.53975	0.217131
	Unigene2831	94 2616 minus strand alpha-glucan phosphorylase 2 [Arabidopsis lyrata subsp. lyrata] >gi|297323372|gb|EFH53793.1| alpha-glucan phosphorylase 2 [Arabidopsis lyrata subsp. lyrata]		19	682	1.068			Unigene2831	comp1518_c0_seq1	-0.623397	1
	CL10610.Contig1	57 1370 minus strand acetylornithine deacetylase, putative [Brassica oleracea]	CL10610.Contig2	8	243	1.06			CL10610.Contig1	comp32089_c1_seq1	0.303591	0.841423
	Unigene28598	21 1658 myrosinase [Raphanus sativus]		20	1617	1.066			Unigene28598	comp31195_c0_seq2	0.00718825	1
	CL2814.Contig1	128 979 RNA recognition motif-containing protein [Arabidopsis thaliana] >gi|21537200|gb|AAM61541.1| RNA recognition motif-containing protein SEB-4 [Arabidopsis thaliana] >gi|124300976|gb|ABN04740.1| At1g78260 [Arabidopsis thaliana] >gi|332197966|		2	74	0.524	*	-	CL2814.Contig1	comp16002_c0_seq1	-1.18262	0.565875
	CL323.Contig2	42 1019 minus strand RecName: Full=RuBisCO large subunit-binding protein subunit beta, chloroplastic; AltName: Full=60 kDa chaperonin subunit beta; AltName: Full=CPN-60 beta; Flags: Precursor >gi|167117|gb|AAA32980.1| 60-kDa beta-polypeptide of		7	248	1.512			CL323.Contig2	comp27503_c1_seq1	3.3152	0.00319686
	CL14072.Contig1	140 1105 minus strand vire2-interacting protein VIP1 [Arabidopsis lyrata subsp. lyrata] >gi|297337109|gb|EFH67526.1| vire2-interacting protein VIP1 [Arabidopsis lyrata subsp. lyrata]		9	164	0.827			CL14072.Contig1	comp28128_c0_seq1	0.968518	0.414367
	CL202.Contig2	45 1076 peroxidase 30, partial [Brassica rapa]		46	997	0.391	*	-	CL202.Contig2	comp32883_c0_seq1	1.60131	0.0621028
	CL3335.Contig2	111 1007 minus strand 5,10-methylenetetrahydrofolate dehydrogenase:5,10-methenyltetrahydrofolate cyclohydrolase, putative [Arabidopsis thaliana]		5	274	1.232			CL3335.Contig2	comp20707_c0_seq4	35.2845	1.7e-07	+
	CL1696.Contig1	212 2074 minus strand cellulase [Brassica napus]	CL1696.Contig2 Unigene28906	3	96	1.096			CL1696.Contig1	comp29569_c0_seq2	0.28877	0.968647
	CL1742.Contig2	91 1188 hypothetical protein ARALYDRAFT_490165 [Arabidopsis lyrata subsp. lyrata] >gi|297318574|gb|EFH48996.1| hypothetical protein ARALYDRAFT_490165 [Arabidopsis lyrata subsp. lyrata]		6	262	0.823			CL1742.Contig2	comp31954_c1_seq2	-1.29273	0.445333
	CL3767.Contig2	1 2409 minus strand calcium-binding EF-hand-containing protein [Arabidopsis thaliana] >gi|332192007|gb|AEE30128.1| calcium-binding EF-hand-containing protein [Arabidopsis thaliana]		7	125	1.258			CL3767.Contig2	comp20095_c1_seq1	-1.94533	0.288943
	Unigene2086	1 1251 minus strand hypothetical protein ARALYDRAFT_488300 [Arabidopsis lyrata subsp. lyrata] >gi|297319516|gb|EFH49938.1| hypothetical protein ARALYDRAFT_488300 [Arabidopsis lyrata subsp. lyrata]		6	171	1.214			Unigene2086	comp27445_c0_seq1	-0.960432	0.320776
	CL83.Contig2	174 614 minus strand ubiquitin-conjugating enzyme E2 variant 1D [Arabidopsis thaliana] >gi|332645439|gb|AEE78960.1| ubiquitin-conjugating enzyme E2 variant 1D [Arabidopsis thaliana]		18	728	0.772	*	-	CL83.Contig2	comp27538_c0_seq6	3.65558	0.257553
	CL4242.Contig1	160 873 hypothetical protein ARALYDRAFT_471353 [Arabidopsis lyrata subsp. lyrata] >gi|297335753|gb|EFH66170.1| hypothetical protein ARALYDRAFT_471353 [Arabidopsis lyrata subsp. lyrata]	CL4242.Contig2	10	223	0.689			CL4242.Contig1	comp23286_c0_seq1	-1.25108	0.15687
	CL6792.Contig2	185 1243 minus strand unnamed protein product [Thellungiella halophila]	CL6792.Contig3 CL6792.Contig4 CL6792.Contig5	2	66	0.993			CL6792.Contig2	comp26606_c0_seq4	0.243356	0.890309
	CL6528.Contig2	120 1613 minus strand alanine-2-oxoglutarate aminotransferase 1 [Arabidopsis lyrata subsp. lyrata] >gi|297339119|gb|EFH69536.1| alanine-2-oxoglutarate aminotransferase 1 [Arabidopsis lyrata subsp. lyrata]		2	48	0.635	*	-	CL6528.Contig2	comp31719_c0_seq1	-1.70775	0.0815987
	CL1960.Contig10	184 1728 minus strand unnamed protein product [Thellungiella halophila]	CL1960.Contig4 CL1960.Contig7	10	1253	1.099			CL1960.Contig10	comp30352_c0_seq1	-2.08852	0.0184434
	Unigene24355	888 2084 minus strand hypothetical protein ARALYDRAFT_473200 [Arabidopsis lyrata subsp. lyrata] >gi|297336679|gb|EFH67096.1| hypothetical protein ARALYDRAFT_473200 [Arabidopsis lyrata subsp. lyrata]		8	180	1.102			Unigene24355	comp25031_c0_seq1	31.4751	0.0974087
	CL7025.Contig2	233 1744 SEC14 cytosolic factor family protein [Arabidopsis lyrata subsp. lyrata] >gi|297334701|gb|EFH65119.1| SEC14 cytosolic factor family protein [Arabidopsis lyrata subsp. lyrata]		11	330	1.538			CL7025.Contig2	comp28070_c0_seq1	-1.41272	0.156064
	CL6512.Contig1	2 1918 heat repeat-containing protein [Arabidopsis lyrata subsp. lyrata] >gi|297327574|gb|EFH57994.1| heat repeat-containing protein [Arabidopsis lyrata subsp. lyrata]	CL6512.Contig2	4	146	1.163			CL6512.Contig1	comp30453_c0_seq2	0.0390138	1
	CL785.Contig1	74 502 minus strand ST45-109 [Eutrema halophilum]	CL785.Contig2	4	100	1.257			CL785.Contig1	comp28499_c0_seq1	-1.9954	0.0612592
	CL212.Contig1	141 740 minus strand hypothetical protein ARALYDRAFT_482209 [Arabidopsis lyrata subsp. lyrata] >gi|297325248|gb|EFH55668.1| hypothetical protein ARALYDRAFT_482209 [Arabidopsis lyrata subsp. lyrata]	CL212.Contig2	4	98	1.581			CL212.Contig1	comp32249_c0_seq7	0.0727488	1
	Unigene28127	200 1918 minus strand eukaryotic translation initiation factor-like protein [Arabidopsis thaliana] >gi|14335084|gb|AAK59821.1| At1g11480/T23J18_15 [Arabidopsis thaliana] >gi|21464549|gb|AAM52229.1| At1g11480/T23J18_15 [Arabidopsis thaliana] >gi|		6	138	0.834			Unigene28127	comp11448_c1_seq1	-0.0720715	1
	Unigene625	168 1298 minus strand actin 7 [Brassica rapa subsp. pekinensis]	Unigene1432 Unigene1514	3	1378	1.143			Unigene625	comp31953_c1_seq3	0.365567	0.779969
	CL5662.Contig1	77 529 minus strand FK506-binding protein 15 kD-1 [Arabidopsis lyrata subsp. lyrata] >gi|297329431|gb|EFH59850.1| FK506-binding protein 15 kD-1 [Arabidopsis lyrata subsp. lyrata]	CL5662.Contig2	4	381	0.931			CL5662.Contig1	comp33192_c0_seq1	-0.0478949	1
	CL4239.Contig3	165 1769 minus strand hypothetical protein ARALYDRAFT_477487 [Arabidopsis lyrata subsp. lyrata] >gi|297330165|gb|EFH60584.1| hypothetical protein ARALYDRAFT_477487 [Arabidopsis lyrata subsp. lyrata]		12	436	1.232			CL4239.Contig3	comp92477_c0_seq1	0.376603	1
	CL3722.Contig3	118 825 aluminum-induced protein [Brassica rapa]		6	207	1.176			CL3722.Contig3	comp29229_c0_seq2	-31.7762	0.0686039
	Unigene3000	215 670 minus strand ubiquitin-conjugating enzyme E2 A [Arabidopsis thaliana] >gi|297814522|ref|XP_002875144.1| ubiquiting-conjugating enzyme 2 [Arabidopsis lyrata subsp. lyrata] >gi|1174844|sp|P42745.1|UBC2_ARATH RecName: Full=Ubiquitin-conjuga	CL5755.Contig1 CL5755.Contig2 CL5755.Contig3 CL5755.Contig4 CL5755.Contig5 Unigene24781 Unigene24782 Unigene24783	2	32	1.469			Unigene3000	comp25679_c0_seq2	-4.15035	0.00246772
	Unigene1650	75 914 minus strand biotin/lipoyl attachment domain-containing protein [Arabidopsis lyrata subsp. lyrata] >gi|297322188|gb|EFH52609.1| biotin/lipoyl attachment domain-containing protein [Arabidopsis lyrata subsp. lyrata]		5	174	1.02			Unigene1650	comp27896_c0_seq1	0.182661	0.940561
	CL2807.Contig1	75 503 hypothetical protein ARALYDRAFT_486090 [Arabidopsis lyrata subsp. lyrata] >gi|297322207|gb|EFH52628.1| hypothetical protein ARALYDRAFT_486090 [Arabidopsis lyrata subsp. lyrata]		3	181	1.135			CL2807.Contig1	comp93144_c0_seq1	-0.623397	1
	CL7375.Contig1	212 1054 minus strand unnamed protein product [Thellungiella halophila]	CL7375.Contig2	5	145	1.186			CL7375.Contig1	comp27013_c0_seq2	-1.39056	0.166829
	CL11551.Contig1	42 1310 unnamed protein product [Thellungiella halophila]		6	140	1.475	*	+	CL11551.Contig1	comp26400_c0_seq2	1.6297	0.0720457
	CL12043.Contig5	220 1317 minus strand mitochondrial phosphate transporter [Arabidopsis lyrata subsp. lyrata] >gi|297319482|gb|EFH49904.1| mitochondrial phosphate transporter [Arabidopsis lyrata subsp. lyrata]	CL12043.Contig6	6	232	1.023			CL12043.Contig5	comp28445_c0_seq4	-33.6306	0.000314086	-
	Unigene1991	80 616 hypothetical protein ARALYDRAFT_894991 [Arabidopsis lyrata subsp. lyrata] >gi|297333214|gb|EFH63632.1| hypothetical protein ARALYDRAFT_894991 [Arabidopsis lyrata subsp. lyrata]		2	67	0.826			Unigene1991	comp45574_c0_seq1	-0.0928823	1
	Unigene2089	94 519 40S ribosomal protein S23-2 [Arabidopsis thaliana] >gi|297810373|ref|XP_002873070.1| 40S ribosomal protein S23 [Arabidopsis lyrata subsp. lyrata] >gi|27735238|sp|P49201.2|RS232_ARATH RecName: Full=40S ribosomal protein S23-2; AltName: Full	CL3557.Contig2 CL3557.Contig3	5	121	2.254			Unigene2089	comp30099_c1_seq3	33.0068	0.00275059
	CL4912.Contig1	11 769 ARF-GAP domain 8 [Arabidopsis lyrata subsp. lyrata] >gi|297309226|gb|EFH39650.1| ARF-GAP domain 8 [Arabidopsis lyrata subsp. lyrata]	CL4912.Contig2	8	237	1.446			CL4912.Contig1	comp32001_c1_seq2	-0.0679869	1
	CL6065.Contig1	166 1686 minus strand aspartic protease [Brassica napus]	CL6065.Contig2	3	764	2.98			CL6065.Contig1	comp30842_c1_seq1	-0.886756	0.3508
	CL4191.Contig1	76 504 minus strand peptidyl-prolyl cis-trans isomerase PPIC-type family protein [Arabidopsis lyrata subsp. lyrata] >gi|297339241|gb|EFH69658.1| peptidyl-prolyl cis-trans isomerase PPIC-type family protein [Arabidopsis lyrata subsp. lyrata]	CL4191.Contig2	6	232	0.539	*	-	CL4191.Contig1	comp24946_c1_seq2	-0.535661	0.643979
	Unigene29031	2 262 minus strand pfkB-type carbohydrate kinase family protein [Arabidopsis lyrata subsp. lyrata] >gi|297327011|gb|EFH57431.1| pfkB-type carbohydrate kinase family protein [Arabidopsis lyrata subsp. lyrata]		6	237	1.644	*	+	Unigene29031	comp27434_c0_seq2	3.27252	0.000264905	+
	Unigene28617	151 1134 minus strand hypothetical protein ARALYDRAFT_910048 [Arabidopsis lyrata subsp. lyrata] >gi|297317758|gb|EFH48180.1| hypothetical protein ARALYDRAFT_910048 [Arabidopsis lyrata subsp. lyrata]		30	730	0.666	*	-	Unigene28617	comp26842_c0_seq1	-0.0767156	1
	Unigene22300	75 413 minus strand copper ion binding protein [Arabidopsis thaliana] >gi|25091508|sp|Q9ZUX4.1|UMP2_ARATH RecName: Full=Uncharacterized protein At2g27730, mitochondrial >gi|3860259|gb|AAC73027.1| expressed protein [Arabidopsis thaliana] >gi|3302	Unigene22301	4	64	1.234			Unigene22300	comp29339_c1_seq1	0.171733	0.959429
	CL1937.Contig1	187 1836 minus strand hypothetical protein ARALYDRAFT_491623 [Arabidopsis lyrata subsp. lyrata] >gi|297315177|gb|EFH45600.1| hypothetical protein ARALYDRAFT_491623 [Arabidopsis lyrata subsp. lyrata]		9	320	1.073			CL1937.Contig1	comp26780_c0_seq3	-1.05636	0.37487
	CL3695.Contig2	2 1252 minus strand glutamate decarboxylase 2 [Brassica juncea]		17	576	1.7	*	+	CL3695.Contig2	comp29471_c0_seq1	1.53926	0.0693861
	CL634.Contig1	40 1428 predicted protein [Arabidopsis lyrata subsp. lyrata] >gi|297331490|gb|EFH61909.1| predicted protein [Arabidopsis lyrata subsp. lyrata]		4	163	0.681			CL634.Contig1	comp18122_c0_seq1	34.2952	1.78e-05	+
	CL12891.Contig2	1 1014 minus strand hypothetical protein ARALYDRAFT_911635 [Arabidopsis lyrata subsp. lyrata] >gi|297320608|gb|EFH51030.1| hypothetical protein ARALYDRAFT_911635 [Arabidopsis lyrata subsp. lyrata]		3	227	0.804			CL12891.Contig2	comp57241_c0_seq1	31.8213	0.0686039
	Unigene29699	87 632 disease resistance-responsive family protein [Arabidopsis lyrata subsp. lyrata] >gi|297333758|gb|EFH64176.1| disease resistance-responsive family protein [Arabidopsis lyrata subsp. lyrata]		3	131	0.81			Unigene29699	comp24457_c0_seq1	-4.35132	7.62e-07	-
	Unigene19811	1 324 VHS domain-containing protein [Arabidopsis lyrata subsp. lyrata] >gi|297339002|gb|EFH69419.1| VHS domain-containing protein [Arabidopsis lyrata subsp. lyrata]		2	79	1.138			Unigene19811	comp17726_c0_seq1	0.497909	0.745894
	CL3350.Contig1	3 149 minus strand unnamed protein product [Thellungiella halophila]	CL3350.Contig2	4	76	0.426	*	-	CL3350.Contig1	comp19334_c0_seq3	32.1598	0.0251893
	Unigene16190	2 346 unnamed protein product [Thellungiella halophila]		2	92	1.231			Unigene16190	comp31218_c0_seq1	-0.154374	0.946723
	CL7038.Contig1	172 1851 hypothetical protein ARALYDRAFT_497166 [Arabidopsis lyrata subsp. lyrata] >gi|297308906|gb|EFH39347.1| hypothetical protein ARALYDRAFT_497166 [Arabidopsis lyrata subsp. lyrata]	CL7038.Contig2	5	191	1.027			CL7038.Contig1	comp31409_c0_seq6	2.37376	0.00777489
	Unigene20421	1 1119 5-oxoprolinase -like protein [Arabidopsis thaliana]		8	261	1.159			Unigene20421	comp24300_c0_seq1	-0.867654	0.356889
	Unigene24075	146 463 hypothetical protein ARALYDRAFT_915104 [Arabidopsis lyrata subsp. lyrata] >gi|297315993|gb|EFH46416.1| hypothetical protein ARALYDRAFT_915104 [Arabidopsis lyrata subsp. lyrata]		3	220	0.514	*	-	Unigene24075	comp27019_c0_seq1	0.319391	0.852408
	CL8358.Contig1	107 1420 unnamed protein product [Thellungiella halophila]		3	153	1.491			CL8358.Contig1	comp29216_c0_seq2	-1.03675	0.499218
	Unigene26486	55 459 predicted protein [Arabidopsis lyrata subsp. lyrata] >gi|297317852|gb|EFH48274.1| predicted protein [Arabidopsis lyrata subsp. lyrata]		3	230	0.95			Unigene26486	comp23336_c0_seq1	-0.480076	0.760319
	CL14404.Contig1	117 1505 minus strand 6-phosphofructokinase 6 [Arabidopsis thaliana] >gi|75181422|sp|Q9M076.1|K6PF6_ARATH RecName: Full=6-phosphofructokinase 6; AltName: Full=Phosphofructokinase 6; AltName: Full=Phosphohexokinase 6 >gi|29029114|gb|AAO64936.1| A		3	164	1.359			CL14404.Contig1	comp28210_c0_seq1	-0.263825	0.876899
	CL7226.Contig1	54 953 minus strand uncharacterized protein [Arabidopsis thaliana] >gi|332661729|gb|AEE87129.1| uncharacterized protein [Arabidopsis thaliana]	CL7226.Contig3	7	282	0.81			CL7226.Contig1	comp25700_c0_seq3	32.625	0.00777489
	CL13638.Contig1	111 1193 etfalpha [Arabidopsis lyrata subsp. lyrata] >gi|297340126|gb|EFH70543.1| etfalpha [Arabidopsis lyrata subsp. lyrata]	CL13638.Contig2	13	455	0.615	*	-	CL13638.Contig1	comp20038_c0_seq1	-1.4852	0.0969431
	CL4106.Contig1	115 777 vesicle-associated membrane protein 722 [Arabidopsis thaliana] >gi|21542460|sp|P47192.2|VA722_ARATH RecName: Full=Vesicle-associated membrane protein 722; Short=AtVAMP722; AltName: Full=Synaptobrevin-related protein 1 >gi|16930421|gb|AAL3	CL4106.Contig2 CL14229.Contig1	2	58	1.237			CL4106.Contig1	comp30146_c0_seq1	0.319003	0.948796
	CL7617.Contig3	164 1420 diphosphomevalonate decarboxylase [Arabidopsis thaliana] >gi|332645683|gb|AEE79204.1| diphosphomevalonate decarboxylase [Arabidopsis thaliana]	CL7617.Contig4	2	200	0.91			CL7617.Contig3	comp38683_c0_seq1	0.79164	0.707192
	Unigene15548	87 1145 minus strand ESTs gb|N97074, gb|T13943 and gb|R89965 come from this gene [Arabidopsis thaliana]		2	79	1.02			Unigene15548	comp32293_c0_seq1	1.56241	0.0658878
	CL4314.Contig1	2 1123 hypothetical protein ARALYDRAFT_484400 [Arabidopsis lyrata subsp. lyrata] >gi|297321152|gb|EFH51573.1| hypothetical protein ARALYDRAFT_484400 [Arabidopsis lyrata subsp. lyrata]		4	169	0.455			CL4314.Contig1	comp27297_c0_seq2	-32.8821	0.00455443
	CL13262.Contig1	2 1867 minus strand unnamed protein product [Thellungiella halophila]		5	179	1.207			CL13262.Contig1	comp31177_c0_seq1	-0.171904	0.938728
	Unigene6784	92 553 minus strand spliceosomal protein U1A [Arabidopsis thaliana] >gi|75319458|sp|Q39244.1|RU1A_ARATH RecName: Full=U1 small nuclear ribonucleoprotein A; Short=U1 snRNP protein A >gi|1050430|emb|CAA90283.1| U1snRNP-specific protein [Arabidopsi		2	51	0.896			Unigene6784	comp14760_c1_seq1	0.431465	0.773463
	Unigene2474	205 2514 minus strand hypothetical protein ARALYDRAFT_478841 [Arabidopsis lyrata subsp. lyrata] >gi|297330865|gb|EFH61284.1| hypothetical protein ARALYDRAFT_478841 [Arabidopsis lyrata subsp. lyrata]		8	127	0.673	*	-	Unigene2474	comp31078_c0_seq2	2.78176	0.000872686	+
	CL2948.Contig3	91 315 minus strand ribosomal protein S11-beta [Arabidopsis lyrata subsp. lyrata] >gi|297319982|gb|EFH50404.1| ribosomal protein S11-beta [Arabidopsis lyrata subsp. lyrata]		2	76	1.175			CL2948.Contig3	comp48426_c0_seq1	0.416131	0.840428
	Unigene10751	43 324 minus strand hypothetical protein ARALYDRAFT_492719 [Arabidopsis lyrata subsp. lyrata] >gi|297315717|gb|EFH46140.1| hypothetical protein ARALYDRAFT_492719 [Arabidopsis lyrata subsp. lyrata]		2	39	0.509			Unigene10751	comp25773_c0_seq1	-1.36036	0.294209
	CL2774.Contig1	216 821 dehydrin [Brassica juncea]		8	1005	1.234			CL2774.Contig1	comp30499_c1_seq2	36.2241	1.36e-09	+
	CL7005.Contig1	3 239 PAB4 binding protein 4 [Arabidopsis lyrata subsp. lyrata] >gi|297324519|gb|EFH54939.1| PAB4 binding protein 4 [Arabidopsis lyrata subsp. lyrata]		6	144	1.007			CL7005.Contig1	comp30875_c0_seq3	0.661744	0.621948
	CL6279.Contig2	55 621 hypothetical protein ARALYDRAFT_489363 [Arabidopsis lyrata subsp. lyrata] >gi|297320076|gb|EFH50498.1| hypothetical protein ARALYDRAFT_489363 [Arabidopsis lyrata subsp. lyrata]		6	118	1.928	*	+	CL6279.Contig2	comp24257_c1_seq2	3.70684	0.00170418
	Unigene25240	3 3794 minus strand protein ILITYHIA [Arabidopsis thaliana] >gi|332196168|gb|AEE34289.1| protein ILITYHIA [Arabidopsis thaliana]		7	198	1.293			Unigene25240	comp24578_c0_seq2	0.90264	0.366383
	CL6149.Contig1	214 1239 glycylpeptide N-tetradecanoyltransferase 1 [Arabidopsis thaliana] >gi|85541754|sp|Q9LTR9.2|NMT1_ARATH RecName: Full=Glycylpeptide N-tetradecanoyltransferase 1; AltName: Full=Myristoyl-CoA:protein N-myristoyltransferase 1; Short=NMT 1; Sh	CL6149.Contig2	2	124	2.021	*	+	CL6149.Contig1	comp24652_c0_seq2	0.246644	0.889098
	CL4280.Contig2	42 698 minus strand germin-like protein [Arabidopsis thaliana]		2	53	1.274			CL4280.Contig2	comp21591_c0_seq2	-0.666125	0.601436
	Unigene707	157 1932 minus strand NSP (nuclear shuttle protein)-interacting GTPase [Arabidopsis thaliana] >gi|30682446|ref|NP_849540.1| NSP (nuclear shuttle protein)-interacting GTPase [Arabidopsis thaliana] >gi|30725432|gb|AAP37738.1| At4g13350 [Arabidopsi		10	356	0.811			Unigene707	comp11448_c0_seq1	-1.16163	0.194336
	CL1537.Contig1	101 862 minus strand AT5g20480/F7C8_70 [Arabidopsis thaliana] >gi|29028752|gb|AAO64755.1| At5g20480/F7C8_70 [Arabidopsis thaliana]		5	86	0.661			CL1537.Contig1	comp24167_c0_seq1	-2.10627	0.194336
	CL3668.Contig1	150 1895 minus strand calcium-binding EF-hand domain-containing protein [Arabidopsis thaliana] >gi|332194787|gb|AEE32908.1| calcium-binding EF-hand domain-containing protein [Arabidopsis thaliana]		4	159	1.87			CL3668.Contig1	comp30989_c0_seq1	34.7915	1.86e-06	+
	CL4025.Contig4	107 718 minus strand proteasome subunit beta type-3-A [Arabidopsis thaliana] >gi|288558823|sp|Q9XI05.2|PSB3A_ARATH RecName: Full=Proteasome subunit beta type-3-A; AltName: Full=20S proteasome beta subunit C-1; AltName: Full=Proteasome component	CL4025.Contig5	2	153	0.983			CL4025.Contig4	comp28950_c1_seq5	-33.1874	0.00170759
	CL7712.Contig1	85 654 RecName: Full=40S ribosomal protein S7 >gi|5532505|gb|AAD44761.1|AF144752_1 40S ribosomal protein S7 homolog [Brassica oleracea]		3	114	1.282			CL7712.Contig1	comp20886_c0_seq1	-32.0297	0.0347447
	CL2541.Contig2	3 1067 hypothetical protein ARALYDRAFT_491673 [Arabidopsis lyrata subsp. lyrata] >gi|297315197|gb|EFH45620.1| hypothetical protein ARALYDRAFT_491673 [Arabidopsis lyrata subsp. lyrata]		4	104	1.95	*	+	CL2541.Contig2	comp27964_c0_seq1	0.604333	0.640815
	Unigene23018	270 1463 chloroplast malate dehydrogenase [Brassica rapa subsp. pekinensis]		11	950	0.735	*	-	Unigene23018	comp93467_c0_seq1	1.96157	0.356935
	CL11719.Contig2	31 1395 hypothetical protein ARALYDRAFT_471456 [Arabidopsis lyrata subsp. lyrata] >gi|297338567|gb|EFH68984.1| hypothetical protein ARALYDRAFT_471456 [Arabidopsis lyrata subsp. lyrata]		2	53	0.75			CL11719.Contig2	comp29490_c0_seq2	-1.26391	0.726169
	CL4884.Contig1	55 1413 plastid transcriptionally active 17 protein [Arabidopsis thaliana] >gi|48958493|gb|AAT47799.1| At1g80480 [Arabidopsis thaliana] >gi|51536562|gb|AAU05519.1| At1g80480 [Arabidopsis thaliana] >gi|332198289|gb|AEE36410.1| plastid transcriptio	CL4884.Contig2	3	44	0.988			CL4884.Contig1	comp20084_c0_seq2	-0.967351	0.467855
	CL10633.Contig1	220 2070 minus strand RecName: Full=Probable inactive receptor kinase At3g02880; Flags: Precursor >gi|13937228|gb|AAK50106.1|AF372969_1 AT3g02880/F13E7_17 [Arabidopsis thaliana] >gi|30102484|gb|AAP21160.1| At3g02880/F13E7_17 [Arabidopsis thalian		5	216	0.712			CL10633.Contig1	comp24251_c0_seq2	0.222918	0.916934
	CL11960.Contig1	304 1065 minus strand hypothetical protein ARALYDRAFT_475501 [Arabidopsis lyrata subsp. lyrata] >gi|297334138|gb|EFH64556.1| hypothetical protein ARALYDRAFT_475501 [Arabidopsis lyrata subsp. lyrata]	CL11960.Contig2	2	95	1.123			CL11960.Contig1	comp17101_c0_seq1	-0.20836	1
	CL3651.Contig1	189 650 minus strand NADH-ubiquinone oxidoreductase related-like protein [Brassica rapa]	CL3651.Contig2	4	209	0.868			CL3651.Contig1	comp117009_c0_seq1	-0.20836	1
	CL9875.Contig1	1 825 subtilase family protein [Arabidopsis lyrata subsp. lyrata] >gi|297330849|gb|EFH61268.1| subtilase family protein [Arabidopsis lyrata subsp. lyrata]		3	77	1.12			CL9875.Contig1	comp30279_c0_seq2	-0.414741	0.763112
	CL12477.Contig2	151 1101 annexin 1 [Brassica napus]		25	647	1.061			CL12477.Contig2	comp23426_c0_seq1	1.16755	0.184686
	CL251.Contig3	50 1054 minus strand photosystem II protein [Brassica oleracea]		4	287	1.004			CL251.Contig3	comp28460_c0_seq2	1.65514	0.443609
	CL74.Contig1	96 1862 ketol-acid reductoisomerase [Arabidopsis lyrata subsp. lyrata] >gi|297322308|gb|EFH52729.1| ketol-acid reductoisomerase [Arabidopsis lyrata subsp. lyrata]		6	140	1.363			CL74.Contig1	comp18434_c0_seq1	0.0811471	1
	Unigene27442	209 1714 hypothetical protein ARALYDRAFT_484077 [Arabidopsis lyrata subsp. lyrata] >gi|297322605|gb|EFH53026.1| hypothetical protein ARALYDRAFT_484077 [Arabidopsis lyrata subsp. lyrata]		2	109	0.76	*	-	Unigene27442	comp31814_c0_seq2	2.52499	0.00628507
	Unigene28919	136 1905 minus strand uncharacterized protein [Arabidopsis thaliana] >gi|332645044|gb|AEE78565.1| uncharacterized protein [Arabidopsis thaliana]		4	199	2.292			Unigene28919	comp27685_c0_seq7	-33.9211	9.18e-05	-
	CL4227.Contig1	178 2109 unnamed protein product [Thellungiella halophila]		11	358	1.314			CL4227.Contig1	comp31042_c0_seq1	-0.40394	0.810669
	CL8491.Contig1	208 1332 semialdehyde dehydrogenase-like protein [Arabidopsis thaliana] >gi|17979524|gb|AAL50097.1| At1g14810/F10B6_6 [Arabidopsis thaliana] >gi|20856224|gb|AAM26654.1| At1g14810/F10B6_6 [Arabidopsis thaliana] >gi|332191107|gb|AEE29228.1| semiald		3	756	1.004			CL8491.Contig1	comp30246_c0_seq2	0.0927084	1
	CL2115.Contig2	105 1202 minus strand pyridine nucleotide-disulfide oxidoreductase family protein [Arabidopsis lyrata subsp. lyrata] >gi|297323163|gb|EFH53584.1| pyridine nucleotide-disulfide oxidoreductase family protein [Arabidopsis lyrata subsp. lyrata]		4	132	0.67			CL2115.Contig2	comp28996_c0_seq4	-0.0480847	1
	CL4932.Contig1	2 892 hypothetical protein ARALYDRAFT_483863 [Arabidopsis lyrata subsp. lyrata] >gi|297326113|gb|EFH56533.1| hypothetical protein ARALYDRAFT_483863 [Arabidopsis lyrata subsp. lyrata]		13	311	0.638	*	-	CL4932.Contig1	comp27823_c0_seq4	32.5447	0.0102723
	Unigene15213	81 227 minus strand HSP20-like chaperone [Arabidopsis thaliana] >gi|332656774|gb|AEE82174.1| HSP20-like chaperone [Arabidopsis thaliana]		9	375	1.236	*	+	Unigene15213	comp27778_c0_seq7	-32.2967	0.0251893
	Unigene26419	1 396 60S ribosomal protein L6 [Arabidopsis lyrata subsp. lyrata] >gi|297338845|gb|EFH69262.1| 60S ribosomal protein L6 [Arabidopsis lyrata subsp. lyrata]		5	175	2.923	*	+	Unigene26419	comp29891_c1_seq2	1.15174	0.214078
	CL1485.Contig3	2 1396 kinase family protein [Arabidopsis lyrata subsp. lyrata] >gi|297325370|gb|EFH55790.1| kinase family protein [Arabidopsis lyrata subsp. lyrata]		5	152	0.995			CL1485.Contig3	comp31575_c0_seq2	-0.533824	0.644477
	CL11123.Contig1	72 404 RecName: Full=Cytochrome c >gi|51317000|sp|P62773.1|CYC_BRAOL RecName: Full=Cytochrome c >gi|229347|prf||711058A cytochrome c	CL11123.Contig2 Unigene14981	5	54	1.347			CL11123.Contig1	comp16421_c0_seq1	-32.0297	0.0347447
	CL3491.Contig3	210 1553 aspartyl protease family protein [Arabidopsis thaliana] >gi|332003717|gb|AED91100.1| aspartyl protease family protein [Arabidopsis thaliana]		117	4707	0.496			CL3491.Contig3	comp32454_c0_seq1	10.0988	4.84e-17	+
	CL3199.Contig2	2 739 minus strand unnamed protein product [Thellungiella halophila]		3	64	1.233			CL3199.Contig2	comp30455_c0_seq7	1.11155	1
	CL856.Contig2	386 1345 minus strand copper ion binding protein [Arabidopsis thaliana] >gi|332660689|gb|AEE86089.1| copper ion binding protein [Arabidopsis thaliana]	CL856.Contig5	4	365	0.888			CL856.Contig2	comp29493_c0_seq3	-1.65367	0.09084
	CL5039.Contig14	238 1548 minus strand hypothetical protein ARALYDRAFT_474000 [Arabidopsis lyrata subsp. lyrata] >gi|297339963|gb|EFH70380.1| hypothetical protein ARALYDRAFT_474000 [Arabidopsis lyrata subsp. lyrata]		2	117	0.921			CL5039.Contig14	comp21413_c0_seq2	-0.693786	0.948145
	CL7215.Contig1	165 1619 hypothetical protein ARALYDRAFT_487778 [Arabidopsis lyrata subsp. lyrata] >gi|297319248|gb|EFH49670.1| hypothetical protein ARALYDRAFT_487778 [Arabidopsis lyrata subsp. lyrata]		6	417	0.897			CL7215.Contig1	comp22599_c1_seq1	-4.01571	0.0299205
	CL5389.Contig2	173 2326 ATGCN4 [Arabidopsis lyrata subsp. lyrata] >gi|297322096|gb|EFH52517.1| ATGCN4 [Arabidopsis lyrata subsp. lyrata]		14	399	1.318			CL5389.Contig2	comp26604_c0_seq2	-33.5541	0.000381572	-
	Unigene16236	166 930 ATPDX2/EMB2407/PDX2 [Arabidopsis lyrata subsp. lyrata] >gi|297312219|gb|EFH42643.1| ATPDX2/EMB2407/PDX2 [Arabidopsis lyrata subsp. lyrata]		2	69	0.694			Unigene16236	comp22117_c0_seq1	-1.59024	0.0850971
	CL8917.Contig1	145 3717 uncharacterized protein [Arabidopsis thaliana] >gi|330253560|gb|AEC08654.1| uncharacterized protein [Arabidopsis thaliana]		31	1036	1.551	*	+	CL8917.Contig1	comp32015_c0_seq6	-1.63166	0.116021
	Unigene24853	64 1500 minus strand 2-oxoacid dehydrogenases acyltransferase family protein [Arabidopsis thaliana] >gi|5881963|gb|AAD55139.1|AF066079_1 dihydrolipoamide S-acetyltransferase [Arabidopsis thaliana] >gi|14335166|gb|AAK59863.1| AT3g25860/MPE11_1 [A		10	448	0.856			Unigene24853	comp27169_c0_seq1	0.247621	0.889098
	CL1804.Contig2	158 1285 minus strand ATPME2 [Arabidopsis lyrata subsp. lyrata] >gi|297337616|gb|EFH68033.1| ATPME2 [Arabidopsis lyrata subsp. lyrata]	CL1804.Contig3	2	193	0.413	*	-	CL1804.Contig2	comp21910_c0_seq1	2.45907	0.00777489
	CL6067.Contig1	188 1240 minus strand V-type proton ATPase subunit d2 [Arabidopsis thaliana] >gi|12585471|sp|Q9LHA4.1|VA0D2_ARATH RecName: Full=V-type proton ATPase subunit d2; Short=V-ATPase subunit d2; AltName: Full=Vacuolar H(+)-ATPase subunit d isoform 2; A		2	63	1.939			CL6067.Contig1	comp32189_c1_seq3	-0.528906	0.903577
	CL7414.Contig1	22 987 minus strand RecName: Full=Endochitinase CH25; Flags: Precursor >gi|167130|gb|AAA32986.1| endochitinase [Brassica napus]		30	938	0.755			CL7414.Contig1	comp34481_c0_seq1	-3.08959	0.00198832
	Unigene22344	2 916 senescence-associated cysteine protease [Brassica oleracea]		17	585	0.785	*	-	Unigene22344	comp26987_c0_seq4	32.6773	0.00777489
	CL4700.Contig1	51 1838 hypothetical protein [Arabidopsis thaliana]		4	146	1.384	*	+	CL4700.Contig1	comp61753_c0_seq1	2.11357	0.0866896
	CL6883.Contig1	50 1243 minus strand hypothetical protein ARALYDRAFT_904132 [Arabidopsis lyrata subsp. lyrata] >gi|297326094|gb|EFH56514.1| hypothetical protein ARALYDRAFT_904132 [Arabidopsis lyrata subsp. lyrata]	CL6883.Contig2	22	337	1.008			CL6883.Contig1	comp1466_c0_seq1	0.42907	0.924099
	CL5162.Contig5	2 217 los [Brassica rapa subsp. chinensis]		11	376	0.943			CL5162.Contig5	comp15170_c1_seq1	1.01403	0.650873
	CL599.Contig1	98 2194 minus strand VHS domain-containing protein [Arabidopsis thaliana] >gi|75168952|sp|Q9C5H4.1|Y3627_ARATH RecName: Full=VHS domain-containing protein At3g16270 >gi|332642271|gb|AEE75792.1| VHS domain-containing protein [Arabidopsis thaliana	CL599.Contig2	3	117	1.149	*		CL599.Contig1	comp30596_c1_seq4	-34.8482	1.52e-06	-
	Unigene21004	5 1141 unnamed protein product [Thellungiella halophila]		29	915	0.548	*	-	Unigene21004	comp22828_c0_seq1	1.18105	0.203775
	CL10499.Contig1	31 1632 minus strand glucan endo-1,3-beta-glucosidase 4 [Arabidopsis thaliana] >gi|42572413|ref|NP_974302.1| glucan endo-1,3-beta-glucosidase 4 [Arabidopsis thaliana] >gi|42572415|ref|NP_974303.1| glucan endo-1,3-beta-glucosidase 4 [Arabidopsis	CL10499.Contig2	5	153	0.441	*	-	CL10499.Contig1	comp25062_c0_seq1	1.4064	0.13109
	CL519.Contig1	52 1545 unnamed protein product [Thellungiella halophila]	CL519.Contig2	2	122	2.251	*	+	CL519.Contig1	comp27673_c0_seq1	-1.53396	0.175293
	CL12834.Contig1	112 1227 minus strand homoserine kinase [Arabidopsis lyrata subsp. lyrata] >gi|297329886|gb|EFH60305.1| homoserine kinase [Arabidopsis lyrata subsp. lyrata]		4	244	0.57			CL12834.Contig1	comp30379_c4_seq1	1.79164	0.205076
	Unigene23987	2 259 hypothetical protein ARALYDRAFT_478805 [Arabidopsis lyrata subsp. lyrata] >gi|297330842|gb|EFH61261.1| hypothetical protein ARALYDRAFT_478805 [Arabidopsis lyrata subsp. lyrata]		3	96	0.981			Unigene23987	comp25358_c0_seq2	-1.11759	0.258074
	Unigene423	314 1483 minus strand unnamed protein product [Thellungiella halophila]		3	86	1.179			Unigene423	comp31299_c0_seq1	31.9368	0.0489753
	CL11139.Contig1	3 1592 minus strand glucose-6-phosphate 1-dehydrogenase [Arabidopsis thaliana]		3	133	1.228			CL11139.Contig1	comp30997_c0_seq2	-1.22221	0.217674
	Unigene19595	155 715 adenine nucleotide alpha hydrolases-like protein [Arabidopsis thaliana] >gi|20198098|gb|AAD23643.2| expressed protein [Arabidopsis thaliana] >gi|21592708|gb|AAM64657.1| RD2 protein [Arabidopsis thaliana] >gi|330252109|gb|AEC07203.1| adeni		12	325	0.725	*	-	Unigene19595	comp32358_c0_seq1	-1.62914	0.0537734
	CL13488.Contig1	412 1119 minus strand Monocopper oxidase-like protein SKS1 OS=Arabidopsis thaliana GN=SKS1 PE=1 SV=1	CL13488.Contig2	4	106	0.717			CL13488.Contig1	comp30191_c1_seq1	0.822667	0.506456
	Unigene20457	229 1038 hypothetical protein ARALYDRAFT_489055 [Arabidopsis lyrata subsp. lyrata] >gi|297319880|gb|EFH50302.1| hypothetical protein ARALYDRAFT_489055 [Arabidopsis lyrata subsp. lyrata]		4	140	0.763			Unigene20457	comp29776_c0_seq1	-0.26843	0.901859
	CL5448.Contig1	114 803 2-oxoglutarate dehydrogenase E2 subunit [Arabidopsis thaliana]	CL5448.Contig5	5	191	1.59			CL5448.Contig1	comp19241_c2_seq1	-2.79332	0.353433
	CL4859.Contig1	60 908 minus strand putative lactoylglutathione lyase [Brassica rapa]		27	453	1.256	*	+	CL4859.Contig1	comp85809_c0_seq1	-0.945325	0.690501
	CL9461.Contig1	1 809 LEN=1013; minus strand; translated		7	166	0.655			CL9461.Contig1	comp25772_c0_seq3	31.309	0.139691
	Unigene8134	83 2845 minus strand hypothetical protein ARALYDRAFT_919683 [Arabidopsis lyrata subsp. lyrata] >gi|297310706|gb|EFH41130.1| hypothetical protein ARALYDRAFT_919683 [Arabidopsis lyrata subsp. lyrata]		10	130	1.164			Unigene8134	comp33503_c0_seq1	-0.128758	0.965621
	CL8334.Contig2	54 1550 alpha-L-fucosidase 1 [Arabidopsis lyrata subsp. lyrata] >gi|297326792|gb|EFH57212.1| alpha-L-fucosidase 1 [Arabidopsis lyrata subsp. lyrata]		3	43	1.037			CL8334.Contig2	comp30019_c0_seq1	0.590501	0.632176
	CL8685.Contig3	79 1416 minus strand early-responsive to dehydration 7 [Arabidopsis lyrata subsp. lyrata] >gi|297331970|gb|EFH62389.1| early-responsive to dehydration 7 [Arabidopsis lyrata subsp. lyrata]		2	312	0.877			CL8685.Contig3	comp31290_c0_seq8	-2.86652	0.00332764
	Unigene27153	388 648 minus strand carbamoyl phosphate synthetase B [Arabidopsis thaliana] >gi|9972356|gb|AAG10606.1|AC008030_6 carbamoyl phosphate synthetase large chain (carB) [Arabidopsis thaliana] >gi|14194125|gb|AAK56257.1|AF367268_1 At1g29900/F1N18_6 [A		3	103	1.985			Unigene27153	comp14180_c0_seq1	0.318887	0.82492
	Unigene1773	158 1213 minus strand hypothetical protein ARALYDRAFT_490506 [Arabidopsis lyrata subsp. lyrata] >gi|297318773|gb|EFH49195.1| hypothetical protein ARALYDRAFT_490506 [Arabidopsis lyrata subsp. lyrata]		2	95	0.72			Unigene1773	comp31456_c0_seq1	-0.20836	1
	CL13184.Contig1	94 744 hypothetical protein ARALYDRAFT_329973 [Arabidopsis lyrata subsp. lyrata] >gi|297316077|gb|EFH46500.1| hypothetical protein ARALYDRAFT_329973 [Arabidopsis lyrata subsp. lyrata]	CL13184.Contig2	6	81	0.847			CL13184.Contig1	comp29017_c0_seq1	32.7872	0.00455443
	Unigene28479	307 1134 unknown [Brassica rapa]		21	921	0.665	*	-	Unigene28479	comp20144_c0_seq1	-0.636626	0.558851
	CL5139.Contig2	3 779 minus strand tropinone reductase-like protein [Arabidopsis cebennensis]		5	248	0.725			CL5139.Contig2	comp19629_c0_seq1	-31.6316	0.0974087
	CL6005.Contig2	31 738 minus strand DAG protein, putative [Arabidopsis thaliana]	CL6005.Contig3	2	117	0.674			CL6005.Contig2	comp29880_c0_seq4	1.09649	0.259752
	Unigene26566	2 2584 predicted protein [Arabidopsis lyrata subsp. lyrata] >gi|297309842|gb|EFH40266.1| predicted protein [Arabidopsis lyrata subsp. lyrata]		5	236	0.669	*	-	Unigene26566	comp31406_c0_seq20	-0.729698	0.551325
	CL11486.Contig1	260 1435 threonine aldolase 2 [Arabidopsis thaliana] >gi|11762214|gb|AAG40385.1|AF325033_1 AT3g04520 [Arabidopsis thaliana] >gi|51968832|dbj|BAD43108.1| L-allo-threonine aldolase like protein [Arabidopsis thaliana] >gi|332640570|gb|AEE74091.1| th	CL11486.Contig2 Unigene18794 Unigene18795	5	325	0.908			CL11486.Contig1	comp25144_c0_seq9	-1.07646	0.504981
	CL3085.Contig2	3 668 EF-hand, calcium binding motif-containing protein [Arabidopsis thaliana] >gi|332003942|gb|AED91325.1| EF-hand, calcium binding motif-containing protein [Arabidopsis thaliana]		5	126	1.323			CL3085.Contig2	comp31750_c0_seq4	31.2363	0.139691
	Unigene1099	3 338 hypothetical protein ARALYDRAFT_488439 [Arabidopsis lyrata subsp. lyrata] >gi|297317527|gb|EFH47949.1| hypothetical protein ARALYDRAFT_488439 [Arabidopsis lyrata subsp. lyrata]		4	144	0.456	*	-	Unigene1099	comp21663_c0_seq1	1.07175	0.544992
	CL1960.Contig2	181 1743 minus strand unnamed protein product [Thellungiella halophila]	CL1960.Contig6 CL1960.Contig9	4	1048	1.092			CL1960.Contig2	comp30352_c0_seq5	-2.36411	0.0221295
	Unigene26226	95 934 minus strand glutamine synthetase [Raphanus sativus]		15	445	1.052			Unigene26226	comp50567_c0_seq1	-0.71086	0.690501
	CL11306.Contig2	53 619 minus strand hypothetical protein ARALYDRAFT_480392 [Arabidopsis lyrata subsp. lyrata] >gi|297329726|gb|EFH60145.1| hypothetical protein ARALYDRAFT_480392 [Arabidopsis lyrata subsp. lyrata]		2	69	0.731			CL11306.Contig2	comp12441_c0_seq1	0.22774	0.93893
	CL11696.Contig1	1 1131 minus strand RING/FYVE/PHD zinc finger-containing protein [Arabidopsis thaliana] >gi|13605833|gb|AAK32902.1|AF367315_1 At1g20110/T20H2_10 [Arabidopsis thaliana] >gi|16226228|gb|AAL16109.1|AF428277_1 At1g20110/T20H2_10 [Arabidopsis thalian	CL11696.Contig2	8	218	0.784			CL11696.Contig1	comp31056_c0_seq1	32.2447	0.0251893
	Unigene24651	244 1230 transducin family protein [Arabidopsis lyrata subsp. lyrata] >gi|297337554|gb|EFH67971.1| transducin family protein [Arabidopsis lyrata subsp. lyrata]		5	158	1.028			Unigene24651	comp31135_c0_seq6	0.196386	1
	CL1605.Contig2	65 559 minus strand hypothetical protein ARALYDRAFT_491553 [Arabidopsis lyrata subsp. lyrata] >gi|297315146|gb|EFH45569.1| hypothetical protein ARALYDRAFT_491553 [Arabidopsis lyrata subsp. lyrata]		6	143	1.456	*	+	CL1605.Contig2	comp24022_c0_seq1	5.66201	1.34e-06	+
	CL2279.Contig2	2 796 60S ribosomal protein L3-2 [Arabidopsis thaliana] >gi|21542436|sp|P22738.4|RL32_ARATH RecName: Full=60S ribosomal protein L3-2 >gi|4585874|gb|AAD25547.1|AC005850_4 60s ribosomal protein L3 [Arabidopsis thaliana] >gi|332195738|gb|AEE33859.1|		6	102	1.918			CL2279.Contig2	comp23472_c0_seq1	-34.5036	8.07e-06	-
	CL3399.Contig1	4 1785 minus strand Similar to gb|AJ005073 Alix (ALG-2-interacting protein X) from Mus musculus. ESTs gb|R90133, gb|Z17944 and gb|AA605465 come from this gene [Arabidopsis thaliana]		3	123	0.82			CL3399.Contig1	comp31623_c0_seq2	-0.661743	0.533739
	CL9855.Contig1	59 925 minus strand Chain A, Structure Of Glyoxylate Reductase 1 From Arabidopsis (Atglyr1)		7	273	0.99			CL9855.Contig1	comp24916_c0_seq1	0.79164	0.821569
	CL11256.Contig1	1 1047 AT2G38280 [Arabidopsis thaliana]	CL11256.Contig2	2	47	1.344			CL11256.Contig1	comp32150_c0_seq2	-2.027	0.0282985
	CL8114.Contig2	144 482 minus strand hypothetical protein ARALYDRAFT_311324 [Arabidopsis lyrata subsp. lyrata] >gi|297335226|gb|EFH65643.1| hypothetical protein ARALYDRAFT_311324 [Arabidopsis lyrata subsp. lyrata]	Unigene25145	4	141	1.85	*	+	CL8114.Contig2	comp45662_c0_seq1	-0.0277873	1
	Unigene8836	2 187 minus strand metallothionein-like protein [Brassica rapa]		3	128	1.179			Unigene8836	comp20527_c0_seq1	4.97241	1.7e-08	+
	CL7319.Contig1	50 679 hypothetical protein ARALYDRAFT_487051 [Arabidopsis lyrata subsp. lyrata] >gi|297318902|gb|EFH49324.1| hypothetical protein ARALYDRAFT_487051 [Arabidopsis lyrata subsp. lyrata]		5	153	1.011			CL7319.Contig1	comp24450_c0_seq2	-0.378285	0.889098
	CL8291.Contig4	3 992 lipase SIL1 [Brassica rapa subsp. pekinensis]		5	93	1.149			CL8291.Contig4	comp19151_c0_seq1	-5.66779	0.000101062	-
	CL5175.Contig1	121 1047 RNA recognition motif (RRM)-containing protein [Brassica oleracea]		2	109	0.855			CL5175.Contig1	comp11384_c0_seq1	1.49566	0.0974087
	CL1059.Contig1	152 2128 minus strand UDP-glucose 4,6-dehydratase [Arabidopsis thaliana] >gi|62901052|sp|Q9LH76.1|RHM3_ARATH RecName: Full=Probable rhamnose biosynthetic enzyme 3 >gi|19310443|gb|AAL84958.1| AT3g14790/T21E2_4 [Arabidopsis thaliana] >gi|22655464|		4	86	1.05			CL1059.Contig1	comp29051_c0_seq3	-0.381743	0.77343
	Unigene21307	80 1255 minus strand N-acetyl-gamma-glutamyl-phosphate reductase [Arabidopsis thaliana] >gi|240254483|ref|NP_849993.4| N-acetyl-gamma-glutamyl-phosphate reductase [Arabidopsis thaliana] >gi|334184607|ref|NP_180668.5| alpha/beta-hydrolase domain-		5	173	0.8			Unigene21307	comp27372_c0_seq2	34.0368	5.71e-05	+
	CL11352.Contig3	98 640 minus strand RecName: Full=Thioredoxin M-type, chloroplastic; Short=Trx-M; Flags: Precursor >gi|1943720|gb|AAB52409.1| thioredoxin-m [Brassica napus] >gi|5566283|gb|AAD45358.1| thioredoxin-m precursor [Brassica napus]		3	76	0.633			CL11352.Contig3	comp38054_c0_seq1	0.756875	0.587457
	CL2306.Contig4	48 1052 minus strand phosphoenolpyruvate carboxylase-like protein [Arabidopsis thaliana] >gi|63003786|gb|AAY25422.1| At1g21440 [Arabidopsis thaliana] >gi|66841372|gb|AAY57323.1| At1g21440 [Arabidopsis thaliana] >gi|332191981|gb|AEE30102.1| phosp	Unigene2800	2	80	0.848			CL2306.Contig4	comp15414_c0_seq1	0.0140329	1
	CL9806.Contig1	69 584 RecName: Full=Probable calcium-binding protein CML27; AltName: Full=Calmodulin-like protein 27 >gi|8671778|gb|AAF78384.1|AC069551_17 T10O22.19 [Arabidopsis thaliana] >gi|9719735|gb|AAF97837.1|AC034107_20 Strong similarity to calcium-bindin		8	276	0.993			CL9806.Contig1	comp21043_c0_seq1	1.18823	0.182511
	Unigene20036	144 641 hypothetical protein ARALYDRAFT_479859 [Arabidopsis lyrata subsp. lyrata] >gi|297331407|gb|EFH61826.1| hypothetical protein ARALYDRAFT_479859 [Arabidopsis lyrata subsp. lyrata]		7	411	0.47	*	-	Unigene20036	comp25619_c0_seq1	-1.68059	0.0489753
	CL9031.Contig2	126 623 minus strand hypothetical protein ARALYDRAFT_312752 [Arabidopsis lyrata subsp. lyrata] >gi|297338814|gb|EFH69231.1| hypothetical protein ARALYDRAFT_312752 [Arabidopsis lyrata subsp. lyrata]		3	218	1.047			CL9031.Contig2	comp30650_c1_seq1	0.495988	0.678209
	Unigene8306	81 1586 minus strand RNA recognition motif-containing protein [Arabidopsis lyrata subsp. lyrata] >gi|297317548|gb|EFH47970.1| RNA recognition motif-containing protein [Arabidopsis lyrata subsp. lyrata]		5	133	1.227			Unigene8306	comp34920_c0_seq1	0.30498	0.852408
	CL736.Contig2	1 1224 minus strand heat shock protein 81-4 [Brassica rapa]		3	451	2.261	*	+	CL736.Contig2	comp23308_c0_seq1	0.0956466	1
	CL12564.Contig1	2 2143 minus strand ubiquitin-specific protease 14 [Arabidopsis lyrata subsp. lyrata] >gi|297331230|gb|EFH61649.1| ubiquitin-specific protease 14 [Arabidopsis lyrata subsp. lyrata]		4	126	1.182			CL12564.Contig1	comp25961_c0_seq2	-0.206497	0.968496
	Unigene23945	1 267 minus strand GDSL-motif lipase/hydrolase family protein [Arabidopsis lyrata subsp. lyrata] >gi|297317457|gb|EFH47879.1| GDSL-motif lipase/hydrolase family protein [Arabidopsis lyrata subsp. lyrata]		6	223	0.683			Unigene23945	comp12937_c0_seq1	0.702373	0.587457
	CL6905.Contig1	1 2334 transducin/WD40 domain-containing protein [Arabidopsis thaliana] >gi|332005968|gb|AED93351.1| transducin/WD40 domain-containing protein [Arabidopsis thaliana]		2	57	0.441			CL6905.Contig1	comp22844_c0_seq1	1.96157	0.356935
	CL3061.Contig2	22 708 minus strand nucleotide-sensitive chloride conductance regulator family protein [Arabidopsis thaliana] >gi|75180626|sp|Q9LVA7.1|ICLN_ARATH RecName: Full=Chloride conductance regulatory protein ICln; Short=I(Cln); AltName: Full=Chloride io	CL3061.Contig3	2	100	0.386			CL3061.Contig2	comp24303_c0_seq3	0.104306	1
	Unigene21274	76 975 soluble inorganic pyrophosphatase 1 [Arabidopsis thaliana] >gi|75264322|sp|Q9LXC9.1|IPYR1_ARATH RecName: Full=Soluble inorganic pyrophosphatase 1, chloroplastic; AltName: Full=Inorganic pyrophosphatase 1; AltName: Full=Pyrophosphate phosph		2	58	1.184			Unigene21274	comp28941_c1_seq1	0.00939396	1
	CL3925.Contig1	62 223 minus strand translocase of chloroplast 132 [Arabidopsis thaliana] >gi|75206664|sp|Q9SLF3.1|TC132_ARATH RecName: Full=Translocase of chloroplast 132, chloroplastic; Short=AtToc132; AltName: Full=132 kDa chloroplast outer envelope protein		2	141	0.812			CL3925.Contig1	comp31689_c0_seq3	-33.7276	0.000216757	-
	Unigene23305	3 941 minus strand protease Do-like 8 [Arabidopsis thaliana] >gi|18203244|sp|Q9LU10.1|DEGP8_ARATH RecName: Full=Protease Do-like 8, chloroplastic; Flags: Precursor >gi|15912207|gb|AAL08237.1| AT5g39830/K13H13_10 [Arabidopsis thaliana] >gi|196992		2	91	0.965			Unigene23305	comp31132_c0_seq1	-0.803518	0.431184
	CL1707.Contig1	99 1418 minus strand hypothetical protein ARALYDRAFT_482234 [Arabidopsis lyrata subsp. lyrata] >gi|297327091|gb|EFH57511.1| hypothetical protein ARALYDRAFT_482234 [Arabidopsis lyrata subsp. lyrata]		11	249	1.339	*	+	CL1707.Contig1	comp25054_c0_seq1	0.319572	0.852216
	CL2803.Contig8	20 1045 minus strand polygalacturonase inhibitor protein [Brassica napus] >gi|22256018|gb|AAM94868.1| polygalacturonase inhibitor protein [Brassica napus] >gi|160693700|gb|ABX46548.1| polygalacturonase inhibitor protein 1 [Brassica napus]		17	712	0.739			CL2803.Contig8	comp31186_c0_seq1	-0.131602	0.969053
	CL217.Contig2	1 666 minus strand hexokinase [Brassica oleracea]		4	119	1.438			CL217.Contig2	comp29447_c0_seq1	1.93525	0.0706467
	Unigene8469	5 1093 transducin family protein [Arabidopsis lyrata subsp. lyrata] >gi|297315850|gb|EFH46273.1| transducin family protein [Arabidopsis lyrata subsp. lyrata]		4	171	0.706			Unigene8469	comp25545_c3_seq1	6.07704	5.66e-06	+
	CL10159.Contig1	123 1778 minus strand EMB2221 [Arabidopsis lyrata subsp. lyrata] >gi|297324356|gb|EFH54777.1| EMB2221 [Arabidopsis lyrata subsp. lyrata]		4	124	0.758			CL10159.Contig1	comp29937_c0_seq4	-0.893486	0.390103
	Unigene27340	82 1791 acyl-activating enzyme 7 [Arabidopsis thaliana] >gi|75304477|sp|Q8VZF1.1|AEE7_ARATH RecName: Full=Acetate/butyrate--CoA ligase AAE7, peroxisomal; AltName: Full=AMP-binding protein 7; Short=AtAMPBP7; AltName: Full=Acetyl-CoA synthetase; Al		4	106	1.987	*	+	Unigene27340	comp26768_c1_seq10	3.35089	0.00126533
	CL8525.Contig1	148 648 uncharacterized protein [Arabidopsis thaliana] >gi|332660748|gb|AEE86148.1| uncharacterized protein [Arabidopsis thaliana]	CL8525.Contig2 CL8525.Contig3 Unigene24761	3	140	1.011			CL8525.Contig1	comp25714_c0_seq1	-0.598306	0.618112
	CL8614.Contig1	77 844 minus strand 60S ribosomal protein L7A [Arabidopsis lyrata subsp. lyrata] >gi|297326154|gb|EFH56574.1| 60S ribosomal protein L7A [Arabidopsis lyrata subsp. lyrata]	CL8614.Contig2 CL8614.Contig6	11	197	2.818	*	+	CL8614.Contig1	comp30100_c0_seq4	0.550632	0.65788
	CL7676.Contig1	139 1587 minus strand ATP-sulfurylase precursor [Brassica oleracea]	CL7676.Contig2 CL7676.Contig3	3	98	0.922			CL7676.Contig1	comp30498_c0_seq3	-1.7372	0.478904
	CL12435.Contig1	145 2217 glycyl-tRNA synthetase 1 [Arabidopsis thaliana] >gi|3334349|sp|O23627.1|SYGM1_ARATH RecName: Full=Glycine--tRNA ligase 1, mitochondrial; AltName: Full=Diadenosine tetraphosphate synthetase; Short=AP-4-A synthetase; AltName: Full=Glycyl-t		9	206	1.077			CL12435.Contig1	comp31987_c1_seq1	0.335497	0.821569
	CL3723.Contig2	205 753 minus strand unknown [Eutrema parvulum]		8	1467	1.057			CL3723.Contig2	comp29032_c0_seq33	-1.16838	0.348862
	Unigene20482	2 1048 minus strand dihydrolipoyllysine-residue acetyltransferase component 1 of pyruvate dehydrogenase complex [Arabidopsis thaliana] >gi|332645392|gb|AEE78913.1| dihydrolipoyllysine-residue acetyltransferase component 1 of pyruvate dehydrogena		4	84	1.353			Unigene20482	comp12633_c0_seq1	-0.387163	0.779136
	CL5706.Contig3	142 540 minus strand Transketolase, chloroplastic OS=Solanum tuberosum PE=2 SV=1	CL5706.Contig4	4	280	1.727	*	+	CL5706.Contig3	comp29263_c0_seq1	-1.60342	0.139691
	CL119.Contig3	38 1453 minus strand polygalacturonase [Arabidopsis thaliana] >gi|75306312|sp|Q949Z1.1|PGLR4_ARATH RecName: Full=Polygalacturonase At1g48100; Short=PG; AltName: Full=Pectinase At1g48100; Flags: Precursor >gi|332194127|gb|AEE32248.1| polygalactur	CL119.Contig4 CL119.Contig7	3	112	0.684			CL119.Contig3	comp788_c0_seq1	-32.7666	0.00591794
	Unigene28	936 1454 minus strand regulatory particle triple-A 1A [Arabidopsis thaliana] >gi|297853156|ref|XP_002894459.1| regulatory particle triple-a 1A [Arabidopsis lyrata subsp. lyrata] >gi|28558169|sp|Q9SSB5.1|PRS7A_ARATH RecName: Full=26S protease reg		3	106	0.601			Unigene28	comp31878_c0_seq4	1.81305	0.0983322
	Unigene19996	132 428 minus strand beta-ketoacyl-ACP synthetase 1 [Brassica napus]		2	101	0.615			Unigene19996	comp31158_c0_seq1	0.365156	0.852408
	Unigene19962	44 529 minus strand single-strand DNA-binding protein [Arabidopsis thaliana] >gi|332642598|gb|AEE76119.1| single-strand DNA-binding protein [Arabidopsis thaliana]		4	124	0.465	*	-	Unigene19962	comp21148_c0_seq2	0.216328	1
	Unigene22399	1 627 initiation factor 3g [Arabidopsis thaliana]		6	107	1.038			Unigene22399	comp22927_c0_seq1	-0.243902	0.889098
	CL4067.Contig1	1499 3010 minus strand hydroxyproline-rich glycoprotein family protein [Arabidopsis thaliana] >gi|332198171|gb|AEE36292.1| hydroxyproline-rich glycoprotein family protein [Arabidopsis thaliana]		2	79	0.869			CL4067.Contig1	comp14037_c0_seq1	-0.0436562	1
	CL13358.Contig1	2 886 minus strand phospholipase C/ phosphoric diester hydrolase [Arabidopsis thaliana] >gi|332661322|gb|AEE86722.1| phospholipase C/ phosphoric diester hydrolase [Arabidopsis thaliana]		2	50	0.996			CL13358.Contig1	comp22915_c0_seq1	1.80253	0.050521
	CL5547.Contig1	91 1452 hypothetical protein ARALYDRAFT_474773 [Arabidopsis lyrata subsp. lyrata] >gi|297337773|gb|EFH68190.1| hypothetical protein ARALYDRAFT_474773 [Arabidopsis lyrata subsp. lyrata]		2	103	1.041			CL5547.Contig1	comp28751_c0_seq1	0.506019	0.683106
	CL366.Contig1	110 1753 minus strand gamma-glutamylcysteine synthetase [Brassica napus]	CL366.Contig2	4	162	1.715			CL366.Contig1	comp27353_c0_seq2	-0.722487	0.474125
	CL2018.Contig3	53 1213 hypothetical protein ARALYDRAFT_492356 [Arabidopsis lyrata subsp. lyrata] >gi|297313478|gb|EFH43901.1| hypothetical protein ARALYDRAFT_492356 [Arabidopsis lyrata subsp. lyrata]	CL2018.Contig4	5	158	2	*	+	CL2018.Contig3	comp29741_c0_seq4	0.301494	0.872417
	CL10366.Contig1	2 1633 long chain acyl-CoA synthetase [Brassica napus]		5	129	1.755	*	+	CL10366.Contig1	comp29933_c0_seq1	1.01276	0.259604
	Unigene13886	24 1799 minus strand hypothetical protein ARALYDRAFT_476389 [Arabidopsis lyrata subsp. lyrata] >gi|297334724|gb|EFH65142.1| hypothetical protein ARALYDRAFT_476389 [Arabidopsis lyrata subsp. lyrata]		3	90	1.947			Unigene13886	comp13280_c0_seq1	0.111937	0.979393
	CL3166.Contig1	255 944 minus strand V-type proton ATPase subunit E1 [Arabidopsis thaliana] >gi|12643432|sp|Q39258.2|VATE1_ARATH RecName: Full=V-type proton ATPase subunit E1; Short=V-ATPase subunit E1; AltName: Full=Protein EMBRYO DEFECTIVE 2448; AltName: Full	CL3166.Contig2 CL3166.Contig3	3	174	1.555			CL3166.Contig1	comp30043_c4_seq1	0.203149	0.918091
	Unigene15545	242 931 minus strand kinase family protein [Arabidopsis lyrata subsp. lyrata] >gi|297331295|gb|EFH61714.1| kinase family protein [Arabidopsis lyrata subsp. lyrata]		3	41	1.109			Unigene15545	comp26579_c0_seq1	-2.19415	0.0112748
	CL996.Contig3	139 1497 minus strand hypothetical protein ARALYDRAFT_485970 [Arabidopsis lyrata subsp. lyrata] >gi|297323871|gb|EFH54292.1| hypothetical protein ARALYDRAFT_485970 [Arabidopsis lyrata subsp. lyrata]		5	145	0.718			CL996.Contig3	comp31501_c0_seq1	1.78375	0.036238
	Unigene22828	2 343 minus strand hypothetical protein ARALYDRAFT_908346 [Arabidopsis lyrata subsp. lyrata] >gi|297316940|gb|EFH47362.1| hypothetical protein ARALYDRAFT_908346 [Arabidopsis lyrata subsp. lyrata]		3	87	1.114	*		Unigene22828	comp68599_c0_seq1	31.8213	0.0686039
	CL279.Contig5	245 1684 hypothetical protein ARALYDRAFT_488394 [Arabidopsis lyrata subsp. lyrata] >gi|297319565|gb|EFH49987.1| hypothetical protein ARALYDRAFT_488394 [Arabidopsis lyrata subsp. lyrata]		5	258	1.225			CL279.Contig5	comp29804_c2_seq12	2.57824	0.0112088
	CL12925.Contig1	280 1539 minus strand glucan endo-1,3-beta-glucosidase 10 [Arabidopsis thaliana] >gi|332007385|gb|AED94768.1| glucan endo-1,3-beta-glucosidase 10 [Arabidopsis thaliana]	CL12925.Contig2 CL12925.Contig3 CL12925.Contig4	8	253	0.822			CL12925.Contig1	comp17181_c0_seq1	0.79164	0.821569
	CL1368.Contig3	55 378 60S ribosomal protein L6 [Arabidopsis lyrata subsp. lyrata] >gi|297338845|gb|EFH69262.1| 60S ribosomal protein L6 [Arabidopsis lyrata subsp. lyrata]		2	110	4.077			CL1368.Contig3	comp29891_c1_seq1	1.09255	0.257553
	Unigene116	82 1749 minus strand ATABC1 [Arabidopsis lyrata subsp. lyrata] >gi|297320651|gb|EFH51073.1| ATABC1 [Arabidopsis lyrata subsp. lyrata]		3	80	1.149			Unigene116	comp30111_c0_seq1	-0.076466	1
	Unigene2229	60 1268 regulatory particle triple-A ATPase 3 [Arabidopsis thaliana] >gi|28558168|sp|Q9SEI4.1|PRS6B_ARATH RecName: Full=26S protease regulatory subunit 6B homolog; AltName: Full=26S protease subunit 6B homolog; AltName: Full=26S proteasome AAA-AT		5	243	1.335			Unigene2229	comp31736_c0_seq2	-0.0975569	0.99317
	CL3219.Contig2	139 966 minus strand hypothetical protein ARALYDRAFT_477400 [Arabidopsis lyrata subsp. lyrata] >gi|297330126|gb|EFH60545.1| hypothetical protein ARALYDRAFT_477400 [Arabidopsis lyrata subsp. lyrata]		35	1102	0.412	*	-	CL3219.Contig2	comp21467_c0_seq1	343000	1
	CL961.Contig3	100 393 minus strand unnamed protein product [Thellungiella halophila]		4	148	0.961			CL961.Contig3	comp81937_c0_seq1	-0.20836	1
	CL12091.Contig1	3 779 minus strand hypothetical protein ARALYDRAFT_897760 [Arabidopsis lyrata subsp. lyrata] >gi|297328742|gb|EFH59161.1| hypothetical protein ARALYDRAFT_897760 [Arabidopsis lyrata subsp. lyrata]		2	126	0.809			CL12091.Contig1	comp26848_c0_seq2	2.42865	0.012849
	CL2452.Contig2	208 1740 minus strand unnamed protein product [Thellungiella halophila]		4	107	1.029			CL2452.Contig2	comp30101_c0_seq2	-35.2686	1.97e-07	-
	Unigene18901	118 720 cyclophilin [Arabidopsis lyrata subsp. lyrata] >gi|297326916|gb|EFH57336.1| cyclophilin [Arabidopsis lyrata subsp. lyrata]		15	218	0.991			Unigene18901	comp24930_c0_seq1	-0.411553	0.745779
	CL13608.Contig2	389 1621 minus strand calcium-binding EF hand family protein [Arabidopsis lyrata subsp. lyrata] >gi|297336290|gb|EFH66707.1| calcium-binding EF hand family protein [Arabidopsis lyrata subsp. lyrata]		6	173	1.367			CL13608.Contig2	comp30511_c0_seq4	-1.35131	0.141495
	CL2657.Contig1	549 1022 minus strand lipid-associated family protein [Arabidopsis lyrata subsp. lyrata] >gi|297326271|gb|EFH56691.1| lipid-associated family protein [Arabidopsis lyrata subsp. lyrata]		19	502	0.475	*	-	CL2657.Contig1	comp33343_c0_seq1	1.22188	0.197745
	Unigene22436	2 343 beta-fructofuranosidase 5 [Arabidopsis lyrata subsp. lyrata] >gi|297337654|gb|EFH68071.1| beta-fructofuranosidase 5 [Arabidopsis lyrata subsp. lyrata]		2	79	0.726	*	-	Unigene22436	comp25428_c1_seq1	1.599	0.461399
	CL11170.Contig3	94 630 minus strand hypothetical protein ARALYDRAFT_493781 [Arabidopsis lyrata subsp. lyrata] >gi|297314402|gb|EFH44825.1| hypothetical protein ARALYDRAFT_493781 [Arabidopsis lyrata subsp. lyrata]		2	283	1.023			CL11170.Contig3	comp29607_c0_seq2	0.0513792	1
	CL5126.Contig2	362 1087 minus strand 60S ribosomal protein L7 [Arabidopsis lyrata subsp. lyrata] >gi|297322576|gb|EFH52997.1| 60S ribosomal protein L7 [Arabidopsis lyrata subsp. lyrata]	CL5126.Contig3	11	292	2.232	*	+	CL5126.Contig2	comp28422_c1_seq1	0.79164	0.889098
	Unigene7503	158 634 peptidyl-prolyl cis-trans isomerase cyclophilin-type family protein [Arabidopsis lyrata subsp. lyrata] >gi|297337878|gb|EFH68295.1| peptidyl-prolyl cis-trans isomerase cyclophilin-type family protein [Arabidopsis lyrata subsp. lyrata]		7	165	0.563	*	-	Unigene7503	comp34664_c0_seq1	0.344181	0.832141
	CL4057.Contig1	150 1055 hypothetical protein ARALYDRAFT_916328 [Arabidopsis lyrata subsp. lyrata] >gi|297316600|gb|EFH47023.1| hypothetical protein ARALYDRAFT_916328 [Arabidopsis lyrata subsp. lyrata]		12	340	1.536	*	+	CL4057.Contig1	comp29991_c0_seq4	33.9966	6.67e-05	+
	CL8830.Contig1	3 1664 minus strand SH3 domain-containing protein [Arabidopsis thaliana] >gi|330250956|gb|AEC06050.1| SH3 domain-containing protein [Arabidopsis thaliana]		4	97	1.065			CL8830.Contig1	comp31982_c0_seq2	0.165127	0.946723
	CL4031.Contig1	267 1544 minus strand pyrimidine 1 [Arabidopsis thaliana] >gi|9294485|dbj|BAB02704.1| senescencs-related protein; dihydroorotate dehydrogenase-like protein [Arabidopsis thaliana] >gi|332642489|gb|AEE76010.1| pyrimidine 1 [Arabidopsis thaliana]	CL4031.Contig2 CL4031.Contig3 CL4031.Contig4 CL4031.Contig5 CL4031.Contig6	3	82	0.918			CL4031.Contig1	comp31702_c0_seq1	32.259	0.0251893
	CL1512.Contig1	156 2519 neutral ceramidase [Arabidopsis thaliana] >gi|110810580|sp|Q304B9.1|NCASE_ARATH RecName: Full=Neutral ceramidase; Short=N-CDase; Short=NCDase; AltName: Full=Acylsphingosine deacylase; AltName: Full=N-acylsphingosine amidohydrolase; Flags	CL1512.Contig2	13	270	0.712	*	-	CL1512.Contig1	comp30907_c0_seq1	-0.396555	0.756781
	CL4303.Contig2	105 608 minus strand ATP synthase subunit d [Arabidopsis thaliana] >gi|25089786|sp|Q9FT52.3|ATP5H_ARATH RecName: Full=ATP synthase subunit d, mitochondrial; Short=ATPase subunit d >gi|15215604|gb|AAK91347.1| AT3g52300/T25B15_70 [Arabidopsis thal	CL4303.Contig3	4	60	1.119			CL4303.Contig2	comp28539_c0_seq6	-0.573164	0.650873
	CL4844.Contig2	3 2648 minus strand hypothetical protein ARALYDRAFT_481584 [Arabidopsis lyrata subsp. lyrata] >gi|297326714|gb|EFH57134.1| hypothetical protein ARALYDRAFT_481584 [Arabidopsis lyrata subsp. lyrata]	CL4844.Contig3	4	197	0.84			CL4844.Contig2	comp31909_c0_seq7	-2.33187	0.0239768
	CL4584.Contig1	65 979 minus strand putative Myo28B1 [Brassica napus]		3	88	0.628	*	-	CL4584.Contig1	comp14563_c0_seq1	0.0811471	1
	CL8426.Contig1	208 1422 minus strand aspartate aminotransferase [Arabidopsis thaliana] >gi|21542386|sp|P46645.2|AAT2_ARATH RecName: Full=Aspartate aminotransferase, cytoplasmic isozyme 1; AltName: Full=Transaminase A >gi|109134125|gb|ABG25061.1| At5g19550 [Ara	CL8426.Contig2	26	723	1.146	*		CL8426.Contig1	comp29555_c1_seq5	32.8993	0.0035335
	Unigene20536	122 1024 minus strand proteasome inhibitor subunit 1 (PI31) [Arabidopsis thaliana] >gi|18203248|sp|Q9M330.1|PSMF1_ARATH RecName: Full=Probable proteasome inhibitor >gi|332645645|gb|AEE79166.1| proteasome inhibitor subunit 1 (PI31) [Arabidopsis t		6	162	1.719	*	+	Unigene20536	comp28537_c0_seq1	-0.73773	0.487936
	Unigene17099	164 1183 non-green plastid inner envelope membrane protein precursor [Brassica oleracea var. botrytis]		2	123	1.789			Unigene17099	comp26001_c0_seq1	-2.28932	0.0189174
	CL7567.Contig3	71 1591 minus strand unnamed protein product [Thellungiella halophila]		5	687	0.785			CL7567.Contig3	comp8511_c1_seq1	-31.4447	0.139691
	CL7189.Contig1	145 636 minus strand hypothetical protein ARALYDRAFT_483616 [Arabidopsis lyrata subsp. lyrata] >gi|297327824|gb|EFH58244.1| hypothetical protein ARALYDRAFT_483616 [Arabidopsis lyrata subsp. lyrata]		3	73	1.201			CL7189.Contig1	comp24676_c0_seq1	0.0629425	1
	CL6457.Contig1	204 1742 sorting nexin 2B [Arabidopsis thaliana] >gi|363805551|sp|B9DFS6.1|SNX2B_ARATH RecName: Full=Sorting nexin 2B >gi|222423233|dbj|BAH19593.1| AT5G07120 [Arabidopsis thaliana] >gi|332003729|gb|AED91112.1| sorting nexin 2B [Arabidopsis thalia		3	45	1.415			CL6457.Contig1	comp27848_c0_seq1	-0.575923	0.609333
	CL1669.Contig7	116 1966 minus strand atmap65-1 [Arabidopsis lyrata subsp. lyrata] >gi|297310220|gb|EFH40644.1| atmap65-1 [Arabidopsis lyrata subsp. lyrata]		8	315	1.254			CL1669.Contig7	comp28202_c0_seq1	2.73912	0.0138961
	Unigene29701	213 542 unnamed protein product [Thellungiella halophila]		14	376	1.038			Unigene29701	comp21852_c0_seq1	30.9733	0.205076
	CL1630.Contig3	1 837 molecular chaperone GrpE [Arabidopsis thaliana] >gi|21593024|gb|AAM64973.1| grpE like protein [Arabidopsis thaliana] >gi|332659851|gb|AEE85251.1| molecular chaperone GrpE [Arabidopsis thaliana]	CL1630.Contig4	9	262	0.551			CL1630.Contig3	comp30782_c0_seq7	-0.603422	0.935805
	Unigene22308	1 492 hypothetical protein ARALYDRAFT_915472 [Arabidopsis lyrata subsp. lyrata] >gi|297314140|gb|EFH44563.1| hypothetical protein ARALYDRAFT_915472 [Arabidopsis lyrata subsp. lyrata]		3	152	0.906			Unigene22308	comp30941_c0_seq1	35.3266	1.45e-07	+
	Unigene635	147 755 minus strand LIM domain-containing protein [Arabidopsis lyrata subsp. lyrata] >gi|297325670|gb|EFH56090.1| LIM domain-containing protein [Arabidopsis lyrata subsp. lyrata]		4	109	0.923			Unigene635	comp16305_c0_seq1	1.01403	0.650873
	CL13312.Contig1	433 1854 minus strand UBX domain-containing protein [Arabidopsis lyrata subsp. lyrata] >gi|297335906|gb|EFH66323.1| UBX domain-containing protein [Arabidopsis lyrata subsp. lyrata]	CL13312.Contig2	6	185	0.816			CL13312.Contig1	comp24671_c0_seq1	-0.406299	0.821569
	CL9610.Contig2	60 1145 hypothetical protein ARALYDRAFT_904222 [Arabidopsis lyrata subsp. lyrata] >gi|297326144|gb|EFH56564.1| hypothetical protein ARALYDRAFT_904222 [Arabidopsis lyrata subsp. lyrata]		4	606	0.995			CL9610.Contig2	comp28305_c0_seq4	1.30965	0.334251
	CL8188.Contig1	3 1907 minus strand acylaminoacyl-peptidase [Arabidopsis thaliana] >gi|60729672|pir||JC8016 acylaminoacyl-peptidase (EC 3.4.19.1) - Arabidopsis thaliana >gi|30466066|dbj|BAC76411.1| acylamino acid-releasing enzyme [Arabidopsis thaliana] >gi|3326		6	81	1.758	*	+	CL8188.Contig1	comp30848_c0_seq2	0.58364	0.644374
	Unigene13233	81 311 minus strand homolog of anti-oxidant 1 [Arabidopsis thaliana] >gi|14532548|gb|AAK64002.1| At1g66240/T6J19_6 [Arabidopsis thaliana] >gi|18655401|gb|AAL76156.1| At1g66240/T6J19_6 [Arabidopsis thaliana] >gi|332196360|gb|AEE34481.1| homolog o		19	591	0.609	*	-	Unigene13233	comp97340_c0_seq1	31.2363	0.139691
	CL12773.Contig1	66 674 minus strand Nascent polypeptide-associated complex subunit alpha-like protein 1 [Arabidopsis thaliana] >gi|71151984|sp|Q9LHG9.1|NACA1_ARATH RecName: Full=Nascent polypeptide-associated complex subunit alpha-like protein 1; Short=NAC-alph		17	1072	0.647	*	-	CL12773.Contig1	comp58581_c0_seq1	0.376603	0.935805
	Unigene8787	52 726 Kunitz-type cysteine protease inhibitor [Brassica oleracea var. botrytis]		3	91	4.472			Unigene8787	comp9906_c0_seq1	32.8213	0.00455443
	CL5501.Contig1	80 808 unnamed protein product [Thellungiella halophila]		4	157	1.374			CL5501.Contig1	comp28269_c1_seq1	-0.819317	0.423058
	CL10305.Contig1	3 1646 calmodulin-binding protein [Arabidopsis lyrata subsp. lyrata] >gi|297311973|gb|EFH42397.1| calmodulin-binding protein [Arabidopsis lyrata subsp. lyrata]		2	146	1.61			CL10305.Contig1	comp27413_c0_seq3	32.7864	0.00455443
	Unigene23317	131 823 minus strand hypothetical protein ARALYDRAFT_471818 [Arabidopsis lyrata subsp. lyrata] >gi|297338739|gb|EFH69156.1| hypothetical protein ARALYDRAFT_471818 [Arabidopsis lyrata subsp. lyrata]		9	168	1.095			Unigene23317	comp28432_c0_seq1	0.565244	0.650152
	CL2621.Contig2	108 1442 minus strand IAA-amino acid hydrolase 3 [Brassica rapa]		14	472	0.718	*	-	CL2621.Contig2	comp27651_c0_seq1	-0.209944	0.934475
	CL10487.Contig2	221 874 minus strand leucine-rich repeat-containing protein [Arabidopsis thaliana] >gi|11762126|gb|AAG40341.1|AF324989_1 AT5g21090 [Arabidopsis thaliana] >gi|30023686|gb|AAP13376.1| At5g21090 [Arabidopsis thaliana] >gi|222424256|dbj|BAH20085.1|	CL10487.Contig3	5	97	0.829			CL10487.Contig2	comp32201_c0_seq7	-2.46212	0.0531697
	CL508.Contig1	45 1310 minus strand calreticulin-1 [Arabidopsis thaliana] >gi|11131540|sp|O04151.1|CALR1_ARATH RecName: Full=Calreticulin-1; Flags: Precursor >gi|12321748|gb|AAG50908.1|AC069159_9 calreticulin (crt1) [Arabidopsis thaliana] >gi|12323027|gb|AAG51	CL508.Contig2	29	856	0.939			CL508.Contig1	comp30680_c0_seq3	0.77651	0.447692
	Unigene28897	1 1701 minus strand tudor domain-containing protein [Arabidopsis lyrata subsp. lyrata] >gi|297319142|gb|EFH49564.1| tudor domain-containing protein [Arabidopsis lyrata subsp. lyrata]	Unigene28898 Unigene28899	10	326	1.424			Unigene28897	comp30346_c1_seq2	0.0220826	1
	CL7696.Contig5	17 865 minus strand 3-oxoacyl-[acyl-carrier-protein] synthase I [Arabidopsis thaliana] >gi|332007982|gb|AED95365.1| 3-oxoacyl-[acyl-carrier-protein] synthase I [Arabidopsis thaliana]		3	164	0.729			CL7696.Contig5	comp13012_c0_seq1	-0.430752	0.805793
	CL8803.Contig1	163 1389 pyruvate dehydrogenase E1 beta subunit [Arabidopsis thaliana]	CL8803.Contig2 CL8803.Contig3	4	165	0.471			CL8803.Contig1	comp29459_c0_seq2	0.0146609	1
	Unigene2979	97 1245 minus strand predicted protein [Arabidopsis lyrata subsp. lyrata] >gi|297338190|gb|EFH68607.1| predicted protein [Arabidopsis lyrata subsp. lyrata]		3	110	1.087			Unigene2979	comp17904_c0_seq1	0.598995	0.821569
	CL7364.Contig1	139 597 minus strand hypothetical protein ARALYDRAFT_476560 [Arabidopsis lyrata subsp. lyrata] >gi|297333373|gb|EFH63791.1| hypothetical protein ARALYDRAFT_476560 [Arabidopsis lyrata subsp. lyrata]	CL7364.Contig2 CL7364.Contig3	7	460	1.163			CL7364.Contig1	comp31746_c0_seq18	34.3939	1.2e-05	+
	CL789.Contig1	17 1303 lipoxygenase 2 [Brassica napus]	CL789.Contig2 CL789.Contig3 CL789.Contig4	3	135	5.933	*	+	CL789.Contig1	comp20682_c0_seq1	-1.20836	0.889098
	CL2970.Contig1	20 973 hypothetical protein ARALYDRAFT_898144 [Arabidopsis lyrata subsp. lyrata] >gi|297328935|gb|EFH59354.1| hypothetical protein ARALYDRAFT_898144 [Arabidopsis lyrata subsp. lyrata]		3	77	0.57			CL2970.Contig1	comp31593_c2_seq2	0.256686	0.935805
	Unigene25384	4 951 minus strand predicted protein [Arabidopsis lyrata subsp. lyrata] >gi|297337137|gb|EFH67554.1| predicted protein [Arabidopsis lyrata subsp. lyrata]		3	77	1.635			Unigene25384	comp29635_c0_seq1	-0.185992	0.935805
	Unigene22909	156 1124 aminopeptidase M1 [Arabidopsis thaliana] >gi|17473511|gb|AAL38379.1| AT4g33090/F4I10_20 [Arabidopsis thaliana] >gi|24209879|gb|AAN41401.1| aminopeptidase M [Arabidopsis thaliana] >gi|29028734|gb|AAO64746.1| At4g33090/F4I10_20 [Arabidopsi		9	464	1.537	*	+	Unigene22909	comp20823_c0_seq1	-1.01879	0.261344
	CL775.Contig2	381 1763 minus strand hypothetical protein ARALYDRAFT_899764 [Arabidopsis lyrata subsp. lyrata] >gi|297329739|gb|EFH60158.1| hypothetical protein ARALYDRAFT_899764 [Arabidopsis lyrata subsp. lyrata]		11	625	0.968			CL775.Contig2	comp28074_c1_seq2	0.149537	0.95567
	CL5990.Contig2	6 251 minus strand putative lectin [Arabidopsis thaliana]		5	174	0.793			CL5990.Contig2	comp29839_c0_seq2	35.5481	4.64e-08	+
	Unigene10510	5 406 FAD linked oxidase family protein [Arabidopsis lyrata subsp. lyrata] >gi|297319105|gb|EFH49527.1| FAD linked oxidase family protein [Arabidopsis lyrata subsp. lyrata]		2	69	1.041			Unigene10510	comp22041_c0_seq1	-2.43122	0.00813405
	CL3056.Contig1	143 1714 minus strand hypothetical protein ARALYDRAFT_354499 [Arabidopsis lyrata subsp. lyrata] >gi|297315648|gb|EFH46071.1| hypothetical protein ARALYDRAFT_354499 [Arabidopsis lyrata subsp. lyrata]		5	109	2.345	*	+	CL3056.Contig1	comp105536_c0_seq1	0.206678	1
	CL1136.Contig2	498 1442 minus strand hypothetical protein ARALYDRAFT_492278 [Arabidopsis lyrata subsp. lyrata] >gi|297315506|gb|EFH45929.1| hypothetical protein ARALYDRAFT_492278 [Arabidopsis lyrata subsp. lyrata]	CL1136.Contig4 CL1136.Contig5	4	102	2.359			CL1136.Contig2	comp21867_c0_seq2	-0.751289	0.543022
	Unigene1489	150 395 minus strand predicted protein [Populus trichocarpa] >gi|222849414|gb|EEE86961.1| predicted protein [Populus trichocarpa]	CL4535.Contig3 CL4535.Contig4 Unigene23348 Unigene23349 Unigene28003 Unigene28004 Unigene28005 Unigene28006	5	103	1.214	*	+	Unigene1489	comp28595_c0_seq8	-33.977	7.8e-05	-
	Unigene539	130 1062 minus strand RNA-binding protein cp29 [Arabidopsis thaliana]		2	86	0.825			Unigene539	comp29363_c0_seq2	-31.8214	0.0686039
	CL1557.Contig19	12 1118 glycosyl hydrolase family 79 N-terminal domain-containing protein [Arabidopsis lyrata subsp. lyrata] >gi|297316245|gb|EFH46668.1| glycosyl hydrolase family 79 N-terminal domain-containing protein [Arabidopsis lyrata subsp. lyrata]	CL1557.Contig21 CL1557.Contig22 CL1557.Contig31 CL1557.Contig3	2	79	0.634			CL1557.Contig19	comp25287_c0_seq1	0.624486	0.567915
	CL11587.Contig2	2 1474 minus strand DEAD-box ATP-dependent RNA helicase 53 [Arabidopsis thaliana] >gi|75335516|sp|Q9LUW5.1|RH53_ARATH RecName: Full=DEAD-box ATP-dependent RNA helicase 53 >gi|9293867|dbj|BAB01770.1| DEAD-Box RNA helicase-like protein [Arabidopsi		3	60	0.926			CL11587.Contig2	comp64565_c0_seq1	-1.53029	0.726169
	CL9534.Contig1	160 1593 minus strand DIN3/LTA1 [Arabidopsis lyrata subsp. lyrata] >gi|297330452|gb|EFH60871.1| DIN3/LTA1 [Arabidopsis lyrata subsp. lyrata]		7	333	0.824	*	-	CL9534.Contig1	comp29226_c0_seq1	-0.137393	0.964617
	Unigene1763	236 2056 minus strand hypothetical protein ARALYDRAFT_472806 [Arabidopsis lyrata subsp. lyrata] >gi|297336520|gb|EFH66937.1| hypothetical protein ARALYDRAFT_472806 [Arabidopsis lyrata subsp. lyrata]		21	627	0.753	*	-	Unigene1763	comp22924_c0_seq1	0.376603	0.935805
	CL13495.Contig1	5 4186 minus strand GYF domain-containing protein [Arabidopsis lyrata subsp. lyrata] >gi|297311304|gb|EFH41728.1| GYF domain-containing protein [Arabidopsis lyrata subsp. lyrata]		11	310	1.151			CL13495.Contig1	comp32058_c0_seq1	-0.926199	0.335474
	CL2682.Contig3	74 1087 peroxidase [Arabidopsis thaliana] >gi|42494611|gb|AAS17636.1| peroxidase ATPA2 [Arabidopsis thaliana]		16	480	0.952			CL2682.Contig3	comp28078_c0_seq2	0.973015	0.300144
	CL10123.Contig3	148 1290 hypothetical protein ARALYDRAFT_914168 [Arabidopsis lyrata subsp. lyrata] >gi|297315567|gb|EFH45990.1| hypothetical protein ARALYDRAFT_914168 [Arabidopsis lyrata subsp. lyrata]	CL10123.Contig4	2	47	1.207			CL10123.Contig3	comp24500_c2_seq1	-0.20836	0.98254
	CL1120.Contig1	177 755 Os01g0254000 [Arabidopsis lyrata subsp. lyrata] >gi|297335251|gb|EFH65668.1| Os01g0254000 [Arabidopsis lyrata subsp. lyrata]	CL1120.Contig3	4	100	1.646	*	+	CL1120.Contig1	comp26273_c0_seq2	31.749	0.0686039
	CL4318.Contig2	10 1773 minus strand At2g01970/F14H20.4 [Arabidopsis thaliana]	CL4318.Contig3	3	56	1.451			CL4318.Contig2	comp21400_c0_seq5	1.79164	0.643979
	CL6841.Contig8	148 1032 survival of motor neuron-related-splicing factor 30 [Arabidopsis thaliana] >gi|30678012|ref|NP_849927.1| survival of motor neuron-related-splicing factor 30 [Arabidopsis thaliana] >gi|145328250|ref|NP_001077871.1| survival of motor neuro		4	134	1.134			CL6841.Contig8	comp23263_c0_seq5	-0.416946	0.948145
	CL4166.Contig3	173 1087 minus strand unnamed protein product [Thellungiella halophila]	CL4166.Contig4	3	90	0.987			CL4166.Contig3	comp24837_c0_seq4	-1.61623	0.0712321
	CL14142.Contig1	2 1603 hypothetical protein ARALYDRAFT_480836 [Arabidopsis lyrata subsp. lyrata] >gi|297332091|gb|EFH62510.1| hypothetical protein ARALYDRAFT_480836 [Arabidopsis lyrata subsp. lyrata]		10	554	1.489	*	+	CL14142.Contig1	comp27783_c0_seq1	-34.3273	1.78e-05	-
	CL7931.Contig2	37 480 minus strand nucleoside diphosphate kinase 1 [Brassica rapa] >gi|19744165|dbj|BAB86841.1| NDPK I [Brassica rapa]		3	278	0.826			CL7931.Contig2	comp24208_c0_seq1	0.748023	0.458575
	Unigene25154	3 770 minus strand calcium-binding EF hand family protein [Arabidopsis lyrata subsp. lyrata] >gi|297334263|gb|EFH64681.1| calcium-binding EF hand family protein [Arabidopsis lyrata subsp. lyrata]		3	73	1.597			Unigene25154	comp31723_c0_seq1	-0.20836	0.929808
	CL1226.Contig2	128 1471 minus strand unnamed protein product [Thellungiella halophila]		3	1277	0.941			CL1226.Contig2	comp29327_c0_seq1	2.74785	0.000808581	+
	Unigene5853	39 332 minus strand hypothetical protein ARALYDRAFT_474528 [Arabidopsis lyrata subsp. lyrata] >gi|297340315|gb|EFH70732.1| hypothetical protein ARALYDRAFT_474528 [Arabidopsis lyrata subsp. lyrata]		7	211	0.953			Unigene5853	comp22453_c0_seq2	-1.21593	0.194824
	CL12828.Contig3	97 495 minus strand complex 1 family protein [Arabidopsis lyrata subsp. lyrata] >gi|297330735|gb|EFH61154.1| complex 1 family protein [Arabidopsis lyrata subsp. lyrata]	CL12828.Contig4	4	81	0.593			CL12828.Contig3	comp14459_c0_seq1	-0.275474	0.937989
	CL95.Contig7	201 1808 minus strand calcium dependent kinase 5 [Brassica oleracea var. alboglabra]		7	235	1.185			CL95.Contig7	comp31714_c0_seq4	-31.6082	0.0974087
	CL5010.Contig1	168 866 hypothetical protein ARALYDRAFT_898931 [Arabidopsis lyrata subsp. lyrata] >gi|297329309|gb|EFH59728.1| hypothetical protein ARALYDRAFT_898931 [Arabidopsis lyrata subsp. lyrata]	CL5010.Contig2	5	127	0.819			CL5010.Contig1	comp33935_c0_seq1	-0.00190869	1
	CL8963.Contig2	121 1623 minus strand IMP dehydrogenase [Arabidopsis thaliana] >gi|14194878|sp|Q9SA34.1|IMDH2_ARATH RecName: Full=Inosine-5&apos;-monophosphate dehydrogenase 2; Short=IMP dehydrogenase 2; Short=IMPD 2; Short=IMPDH 2 >gi|4966356|gb|AAD34687.1|AC0		4	118	0.514			CL8963.Contig2	comp29957_c0_seq3	0.819287	0.506456
	CL9746.Contig2	74 835 minus strand predicted protein [Arabidopsis lyrata subsp. lyrata] >gi|297322140|gb|EFH52561.1| predicted protein [Arabidopsis lyrata subsp. lyrata]		29	1113	0.728	*	-	CL9746.Contig2	comp6180_c0_seq1	0.598995	0.821569
	Unigene27714	130 1536 minus strand ATP sulfurylase [Brassica juncea]		2	108	0.94			Unigene27714	comp29893_c0_seq1	0.738969	0.460099
	CL12694.Contig2	68 508 calcium-dependent lipid-binding domain-containing protein [Arabidopsis thaliana] >gi|73920511|sp|Q9C8S6.1|Y1322_ARATH RecName: Full=C2 domain-containing protein At1g63220 >gi|332195950|gb|AEE34071.1| calcium-dependent lipid-binding domain-		3	86	1.489			CL12694.Contig2	comp22681_c0_seq1	-1.44969	0.214812
	CL5889.Contig1	104 1264 minus strand triacylglycerol lipase-like 1 protein [Arabidopsis thaliana] >gi|22135828|gb|AAM91100.1| At1g45200 [Arabidopsis thaliana] >gi|25090355|gb|AAN72283.1| At1g45200/At1g45200 [Arabidopsis thaliana] >gi|332193974|gb|AEE32095.1| t		2	44	1.418			CL5889.Contig1	comp28349_c0_seq1	1.79164	0.201203
	CL12319.Contig3	124 1161 minus strand myb family transcription factor [Brassica oleracea]		2	59	0.727			CL12319.Contig3	comp24436_c1_seq2	1.69082	0.194336
	CL1978.Contig4	53 607 minus strand expressed protein [Arabidopsis lyrata subsp. lyrata] >gi|297325417|gb|EFH55837.1| expressed protein [Arabidopsis lyrata subsp. lyrata]		2	69	0.521			CL1978.Contig4	comp27863_c0_seq2	-5.673	4.79e-05	-
	CL2835.Contig2	195 944 minus strand aluminum induced protein with YGL and LRDR motifs [Arabidopsis thaliana] >gi|14030723|gb|AAK53036.1|AF375452_1 AT4g27450/F27G19_50 [Arabidopsis thaliana] >gi|332659944|gb|AEE85344.1| aluminum induced protein with YGL and LRD		3	112	1.343			CL2835.Contig2	comp27542_c0_seq2	-31.7628	0.0686039
	CL14029.Contig1	105 935 minus strand unnamed protein product [Thellungiella halophila]		8	132	0.762	*	-	CL14029.Contig1	comp27816_c0_seq1	-0.53981	0.642294
	CL9598.Contig2	100 528 NADH dehydrogenase [Arabidopsis thaliana] >gi|75219577|sp|O49313.1|NDADB_ARATH RecName: Full=NADH dehydrogenase [ubiquinone] 1 alpha subcomplex subunit 13-B >gi|2924772|gb|AAC04901.1| expressed protein [Arabidopsis thaliana] >gi|330253707	CL9598.Contig3	2	70	0.619			CL9598.Contig2	comp25920_c0_seq2	-0.602836	0.643062
	CL1329.Contig4	112 1089 guanine nucleotide-binding family protein [Arabidopsis lyrata subsp. lyrata] >gi|297331080|gb|EFH61499.1| guanine nucleotide-binding family protein [Arabidopsis lyrata subsp. lyrata]		10	316	1.399	*	+	CL1329.Contig4	comp31227_c0_seq1	-0.0762722	1
	CL13610.Contig1	34 438 minus strand unnamed protein product [Thellungiella halophila]		14	505	0.83	*	-	CL13610.Contig1	comp14047_c0_seq1	-3.93372	3.37e-06	-
	Unigene25778	169 1227 splicing factor 1 [Arabidopsis thaliana] >gi|30696034|ref|NP_851169.1| splicing factor 1 [Arabidopsis thaliana] >gi|79330558|ref|NP_001032055.1| splicing factor 1 [Arabidopsis thaliana] >gi|222423074|dbj|BAH19518.1| AT5G51300 [Arabidopsi		6	203	0.675	*	-	Unigene25778	comp30582_c0_seq8	-0.265229	0.930707
	Unigene9409	188 832 minus strand glutathione S-transferase ERD13 [Arabidopsis thaliana] >gi|1170089|sp|P42761.3|GSTFA_ARATH RecName: Full=Glutathione S-transferase F10; Short=AtGSTF10; AltName: Full=AtGSTF4; AltName: Full=GST class-phi member 10; AltName: F		3	64	0.958			Unigene9409	comp20626_c0_seq1	-0.836924	0.379515
	CL13.Contig1	1 315 universal stress protein family protein [Brassica rapa]	CL13.Contig3	2	48	0.611			CL13.Contig1	comp31643_c0_seq3	-3.54296	3.1e-05	-
	CL7621.Contig1	1 276 60S ribosomal protein L35a-1 [Arabidopsis thaliana] >gi|297843500|ref|XP_002889631.1| 60S ribosomal protein L35a [Arabidopsis lyrata subsp. lyrata] >gi|75174783|sp|Q9LMK0.1|R35A1_ARATH RecName: Full=60S ribosomal protein L35a-1 >gi|8954039|	CL7621.Contig2	5	140	1.142			CL7621.Contig1	comp26981_c0_seq2	0.834151	0.395876
	CL7137.Contig2	10 1755 hypothetical protein ARALYDRAFT_899777 [Arabidopsis lyrata subsp. lyrata] >gi|297329746|gb|EFH60165.1| hypothetical protein ARALYDRAFT_899777 [Arabidopsis lyrata subsp. lyrata]		14	415	1.045			CL7137.Contig2	comp25703_c0_seq2	-32.6285	0.0102723
	Unigene23421	216 1379 DNA-binding storekeeper protein-related transcriptional regulator [Arabidopsis thaliana] >gi|222424594|dbj|BAH20252.1| AT1G61730 [Arabidopsis thaliana] >gi|332195759|gb|AEE33880.1| DNA-binding storekeeper protein-related transcriptional		2	87	1.7			Unigene23421	comp23572_c0_seq1	0.12203	0.976035
	CL11456.Contig1	1 999 chloroplast amidophosphoribosyltransferase [Arabidopsis thaliana]	CL11456.Contig2	2	61	1.044			CL11456.Contig1	comp29479_c0_seq3	-0.217978	0.99317
	CL13516.Contig1	138 713 ubiquitin-conjugating enzyme 26 [Arabidopsis lyrata subsp. lyrata] >gi|297311662|gb|EFH42086.1| ubiquitin-conjugating enzyme 26 [Arabidopsis lyrata subsp. lyrata]		2	92	0.655			CL13516.Contig1	comp26070_c0_seq1	-0.164638	0.951271
	CL10259.Contig1	2 1297 minus strand hypothetical protein ARALYDRAFT_894871 [Arabidopsis lyrata subsp. lyrata] >gi|297333151|gb|EFH63569.1| hypothetical protein ARALYDRAFT_894871 [Arabidopsis lyrata subsp. lyrata]	CL10259.Contig2 CL10259.Contig3 CL10259.Contig4	3	52	0.941			CL10259.Contig1	comp29631_c0_seq1	-1.71347	0.0489753
	CL5071.Contig2	2 1714 minus strand unnamed protein product [Thellungiella halophila]	CL5071.Contig3	2	75	1.472			CL5071.Contig2	comp30395_c0_seq6	0.839081	0.821569
	CL1519.Contig4	15 824 RecName: Full=Basic endochitinase CHB4; Flags: Precursor >gi|17799|emb|CAA43708.1| chitinase [Brassica napus] >gi|218436742|dbj|BAH03380.1| chitinase [Brassica rapa subsp. chinensis] >gi|244539521|dbj|BAH82668.1| class IV chitinase [Brassi		3	167	0.73	*	-	CL1519.Contig4	comp42207_c0_seq1	-5.25275	0.000570552	-
	CL11458.Contig1	113 1780 minus strand TCP-1/cpn60 chaperonin family protein [Arabidopsis thaliana] >gi|332006171|gb|AED93554.1| TCP-1/cpn60 chaperonin family protein [Arabidopsis thaliana]		11	397	1.351			CL11458.Contig1	comp29681_c0_seq1	0.368041	0.790447
	CL2901.Contig2	97 2778 minus strand EMB2753 [Arabidopsis lyrata subsp. lyrata] >gi|297333672|gb|EFH64090.1| EMB2753 [Arabidopsis lyrata subsp. lyrata]		3	85	1.774			CL2901.Contig2	comp23099_c0_seq2	-0.471394	1
	CL521.Contig2	32 1558 unnamed protein product [Thellungiella halophila]	CL5405.Contig1 Unigene29131	2	45	1.018			CL521.Contig2	comp30949_c0_seq2	0.466801	0.708699
	CL8093.Contig2	180 1511 minus strand BSD domain-containing protein [Arabidopsis thaliana] >gi|3850569|gb|AAC72109.1| ESTs gb|T21276, gb|T45403, and gb|AA586113 come from this gene [Arabidopsis thaliana] >gi|332189441|gb|AEE27562.1| BSD domain-containing protei		3	61	1.493			CL8093.Contig2	comp28126_c0_seq1	-1.34606	0.144738
	Unigene24283	96 524 minus strand glycine-rich RNA-binding protein 2 [Arabidopsis thaliana] >gi|332657934|gb|AEE83334.1| glycine-rich RNA-binding protein 2 [Arabidopsis thaliana]	Unigene24284	34	1444	0.832			Unigene24283	comp29794_c4_seq2	1.75785	0.047407
	Unigene5713	1 435 minus strand thylakoid lumenal 15 kDa protein, chloroplast [Arabidopsis lyrata subsp. lyrata] >gi|297325985|gb|EFH56405.1| thylakoid lumenal 15 kDa protein, chloroplast [Arabidopsis lyrata subsp. lyrata]		4	122	1.224			Unigene5713	comp26019_c0_seq1	0.24732	0.921213
	CL3179.Contig1	95 1150 minus strand unnamed protein product [Thellungiella halophila]		3	43	1.173			CL3179.Contig1	comp29523_c0_seq9	32.9983	0.00275059
	CL1390.Contig2	41 1408 senescence-associated cysteine protease [Brassica oleracea]		12	378	1.113			CL1390.Contig2	comp22654_c0_seq1	-0.783537	0.434793
	CL8777.Contig1	109 909 minus strand hypothetical protein ARALYDRAFT_474895 [Arabidopsis lyrata subsp. lyrata] >gi|297333721|gb|EFH64139.1| hypothetical protein ARALYDRAFT_474895 [Arabidopsis lyrata subsp. lyrata]	CL8777.Contig2 CL8777.Contig3	5	177	1.377			CL8777.Contig1	comp30657_c0_seq2	0.120973	0.978182
	Unigene28114	53 2281 uncharacterized protein [Arabidopsis thaliana] >gi|30725324|gb|AAP37684.1| At3g01680 [Arabidopsis thaliana] >gi|307101698|gb|ADN32814.1| sieve element occlusion b [Arabidopsis thaliana] >gi|332640181|gb|AEE73702.1| uncharacterized protein		5	224	1.701			Unigene28114	comp30125_c0_seq1	3.41377	4.91e-05	+
	CL6617.Contig1	7 1272 glycosyl transferase, family 35 protein [Arabidopsis thaliana] >gi|11994512|dbj|BAB02576.1| glycogen phosphorylase B; starch phosphorylase [Arabidopsis thaliana] >gi|15146189|gb|AAK83578.1| AT3g29320/MUO10_2 [Arabidopsis thaliana] >gi|2776		14	372	1.798	*	+	CL6617.Contig1	comp31472_c0_seq5	0.167865	0.98502
	Unigene27812	3 986 3-isopropylmalate dehydrogenase 3 [Arabidopsis thaliana] >gi|21759264|sp|Q9FMT1.1|LEU33_ARATH RecName: Full=3-isopropylmalate dehydrogenase 3, chloroplastic; Short=3-IPM-DH 3; Short=IMDH 3; AltName: Full=Beta-IPM dehydrogenase 3; Flags: Pre		6	179	1.113			Unigene27812	comp85352_c0_seq1	1.11357	0.726169
	Unigene24130	124 885 minus strand hypothetical protein ARALYDRAFT_490185 [Arabidopsis lyrata subsp. lyrata] >gi|297318591|gb|EFH49013.1| hypothetical protein ARALYDRAFT_490185 [Arabidopsis lyrata subsp. lyrata]	Unigene24131	2	57	1.058			Unigene24130	comp15379_c1_seq1	0.598995	0.84682
	CL6065.Contig3	166 1686 minus strand unnamed protein product [Thellungiella halophila]		6	826	0.612	*	-	CL6065.Contig3	comp30842_c1_seq2	0.0183923	1
	Unigene25622	1 930 pectinesterase 35 [Arabidopsis thaliana] >gi|75311708|sp|Q9LYT5.1|PME35_ARATH RecName: Full=Probable pectinesterase/pectinesterase inhibitor 35; Includes: RecName: Full=Pectinesterase inhibitor 35; AltName: Full=Pectin methylesterase inhibi		3	183	0.425			Unigene25622	comp21486_c0_seq2	3.80749	0.000147179	+
	Unigene25687	1 864 minus strand leucine-rich repeat-containing protein [Arabidopsis thaliana] >gi|7269822|emb|CAB79682.1| extensin-like protein [Arabidopsis thaliana] >gi|332660206|gb|AEE85606.1| leucine-rich repeat-containing protein [Arabidopsis thaliana]		2	69	0.277			Unigene25687	comp30825_c3_seq1	0.943048	0.414367
	Unigene27499	32 580 early nodulin-like protein 8 [Arabidopsis thaliana] >gi|45773786|gb|AAS76697.1| At1g64640 [Arabidopsis thaliana] >gi|46359847|gb|AAS88787.1| At1g64640 [Arabidopsis thaliana] >gi|332196147|gb|AEE34268.1| early nodulin-like protein 8 [Arabid		2	80	0.207			Unigene27499	comp27583_c0_seq1	4.01403	0.000496116	+
	CL8501.Contig1	60 398 minus strand 60S acidic ribosomal protein P2-1 [Arabidopsis thaliana] >gi|19884138|sp|P51407.2|RLA21_ARATH RecName: Full=60S acidic ribosomal protein P2-1 >gi|15294208|gb|AAK95281.1|AF410295_1 At2g27720/F15K20.18 [Arabidopsis thaliana] >g		2	419	0.909			CL8501.Contig1	comp84034_c0_seq1	-0.430752	0.958382
	CL5841.Contig2	1 1749 hypothetical protein ARALYDRAFT_489969 [Arabidopsis lyrata subsp. lyrata] >gi|297318419|gb|EFH48841.1| hypothetical protein ARALYDRAFT_489969 [Arabidopsis lyrata subsp. lyrata]		3	100	1.439			CL5841.Contig2	comp25737_c0_seq1	0.830115	0.431839
	CL1996.Contig6	519 2579 minus strand hypothetical protein ARALYDRAFT_478852 [Arabidopsis lyrata subsp. lyrata] >gi|297330878|gb|EFH61297.1| hypothetical protein ARALYDRAFT_478852 [Arabidopsis lyrata subsp. lyrata]		3	95	0.711			CL1996.Contig6	comp31326_c0_seq12	-0.0310158	1
	CL508.Contig4	65 1333 minus strand putative calcium-binding protein, calreticulin [Arabidopsis thaliana]		3	972	0.763			CL508.Contig4	comp30680_c0_seq5	0.746624	0.480803
	Unigene8217	114 431 AT5g53140/MFH8_8 [Arabidopsis thaliana] >gi|22137282|gb|AAM91486.1| AT5g53140/MFH8_8 [Arabidopsis thaliana]		2	85	0.861			Unigene8217	comp27651_c2_seq1	0.00750347	1
	CL7499.Contig2	26 1027 hypothetical protein ARALYDRAFT_492602 [Arabidopsis lyrata subsp. lyrata] >gi|297315649|gb|EFH46072.1| hypothetical protein ARALYDRAFT_492602 [Arabidopsis lyrata subsp. lyrata]		10	341	1.048			CL7499.Contig2	comp29623_c0_seq2	0.930003	0.361068
	Unigene29734	125 451 hypothetical protein ARALYDRAFT_910661 [Arabidopsis lyrata subsp. lyrata] >gi|297320122|gb|EFH50544.1| hypothetical protein ARALYDRAFT_910661 [Arabidopsis lyrata subsp. lyrata]		7	276	0.548	*	-	Unigene29734	comp15181_c1_seq1	0.48269	0.69957
	CL8427.Contig1	1 363 minus strand cell division control protein 48-A [Arabidopsis thaliana] >gi|1705677|sp|P54609.1|CD48A_ARATH RecName: Full=Cell division control protein 48 homolog A; Short=AtCDC48a >gi|1019904|gb|AAC49120.1| cell division cycle protein [Ara	CL8427.Contig2	4	110	1.046			CL8427.Contig1	comp32235_c0_seq2	-0.0253197	1
	CL931.Contig1	2 2689 minus strand aconitate hydratase 1 [Arabidopsis thaliana] >gi|13124706|sp|Q42560.2|ACO1_ARATH RecName: Full=Aconitate hydratase 1; Short=Aconitase 1; AltName: Full=Citrate hydro-lyase 1 >gi|3805849|emb|CAA21469.1| cytoplasmatic aconitate		25	1206	1.456	*	+	CL931.Contig1	comp29703_c0_seq4	0.396164	0.772124
	CL7439.Contig1	150 779 minus strand Uridylate kinase [Arabidopsis thaliana] >gi|79328724|ref|NP_001031942.1| Uridylate kinase [Arabidopsis thaliana] >gi|2497486|sp|O04905.1|UMPK_ARATH RecName: Full=UMP/CMP kinase; Short=UMP/CMPK; AltName: Full=Uridine monophos		5	78	1.008			CL7439.Contig1	comp26388_c0_seq2	-0.994235	0.57649
	CL12751.Contig2	68 841 minus strand gamma carbonic anhydrase-like 2 [Arabidopsis thaliana] >gi|25091504|sp|Q9SMN1.1|GCAL2_ARATH RecName: Full=Gamma carbonic anhydrase-like 2, mitochondrial; Short=AtCAL2; Short=GAMMA CAL2; Flags: Precursor >gi|332644924|gb|AEE78		17	418	0.669			CL12751.Contig2	comp26500_c0_seq3	0.961565	0.708699
	Unigene28576	4 432 minus strand uncharacterized protein [Arabidopsis thaliana] >gi|332007166|gb|AED94549.1| uncharacterized protein [Arabidopsis thaliana]		5	96	1.214			Unigene28576	comp31176_c0_seq24	-35.35	1.35e-07	-
	CL5615.Contig1	108 2084 minus strand receptor protein kinase PERK1 [Brassica napus]		2	68	0.595			CL5615.Contig1	comp29481_c0_seq1	1.52526	0.109002
	Unigene12630	1 1029 minus strand kas III [Arabidopsis lyrata subsp. lyrata] >gi|297333853|gb|EFH64271.1| kas III [Arabidopsis lyrata subsp. lyrata]		6	247	1.315	*	+	Unigene12630	comp9375_c0_seq1	0.929144	0.372224
	CL2803.Contig4	43 1035 minus strand polygalacturonase inhibitor protein 5, partial [Brassica napus]	CL2803.Contig5	5	169	0.491	*	-	CL2803.Contig4	comp18684_c0_seq3	-31.8597	0.0686039
	CL7173.Contig1	70 1146 minus strand senescence-associated cysteine protease [Brassica oleracea]	CL7173.Contig2	26	1121	1.247	*	+	CL7173.Contig1	comp22898_c0_seq2	0.766998	0.509077
	CL9246.Contig2	1 1125 minus strand subtilase family protein [Arabidopsis lyrata subsp. lyrata] >gi|297313717|gb|EFH44140.1| subtilase family protein [Arabidopsis lyrata subsp. lyrata]		4	102	0.569			CL9246.Contig2	comp31442_c0_seq1	5.72238	9.56e-07	+
	Unigene2439	162 1079 hypothetical protein ARALYDRAFT_891950 [Arabidopsis lyrata subsp. lyrata] >gi|297340080|gb|EFH70497.1| hypothetical protein ARALYDRAFT_891950 [Arabidopsis lyrata subsp. lyrata]		3	134	1.146			Unigene2439	comp30777_c0_seq3	-31.663	0.0974087
	Unigene6830	110 1417 minus strand hypothetical protein ARALYDRAFT_473690 [Arabidopsis lyrata subsp. lyrata] >gi|297337036|gb|EFH67453.1| hypothetical protein ARALYDRAFT_473690 [Arabidopsis lyrata subsp. lyrata]		3	117	1.302			Unigene6830	comp33772_c0_seq1	0.436203	0.726169
	CL859.Contig3	175 1494 minus strand transaldolase [Arabidopsis thaliana] >gi|7543909|emb|CAB87149.1| transaldolase-like protein [Arabidopsis thaliana] >gi|21592744|gb|AAM64693.1| transaldolase-like protein [Arabidopsis thaliana] >gi|332004509|gb|AED91892.1| t		21	544	1.288	*	+	CL859.Contig3	comp28181_c0_seq2	-3.42472	9.18e-05	-
	CL2218.Contig1	206 1633 hypothetical protein OsI_13409 [Oryza sativa Indica Group]	CL2218.Contig2	2	81	0.455			CL2218.Contig1	comp28292_c0_seq1	-0.828511	0.443609
	CL4675.Contig1	176 616 monodehydroascorbate reductase [Brassica oleracea]	CL4675.Contig2	6	144	0.931			CL4675.Contig1	comp18042_c1_seq1	-1.9088	0.0958637
	CL2001.Contig1	138 1316 minus strand Sulfite oxidase, putative [Brassica oleracea]		3	81	1.184			CL2001.Contig1	comp21393_c1_seq1	-32.1817	0.0251893
	CL4330.Contig1	146 892 minus strand 40S ribosomal protein S3-2 [Arabidopsis thaliana] >gi|75183568|sp|Q9M339.1|RS32_ARATH RecName: Full=40S ribosomal protein S3-2 >gi|16226458|gb|AAL16173.1|AF428405_1 AT3g53870/F5K20_170 [Arabidopsis thaliana] >gi|7630007|emb|	CL4330.Contig2 CL4330.Contig3 CL4330.Contig5	14	295	1.839	*	+	CL4330.Contig1	comp31366_c0_seq2	1.56281	0.0686039
	Unigene26329	108 467 phytocystatin 5 [Brassica rapa subsp. pekinensis]		18	681	0.816			Unigene26329	comp32665_c0_seq1	0.40357	0.757394
	CL2733.Contig2	292 1083 minus strand esterase/lipase/thioesterase family protein [Arabidopsis lyrata subsp. lyrata] >gi|297339425|gb|EFH69842.1| esterase/lipase/thioesterase family protein [Arabidopsis lyrata subsp. lyrata]	CL2733.Contig3	4	74	1.458			CL2733.Contig2	comp27082_c0_seq1	0.527211	0.664714
	CL8447.Contig7	175 717 minus strand ATMTN1 [Arabidopsis lyrata subsp. lyrata] >gi|297314700|gb|EFH45123.1| ATMTN1 [Arabidopsis lyrata subsp. lyrata]	CL8447.Contig8 CL8447.Contig9	2	135	1.48			CL8447.Contig7	comp25102_c0_seq2	-1.20836	0.565875
	CL7235.Contig1	164 907 60S ribosomal protein L10-3 [Arabidopsis thaliana] >gi|297838747|ref|XP_002887255.1| 60S ribosomal protein L10 [Arabidopsis lyrata subsp. lyrata] >gi|75249285|sp|Q93W22.1|RL103_ARATH RecName: Full=60S ribosomal protein L10-3 >gi|14194141|		6	227	2.247			CL7235.Contig1	comp23270_c0_seq2	-31.6671	0.0974087
	CL9005.Contig4	95 346 minus strand expressed protein [Arabidopsis lyrata subsp. lyrata] >gi|297335756|gb|EFH66173.1| expressed protein [Arabidopsis lyrata subsp. lyrata]		3	180	1.156			CL9005.Contig4	comp14185_c0_seq1	4.90016	3.08e-06	+
	Unigene24358	2 2542 minus strand zinc knuckle (CCHC-type) family protein [Arabidopsis thaliana] >gi|332008489|gb|AED95872.1| zinc knuckle (CCHC-type) family protein [Arabidopsis thaliana]		3	110	1.573			Unigene24358	comp31261_c1_seq1	-1.2255	0.172836
	Unigene23791	323 1537 Tubby-like F-box protein 3 [Arabidopsis thaliana] >gi|227204449|dbj|BAH57076.1| AT2G47900 [Arabidopsis thaliana] >gi|330255815|gb|AEC10909.1| Tubby-like F-box protein 3 [Arabidopsis thaliana]		4	38	0.641	*	-	Unigene23791	comp31380_c0_seq6	32.2743	0.0184434
	CL6428.Contig1	169 2490 minus strand auxilin-related protein 2 [Arabidopsis thaliana] >gi|122230016|sp|Q0WQ57.1|AUXI2_ARATH RecName: Full=Auxilin-related protein 2 >gi|110737602|dbj|BAF00742.1| auxilin-like protein [Arabidopsis thaliana] >gi|332657777|gb|AEE83	CL6428.Contig2	4	134	1.768			CL6428.Contig1	comp31261_c1_seq5	-1.0948	0.326329
	CL3643.Contig1	291 1676 hypothetical protein ARALYDRAFT_323856 [Arabidopsis lyrata subsp. lyrata] >gi|297322027|gb|EFH52448.1| hypothetical protein ARALYDRAFT_323856 [Arabidopsis lyrata subsp. lyrata]	CL3643.Contig2 CL3643.Contig5 CL3643.Contig7	3	427	1.26			CL3643.Contig1	comp27908_c0_seq1	-0.0322762	1
	CL14558.Contig1	163 732 40S ribosomal protein S7-3 [Arabidopsis thaliana] >gi|115311860|sp|Q8LD03.2|RS73_ARATH RecName: Full=40S ribosomal protein S7-3 >gi|9755823|emb|CAC01854.1| 40S ribosomal protein S7-like [Arabidopsis thaliana] >gi|90568000|gb|ABD94070.1| A	CL14558.Contig2	3	111	1.373			CL14558.Contig1	comp29395_c0_seq3	0.752104	0.478904
	CL13064.Contig1	106 966 minus strand uncharacterized protein [Arabidopsis thaliana] >gi|332643128|gb|AEE76649.1| uncharacterized protein [Arabidopsis thaliana]		5	107	0.684	*	-	CL13064.Contig1	comp30898_c0_seq5	0.853609	0.609414
	Unigene30174	59 361 minus strand ketol-acid reductoisomerase [Arabidopsis lyrata subsp. lyrata] >gi|297322308|gb|EFH52729.1| ketol-acid reductoisomerase [Arabidopsis lyrata subsp. lyrata]		2	45	1.292			Unigene30174	comp35801_c0_seq1	-0.605808	0.723317
	CL14346.Contig1	132 1397 phospholipase C [Arabidopsis lyrata subsp. lyrata] >gi|297312551|gb|EFH42975.1| phospholipase C [Arabidopsis lyrata subsp. lyrata]	CL14346.Contig2	6	192	0.736	*	-	CL14346.Contig1	comp30578_c0_seq2	33.6139	0.000314086	+
	CL9725.Contig1	137 373 small nuclear ribonucleoprotein G [Arabidopsis thaliana] >gi|332641534|gb|AEE75055.1| small nuclear ribonucleoprotein G [Arabidopsis thaliana]	Unigene28079	3	159	0.805	*	-	CL9725.Contig1	comp25086_c0_seq1	-33.2031	0.00135711
	CL5461.Contig1	95 544 cytoplasmic ribosomal protein S14 [Brassica napus]	CL5461.Contig2 CL14279.Contig1 Unigene23505 Unigene23506	13	400	1.355			CL5461.Contig1	comp29309_c2_seq3	1.3736	0.123049
	CL12128.Contig1	1153 2304 multiubiquitin chain binding protein MBP1 [Arabidopsis lyrata subsp. lyrata] >gi|297314686|gb|EFH45109.1| multiubiquitin chain binding protein MBP1 [Arabidopsis lyrata subsp. lyrata]	CL12128.Contig2	9	278	0.702	*	-	CL12128.Contig1	comp101954_c0_seq1	-0.20836	1
	Unigene2662	3 1250 hypothetical protein ARALYDRAFT_474570 [Arabidopsis lyrata subsp. lyrata] >gi|297337656|gb|EFH68073.1| hypothetical protein ARALYDRAFT_474570 [Arabidopsis lyrata subsp. lyrata]		3	71	0.513			Unigene2662	comp30787_c0_seq1	-0.0216363	1
	Unigene1844	37 582 leucine aminopeptidase 3 [Arabidopsis thaliana] >gi|85700452|sp|Q944P7.2|AMPL3_ARATH RecName: Full=Leucine aminopeptidase 3, chloroplastic; AltName: Full=Leucyl aminopeptidase 3; Short=LAP 3; AltName: Full=Proline aminopeptidase 3; AltName		3	71	1.385			Unigene1844	comp22245_c0_seq2	0.265283	0.903577
	Unigene18459	13 1149 minus strand glycosyl hydrolase family 18 protein [Arabidopsis lyrata subsp. lyrata] >gi|297313756|gb|EFH44179.1| glycosyl hydrolase family 18 protein [Arabidopsis lyrata subsp. lyrata]		6	184	1.116			Unigene18459	comp94674_c0_seq1	-1.01571	0.821569
	CL5273.Contig2	147 764 RAB GTPase homolog G3E [Arabidopsis thaliana] >gi|79319588|ref|NP_001031161.1| RAB GTPase homolog G3E [Arabidopsis thaliana] >gi|75215673|sp|Q9XI98.1|RAG3E_ARATH RecName: Full=Ras-related protein RABG3e; Short=AtRABG3e; AltName: Full=Ras-	Unigene26274	2	191	1.661			CL5273.Contig2	comp11253_c0_seq1	0.739173	0.632336
	Unigene26306	227 1681 minus strand 6-phosphogluconate dehydrogenase [Arabidopsis thaliana] >gi|30678559|ref|NP_850502.1| 6-phosphogluconate dehydrogenase [Arabidopsis thaliana] >gi|15983434|gb|AAL11585.1|AF424591_1 AT3g02360/F11A12_104 [Arabidopsis thaliana]		20	520	1.042			Unigene26306	comp101743_c0_seq1	1.3766	0.586561
	CL2419.Contig2	69 650 minus strand 60S ribosomal protein L9-1 [Arabidopsis thaliana] >gi|18398761|ref|NP_564418.1| 60S ribosomal protein L9-1 [Arabidopsis thaliana] >gi|22096367|sp|P49209.3|RL91_ARATH RecName: Full=60S ribosomal protein L9-1 >gi|11692872|gb|AA		2	159	1.788			CL2419.Contig2	comp27831_c0_seq1	0.78887	0.425168
	CL5177.Contig3	3 605 hypothetical protein ARALYDRAFT_476882 [Arabidopsis lyrata subsp. lyrata] >gi|297334969|gb|EFH65387.1| hypothetical protein ARALYDRAFT_476882 [Arabidopsis lyrata subsp. lyrata]		3	155	2.413	*	+	CL5177.Contig3	comp29117_c0_seq2	-0.929095	0.321743
	CL2420.Contig2	190 1548 minus strand hypothetical protein ARALYDRAFT_491537 [Arabidopsis lyrata subsp. lyrata] >gi|297313102|gb|EFH43525.1| hypothetical protein ARALYDRAFT_491537 [Arabidopsis lyrata subsp. lyrata]	CL2420.Contig4	12	239	1.607	*	+	CL2420.Contig2	comp30311_c0_seq1	-34.2894	2.03e-05	-
	CL4021.Contig2	60 890 hypothetical protein ARALYDRAFT_473745 [Arabidopsis lyrata subsp. lyrata] >gi|297339778|gb|EFH70195.1| hypothetical protein ARALYDRAFT_473745 [Arabidopsis lyrata subsp. lyrata]	CL4021.Contig3	7	395	1.146			CL4021.Contig2	comp26098_c1_seq1	0.2246	0.98254
	Unigene16704	59 1021 minus strand TOC159 [Arabidopsis lyrata subsp. lyrata] >gi|297320747|gb|EFH51169.1| TOC159 [Arabidopsis lyrata subsp. lyrata]		5	294	0.913			Unigene16704	comp29751_c0_seq1	-0.164584	0.950646
	CL1217.Contig1	89 865 minus strand Clathrin light chain protein [Arabidopsis thaliana] >gi|75096962|sp|O04209.1|CLC2_ARATH RecName: Full=Clathrin light chain 2 >gi|2088662|gb|AAB95291.1| expressed protein [Arabidopsis thaliana] >gi|330254676|gb|AEC09770.1| Cla		18	438	1.231	*	+	CL1217.Contig1	comp27558_c0_seq2	36.0186	3.96e-09	+
	Unigene22122	51 1502 Xaa-Pro dipeptidase [Arabidopsis thaliana] >gi|332660237|gb|AEE85637.1| Xaa-Pro dipeptidase [Arabidopsis thaliana]		2	98	1.284			Unigene22122	comp23409_c0_seq1	-0.233022	0.894967
	CL2249.Contig1	1 2220 minus strand hypothetical protein ARALYDRAFT_896937 [Arabidopsis lyrata subsp. lyrata] >gi|297330502|gb|EFH60921.1| hypothetical protein ARALYDRAFT_896937 [Arabidopsis lyrata subsp. lyrata]		4	159	0.687			CL2249.Contig1	comp31873_c0_seq2	0.0570218	1
	CL12778.Contig1	161 1468 minus strand hypothetical protein ARALYDRAFT_482793 [Arabidopsis lyrata subsp. lyrata] >gi|297325550|gb|EFH55970.1| hypothetical protein ARALYDRAFT_482793 [Arabidopsis lyrata subsp. lyrata]	CL12778.Contig2	7	108	1.092			CL12778.Contig1	comp30937_c0_seq2	2.22439	0.194336
	CL1368.Contig2	110 808 unnamed protein product [Thellungiella halophila]		8	267	2.906	*	+	CL1368.Contig2	comp32413_c0_seq1	0.298334	0.840428
	Unigene2998	26 874 unnamed protein product [Thellungiella halophila]		15	410	0.934			Unigene2998	comp14270_c0_seq1	0.0627122	1
	CL4122.Contig2	48 2690 minus strand hypothetical protein ARALYDRAFT_906237 [Arabidopsis lyrata subsp. lyrata] >gi|297323518|gb|EFH53939.1| hypothetical protein ARALYDRAFT_906237 [Arabidopsis lyrata subsp. lyrata]	CL4122.Contig3	5	107	0.819			CL4122.Contig2	comp20056_c0_seq1	1.79164	0.643979
	CL9850.Contig1	619 2445 minus strand hypothetical protein ARALYDRAFT_479458 [Arabidopsis lyrata subsp. lyrata] >gi|297329021|gb|EFH59440.1| hypothetical protein ARALYDRAFT_479458 [Arabidopsis lyrata subsp. lyrata]	CL9850.Contig3	2	102	2.271			CL9850.Contig1	comp31117_c0_seq5	-0.0817228	1
	Unigene2838	227 1003 hypothetical protein ARALYDRAFT_910412 [Arabidopsis lyrata subsp. lyrata] >gi|297317921|gb|EFH48343.1| hypothetical protein ARALYDRAFT_910412 [Arabidopsis lyrata subsp. lyrata]		3	128	0.942			Unigene2838	comp28195_c0_seq1	-1.592	0.071363
	CL10431.Contig1	49 1059 aspartate/glutamate/uridylate kinase family protein [Arabidopsis lyrata subsp. lyrata] >gi|297324000|gb|EFH54421.1| aspartate/glutamate/uridylate kinase family protein [Arabidopsis lyrata subsp. lyrata]		2	77	0.708			CL10431.Contig1	comp27965_c0_seq3	0.58519	0.916934
	Unigene15003	33 611 uncharacterized protein [Arabidopsis thaliana] >gi|147742899|sp|Q8LDV3.2|Y4320_ARATH RecName: Full=Uncharacterized protein At4g13200, chloroplastic; Flags: Precursor >gi|332657844|gb|AEE83244.1| uncharacterized protein [Arabidopsis thalian		4	135	0.642	*	-	Unigene15003	comp17061_c0_seq1	0.550632	0.746244
	CL6999.Contig1	141 851 minus strand hypothetical protein ARALYDRAFT_918574 [Arabidopsis lyrata subsp. lyrata] >gi|297310169|gb|EFH40593.1| hypothetical protein ARALYDRAFT_918574 [Arabidopsis lyrata subsp. lyrata]	Unigene25306	14	410	0.826			CL6999.Contig1	comp22957_c0_seq4	-0.749932	0.456364
	CL1624.Contig2	103 1440 minus strand glycoside hydrolase family 28 protein / polygalacturonase (pectinase) family protein [Arabidopsis thaliana] >gi|332642352|gb|AEE75873.1| glycoside hydrolase family 28 protein / polygalacturonase (pectinase) family protein [		3	170	0.611			CL1624.Contig2	comp23415_c0_seq1	1.54528	0.0913612
	CL4396.Contig2	411 2387 minus strand DEAD-box ATP-dependent RNA helicase 37 [Arabidopsis thaliana] >gi|108861890|sp|Q84W89.2|RH37_ARATH RecName: Full=DEAD-box ATP-dependent RNA helicase 37 >gi|330255039|gb|AEC10133.1| DEAD-box ATP-dependent RNA helicase 37 [Ar	CL4396.Contig3 CL4396.Contig4	2	390	1.227			CL4396.Contig2	comp31730_c0_seq1	-2.5649	0.00663272
	CL5362.Contig1	175 822 germin-like protein subfamily 2 member 1 [Arabidopsis thaliana] >gi|374095418|sp|P94014.2|GL21_ARATH RecName: Full=Germin-like protein subfamily 2 member 1; Flags: Precursor >gi|11692852|gb|AAG40029.1|AF324678_1 At1g09560 [Arabidopsis tha	CL5362.Contig2 CL5362.Contig3 CL5362.Contig4 CL5362.Contig5 CL5362.Contig6 Unigene24057 Unigene24058	5	197	0.741			CL5362.Contig1	comp54152_c0_seq1	4.74584	0.00158471
	Unigene16712	101 652 hypothetical protein ARALYDRAFT_481300 [Arabidopsis lyrata subsp. lyrata] >gi|297324593|gb|EFH55013.1| hypothetical protein ARALYDRAFT_481300 [Arabidopsis lyrata subsp. lyrata]		2	101	1.29			Unigene16712	comp23258_c0_seq1	2.3152	0.0640282
	Unigene29629	79 474 minus strand putative phospho-ser/thr phosphatase [Arabidopsis thaliana] >gi|7270178|emb|CAB77793.1| putative phospho-ser/thr phosphatase [Arabidopsis thaliana]		2	69	0.904			Unigene29629	comp29105_c0_seq2	33.3809	0.000705527	+
	CL1086.Contig3	1 778 LEN=1019; minus strand; translated		9	255	1.672	*	+	CL1086.Contig3	comp24171_c0_seq1	-7.49635	3.32e-11	-
	CL3633.Contig4	55 420 spiral1 [Brassica juncea]		10	249	0.897			CL3633.Contig4	comp31510_c0_seq5	0.138652	0.975017
	CL3363.Contig1	6 2216 minus strand pre-mRNA-splicing factor CWC22 [Arabidopsis thaliana] >gi|6503305|gb|AAF14681.1|AC011713_29 Contains similarity to gb|U19615 LET 858 gene from Caenorhabditis elegans. ESTs gb|AI995150, gb|H76674 and gb|R84035 come from this g		3	91	2.1			CL3363.Contig1	comp32035_c0_seq3	-0.718875	0.522411
	Unigene25689	120 3674 ATP-dependent RNA helicase DHX8/PRP22 [Arabidopsis thaliana] >gi|27735187|sp|Q38953.2|DHX8_ARATH RecName: Full=Probable pre-mRNA-splicing factor ATP-dependent RNA helicase >gi|9293935|dbj|BAB01838.1| pre-mRNA splicing factor ATP-dependen		2	58	2.802			Unigene25689	comp31863_c0_seq13	-32.4709	0.0136901
	CL6668.Contig2	87 914 minus strand porin-like protein [Brassica napus]		10	488	0.595	*	-	CL6668.Contig2	comp23105_c0_seq1	-0.282161	0.855499
	CL1880.Contig1	2 1000 hypothetical protein ARALYDRAFT_480812 [Arabidopsis lyrata subsp. lyrata] >gi|297332073|gb|EFH62492.1| hypothetical protein ARALYDRAFT_480812 [Arabidopsis lyrata subsp. lyrata]		3	145	0.835			CL1880.Contig1	comp31658_c0_seq4	-1.2702	0.223279
	CL6100.Contig2	259 1728 minus strand phosphoethanolamine N-methyltransferase [Brassica napus]		3	92	1.254			CL6100.Contig2	comp22789_c0_seq1	3.68094	0.000104431	+
	Unigene6221	127 684 unnamed protein product [Thellungiella halophila]		2	65	1.678			Unigene6221	comp33033_c0_seq1	0.497909	0.678829
	Unigene18820	209 1369 minus strand hypothetical protein ARALYDRAFT_476882 [Arabidopsis lyrata subsp. lyrata] >gi|297334969|gb|EFH65387.1| hypothetical protein ARALYDRAFT_476882 [Arabidopsis lyrata subsp. lyrata]		11	309	1.038			Unigene18820	comp26967_c0_seq2	-32.4447	0.0136901
	CL11999.Contig2	58 1362 minus strand monodehydroascorbate reductase (NADH)-like protein [Arabidopsis thaliana]		27	870	1.456	*	+	CL11999.Contig2	comp23036_c0_seq1	-0.988274	0.27763
	CL1226.Contig1	128 1468 minus strand tubulin, beta chain [Populus trichocarpa] >gi|222849812|gb|EEE87359.1| tubulin, beta chain [Populus trichocarpa]	CL1226.Contig5	3	1606	0.912			CL1226.Contig1	comp29840_c2_seq6	2.08373	0.0121301
	CL10451.Contig3	2 748 minus strand peroxidase precursor [Raphanus sativus var. niger]		12	576	0.771	*	-	CL10451.Contig3	comp14718_c1_seq1	-4.9088	0.00189581
	Unigene2767	10 1068 uncharacterized protein [Arabidopsis thaliana] >gi|330253560|gb|AEC08654.1| uncharacterized protein [Arabidopsis thaliana]		12	304	1.358	*	+	Unigene2767	comp31826_c0_seq1	31.4505	0.0974087
	Unigene27953	162 1238 minus strand HpcH/HpaI aldolase family protein [Arabidopsis lyrata subsp. lyrata] >gi|297318372|gb|EFH48794.1| HpcH/HpaI aldolase family protein [Arabidopsis lyrata subsp. lyrata]		7	348	0.964			Unigene27953	comp25627_c0_seq1	-0.492728	0.678829
	Unigene18251	2 316 60S ribosomal protein L9 [Arabidopsis lyrata subsp. lyrata] >gi|297320465|gb|EFH50887.1| 60S ribosomal protein L9 [Arabidopsis lyrata subsp. lyrata]	Unigene18252	3	94	1.647			Unigene18251	comp30486_c0_seq2	0.333068	0.828432
	CL12910.Contig1	2 1267 armadillo/beta-catenin repeat family protein [Arabidopsis lyrata subsp. lyrata] >gi|297326323|gb|EFH56743.1| armadillo/beta-catenin repeat family protein [Arabidopsis lyrata subsp. lyrata]		2	63	0.821			CL12910.Contig1	comp31844_c1_seq3	1.16805	0.388716
	Unigene21237	65 1918 hypothetical protein ARALYDRAFT_480310 [Arabidopsis lyrata subsp. lyrata] >gi|297329641|gb|EFH60060.1| hypothetical protein ARALYDRAFT_480310 [Arabidopsis lyrata subsp. lyrata]		13	323	1.41	*	+	Unigene21237	comp23994_c0_seq1	-0.196558	0.918693
	CL4529.Contig1	1 483 minus strand hypothetical protein ARALYDRAFT_903778 [Arabidopsis lyrata subsp. lyrata] >gi|297327768|gb|EFH58188.1| hypothetical protein ARALYDRAFT_903778 [Arabidopsis lyrata subsp. lyrata]	CL4529.Contig3	3	458	0.688			CL4529.Contig1	comp26553_c0_seq2	-1.19444	0.292068
	CL12123.Contig1	399 590 minus strand translation machinery associated protein TMA7 [Arabidopsis thaliana] >gi|5103825|gb|AAD39655.1|AC007591_20 ESTs gb|AA650895, gb|AA720043 and gb|R29777 come from this gene [Arabidopsis thaliana] >gi|332191176|gb|AEE29297.1| t	CL12123.Contig2 CL12123.Contig3 Unigene19200	4	120	1.979	*	+	CL12123.Contig1	comp23314_c0_seq2	0.3166	0.831839
	CL830.Contig18	42 548 minus strand RecName: Full=Glycine-rich RNA-binding protein GRP2A >gi|496237|gb|AAA59213.1| homology with RNA-binding proteins in meristematic tissue [Sinapis alba]	CL830.Contig19 CL830.Contig20	31	1050	1.125	*		CL830.Contig18	comp30332_c0_seq14	1.446	0.294209
	CL9005.Contig2	5 373 minus strand expressed protein [Arabidopsis lyrata subsp. lyrata] >gi|297335756|gb|EFH66173.1| expressed protein [Arabidopsis lyrata subsp. lyrata]		4	160	0.866			CL9005.Contig2	comp14872_c0_seq1	3.55519	7.24e-05	+
	CL978.Contig1	1 1296 minus strand hypothetical protein ARALYDRAFT_473745 [Arabidopsis lyrata subsp. lyrata] >gi|297339778|gb|EFH70195.1| hypothetical protein ARALYDRAFT_473745 [Arabidopsis lyrata subsp. lyrata]		4	99	0.99			CL978.Contig1	comp27788_c0_seq2	0.322995	0.916934
	CL434.Contig1	193 1065 unknown [Arabidopsis thaliana]		7	112	2.191	*	+	CL434.Contig1	comp27487_c0_seq4	-0.805467	0.467855
	CL1957.Contig1	304 5433 minus strand Clathrin, heavy chain [Arabidopsis thaliana] >gi|122223702|sp|Q0WNJ6.1|CLAH1_ARATH RecName: Full=Clathrin heavy chain 1 >gi|332641484|gb|AEE75005.1| Clathrin, heavy chain [Arabidopsis thaliana]	CL1957.Contig2	45	1167	1.394	*	+	CL1957.Contig1	comp23930_c1_seq1	0.249712	0.893951
	CL9682.Contig1	2 1501 minus strand UDP-sugar pyrophosphorylase [Arabidopsis thaliana] >gi|75168956|sp|Q9C5I1.1|USP_ARATH RecName: Full=UDP-sugar pyrophosphorylase; Short=AtUSP >gi|84181457|gb|ABC55066.1| nonspecific UDP-sugar pyrophosphorylase [Arabidopsis tha		3	105	0.728			CL9682.Contig1	comp23057_c0_seq1	1.03557	0.389877
	Unigene17880	3 1076 minus strand hypothetical protein ARALYDRAFT_476678 [Arabidopsis lyrata subsp. lyrata] >gi|297334860|gb|EFH65278.1| hypothetical protein ARALYDRAFT_476678 [Arabidopsis lyrata subsp. lyrata]		4	127	1.175			Unigene17880	comp28473_c0_seq1	-0.0949466	0.995945
	Unigene8902	2 106 hypothetical protein ARALYDRAFT_913675 [Arabidopsis lyrata subsp. lyrata] >gi|297315338|gb|EFH45761.1| hypothetical protein ARALYDRAFT_913675 [Arabidopsis lyrata subsp. lyrata]		4	70	0.591	*	-	Unigene8902	comp11170_c0_seq1	0.79164	0.780368
	CL14574.Contig2	86 1843 hypothetical protein ARALYDRAFT_904748 [Arabidopsis lyrata subsp. lyrata] >gi|297322767|gb|EFH53188.1| hypothetical protein ARALYDRAFT_904748 [Arabidopsis lyrata subsp. lyrata]		5	230	0.958			CL14574.Contig2	comp30227_c0_seq3	-2.13436	0.137376
	CL2762.Contig2	142 1017 minus strand xyloglucan endotransglycosylase [Brassica rapa subsp. pekinensis]		13	409	0.833	*	-	CL2762.Contig2	comp24514_c0_seq1	4.1866	2.35e-06	+
	CL14527.Contig3	1 1017 minus strand hypothetical protein ARALYDRAFT_902809 [Arabidopsis lyrata subsp. lyrata] >gi|297327315|gb|EFH57735.1| hypothetical protein ARALYDRAFT_902809 [Arabidopsis lyrata subsp. lyrata]		4	637	0.917			CL14527.Contig3	comp29605_c0_seq1	3.37456	6.17e-05	+
	CL2279.Contig3	79 1245 minus strand unnamed protein product [Thellungiella halophila]	CL2279.Contig4 CL2279.Contig5 CL2279.Contig6	31	658	3.372	*	+	CL2279.Contig3	comp31845_c0_seq3	1.29334	0.141742
	Unigene25708	3 824 type I phosphodiesterase/nucleotide pyrophosphatase family protein [Arabidopsis lyrata subsp. lyrata] >gi|297313232|gb|EFH43655.1| type I phosphodiesterase/nucleotide pyrophosphatase family protein [Arabidopsis lyrata subsp. lyrata]		3	55	1.253			Unigene25708	comp31557_c0_seq1	0.462333	0.738923
	CL3856.Contig1	126 1400 minus strand senescence-associated cysteine protease [Brassica oleracea]		3	128	1.247			CL3856.Contig1	comp25626_c0_seq1	1.30354	0.190039
	CL1978.Contig1	229 786 minus strand expressed protein [Arabidopsis lyrata subsp. lyrata] >gi|297325417|gb|EFH55837.1| expressed protein [Arabidopsis lyrata subsp. lyrata]	CL1978.Contig3	2	146	0.526			CL1978.Contig1	comp27863_c0_seq1	32.7507	0.00591794
	Unigene19830	9 395 minus strand VHS and GAT domain-containing protein [Arabidopsis thaliana] >gi|209529799|gb|ACI49794.1| At2g38410 [Arabidopsis thaliana] >gi|330254440|gb|AEC09534.1| VHS and GAT domain-containing protein [Arabidopsis thaliana]		2	115	1.289			Unigene19830	comp21017_c0_seq1	-1.52095	0.115132
	Unigene15991	1 324 dihydrodipicolinate synthase 1 [Arabidopsis thaliana] >gi|7329698|emb|CAB82692.1| dihydrodipicolinate synthase precursor [Arabidopsis thaliana] >gi|21593306|gb|AAM65255.1| Dihydrodipicolinate synthase 1, chloroplast precursor (DHDPS 1) [Ara		3	180	0.726			Unigene15991	comp19741_c0_seq1	0.277067	0.947992
	Unigene18623	3 1205 minus strand hypothetical protein ARALYDRAFT_323273 [Arabidopsis lyrata subsp. lyrata] >gi|297321614|gb|EFH52035.1| hypothetical protein ARALYDRAFT_323273 [Arabidopsis lyrata subsp. lyrata]		2	95	2.367			Unigene18623	comp28877_c0_seq1	-1.07434	0.242577
	Unigene30856	65 244 adenosine kinase 2 [Arabidopsis thaliana] >gi|17366963|sp|Q9LZG0.1|ADK2_ARATH RecName: Full=Adenosine kinase 2; Short=AK 2; AltName: Full=Adenosine 5&apos;-phosphotransferase 2 >gi|12017764|gb|AAG45247.1|AF180895_1 adenosine kinase 2 [Arab		3	94	1.025			Unigene30856	comp30565_c0_seq2	2.50479	0.00332283
	CL342.Contig3	303 1115 minus strand uncharacterized protein [Arabidopsis thaliana] >gi|30725348|gb|AAP37696.1| At5g15120 [Arabidopsis thaliana] >gi|332004736|gb|AED92119.1| uncharacterized protein [Arabidopsis thaliana]	CL342.Contig5 CL342.Contig6 CL342.Contig7	2	52	0.792			CL342.Contig3	comp26126_c0_seq1	-0.766355	0.502999
	Unigene8814	177 626 minus strand chaperone DnaJ-domain containing protein [Arabidopsis thaliana] >gi|332661266|gb|AEE86666.1| chaperone DnaJ-domain containing protein [Arabidopsis thaliana]		6	267	1.197			Unigene8814	comp26037_c1_seq3	0.306534	0.987975
	CL3536.Contig1	86 1309 minus strand beta-ureidopropionase [Arabidopsis thaliana] >gi|28193999|gb|AAO33358.1|AF465754_1 N-carbamyl-beta-alanine amidohydrolase [Arabidopsis thaliana] >gi|23306402|gb|AAN17428.1| beta-ureidopropionase [Arabidopsis thaliana] >gi|30		7	134	0.84			CL3536.Contig1	comp13497_c0_seq1	-0.20836	1
	CL7917.Contig1	141 575 signal recognition particle subunit SRP19 [Arabidopsis thaliana] >gi|21542239|sp|Q943Z6.1|SRP19_ARATH RecName: Full=Signal recognition particle 19 kDa protein; Short=SRP19 >gi|16612311|gb|AAL27515.1|AF439847_1 At1g48160/F21D18_11 [Arabido	CL7917.Contig2	6	160	0.678			CL7917.Contig1	comp22495_c0_seq1	-0.471394	0.746244
	CL7317.Contig1	7 171 minus strand uncharacterized protein [Arabidopsis thaliana] >gi|22327975|ref|NP_680457.1| uncharacterized protein [Arabidopsis thaliana] >gi|334188494|ref|NP_001190570.1| uncharacterized protein [Arabidopsis thaliana] >gi|17381284|gb|AAL36	Unigene20112	2	64	1.507			CL7317.Contig1	comp22718_c0_seq2	-0.23094	0.903022
	CL3740.Contig1	1 1731 uncharacterized protein [Arabidopsis thaliana] >gi|334187738|ref|NP_001190328.1| uncharacterized protein [Arabidopsis thaliana] >gi|332005101|gb|AED92484.1| uncharacterized protein [Arabidopsis thaliana] >gi|332005102|gb|AED92485.1| unchar		6	209	1.245			CL3740.Contig1	comp28840_c0_seq3	-1.61896	0.292885
	CL5689.Contig2	252 986 minus strand EMB1624 [Arabidopsis lyrata subsp. lyrata] >gi|297322154|gb|EFH52575.1| EMB1624 [Arabidopsis lyrata subsp. lyrata]	CL5689.Contig3	5	125	0.559			CL5689.Contig2	comp20587_c0_seq1	-0.487934	0.690772
	CL10324.Contig2	56 1468 minus strand hypothetical protein ARALYDRAFT_324272 [Arabidopsis lyrata subsp. lyrata] >gi|297324010|gb|EFH54431.1| hypothetical protein ARALYDRAFT_324272 [Arabidopsis lyrata subsp. lyrata]		10	303	0.761			CL10324.Contig2	comp22878_c0_seq2	-0.102353	0.997029
	CL8301.Contig3	102 1481 RecName: Full=Glutamate-1-semialdehyde 2,1-aminomutase, chloroplastic; Short=GSA; AltName: Full=Glutamate-1-semialdehyde aminotransferase; Short=GSA-AT; Flags: Precursor >gi|28972461|gb|AAO63782.1|AF364595_1 glutamate 1-semialdehyde amin		5	177	1.07			CL8301.Contig3	comp21068_c0_seq1	-0.20836	1
	Unigene23092	83 580 minus strand Lactoylglutathione lyase / glyoxalase I-like protein [Arabidopsis thaliana] >gi|73921149|sp|Q9LV66.1|Y5848_ARATH RecName: Full=Uncharacterized protein At5g48480 >gi|332008292|gb|AED95675.1| Lactoylglutathione lyase / glyoxala		8	320	1.058			Unigene23092	comp10336_c0_seq2	1.19763	0.407743
	Unigene21947	1 1296 minus strand peptidyl-prolyl cis-trans isomerase cyclophilin-type family protein [Arabidopsis lyrata subsp. lyrata] >gi|297323185|gb|EFH53606.1| peptidyl-prolyl cis-trans isomerase cyclophilin-type family protein [Arabidopsis lyrata subsp		3	121	1.222			Unigene21947	comp26802_c0_seq1	-0.677845	0.544125
	CL9050.Contig1	3 818 putative nodulin [Arabidopsis thaliana]		6	128	0.655	*	-	CL9050.Contig1	comp25272_c0_seq1	1.45461	0.205076
	CL3666.Contig1	145 2760 hypoxia up-regulated 1 [Arabidopsis thaliana] >gi|378548353|sp|F4JMJ1.1|HSP7R_ARATH RecName: Full=Heat shock 70 kDa protein 17; AltName: Full=Heat shock protein 70-17; Short=AtHsp70-17; Flags: Precursor >gi|332658381|gb|AEE83781.1| hypox		14	380	2.094	*	+	CL3666.Contig1	comp30236_c0_seq2	-0.415636	0.745894
	Unigene2940	143 1153 minus strand nuclear pore complex protein Nup53 [Arabidopsis thaliana] >gi|332642275|gb|AEE75796.1| nuclear pore complex protein Nup53 [Arabidopsis thaliana]		9	479	0.991			Unigene2940	comp27880_c0_seq2	34.6287	3.92e-06	+
	CL5413.Contig1	375 722 minus strand phosphoenolpyruvate carboxylase [Brassica juncea]	CL5413.Contig2	6	217	1.696	*	+	CL5413.Contig1	comp24090_c0_seq1	0.998091	0.444977
	Unigene100	168 860 minus strand unnamed protein product [Thellungiella halophila]	CL9149.Contig1	2	91	0.701			Unigene100	comp27672_c0_seq1	0.0336617	1
	CL12169.Contig1	10 1446 lipoxygenase 2 [Brassica napus]		4	148	3.22	*	+	CL12169.Contig1	comp31744_c0_seq1	2.29803	0.00816597
	Unigene19013	174 611 Regulator of ribonuclease-like protein 3 [Arabidopsis thaliana] >gi|17368897|sp|Q9FH13.1|RRAA3_ARATH RecName: Full=Regulator of ribonuclease-like protein 3 >gi|9758753|dbj|BAB09117.1| S-adenosylmethionine:2-demethylmenaquinone methyltrans		4	134	0.476	*	-	Unigene19013	comp18681_c0_seq1	-31.8669	0.0489753
	CL4723.Contig1	144 839 calmodulin binding protein [Arabidopsis lyrata subsp. lyrata] >gi|297335522|gb|EFH65939.1| calmodulin binding protein [Arabidopsis lyrata subsp. lyrata]		4	156	0.728			CL4723.Contig1	comp24117_c0_seq1	-32.9181	0.0035335
	CL4256.Contig2	288 2456 minus strand ERD4 protein [Brassica juncea]		5	127	1.459			CL4256.Contig2	comp31968_c0_seq4	1.12038	0.215042
	CL3215.Contig1	92 796 unnamed protein product [Thellungiella halophila]		3	76	0.726	*	-	CL3215.Contig1	comp26184_c0_seq3	0.24691	0.947992
	Unigene24974	51 899 minus strand mppalpha [Arabidopsis lyrata subsp. lyrata] >gi|297328851|gb|EFH59270.1| mppalpha [Arabidopsis lyrata subsp. lyrata]		6	437	0.958			Unigene24974	comp24643_c0_seq1	-0.249997	0.90497
	CL8551.Contig3	254 2005 minus strand xylulose kinase [Arabidopsis lyrata subsp. lyrata] >gi|297309839|gb|EFH40263.1| xylulose kinase [Arabidopsis lyrata subsp. lyrata]	CL8551.Contig4	4	143	0.847			CL8551.Contig3	comp29828_c0_seq1	-0.28043	0.863883
	CL2035.Contig2	819 1529 hypothetical protein ARALYDRAFT_478309 [Arabidopsis lyrata subsp. lyrata] >gi|297328480|gb|EFH58899.1| hypothetical protein ARALYDRAFT_478309 [Arabidopsis lyrata subsp. lyrata]	CL2035.Contig4	15	325	1.318			CL2035.Contig2	comp29468_c1_seq4	-0.605273	0.764425
	CL835.Contig1	181 1416 minus strand nucleoporin 50 protein [Arabidopsis thaliana] >gi|14335002|gb|AAK59765.1| At1g52380/F19K6_4 [Arabidopsis thaliana] >gi|16323322|gb|AAL15374.1| At1g52380/F19K6_4 [Arabidopsis thaliana] >gi|332194676|gb|AEE32797.1| nucleopori	CL835.Contig2 CL835.Contig3 CL835.Contig4	11	280	0.952			CL835.Contig1	comp28124_c0_seq1	0.432559	0.743974
	Unigene24655	113 2485 minus strand RNA-dependent RNA polymerase 1 [Arabidopsis thaliana] >gi|75335341|sp|Q9LQV2.1|RDR1_ARATH RecName: Full=RNA-dependent RNA polymerase 1; Short=AtRDRP1; AltName: Full=RNA-directed RNA polymerase 1 >gi|8778232|gb|AAF79241.1|AC		3	84	2.417			Unigene24655	comp31654_c0_seq1	0.313178	0.859368
	Unigene25633	389 916 minus strand predicted protein [Arabidopsis lyrata subsp. lyrata] >gi|297340016|gb|EFH70433.1| predicted protein [Arabidopsis lyrata subsp. lyrata]		4	192	1.636			Unigene25633	comp29320_c2_seq11	0.754387	0.467027
	CL14460.Contig2	304 1590 SH3 domain-containing protein [Arabidopsis thaliana] >gi|16974676|gb|AAL32438.1|AF367773_1 SH3 domain-containing protein 1 [Arabidopsis thaliana] >gi|332193235|gb|AEE31356.1| SH3 domain-containing protein [Arabidopsis thaliana]		13	429	1.166			CL14460.Contig2	comp27970_c0_seq1	0.0173532	1
	CL3280.Contig5	205 2130 minus strand ubiquitin-like domain-containing protein [Arabidopsis thaliana] >gi|332006037|gb|AED93420.1| ubiquitin-like domain-containing protein [Arabidopsis thaliana]	CL3280.Contig7	4	87	0.646			CL3280.Contig5	comp18714_c0_seq1	-0.549534	0.647956
	CL7251.Contig1	96 656 temperature-induced lipocalin [Brassica napus]		9	91	0.71	*	-	CL7251.Contig1	comp22891_c0_seq1	-1.20836	0.239104
	CL6923.Contig1	162 1205 DNAJ heat shock family protein [Arabidopsis thaliana] >gi|20453120|gb|AAM19802.1| AT3g62600/F26K9_30 [Arabidopsis thaliana] >gi|21928031|gb|AAM78044.1| At3g62600/F26K9_30 [Arabidopsis thaliana] >gi|332646847|gb|AEE80368.1| DNAJ heat shoc	CL6923.Contig2	2	77	2.336			CL6923.Contig1	comp121853_c0_seq1	0.376603	1
	CL7265.Contig1	119 946 protein synthesis initiation factor eIF2 beta [Arabidopsis lyrata subsp. lyrata] >gi|297319860|gb|EFH50282.1| protein synthesis initiation factor eIF2 beta [Arabidopsis lyrata subsp. lyrata]		3	112	1.017			CL7265.Contig1	comp77455_c0_seq1	0.79164	0.780368
	Unigene19767	135 1397 minus strand fasciclin-like arabinogalactan protein 10 [Arabidopsis thaliana] >gi|38257776|sp|Q9LZX4.1|FLA10_ARATH RecName: Full=Fasciclin-like arabinogalactan protein 10; Flags: Precursor >gi|7329700|emb|CAB82694.1| endosperm specific		5	530	1.055			Unigene19767	comp22485_c0_seq4	-3.91102	0.00170418
	CL1350.Contig2	101 1357 minus strand mitogen-activaed protein kinase 4 [Brassica napus]	CL1350.Contig4 CL1350.Contig6	3	137	1.467			CL1350.Contig2	comp25723_c0_seq2	-0.297031	0.850864
	CL9573.Contig1	280 858 unnamed protein product [Thellungiella halophila]	CL9573.Contig2 CL9573.Contig3 CL9573.Contig4	3	101	0.884			CL9573.Contig1	comp27901_c1_seq3	0.32895	0.821569
	CL3437.Contig4	75 1814 hypothetical protein ARALYDRAFT_478791 [Arabidopsis lyrata subsp. lyrata] >gi|297330834|gb|EFH61253.1| hypothetical protein ARALYDRAFT_478791 [Arabidopsis lyrata subsp. lyrata]		3	166	1.512	*	+	CL3437.Contig4	comp33774_c0_seq1	-0.0602609	1
	Unigene16703	1 2001 TOC159 [Arabidopsis lyrata subsp. lyrata] >gi|297320747|gb|EFH51169.1| TOC159 [Arabidopsis lyrata subsp. lyrata]		2	71	1.178			Unigene16703	comp10052_c0_seq1	-0.436629	0.745894
	CL5357.Contig1	160 1263 minus strand cysteine synthase C1 [Arabidopsis thaliana] >gi|4996616|dbj|BAA78560.1| cysteine synthase [Arabidopsis thaliana] >gi|5824334|emb|CAB54830.1| cysteine synthase [Arabidopsis thaliana] >gi|6850835|emb|CAB71074.1| cysteine synt		8	85	0.807			CL5357.Contig1	comp32495_c0_seq1	-2.54544	0.00197994
	Unigene1280	1 1686 VHA-A3 [Arabidopsis lyrata subsp. lyrata] >gi|297312666|gb|EFH43089.1| VHA-A3 [Arabidopsis lyrata subsp. lyrata]		4	163	2.011			Unigene1280	comp32193_c0_seq1	0.00125013	1
	Unigene10775	15 962 predicted protein [Arabidopsis lyrata subsp. lyrata] >gi|297323111|gb|EFH53532.1| predicted protein [Arabidopsis lyrata subsp. lyrata]		4	107	1.611			Unigene10775	comp32048_c0_seq1	-0.182834	0.934475
	Unigene26305	29 1381 unnamed protein product [Thellungiella halophila]		3	172	1.278			Unigene26305	comp24235_c0_seq1	-1.21267	0.175045
	Unigene24922	51 1115 translocation protein SEC62 [Arabidopsis thaliana] >gi|332642919|gb|AEE76440.1| translocation protein SEC62 [Arabidopsis thaliana]		2	76	1.961	*	+	Unigene24922	comp28080_c0_seq1	0.194915	0.930707
	CL12333.Contig2	93 452 minus strand adenylosuccinate synthetase [Arabidopsis thaliana] >gi|2500026|sp|Q96529.1|PURA_ARATH RecName: Full=Adenylosuccinate synthetase, chloroplastic; Short=AMPSase; Short=AdSS; AltName: Full=IMP--aspartate ligase; Flags: Precursor		4	248	0.596	*	-	CL12333.Contig2	comp25625_c0_seq2	-0.0563565	1
	CL10513.Contig1	4 1332 hypothetical protein ARALYDRAFT_488521 [Arabidopsis lyrata subsp. lyrata] >gi|297317564|gb|EFH47986.1| hypothetical protein ARALYDRAFT_488521 [Arabidopsis lyrata subsp. lyrata]	CL10513.Contig2 CL10513.Contig3	21	626	0.793	*	-	CL10513.Contig1	comp30422_c0_seq2	-1.22731	0.606426
	CL7823.Contig2	140 478 PREDICTED: chaperonin CPN60-2, mitochondrial isoform 1 [Vitis vinifera] >gi|297741894|emb|CBI33329.3| unnamed protein product [Vitis vinifera]		5	130	0.737			CL7823.Contig2	comp29187_c0_seq2	3.58684	0.000240386	+
	CL1095.Contig1	452 1381 minus strand hypothetical protein ARALYDRAFT_491566 [Arabidopsis lyrata subsp. lyrata] >gi|297313117|gb|EFH43540.1| hypothetical protein ARALYDRAFT_491566 [Arabidopsis lyrata subsp. lyrata]	CL1095.Contig3 CL1095.Contig4 CL1095.Contig5 CL1095.Contig6 CL1095.Contig7 CL1095.Contig8 CL1095.Contig9	5	146	0.726			CL1095.Contig1	comp31460_c3_seq7	34.5688	4.94e-06	+
	Unigene8583	2 493 unnamed protein product [Thellungiella halophila]		2	123	0.845			Unigene8583	comp38748_c0_seq1	-0.0384346	1
	CL7503.Contig3	109 900 minus strand unnamed protein product [Thellungiella halophila]		4	105	0.453			CL7503.Contig3	comp22307_c0_seq1	-31.1817	0.205076
	CL13485.Contig1	2 1273 translocon outer membrane complex 75-III [Arabidopsis lyrata subsp. lyrata] >gi|297323349|gb|EFH53770.1| translocon outer membrane complex 75-III [Arabidopsis lyrata subsp. lyrata]		3	123	0.9			CL13485.Contig1	comp28797_c0_seq2	31.8436	0.0489753
	CL13025.Contig1	201 497 minus strand small ubiquitin-related modifier 1 [Arabidopsis thaliana] >gi|21542462|sp|P55852.2|SUMO1_ARATH RecName: Full=Small ubiquitin-related modifier 1; Short=AtSUMO1; AltName: Full=Ubiquitin-like protein SMT3 >gi|4455207|emb|CAB365		3	180	1.785			CL13025.Contig1	comp22518_c0_seq2	1.65809	0.061322
	Unigene1776	2 988 hypothetical protein ARALYDRAFT_910342 [Arabidopsis lyrata subsp. lyrata] >gi|297319960|gb|EFH50382.1| hypothetical protein ARALYDRAFT_910342 [Arabidopsis lyrata subsp. lyrata]		5	101	1.091			Unigene1776	comp26205_c0_seq2	2.94158	0.0282691
	CL7823.Contig1	1 1359 hypothetical protein ARALYDRAFT_898985 [Arabidopsis lyrata subsp. lyrata] >gi|297331464|gb|EFH61883.1| hypothetical protein ARALYDRAFT_898985 [Arabidopsis lyrata subsp. lyrata]		33	1331	0.928			CL7823.Contig1	comp109242_c0_seq1	-1.20836	0.889098
	CL8142.Contig5	141 974 unknown [Arabidopsis thaliana]	Unigene28080	4	76	1.298			CL8142.Contig5	comp28642_c0_seq1	-0.398293	0.831275
	CL1226.Contig4	128 1477 minus strand tubulin beta-2/beta-3 chain [Arabidopsis thaliana] >gi|18424622|ref|NP_568960.1| tubulin beta-2/beta-3 chain [Arabidopsis thaliana] >gi|267073|sp|P29512.1|TBB2_ARATH RecName: Full=Tubulin beta-2/beta-3 chain >gi|166898|gb|A		2	1745	1.565			CL1226.Contig4	comp29327_c0_seq2	2.35508	0.00540974
	CL1840.Contig1	163 606 minus strand ubiquitin-conjugating enzyme E2 11 [Arabidopsis thaliana] >gi|334185174|ref|NP_001189841.1| ubiquitin-conjugating enzyme E2 11 [Arabidopsis thaliana] >gi|297829396|ref|XP_002882580.1| ubiquitin-conjugating enzyme 11 [Arabido		2	35	0.975			CL1840.Contig1	comp19081_c0_seq2	-33.4662	0.000570552	-
	CL1180.Contig12	99 2012 minus strand NADP-malic enzyme 2 [Arabidopsis lyrata subsp. lyrata] >gi|297317323|gb|EFH47745.1| NADP-malic enzyme 2 [Arabidopsis lyrata subsp. lyrata]	CL1180.Contig16 CL1180.Contig17 CL1180.Contig22 CL1180.Contig11 CL1180.Contig15	6	1407	0.71	*	-	CL1180.Contig12	comp17336_c0_seq1	2.96157	0.0464872
	CL5893.Contig1	131 1621 minus strand glutathione reductase [Brassica oleracea]		12	445	1.265	*	+	CL5893.Contig1	comp23801_c1_seq3	-0.309737	0.938384
	Unigene8820	3 956 minus strand hypothetical protein ARALYDRAFT_314445 [Arabidopsis lyrata subsp. lyrata] >gi|297340101|gb|EFH70518.1| hypothetical protein ARALYDRAFT_314445 [Arabidopsis lyrata subsp. lyrata]		2	48	1.086			Unigene8820	comp30842_c2_seq1	-0.270674	0.888315
	Unigene23037	155 1342 minus strand 3-deoxy-D-arabino-heptulosonate 7-phosphate synthase [Arabidopsis lyrata subsp. lyrata] >gi|297315048|gb|EFH45471.1| 3-deoxy-D-arabino-heptulosonate 7-phosphate synthase [Arabidopsis lyrata subsp. lyrata]		2	147	0.992			Unigene23037	comp23273_c0_seq1	-1.2077	0.330468
	CL7579.Contig1	80 232 minus strand acyl-CoA synthetase [Brassica napus]	CL7579.Contig2 Unigene21330	2	39	1.163			CL7579.Contig1	comp27382_c0_seq1	-6.31688	1.47e-07	-
	CL1251.Contig1	3 1718 minus strand acyl-CoA binding protein 4, acyl-CoA-binding domain 4 [Arabidopsis lyrata subsp. lyrata] >gi|297328252|gb|EFH58671.1| acyl-CoA binding protein 4, acyl-CoA-binding domain 4 [Arabidopsis lyrata subsp. lyrata]		2	56	1.41			CL1251.Contig1	comp30399_c0_seq1	0.789049	0.443609
	CL6247.Contig1	84 416 hypothetical protein ARALYDRAFT_481315 [Arabidopsis lyrata subsp. lyrata] >gi|297324609|gb|EFH55029.1| hypothetical protein ARALYDRAFT_481315 [Arabidopsis lyrata subsp. lyrata]		2	169	1.147			CL6247.Contig1	comp21644_c0_seq1	0.929144	0.650152
	CL9056.Contig2	45 683 germin-like protein subfamily T member 2 [Arabidopsis thaliana] >gi|18203242|sp|Q9LMC9.1|GLT2_ARATH RecName: Full=Germin-like protein subfamily T member 2; Flags: Precursor >gi|8778294|gb|AAF79303.1|AC068602_26 F14D16.13 [Arabidopsis thali		2	106	0.509			CL9056.Contig2	comp36099_c0_seq1	-1.97703	0.0335972
	CL14276.Contig2	8 1222 minus strand polygalacturonase [Arabidopsis thaliana] >gi|332192268|gb|AEE30389.1| polygalacturonase [Arabidopsis thaliana]		2	113	0.518			CL14276.Contig2	comp29808_c0_seq2	-33.1407	0.00170759
	Unigene21212	10 1017 6-phosphogluconate dehydrogenase NAD-binding domain-containing protein [Arabidopsis lyrata subsp. lyrata] >gi|297315287|gb|EFH45710.1| 6-phosphogluconate dehydrogenase NAD-binding domain-containing protein [Arabidopsis lyrata subsp. lyrat		6	89	0.724			Unigene21212	comp28472_c1_seq1	-0.40428	0.767279
	Unigene18535	59 982 minus strand betaine aldehyde dehydrogenase 1 [Arabidopsis thaliana] >gi|332197529|gb|AEE35650.1| betaine aldehyde dehydrogenase 1 [Arabidopsis thaliana]		3	84	0.722			Unigene18535	comp9264_c0_seq1	32.4587	0.0136901
	CL12269.Contig1	172 1602 minus strand glycoside hydrolase family 28 protein [Arabidopsis lyrata subsp. lyrata] >gi|297322456|gb|EFH52877.1| glycoside hydrolase family 28 protein [Arabidopsis lyrata subsp. lyrata]	CL12269.Contig2	7	192	0.502	*	-	CL12269.Contig1	comp28477_c0_seq1	2.62195	0.00174785
	CL4788.Contig1	211 2112 minus strand 10-formyltetrahydrofolate synthetase [Arabidopsis lyrata subsp. lyrata] >gi|297337420|gb|EFH67837.1| 10-formyltetrahydrofolate synthetase [Arabidopsis lyrata subsp. lyrata]		41	1005	1.211	*	+	CL4788.Contig1	comp30983_c0_seq1	-0.877055	0.353433
	CL10658.Contig1	94 963 GTP binding protein [Arabidopsis lyrata subsp. lyrata] >gi|297339476|gb|EFH69893.1| GTP binding protein [Arabidopsis lyrata subsp. lyrata]	CL10658.Contig2	9	164	1.716	*	+	CL10658.Contig1	comp23915_c0_seq1	0.79164	0.780368
	Unigene17115	32 607 minus strand predicted protein [Arabidopsis lyrata subsp. lyrata] >gi|297336446|gb|EFH66863.1| predicted protein [Arabidopsis lyrata subsp. lyrata]		5	96	1.181			Unigene17115	comp14431_c0_seq1	-0.090708	1
	Unigene27308	129 1187 minus strand peroxidase 34 [Arabidopsis thaliana] >gi|25453220|sp|Q9SMU8.1|PER34_ARATH RecName: Full=Peroxidase 34; Short=Atperox P34; AltName: Full=ATPCb; Flags: Precursor >gi|16930431|gb|AAL31901.1|AF419569_1 AT3g49120/T2J13_40 [Arabi		2	186	0.097			Unigene27308	comp18969_c1_seq1	-5.33963	1.22e-08	-
	CL741.Contig1	308 1387 minus strand nuclear RNA binding protein, putative [Brassica oleracea]		4	386	1.539	*	+	CL741.Contig1	comp22225_c0_seq1	-0.623397	0.746244
	CL1226.Contig8	2 889 minus strand tubulin beta-4 chain [Arabidopsis lyrata subsp. lyrata] >gi|297309423|gb|EFH39847.1| tubulin beta-4 chain [Arabidopsis lyrata subsp. lyrata]		15	1164	1.16			CL1226.Contig8	comp29546_c0_seq5	31.6074	0.0974087
	CL14248.Contig1	104 790 hypothetical protein ARALYDRAFT_488610 [Arabidopsis lyrata subsp. lyrata] >gi|297317603|gb|EFH48025.1| hypothetical protein ARALYDRAFT_488610 [Arabidopsis lyrata subsp. lyrata]	CL14248.Contig2	2	82	1.261			CL14248.Contig1	comp29650_c0_seq9	-31.3113	0.139691
	CL14470.Contig1	109 1179 minus strand unnamed protein product [Thellungiella halophila]		6	169	0.542	*	-	CL14470.Contig1	comp20634_c0_seq3	0.097627	1
	CL2318.Contig1	41 1801 minus strand unnamed protein product [Thellungiella halophila]		10	307	0.723	*	-	CL2318.Contig1	comp25716_c0_seq2	-0.865673	0.609414
	Unigene8105	241 1863 minus strand synaptotagmin A [Arabidopsis thaliana] >gi|20197686|gb|AAM15203.1| expressed protein [Arabidopsis thaliana] >gi|20197724|gb|AAD29817.2| expressed protein [Arabidopsis thaliana] >gi|31071599|dbj|BAC76812.1| synaptotagmin A [		16	342	1.922	*	+	Unigene8105	comp89_c0_seq1	-31.6671	0.0974087
	CL394.Contig1	136 1368 uncharacterized protein [Arabidopsis thaliana] >gi|3128168|gb|AAC16072.1| expressed protein [Arabidopsis thaliana] >gi|15081719|gb|AAK82514.1| At2g44210/F4I1.2 [Arabidopsis thaliana] >gi|22137094|gb|AAM91392.1| At2g44210/F4I1.2 [Arabidop	CL394.Contig2 CL394.Contig3	3	76	0.118			CL394.Contig1	comp30093_c0_seq1	3.01015	0.0044526
	CL5159.Contig1	337 2553 minus strand monosaccharide-sensing protein 2 [Arabidopsis thaliana] >gi|334187185|ref|NP_001190923.1| monosaccharide-sensing protein 2 [Arabidopsis thaliana] >gi|20453189|gb|AAM19835.1| AT4g35300/F23E12_140 [Arabidopsis thaliana] >gi|3	CL5159.Contig2	5	185	1.784	*	+	CL5159.Contig1	comp25635_c0_seq4	-1.11448	0.418497
	CL10018.Contig1	197 961 chaperonin 20 [Arabidopsis thaliana] >gi|30687936|ref|NP_851045.1| chaperonin 20 [Arabidopsis thaliana] >gi|334187803|ref|NP_001190350.1| chaperonin 20 [Arabidopsis thaliana] >gi|12643263|sp|O65282.2|CH10C_ARATH RecName: Full=20 kDa chape		13	737	1.159			CL10018.Contig1	comp26632_c0_seq2	-0.715885	0.821569
	CL248.Contig1	96 1070 hypothetical protein ARALYDRAFT_488833 [Arabidopsis lyrata subsp. lyrata] >gi|297317722|gb|EFH48144.1| hypothetical protein ARALYDRAFT_488833 [Arabidopsis lyrata subsp. lyrata]	CL248.Contig2	8	233	1.013			CL248.Contig1	comp17896_c0_seq1	3.79164	0.0299205
	Unigene22956	33 668 minus strand unknown [Arabidopsis thaliana]		2	51	0.685			Unigene22956	comp28997_c0_seq9	-0.817279	0.479281
	CL14023.Contig1	75 467 profilin 1 [Arabidopsis thaliana] >gi|2499810|sp|Q42449.1|PROF1_ARATH RecName: Full=Profilin-1; AltName: Allergen=Ara t 8 >gi|157829634|pdb|1A0K|A Chain A, Profilin I From Arabidopsis Thaliana >gi|9965575|gb|AAG10090.1|U43593_1 profilin [A		23	766	0.731	*	-	CL14023.Contig1	comp23045_c0_seq2	-0.826669	0.439405
	CL10159.Contig3	3 515 minus strand EMB2221 [Arabidopsis lyrata subsp. lyrata] >gi|297324356|gb|EFH54777.1| EMB2221 [Arabidopsis lyrata subsp. lyrata]		4	66	0.955			CL10159.Contig3	comp27524_c0_seq2	0.710592	0.565875
	CL4587.Contig2	121 1581 unnamed protein product [Thellungiella halophila]		2	84	1.112			CL4587.Contig2	comp25160_c1_seq1	-0.693786	0.948145
	CL369.Contig2	127 1197 cinnamyl alcohol dehydrogenase 5 [Arabidopsis thaliana] >gi|13626131|sp|O49482.1|CADH5_ARATH RecName: Full=Cinnamyl alcohol dehydrogenase 5; Short=AtCAD5; AltName: Full=Cinnamyl alcohol dehydrogenase D >gi|134104089|pdb|2CF5|A Chain A, C		6	80	1.894	*	+	CL369.Contig2	comp27417_c1_seq1	2.22404	0.0105084
	Unigene21324	144 971 hydroxyproline-rich glycoprotein family protein [Arabidopsis lyrata subsp. lyrata] >gi|297327072|gb|EFH57492.1| hydroxyproline-rich glycoprotein family protein [Arabidopsis lyrata subsp. lyrata]		2	125	0.535			Unigene21324	comp30152_c0_seq2	-32.3995	0.0184434
	Unigene12598	1 1641 minus strand hypothetical protein ARALYDRAFT_496963 [Arabidopsis lyrata subsp. lyrata] >gi|297310905|gb|EFH41329.1| hypothetical protein ARALYDRAFT_496963 [Arabidopsis lyrata subsp. lyrata]		5	175	1			Unigene12598	comp27826_c0_seq1	-0.579763	0.726169
	CL574.Contig4	193 1170 hypothetical protein ARALYDRAFT_480987 [Arabidopsis lyrata subsp. lyrata] >gi|297324380|gb|EFH54800.1| hypothetical protein ARALYDRAFT_480987 [Arabidopsis lyrata subsp. lyrata]	CL574.Contig5 CL574.Contig6	6	94	0.6	*	-	CL574.Contig4	comp27993_c0_seq2	-0.622368	0.583844
	Unigene659	153 557 60S ribosomal protein L27-3 [Arabidopsis thaliana] >gi|3123264|sp|P51419.2|RL273_ARATH RecName: Full=60S ribosomal protein L27-3 >gi|2244857|emb|CAB10279.1| ribosomal protein [Arabidopsis thaliana] >gi|7268246|emb|CAB78542.1| ribosomal pr	Unigene1818	6	183	1.553			Unigene659	comp69751_c0_seq1	-0.693786	0.707192
	CL4556.Contig1	2 2365 minus strand hypothetical protein ARALYDRAFT_475134 [Arabidopsis lyrata subsp. lyrata] >gi|297333882|gb|EFH64300.1| hypothetical protein ARALYDRAFT_475134 [Arabidopsis lyrata subsp. lyrata]		16	368	1.541	*	+	CL4556.Contig1	comp32141_c0_seq1	0.546564	0.694192
	CL11205.Contig1	55 657 ripening-related protein-like [Arabidopsis thaliana]	CL11205.Contig2	4	109	0.583			CL11205.Contig1	comp9333_c0_seq1	-2.26725	0.0489753
	CL2084.Contig1	268 4170 minus strand translation initiation factor eIF-5B [Arabidopsis thaliana] >gi|332197770|gb|AEE35891.1| translation initiation factor eIF-5B [Arabidopsis thaliana]	CL2084.Contig2 CL2084.Contig3 CL2084.Contig4	9	280	1.233			CL2084.Contig1	comp32115_c0_seq4	32.1496	0.0251893
	CL1817.Contig3	2 1222 minus strand hypothetical protein ARALYDRAFT_891950 [Arabidopsis lyrata subsp. lyrata] >gi|297340080|gb|EFH70497.1| hypothetical protein ARALYDRAFT_891950 [Arabidopsis lyrata subsp. lyrata]		4	192	0.651			CL1817.Contig3	comp36_c0_seq1	-2.20836	0.643979
	CL10532.Contig1	87 824 hypothetical protein ARALYDRAFT_478525 [Arabidopsis lyrata subsp. lyrata] >gi|297328587|gb|EFH59006.1| hypothetical protein ARALYDRAFT_478525 [Arabidopsis lyrata subsp. lyrata]	CL10532.Contig2	2	93	1.002			CL10532.Contig1	comp25321_c0_seq2	-1.13954	0.205658
	Unigene346	426 1661 minus strand hypothetical protein ARALYDRAFT_490272 [Arabidopsis lyrata subsp. lyrata] >gi|297320727|gb|EFH51149.1| hypothetical protein ARALYDRAFT_490272 [Arabidopsis lyrata subsp. lyrata]	Unigene347 Unigene348 Unigene1916 Unigene1917 Unigene1918 Unigene2196 Unigene2197 Unigene2198	3	115	0.709			Unigene346	comp31462_c1_seq1	-1.04235	0.308033
	CL7338.Contig1	111 1034 minus strand 26S proteasome non-ATPase regulatory subunit 14 [Arabidopsis thaliana] >gi|51701846|sp|Q9LT08.1|PSDE_ARATH RecName: Full=26S proteasome non-ATPase regulatory subunit 14; AltName: Full=26S proteasome regulatory subunit rpn11	CL7338.Contig2	4	110	1.209			CL7338.Contig1	comp22910_c0_seq2	-0.041712	1
	CL6501.Contig1	138 761 minus strand Ras-related protein RABH1B [Arabidopsis thaliana] >gi|75318653|sp|O80501.1|RAH1B_ARATH RecName: Full=Ras-related protein RABH1b; Short=AtRABH1b; AltName: Full=Ras-related protein Rab6A; Short=AtRab6A >gi|107738267|gb|ABF8367	CL6501.Contig2 CL6501.Contig3	8	203	1.478	*	+	CL6501.Contig1	comp29337_c0_seq2	2.24939	0.0200085
	CL9871.Contig1	132 569 minus strand DnaQ-like exonuclease domain-containing protein [Arabidopsis thaliana] >gi|73921148|sp|Q9FNG3.1|Y5645_ARATH RecName: Full=Uncharacterized protein At5g06450 >gi|332003636|gb|AED91019.1| DnaQ-like exonuclease domain-containing	CL9871.Contig2	2	138	0.688			CL9871.Contig1	comp14426_c0_seq1	-2.5287	0.0355148
	CL14118.Contig1	10 2400 minus strand DNA topoisomerase 2-associated protein PAT1 [Arabidopsis thaliana] >gi|30699394|ref|NP_849904.1| DNA topoisomerase 2-associated protein PAT1 [Arabidopsis thaliana] >gi|227202670|dbj|BAH56808.1| AT1G79090 [Arabidopsis thalian	CL14118.Contig2	3	76	0.847			CL14118.Contig1	comp31174_c0_seq4	35.4052	9.33e-08	+
	CL11809.Contig1	3 2942 minus strand translocase of chloroplast 120 [Arabidopsis thaliana] >gi|75274287|sp|Q9LUS2.1|TC120_ARATH RecName: Full=Translocase of chloroplast 120, chloroplastic; Short=AtToc120; AltName: Full=120 kDa chloroplast outer envelope protein		3	143	0.798			CL11809.Contig1	comp15548_c0_seq2	-1.01571	0.504981
	CL6220.Contig1	395 1075 minus strand 26S proteasome non-ATPase regulatory subunit 9; K06693 26S proteasome non-ATPase regulatory subunit 9	CL6220.Contig2	6	183	1.446			CL6220.Contig1	comp22632_c0_seq1	-0.458384	0.738923
	CL1008.Contig1	101 1252 hypothetical protein ARALYDRAFT_492871 [Arabidopsis lyrata subsp. lyrata] >gi|297313733|gb|EFH44156.1| hypothetical protein ARALYDRAFT_492871 [Arabidopsis lyrata subsp. lyrata]		5	214	1.006			CL1008.Contig1	comp28793_c0_seq1	0.236459	0.914985
	CL13005.Contig1	111 1070 minus strand T14P8.15 [Arabidopsis thaliana] >gi|7268994|emb|CAB80727.1| AT4g02340 [Arabidopsis thaliana] >gi|20856515|gb|AAM26670.1| AT4g02340/T14P8_15 [Arabidopsis thaliana] >gi|23308303|gb|AAN18121.1| At4g02340/T14P8_15 [Arabidopsis		2	53	1.336	*	+	CL13005.Contig1	comp28355_c2_seq2	-1.77715	0.356889
	Unigene25868	164 1261 minus strand fasciclin-like arabinogalactan protein 4 [Arabidopsis thaliana] >gi|75206907|sp|Q9SNC3.1|FLA4_ARATH RecName: Full=Fasciclin-like arabinogalactan protein 4; AltName: Full=Protein SALT OVERLY SENSITIVE 5; Flags: Precursor >gi		2	100	0.483			Unigene25868	comp27798_c0_seq1	2.47112	0.00541557
	Unigene25514	3 701 minus strand ATSCO1/ATSCO1/CPEF-G [Arabidopsis lyrata subsp. lyrata] >gi|297332298|gb|EFH62716.1| ATSCO1/ATSCO1/CPEF-G [Arabidopsis lyrata subsp. lyrata]		2	69	1.242			Unigene25514	comp9797_c0_seq1	0.118481	0.979994
	CL89.Contig1	1 4497 minus strand hypothetical protein ARALYDRAFT_907545 [Arabidopsis lyrata subsp. lyrata] >gi|297322380|gb|EFH52801.1| hypothetical protein ARALYDRAFT_907545 [Arabidopsis lyrata subsp. lyrata]		18	527	1.258	*	+	CL89.Contig1	comp29482_c1_seq1	31.8794	0.0489753
	CL1920.Contig2	5 547 hypothetical protein ARALYDRAFT_479163 [Arabidopsis lyrata subsp. lyrata] >gi|297331019|gb|EFH61438.1| hypothetical protein ARALYDRAFT_479163 [Arabidopsis lyrata subsp. lyrata]		2	81	0.738			CL1920.Contig2	comp31390_c0_seq1	0.767562	0.490332
	Unigene8133	94 1389 minus strand leucine-rich repeat family protein [Arabidopsis lyrata subsp. lyrata] >gi|297329298|gb|EFH59717.1| leucine-rich repeat family protein [Arabidopsis lyrata subsp. lyrata]		5	122	0.713	*	-	Unigene8133	comp25640_c0_seq1	-2.57759	0.02079
	Unigene20278	2 961 fumarate hydratase, class II [Arabidopsis thaliana] >gi|145331433|ref|NP_001078075.1| fumarate hydratase, class II [Arabidopsis thaliana] >gi|39931311|sp|P93033.2|FUM1_ARATH RecName: Full=Fumarate hydratase 1, mitochondrial; Short=Fumarase		10	301	0.569	*	-	Unigene20278	comp29761_c1_seq4	-1.86422	0.0254223
	CL4212.Contig1	2 598 ribonucleoprotein like protein [Arabidopsis thaliana] >gi|7268135|emb|CAB78472.1| ribonucleoprotein like protein [Arabidopsis thaliana]		4	357	1.534			CL4212.Contig1	comp17613_c0_seq4	30.9905	0.205076
	CL14463.Contig1	3 1184 glycosyl hydrolase family 17 protein [Arabidopsis lyrata subsp. lyrata] >gi|297330482|gb|EFH60901.1| glycosyl hydrolase family 17 protein [Arabidopsis lyrata subsp. lyrata]	CL14463.Contig2	12	263	0.657	*	-	CL14463.Contig1	comp24695_c0_seq1	4.07486	6.51e-06	+
	Unigene8719	6 1733 minus strand predicted protein [Arabidopsis lyrata subsp. lyrata] >gi|297315905|gb|EFH46328.1| predicted protein [Arabidopsis lyrata subsp. lyrata]		2	137	0.691			Unigene8719	comp30947_c0_seq1	0.0904551	0.997274
	CL647.Contig2	243 2111 minus strand ATEXO70H7 [Arabidopsis lyrata subsp. lyrata] >gi|297312179|gb|EFH42603.1| ATEXO70H7 [Arabidopsis lyrata subsp. lyrata]	CL647.Contig3	4	45	1.157			CL647.Contig2	comp12676_c0_seq1	-3.77604	0.000170354	-
	CL1162.Contig1	90 1076 minus strand hypothetical protein [Arabidopsis thaliana]		7	317	1.183			CL1162.Contig1	comp29745_c0_seq5	-2.94848	0.0847435
	CL4301.Contig1	230 1939 minus strand FAD-binding domain-containing protein [Arabidopsis lyrata subsp. lyrata] >gi|297315760|gb|EFH46183.1| FAD-binding domain-containing protein [Arabidopsis lyrata subsp. lyrata]	CL4301.Contig3	6	157	1.046			CL4301.Contig1	comp26108_c0_seq1	-2.93911	0.000495339	-
	CL6280.Contig2	3 983 arginine biosynthesis bifunctional protein ArgJ [Arabidopsis thaliana] >gi|330254315|gb|AEC09409.1| arginine biosynthesis bifunctional protein ArgJ [Arabidopsis thaliana]		2	89	0.588			CL6280.Contig2	comp26434_c0_seq2	3.372	0.0365837
	Unigene8320	62 610 unnamed protein product [Thellungiella halophila]		11	260	0.41	*	-	Unigene8320	comp34257_c0_seq1	-0.476293	0.707192
	CL4672.Contig3	50 1543 minus strand beta-amylase [Raphanus sativus]		43	1474	1.322	*	+	CL4672.Contig3	comp33288_c0_seq1	36.0177	3.96e-09	+
	CL10887.Contig1	4 1365 minus strand glycine hydroxymethyltransferase (EC 2.1.2.1)-like protein [Arabidopsis thaliana] >gi|7270156|emb|CAB79969.1| glycine hydroxymethyltransferase (EC 2.1.2.1)-like protein [Arabidopsis thaliana]		6	84	0.701			CL10887.Contig1	comp29174_c0_seq1	-0.518215	0.666725
	CL826.Contig1	141 908 minus strand fasciclin-like arabinogalactan protein 7 [Arabidopsis thaliana] >gi|30678131|ref|NP_849935.1| fasciclin-like arabinogalactan protein 7 [Arabidopsis thaliana] >gi|38257788|sp|Q9SJ81.1|FLA7_ARATH RecName: Full=Fasciclin-like a	CL826.Contig2	21	599	1.063			CL826.Contig1	comp12764_c0_seq1	4.20587	1.1e-06	+
	CL4673.Contig1	90 1073 minus strand hypothetical protein ARALYDRAFT_470455 [Arabidopsis lyrata subsp. lyrata] >gi|297335362|gb|EFH65779.1| hypothetical protein ARALYDRAFT_470455 [Arabidopsis lyrata subsp. lyrata]	Unigene28424	5	111	0.952			CL4673.Contig1	comp29157_c0_seq1	-0.0212551	1
	CL5418.Contig2	75 1577 hypothetical protein ARALYDRAFT_474678 [Arabidopsis lyrata subsp. lyrata] >gi|297340401|gb|EFH70818.1| hypothetical protein ARALYDRAFT_474678 [Arabidopsis lyrata subsp. lyrata]		7	264	1.899	*	+	CL5418.Contig2	comp23682_c0_seq1	-0.886431	0.582826
	Unigene8268	1 303 hypothetical protein ARALYDRAFT_474037 [Arabidopsis lyrata subsp. lyrata] >gi|297337305|gb|EFH67722.1| hypothetical protein ARALYDRAFT_474037 [Arabidopsis lyrata subsp. lyrata]		2	95	1.259			Unigene8268	comp4548_c0_seq1	-3.53029	0.0847435
	CL1545.Contig2	266 1219 binding to TOMV RNA 1L (long form) protein [Arabidopsis thaliana] >gi|14030641|gb|AAK52995.1|AF375411_1 AT5g04430/T32M21_30 [Arabidopsis thaliana] >gi|23507775|gb|AAN38691.1| At5g04430/T32M21_30 [Arabidopsis thaliana] >gi|332003361|gb|AE	CL1545.Contig3	22	399	0.938			CL1545.Contig2	comp14549_c0_seq1	0.698531	0.774189
	Unigene8530	23 655 copper/zinc superoxide dismutase [Arabidopsis lyrata subsp. lyrata] >gi|297326784|gb|EFH57204.1| copper/zinc superoxide dismutase [Arabidopsis lyrata subsp. lyrata]		12	823	1.242			Unigene8530	comp34899_c0_seq1	-1.0675	0.257553
	Unigene16824	2 508 hypothetical protein ARALYDRAFT_909245 [Arabidopsis lyrata subsp. lyrata] >gi|297317373|gb|EFH47795.1| hypothetical protein ARALYDRAFT_909245 [Arabidopsis lyrata subsp. lyrata]		2	54	0.999			Unigene16824	comp30580_c0_seq2	3.47218	0.00781322
	Unigene27210	174 692 minus strand AT2G47510 [Arabidopsis thaliana]		12	388	0.679	*	-	Unigene27210	comp34489_c0_seq1	-0.903505	0.460099
	Unigene2014	127 486 minus strand peroxidase precursor [Raphanus sativus var. niger]		3	92	0.63	*	-	Unigene2014	comp23002_c0_seq3	0.494819	0.760319
	CL13302.Contig1	12 470 uncharacterized protein [Arabidopsis thaliana] >gi|30698059|ref|NP_851270.1| uncharacterized protein [Arabidopsis thaliana] >gi|332010553|gb|AED97936.1| uncharacterized protein [Arabidopsis thaliana] >gi|332010554|gb|AED97937.1| uncharacte		6	87	0.606	*	-	CL13302.Contig1	comp27653_c0_seq1	-0.845789	0.549502
	Unigene12935	86 403 minus strand hypothetical protein ARALYDRAFT_894747 [Arabidopsis lyrata subsp. lyrata] >gi|297333089|gb|EFH63507.1| hypothetical protein ARALYDRAFT_894747 [Arabidopsis lyrata subsp. lyrata]		2	97	1.741			Unigene12935	comp31638_c0_seq3	-0.865647	0.779355
	CL12994.Contig1	78 584 minus strand 4-phosphopantetheine adenylyltransferase [Arabidopsis lyrata subsp. lyrata] >gi|297329963|gb|EFH60382.1| 4-phosphopantetheine adenylyltransferase [Arabidopsis lyrata subsp. lyrata]		2	59	1.223			CL12994.Contig1	comp28138_c2_seq1	31.5925	0.0974087
	CL8788.Contig1	126 1409 hypothetical protein ARALYDRAFT_328390 [Arabidopsis lyrata subsp. lyrata] >gi|297313011|gb|EFH43434.1| hypothetical protein ARALYDRAFT_328390 [Arabidopsis lyrata subsp. lyrata]		2	69	1.073			CL8788.Contig1	comp25950_c0_seq1	33.3221	0.000872686	+
	CL2603.Contig2	83 1357 hypothetical protein ARALYDRAFT_484564 [Arabidopsis lyrata subsp. lyrata] >gi|297322908|gb|EFH53329.1| hypothetical protein ARALYDRAFT_484564 [Arabidopsis lyrata subsp. lyrata]		13	253	0.759	*	-	CL2603.Contig2	comp28515_c0_seq1	0.41634	0.753877
	CL2706.Contig1	184 645 ferredoxin 3 [Arabidopsis thaliana] >gi|75338854|sp|Q9ZQG8.1|FER3_ARATH RecName: Full=Ferredoxin-3, chloroplastic; Short=AtFd3; Flags: Precursor >gi|330252914|gb|AEC08008.1| ferredoxin 3 [Arabidopsis thaliana]	CL2706.Contig2	5	151	1.127			CL2706.Contig1	comp28956_c0_seq3	0.0850503	1
	CL13814.Contig1	127 1866 DC1 domain-containing protein [Arabidopsis lyrata subsp. lyrata] >gi|297333984|gb|EFH64402.1| DC1 domain-containing protein [Arabidopsis lyrata subsp. lyrata]	CL13814.Contig2	8	287	3.011	*	+	CL13814.Contig1	comp29926_c0_seq1	-1.27076	0.143706
	CL763.Contig4	141 2444 hypothetical protein ARALYDRAFT_330172 [Arabidopsis lyrata subsp. lyrata] >gi|297314246|gb|EFH44669.1| hypothetical protein ARALYDRAFT_330172 [Arabidopsis lyrata subsp. lyrata]		2	89	0.724			CL763.Contig4	comp29973_c0_seq1	-1.40224	0.124914
	CL747.Contig1	143 2491 sucrose synthase 3 [Arabidopsis thaliana] >gi|15982721|gb|AAL09730.1| AT4g02280/T2H3_8 [Arabidopsis thaliana] >gi|332656750|gb|AEE82150.1| sucrose synthase 3 [Arabidopsis thaliana]	CL747.Contig2 CL747.Contig3 CL747.Contig4	3	71	2.258	*	+	CL747.Contig1	comp32101_c0_seq5	1.24164	0.292894
	CL1387.Contig1	39 770 minus strand hypothetical protein ARALYDRAFT_474808 [Arabidopsis lyrata subsp. lyrata] >gi|297337802|gb|EFH68219.1| hypothetical protein ARALYDRAFT_474808 [Arabidopsis lyrata subsp. lyrata]		8	241	1.07			CL1387.Contig1	comp25256_c0_seq1	-0.0157145	1
	CL4038.Contig1	115 1242 minus strand Isocitrate dehydrogenase [NAD] catalytic subunit 5 [Arabidopsis thaliana] >gi|75249591|sp|Q945K7.1|IDH5_ARATH RecName: Full=Isocitrate dehydrogenase [NAD] catalytic subunit 5, mitochondrial; AltName: Full=IDH-V; AltName: Fu	CL4038.Contig2	7	273	0.743	*	-	CL4038.Contig1	comp35778_c0_seq1	0.314162	0.987975
	Unigene29	2 1699 minus strand hypothetical protein ARALYDRAFT_482209 [Arabidopsis lyrata subsp. lyrata] >gi|297325248|gb|EFH55668.1| hypothetical protein ARALYDRAFT_482209 [Arabidopsis lyrata subsp. lyrata]		3	320	1.911			Unigene29	comp32249_c0_seq5	-31.8343	0.0686039
	Unigene16443	2 334 hypothetical protein ARALYDRAFT_904132 [Arabidopsis lyrata subsp. lyrata] >gi|297326094|gb|EFH56514.1| hypothetical protein ARALYDRAFT_904132 [Arabidopsis lyrata subsp. lyrata]		6	120	0.986			Unigene16443	comp20639_c0_seq1	2.573	0.0167156
	CL13958.Contig1	132 455 minus strand ubiquitin-like protein [Arabidopsis thaliana]	CL13958.Contig2 Unigene17790	2	105	2.214			CL13958.Contig1	comp19219_c0_seq1	-0.793322	1
	CL3151.Contig2	224 1321 minus strand AT5g67360/K8K14_8 [Arabidopsis thaliana] >gi|24111425|gb|AAN46863.1| At5g67360/K8K14_8 [Arabidopsis thaliana]		10	378	0.594	*	-	CL3151.Contig2	comp20746_c0_seq1	-2.37828	0.215042
	CL4540.Contig1	90 1691 minus strand hypothetical protein ARALYDRAFT_472022 [Arabidopsis lyrata subsp. lyrata] >gi|297338824|gb|EFH69241.1| hypothetical protein ARALYDRAFT_472022 [Arabidopsis lyrata subsp. lyrata]	CL4540.Contig2	5	123	1.585	*	+	CL4540.Contig1	comp30659_c0_seq2	-0.860266	0.37252
	CL7675.Contig1	688 1341 minus strand hypothetical protein ARALYDRAFT_900444 [Arabidopsis lyrata subsp. lyrata] >gi|297332142|gb|EFH62561.1| hypothetical protein ARALYDRAFT_900444 [Arabidopsis lyrata subsp. lyrata]	CL7675.Contig3	6	105	1.259	*	+	CL7675.Contig1	comp30666_c3_seq5	-1.4816	0.0939423
	Unigene222	135 1484 minus strand hypothetical protein ARALYDRAFT_479107 [Arabidopsis lyrata subsp. lyrata] >gi|297330981|gb|EFH61400.1| hypothetical protein ARALYDRAFT_479107 [Arabidopsis lyrata subsp. lyrata]		10	440	2.831	*	+	Unigene222	comp27177_c0_seq1	2.49369	0.00316584
	CL5908.Contig1	231 422 40S ribosomal protein S28-2 [Arabidopsis thaliana] >gi|464720|sp|P34789.1|RS282_ARATH RecName: Full=40S ribosomal protein S28-2 >gi|409184|gb|AAA32862.1| ribosomal protein S28 [Arabidopsis thaliana] >gi|10176962|dbj|BAB10282.1| 40S riboso	CL5908.Contig2 CL5908.Contig3 Unigene16089	2	76	0.337			CL5908.Contig1	comp22678_c0_seq3	0.848028	0.473359
	CL9433.Contig1	174 1328 minus strand enoyl-[acyl-carrier protein] reductase [Brassica napus]	CL9433.Contig3	2	313	1.195			CL9433.Contig1	comp28118_c0_seq1	0.773938	0.496755
	CL13584.Contig2	109 1170 minus strand unnamed protein product [Thellungiella halophila]	CL13584.Contig3	5	121	0.578	*	-	CL13584.Contig2	comp30403_c0_seq2	-3.34968	0.000314086	-
	CL9209.Contig1	120 812 minus strand peroxiredoxin-2E [Arabidopsis thaliana] >gi|143360522|sp|Q949U7.2|PRX2E_ARATH RecName: Full=Peroxiredoxin-2E, chloroplastic; AltName: Full=Peroxiredoxin IIE; AltName: Full=Thioredoxin reductase 2E; Flags: Precursor >gi|75297		9	258	1.103			CL9209.Contig1	comp28393_c0_seq6	-1.00035	0.821569
	CL5222.Contig2	70 897 minus strand 5-formyltetrahydrofolate cycloligase [Arabidopsis thaliana] >gi|22087553|gb|AAM90960.1|AF516365_1 5-formyltetrahydrofolate cycloligase [Arabidopsis thaliana] >gi|21536640|gb|AAM60972.1| 5-formyltetrahydrofolate cyclo-ligase-l		2	112	0.977			CL5222.Contig2	comp22639_c0_seq1	-0.119823	0.984206
	CL6237.Contig2	2 592 minus strand putative phosphatase [Arabidopsis thaliana]		3	91	0.869			CL6237.Contig2	comp29017_c0_seq2	-0.618021	0.587173
	CL13925.Contig1	2 2167 4-alpha-glucanotransferase [Arabidopsis thaliana] >gi|75158841|sp|Q8RXD9.1|DPE2_ARATH RecName: Full=4-alpha-glucanotransferase DPE2; AltName: Full=Amylomaltase; AltName: Full=Disproportionating enzyme; Short=D-enzyme; AltName: Full=Protein	CL13925.Contig2	9	182	1.305	*	+	CL13925.Contig1	comp29489_c0_seq1	1.23267	0.267588
	CL7998.Contig2	196 564 RecName: Full=Thioredoxin H-type; Short=Trx-H >gi|3062793|dbj|BAA25681.1| Thioredoxin [Brassica rapa]		15	417	1.975			CL7998.Contig2	comp27690_c0_seq7	31.3912	0.139691
	CL6952.Contig1	70 654 hypothetical protein ARALYDRAFT_496421 [Arabidopsis lyrata subsp. lyrata] >gi|297312326|gb|EFH42750.1| hypothetical protein ARALYDRAFT_496421 [Arabidopsis lyrata subsp. lyrata]		4	105	1.07			CL6952.Contig1	comp20287_c0_seq1	1.39321	0.426712
	CL13025.Contig2	201 494 minus strand small ubiquitin-related modifier 1 [Arabidopsis thaliana] >gi|21542462|sp|P55852.2|SUMO1_ARATH RecName: Full=Small ubiquitin-related modifier 1; Short=AtSUMO1; AltName: Full=Ubiquitin-like protein SMT3 >gi|4455207|emb|CAB365		3	92	1.921			CL13025.Contig2	comp28197_c0_seq1	0.621715	0.79176
	CL1252.Contig1	1831 3258 minus strand RecName: Full=Probable ADP-ribosylation factor GTPase-activating protein AGD5; Short=ARF GAP AGD5; AltName: Full=Protein ARF-GAP DOMAIN 5; Short=AtAGD5; AltName: Full=Protein ZIGA3 >gi|233770206|gb|ACQ91177.1| nevershed [A	CL1252.Contig4 CL1252.Contig5 CL1252.Contig7	8	197	0.673	*	-	CL1252.Contig1	comp31887_c0_seq4	-33.1077	0.00216143
	CL2634.Contig1	57 911 minus strand hypothetical protein ARALYDRAFT_476813 [Arabidopsis lyrata subsp. lyrata] >gi|297334932|gb|EFH65350.1| hypothetical protein ARALYDRAFT_476813 [Arabidopsis lyrata subsp. lyrata]		5	162	1.109			CL2634.Contig1	comp23048_c1_seq1	1.43216	0.263296
	CL4104.Contig1	143 1012 predicted protein [Arabidopsis lyrata subsp. lyrata] >gi|297333630|gb|EFH64048.1| predicted protein [Arabidopsis lyrata subsp. lyrata]		7	192	0.764			CL4104.Contig1	comp16706_c0_seq1	2.32414	0.00922929
	CL4646.Contig1	225 614 minus strand hypothetical protein ARALYDRAFT_487638 [Arabidopsis lyrata subsp. lyrata] >gi|297317142|gb|EFH47564.1| hypothetical protein ARALYDRAFT_487638 [Arabidopsis lyrata subsp. lyrata]	CL4646.Contig2	3	98	1.038			CL4646.Contig1	comp26353_c1_seq1	-1.08283	0.398102
	Unigene13480	52 522 minus strand 2Fe-2S ferredoxin-like protein [Arabidopsis thaliana] >gi|297829298|ref|XP_002882531.1| electron carrier/ iron ion binding protein [Arabidopsis lyrata subsp. lyrata] >gi|297328371|gb|EFH58790.1| electron carrier/ iron ion bin		5	116	1.535	*	+	Unigene13480	comp11854_c0_seq1	-0.0409028	1
	CL287.Contig5	42 1643 minus strand FAD-binding and BBE domain-containing protein [Arabidopsis thaliana] >gi|16323167|gb|AAL15318.1| At1g30760/T5I8_22 [Arabidopsis thaliana] >gi|28416457|gb|AAO42759.1| At1g30760/T5I8_22 [Arabidopsis thaliana] >gi|332193149|gb|		8	219	1.16			CL287.Contig5	comp27600_c0_seq1	0.355541	0.81305
	CL3019.Contig2	133 630 minus strand glycine cleavage system H protein [Arabidopsis thaliana] >gi|12644523|sp|Q9LQL0.1|GCSH2_ARATH RecName: Full=Probable glycine cleavage system H protein 2, mitochondrial; Flags: Precursor >gi|8920623|gb|AAF81345.1|AC007767_25		3	193	0.99			CL3019.Contig2	comp26771_c0_seq9	33.0512	0.00216143
	Unigene24993	158 757 calmodulin-binding protein [Arabidopsis lyrata subsp. lyrata] >gi|297321265|gb|EFH51686.1| calmodulin-binding protein [Arabidopsis lyrata subsp. lyrata]		4	234	0.582	*	-	Unigene24993	comp30681_c2_seq14	0.227472	0.950102
	CL7135.Contig1	2 763 minus strand phosphoglycerate kinase, partial [Arabidopsis thaliana]		3	580	1.226			CL7135.Contig1	comp29403_c0_seq13	0.598118	1
	CL3406.Contig2	87 758 minus strand proteosome subunit [Arabidopsis thaliana]	CL3406.Contig3	2	290	0.719			CL3406.Contig2	comp65562_c0_seq1	1.599	0.461399
	CL14323.Contig1	295 540 minus strand NOI protein [Arabidopsis thaliana] >gi|8843736|dbj|BAA97284.1| NOI protein, nitrate-induced [Arabidopsis thaliana]	CL14323.Contig2	2	125	1.248			CL14323.Contig1	comp30812_c0_seq2	1.91173	0.0233181
	CL12502.Contig2	35 502 minus strand hypothetical protein ARALYDRAFT_475012 [Arabidopsis lyrata subsp. lyrata] >gi|297332243|gb|EFH62661.1| hypothetical protein ARALYDRAFT_475012 [Arabidopsis lyrata subsp. lyrata]		3	178	1.389			CL12502.Contig2	comp21811_c0_seq1	2.25107	0.215042
	CL4264.Contig2	37 792 minus strand Mitochondrial glycoprotein family protein [Arabidopsis thaliana] >gi|30102600|gb|AAP21218.1| At3g55605 [Arabidopsis thaliana] >gi|332645886|gb|AEE79407.1| Mitochondrial glycoprotein family protein [Arabidopsis thaliana]		2	89	1.055			CL4264.Contig2	comp44356_c0_seq1	0.145277	1
	Unigene29834	18 746 hypothetical protein ARALYDRAFT_316436 [Arabidopsis lyrata subsp. lyrata] >gi|297333413|gb|EFH63831.1| hypothetical protein ARALYDRAFT_316436 [Arabidopsis lyrata subsp. lyrata]		23	502	0.782	*	-	Unigene29834	comp25154_c0_seq1	-5.45629	0.0002277	-
	CL1059.Contig4	69 947 minus strand hypothetical protein ARALYDRAFT_893174 [Arabidopsis lyrata subsp. lyrata] >gi|297333826|gb|EFH64244.1| hypothetical protein ARALYDRAFT_893174 [Arabidopsis lyrata subsp. lyrata]		3	108	1.138			CL1059.Contig4	comp23800_c0_seq3	1.56891	0.0998388
	Unigene14035	96 629 minus strand monothiol glutaredoxin-S12 [Arabidopsis thaliana] >gi|119370630|sp|Q8LBS4.2|GRS12_ARATH RecName: Full=Monothiol glutaredoxin-S12, chloroplastic; Short=AtGrxS12; Flags: Precursor >gi|20453151|gb|AAM19817.1| At2g20270/F11A3.18		4	127	1.206			Unigene14035	comp26564_c0_seq3	0.409099	0.866508
	CL2737.Contig1	104 1786 unnamed protein product [Thellungiella halophila]		6	174	1.091			CL2737.Contig1	comp27219_c1_seq1	2.64962	0.0127914
	CL961.Contig1	113 406 minus strand unnamed protein product [Thellungiella halophila]	CL961.Contig2	2	156	0.79			CL961.Contig1	comp23526_c0_seq1	33.6139	0.000314086	+
	CL9605.Contig1	134 1270 mercapto-pyruvate sulfurtransferase 1 [Brassica napus]		8	229	1.084			CL9605.Contig1	comp19532_c0_seq1	-2.14276	0.0866896
	CL12725.Contig2	99 767 minus strand 40S ribosomal protein S8-1 [Arabidopsis thaliana] >gi|75163148|sp|Q93VG5.1|RS81_ARATH RecName: Full=40S ribosomal protein S8-1 >gi|15450474|gb|AAK96530.1| AT5g20290/F5O24_180 [Arabidopsis thaliana] >gi|16974465|gb|AAL31236.1|	CL12725.Contig3	29	925	1.58	*	+	CL12725.Contig2	comp18398_c0_seq1	1.41649	0.122087
	CL13806.Contig1	255 965 minus strand V-type proton ATPase subunit E3 [Arabidopsis thaliana] >gi|229891798|sp|P0CAN7.1|VATE3_ARATH RecName: Full=V-type proton ATPase subunit E3; Short=V-ATPase subunit E3; AltName: Full=Vacuolar H(+)-ATPase subunit E isoform 3; A	CL13806.Contig2 CL13806.Contig3	2	133	0.651			CL13806.Contig1	comp23500_c0_seq1	1.0912	0.279222
	CL5250.Contig2	86 1219 hypothetical protein ARALYDRAFT_488325 [Arabidopsis lyrata subsp. lyrata] >gi|297317468|gb|EFH47890.1| hypothetical protein ARALYDRAFT_488325 [Arabidopsis lyrata subsp. lyrata]	CL5250.Contig3	21	395	1.808			CL5250.Contig2	comp30297_c0_seq1	-0.464615	0.814958
	CL11260.Contig1	2 829 hypothetical protein ARALYDRAFT_903473 [Arabidopsis lyrata subsp. lyrata] >gi|297327620|gb|EFH58040.1| hypothetical protein ARALYDRAFT_903473 [Arabidopsis lyrata subsp. lyrata]		3	80	0.762			CL11260.Contig1	comp28608_c1_seq3	-1.00336	0.364857
	Unigene29749	181 1722 minus strand RecName: Full=3-phosphoshikimate 1-carboxyvinyltransferase, chloroplastic; AltName: Full=5-enolpyruvylshikimate-3-phosphate synthase; Short=EPSP synthase; Flags: Precursor >gi|17815|emb|CAA35839.1| 5-enolpyruvylshikimate-3-		7	165	1.623			Unigene29749	comp24999_c0_seq1	0.536474	0.637434
	CL8969.Contig1	37 1569 serine hydroxymethyltransferase 2 [Arabidopsis thaliana] >gi|227202628|dbj|BAH56787.1| AT5G26780 [Arabidopsis thaliana] >gi|332006219|gb|AED93602.1| serine hydroxymethyltransferase 2 [Arabidopsis thaliana]		12	250	0.635	*	-	CL8969.Contig1	comp31475_c0_seq11	-0.264747	0.916934
	CL3621.Contig1	51 311 minus strand hypothetical protein ARALYDRAFT_492602 [Arabidopsis lyrata subsp. lyrata] >gi|297315649|gb|EFH46072.1| hypothetical protein ARALYDRAFT_492602 [Arabidopsis lyrata subsp. lyrata]		7	180	1.297			CL3621.Contig1	comp18808_c0_seq2	-1.4117	0.50691
	CL14184.Contig1	83 1669 RecName: Full=Probable nucleolar protein 5-1; AltName: Full=MAR-binding NOP56/58 homolog 1; AltName: Full=NOP58-like protein F108; AltName: Full=Nucleolar protein 58-1 >gi|11878185|gb|AAG40836.1|AF302490_1 NOP58-like protein F108 [Arabido		7	313	3.115	*	+	CL14184.Contig1	comp21679_c0_seq1	-1.17939	0.315643
	Unigene26821	103 1374 minus strand hypothetical protein ARALYDRAFT_495659 [Arabidopsis lyrata subsp. lyrata] >gi|297311945|gb|EFH42369.1| hypothetical protein ARALYDRAFT_495659 [Arabidopsis lyrata subsp. lyrata]		11	388	0.897	*		Unigene26821	comp30632_c2_seq1	3.76706	1.46e-05	+
	CL180.Contig1	3 3536 hypothetical protein 26.t00005 [Brassica oleracea]		2	80	1.139			CL180.Contig1	comp32128_c0_seq14	34.7718	2.04e-06	+
	CL2532.Contig1	209 691 AT5G10020-like protein [Arabidopsis arenosa]		3	110	0.623			CL2532.Contig1	comp31681_c0_seq2	33.6473	0.000260482	+
	CL11679.Contig1	128 505 minus strand expressed protein [Aureococcus anophagefferens]	CL11679.Contig2	2	63	0.681			CL11679.Contig1	comp32090_c0_seq3	0.0416187	1
	CL4007.Contig4	139 1221 minus strand unnamed protein product [Thellungiella halophila]		3	73	1.091			CL4007.Contig4	comp27851_c0_seq2	3.57195	0.00781322
	CL13868.Contig1	2 1450 minus strand alpha-1,4-galacturonosyltransferase [Arabidopsis thaliana] >gi|75163841|sp|Q93ZX7.1|GAUT4_ARATH RecName: Full=Probable galacturonosyltransferase 4; AltName: Full=Like glycosyl transferase 3 >gi|332008188|gb|AED95571.1| alpha-		3	74	0.629			CL13868.Contig1	comp31344_c0_seq1	-0.125322	0.98323
	CL9948.Contig1	89 946 minus strand cold shock domain protein 3 [Eutrema salsugineum]	CL9948.Contig2	3	69	1.119			CL9948.Contig1	comp29170_c0_seq21	3.23188	0.000537953	+
	CL13927.Contig1	128 952 predicted protein [Arabidopsis lyrata subsp. lyrata] >gi|297327175|gb|EFH57595.1| predicted protein [Arabidopsis lyrata subsp. lyrata]	CL13927.Contig2	11	338	1.207	*	+	CL13927.Contig1	comp34333_c0_seq1	2.38904	0.00466485
	CL9031.Contig1	126 626 minus strand hypothetical protein ARALYDRAFT_312752 [Arabidopsis lyrata subsp. lyrata] >gi|297338814|gb|EFH69231.1| hypothetical protein ARALYDRAFT_312752 [Arabidopsis lyrata subsp. lyrata]		4	356	1.102			CL9031.Contig1	comp70455_c0_seq1	-0.793322	0.643979
	CL14356.Contig1	1 2268 serine/threonine-protein phosphatase BSL1 [Arabidopsis thaliana] >gi|332278164|sp|Q8L7U5.2|BSL1_ARATH RecName: Full=Serine/threonine-protein phosphatase BSL1; AltName: Full=BSU1-like protein 1 >gi|332656868|gb|AEE82268.1| serine/threonine-		5	257	0.972			CL14356.Contig1	comp30467_c0_seq15	0.655757	0.916934
	CL11028.Contig4	36 290 minus strand serine carboxypeptidase-like 35 [Arabidopsis thaliana] >gi|75334909|sp|Q9LEY1.1|SCP35_ARATH RecName: Full=Serine carboxypeptidase-like 35; Flags: Precursor >gi|8346563|emb|CAB93727.1| serine-type carboxypeptidase II-like prot		3	68	0.963			CL11028.Contig4	comp9453_c0_seq1	31.2363	0.139691
	CL603.Contig2	206 1567 minus strand TPX2 (targeting protein for Xklp2)-like protein [Arabidopsis thaliana] >gi|16209720|gb|AAL14415.1| At2g35880/F11F19.21 [Arabidopsis thaliana] >gi|20197995|gb|AAD21469.2| expressed protein [Arabidopsis thaliana] >gi|33025407	Unigene28793	6	167	1.589	*	+	CL603.Contig2	comp29116_c0_seq2	-33.8534	0.000128561	-
	Unigene388	2 697 minus strand delta 1-pyrroline-5-carboxylate synthetase B [Brassica napus]		7	184	1.043			Unigene388	comp31292_c0_seq1	-0.831779	0.406135
	Unigene14332	103 1545 minus strand hypothetical protein ARALYDRAFT_481718 [Arabidopsis lyrata subsp. lyrata] >gi|297326801|gb|EFH57221.1| hypothetical protein ARALYDRAFT_481718 [Arabidopsis lyrata subsp. lyrata]		9	268	1.512	*	+	Unigene14332	comp33233_c0_seq1	-3.03064	0.00024537	-
	CL3808.Contig2	79 492 minus strand hypothetical protein ARALYDRAFT_911322 [Arabidopsis lyrata subsp. lyrata] >gi|297320454|gb|EFH50876.1| hypothetical protein ARALYDRAFT_911322 [Arabidopsis lyrata subsp. lyrata]		2	53	1.884			CL3808.Contig2	comp22246_c0_seq2	-0.856488	0.852408
	CL6572.Contig2	245 1288 RecName: Full=Probable lactoylglutathione lyase, chloroplast; AltName: Full=Glyoxalase I; Flags: Precursor >gi|16930396|gb|AAL31884.1|AF419551_1 At1g67280/F1N21_10 [Arabidopsis thaliana] >gi|19310505|gb|AAL84986.1| At1g67280/F1N21_10 [Ar		7	103	0.821			CL6572.Contig2	comp29200_c0_seq1	-0.286834	0.861141
	CL8685.Contig1	87 1457 minus strand early-responsive to dehydration 7 [Arabidopsis lyrata subsp. lyrata] >gi|297331970|gb|EFH62389.1| early-responsive to dehydration 7 [Arabidopsis lyrata subsp. lyrata]		2	331	1.059			CL8685.Contig1	comp24481_c0_seq1	3.25107	0.0200085
	CL9005.Contig1	98 523 minus strand expressed protein [Arabidopsis lyrata subsp. lyrata] >gi|297335756|gb|EFH66173.1| expressed protein [Arabidopsis lyrata subsp. lyrata]		30	1835	1.07			CL9005.Contig1	comp28625_c0_seq1	-1.00569	0.708699
	Unigene25120	130 1521 thiohydroximate S-glucosyltransferase [Brassica napus]		4	134	1.387			Unigene25120	comp26120_c0_seq2	1.02799	0.708699
	CL3768.Contig1	1 2664 minus strand GYF domain-containing protein [Arabidopsis lyrata subsp. lyrata] >gi|297339308|gb|EFH69725.1| GYF domain-containing protein [Arabidopsis lyrata subsp. lyrata]		7	345	1.373			CL3768.Contig1	comp29623_c0_seq11	3.02891	0.0570073
	Unigene1876	2 994 carboxypeptidase [Arabidopsis thaliana] >gi|20455475|sp|P32826.2|SCP49_ARATH RecName: Full=Serine carboxypeptidase-like 49; Flags: Precursor >gi|20147199|gb|AAM10315.1| AT3g10410/F13M14_32 [Arabidopsis thaliana] >gi|23506193|gb|AAN31108.1|		2	32	1.083			Unigene1876	comp30949_c0_seq11	32.3585	0.0184434
	CL4090.Contig3	97 1353 minus strand 26S proteasome regulatory subunit N6 [Arabidopsis thaliana] >gi|9502423|gb|AAF88122.1|AC021043_15 Similar to 26S proteasome subunits [Arabidopsis thaliana] >gi|32700024|gb|AAP86662.1| 26S proteasome subunit RPN6a [Arabidopsi		9	197	1.514	*	+	CL4090.Contig3	comp30797_c0_seq10	-0.772511	0.453423
	Unigene6141	149 2044 hypothetical protein ARALYDRAFT_484140 [Arabidopsis lyrata subsp. lyrata] >gi|297322639|gb|EFH53060.1| hypothetical protein ARALYDRAFT_484140 [Arabidopsis lyrata subsp. lyrata]		5	118	1.428	*	+	Unigene6141	comp36239_c0_seq1	-0.811024	0.426712
	Unigene405	3 1451 minus strand trehalose-6-phosphate synthase, putative [Brassica oleracea]		5	88	1.013			Unigene405	comp31095_c0_seq1	0.0904911	1
	CL7887.Contig1	89 508 minus strand putative RNase H [Arabidopsis thaliana]		2	39	0.434			CL7887.Contig1	comp22657_c0_seq1	0.201836	0.935805
	CL319.Contig1	5 805 minus strand uncharacterized protein [Arabidopsis thaliana] >gi|332660573|gb|AEE85973.1| uncharacterized protein [Arabidopsis thaliana]	CL319.Contig4 CL319.Contig5	4	142	1.582	*	+	CL319.Contig1	comp29747_c0_seq1	0.170235	0.998461
	CL14052.Contig1	103 2055 minus strand hypothetical protein ARALYDRAFT_888760 [Arabidopsis lyrata subsp. lyrata] >gi|297338621|gb|EFH69038.1| hypothetical protein ARALYDRAFT_888760 [Arabidopsis lyrata subsp. lyrata]		3	93	1.17			CL14052.Contig1	comp27354_c1_seq1	33.7757	0.000152415	+
	CL5258.Contig2	193 1266 minus strand hypothetical protein [Arabidopsis thaliana]		4	125	0.786			CL5258.Contig2	comp28321_c0_seq1	-0.467978	0.69611
	CL1804.Contig4	93 1868 minus strand pectinesterase 3 [Arabidopsis thaliana] >gi|229891485|sp|O49006.2|PME3_ARATH RecName: Full=Pectinesterase/pectinesterase inhibitor 3; Includes: RecName: Full=Pectinesterase inhibitor 3; AltName: Full=Pectin methylesterase in		3	195	1.08			CL1804.Contig4	comp29508_c0_seq1	5.08841	6.21e-08	+
	Unigene7917	4 1047 hypothetical protein ARALYDRAFT_490751 [Arabidopsis lyrata subsp. lyrata] >gi|297312714|gb|EFH43137.1| hypothetical protein ARALYDRAFT_490751 [Arabidopsis lyrata subsp. lyrata]		8	297	0.778			Unigene7917	comp39557_c0_seq1	-0.0468961	1
	CL11541.Contig3	2 469 hypothetical protein ARALYDRAFT_908346 [Arabidopsis lyrata subsp. lyrata] >gi|297316940|gb|EFH47362.1| hypothetical protein ARALYDRAFT_908346 [Arabidopsis lyrata subsp. lyrata]		3	68	0.862			CL11541.Contig3	comp26447_c0_seq1	-2.20279	0.00743146
	CL6292.Contig1	3 2441 ATP-dependent helicase BRM [Arabidopsis thaliana] >gi|75122353|sp|Q6EVK6.1|BRM_ARATH RecName: Full=ATP-dependent helicase BRM; Short=AtBRM; AltName: Full=Protein BRAHMA >gi|330255538|gb|AEC10632.1| ATP-dependent helicase BRM [Arabidopsis t		2	77	0.75			CL6292.Contig1	comp32259_c0_seq1	-0.241823	0.889088
	CL5004.Contig1	76 2031 dentin sialophosphoprotein-related protein [Arabidopsis thaliana] >gi|332645759|gb|AEE79280.1| dentin sialophosphoprotein-related protein [Arabidopsis thaliana]	CL5004.Contig2 Unigene22893	6	90	0.76			CL5004.Contig1	comp28788_c0_seq1	1.12138	0.467027
	CL3909.Contig1	79 1803 minus strand EMB2755 [Arabidopsis lyrata subsp. lyrata] >gi|297310309|gb|EFH40733.1| EMB2755 [Arabidopsis lyrata subsp. lyrata]		7	185	1.253			CL3909.Contig1	comp53422_c0_seq1	0.317709	0.880893
	Unigene2388	1 1131 minus strand hypothetical protein ARALYDRAFT_492801 [Arabidopsis lyrata subsp. lyrata] >gi|297313709|gb|EFH44132.1| hypothetical protein ARALYDRAFT_492801 [Arabidopsis lyrata subsp. lyrata]		2	108	1.217			Unigene2388	comp31581_c0_seq1	-0.471885	0.696065
	Unigene7614	65 544 hypothetical protein ARALYDRAFT_486945 [Arabidopsis lyrata subsp. lyrata] >gi|297316768|gb|EFH47190.1| hypothetical protein ARALYDRAFT_486945 [Arabidopsis lyrata subsp. lyrata]		2	197	1.492			Unigene7614	comp9607_c0_seq1	-0.615129	0.585601
	CL3039.Contig1	1 2127 minus strand hypothetical protein ARALYDRAFT_489250 [Arabidopsis lyrata subsp. lyrata] >gi|297317918|gb|EFH48340.1| hypothetical protein ARALYDRAFT_489250 [Arabidopsis lyrata subsp. lyrata]		10	363	1.07			CL3039.Contig1	comp30419_c0_seq2	34.2047	2.66e-05	+
	Unigene28604	178 2082 minus strand AP2-associated kinase [Arabidopsis thaliana] >gi|330253658|gb|AEC08752.1| AP2-associated kinase [Arabidopsis thaliana]		2	106	0.895			Unigene28604	comp26930_c0_seq4	-0.488081	0.82492
	Unigene1217	2 523 minus strand AT4G20890 [Arabidopsis thaliana]		4	528	1.282			Unigene1217	comp29840_c1_seq1	34.4587	9.17e-06	+
	Unigene13074	28 522 minus strand hypothetical protein ARALYDRAFT_492307 [Arabidopsis lyrata subsp. lyrata] >gi|297315518|gb|EFH45941.1| hypothetical protein ARALYDRAFT_492307 [Arabidopsis lyrata subsp. lyrata]		2	123	0.833			Unigene13074	comp99325_c0_seq1	-3.20836	0.194336
	CL1180.Contig20	99 1943 minus strand NADP-malic enzyme 2 [Arabidopsis lyrata subsp. lyrata] >gi|297317323|gb|EFH47745.1| NADP-malic enzyme 2 [Arabidopsis lyrata subsp. lyrata]		5	1151	1.439			CL1180.Contig20	comp29611_c0_seq1	-2.79551	0.00190657
	CL3501.Contig1	84 1838 minus strand RecName: Full=RuBisCO large subunit-binding protein subunit alpha, chloroplastic; AltName: Full=60 kDa chaperonin subunit alpha; AltName: Full=CPN-60 alpha; Flags: Precursor >gi|415925|emb|CAA81736.1| chaperonin-60 alpha sub		15	410	1.076			CL3501.Contig1	comp16090_c0_seq1	1.20668	0.650873
	CL13876.Contig1	118 384 minus strand ubiquitin-fold modifier 1 [Arabidopsis thaliana] >gi|20140765|sp|Q9CA23.1|UFM1_ARATH RecName: Full=Ubiquitin-fold modifier 1; Flags: Precursor >gi|332197891|gb|AEE36012.1| ubiquitin-fold modifier 1 [Arabidopsis thaliana]		15	413	0.928			CL13876.Contig1	comp20577_c0_seq1	0.533037	0.666536
	CL8071.Contig1	198 2234 minus strand oligopeptidase A [Arabidopsis thaliana] >gi|332004178|gb|AED91561.1| oligopeptidase A [Arabidopsis thaliana]		4	98	1.234			CL8071.Contig1	comp14172_c0_seq1	32.1394	0.0251893
	CL3596.Contig2	46 1260 minus strand hypothetical protein ARALYDRAFT_496591 [Arabidopsis lyrata subsp. lyrata] >gi|297310715|gb|EFH41139.1| hypothetical protein ARALYDRAFT_496591 [Arabidopsis lyrata subsp. lyrata]		24	857	0.762	*	-	CL3596.Contig2	comp30853_c0_seq6	-1.58008	0.071363
	CL405.Contig1	22 612 unknown [Arabidopsis thaliana]		3	48	0.953			CL405.Contig1	comp35201_c0_seq1	0.230925	0.916934
	Unigene1882	2 1207 minus strand hypothetical protein ARALYDRAFT_919664 [Arabidopsis lyrata subsp. lyrata] >gi|297310697|gb|EFH41121.1| hypothetical protein ARALYDRAFT_919664 [Arabidopsis lyrata subsp. lyrata]		2	266	1.276			Unigene1882	comp28500_c0_seq1	-0.540203	0.681821
	CL2196.Contig2	294 1820 unnamed protein product [Thellungiella halophila]	CL2196.Contig1	10	268	1.563	*	+	CL2196.Contig2	comp21347_c0_seq1	-0.793322	0.526679
	CL6390.Contig1	527 1891 chloroplast elongation factor tub [Arabidopsis lyrata subsp. lyrata] >gi|297315771|gb|EFH46194.1| chloroplast elongation factor tub [Arabidopsis lyrata subsp. lyrata]	CL6390.Contig2 CL6390.Contig3	7	184	1.72	*	+	CL6390.Contig1	comp32033_c0_seq4	0.477684	0.837231
	CL2397.Contig1	95 1312 60S ribosomal protein L4-1 [Arabidopsis thaliana] >gi|17369604|sp|Q9SF40.1|RL4A_ARATH RecName: Full=60S ribosomal protein L4-1; Short=L1 >gi|15982715|gb|AAL09727.1| AT3g09630/F11F8_22 [Arabidopsis thaliana] >gi|30725664|gb|AAP37854.1| At3		13	626	1.708	*	+	CL2397.Contig1	comp31482_c0_seq5	-37.5241	1.17e-12	-
[truncated: 128 more rows]
