# Supplementary material for: Functional and Integrative Analysis of the Proteomic Profile of Radish Root under Pb Exposure
Source: Front Plant Sci. 2016 Dec 15;7:1871. doi: 10.3389/fpls.2016.01871 (PMC5156831; doi:10.3389/fpls.2016.01871)
Supplement: Table S5 — The correlated DAPS and DEGs involved in Pb stress response of radish. [file Table5.xlsx]

## Sheet: pb-1000-VS-CK_all_results_expre
Table S5 The correlated DAPS and DEGs involved in Pb stress response of radish
DEPs_DEGs(57)
Same trends(25)
Protein ID	Description	Sameset	Pep_num	Score	Quantition(CK_all_results/pb-1000)	Sig	diff_Protein	GeneID&ProteinID	GeneID	log2(CK_all_results/pb-1000)	Fdr	diff_gene
Unigene23950	1 1032 GHMP kinase family protein [Arabidopsis lyrata subsp. lyrata] >gi|297336798|gb|EFH67215.1| GHMP kinase family protein [Arabidopsis lyrata subsp. lyrata]		3	98	0.809	*	-	Unigene23950	comp30037_c0_seq2	-34.8498	1.52e-06	-
Unigene27310	130 327 minus strand peroxidase [Brassica napus]		4	53	0.377	*	-	Unigene27310	comp29794_c3_seq1	-6.20832	1.97e-11	-
CL4308.Contig1	1 1956 cobalamin-independent methionine synthase [Arabidopsis lyrata subsp. lyrata] >gi|297317624|gb|EFH48046.1| cobalamin-independent methionine synthase [Arabidopsis lyrata subsp. lyrata]		49	2279	1.758	*	+	CL4308.Contig1	comp12095_c0_seq1	3.43824	6.17e-05	+
Unigene28391	112 969 minus strand unnamed protein product [Thellungiella halophila]		3	97	2.188	*	+	Unigene28391	comp23089_c1_seq1	33.6958	0.000216757	+
Unigene30073	3 641 trypsin inhibitor propeptide [Brassica oleracea]		3	89	3.711	*	+	Unigene30073	comp34646_c0_seq1	7.20103	2.16e-08	+
Unigene20076	63 542 jasmonate inducible protein [Brassica napus]		10	199	3.641	*	+	Unigene20076	comp25731_c0_seq2	4.19081	1.16e-05	+
CL4329.Contig1	56 1864 minus strand hypothetical protein ARALYDRAFT_486945 [Arabidopsis lyrata subsp. lyrata] >gi|297316768|gb|EFH47190.1| hypothetical protein ARALYDRAFT_486945 [Arabidopsis lyrata subsp. lyrata]		10	496	1.543	*	+	CL4329.Contig1	comp31990_c1_seq1	4.18967	7.42e-06	+
CL14494.Contig1	51 878 minus strand legume lectin family protein [Arabidopsis lyrata subsp. lyrata] >gi|297330987|gb|EFH61406.1| legume lectin family protein [Arabidopsis lyrata subsp. lyrata]		30	1016	0.73	*	-	CL14494.Contig1	comp25360_c0_seq1	-6.66252	1.92e-12	-
CL8236.Contig1	76 1413 minus strand hypothetical protein ARALYDRAFT_485477 [Arabidopsis lyrata subsp. lyrata] >gi|297321914|gb|EFH52335.1| hypothetical protein ARALYDRAFT_485477 [Arabidopsis lyrata subsp. lyrata]		2	63	1.696	*	+	CL8236.Contig1	comp24481_c1_seq1	5.3766	0.000131038	+
CL452.Contig4	3 200 minus strand beta-xylosidase 4 [Arabidopsis lyrata subsp. lyrata] >gi|297312458|gb|EFH42882.1| beta-xylosidase 4 [Arabidopsis lyrata subsp. lyrata]		3	129	0.451	*	-	CL452.Contig4	comp30454_c0_seq1	-33.9816	7.8e-05	-
CL9911.Contig3	1 600 hypothetical protein ARALYDRAFT_895079 [Arabidopsis lyrata subsp. lyrata] >gi|297333267|gb|EFH63685.1| hypothetical protein ARALYDRAFT_895079 [Arabidopsis lyrata subsp. lyrata]		7	177	5.521	*	+	CL9911.Contig3	comp37862_c0_seq1	34.4843	8.07e-06	+
CL8195.Contig1	21 1163 minus strand predicted protein [Arabidopsis lyrata subsp. lyrata] >gi|297339268|gb|EFH69685.1| predicted protein [Arabidopsis lyrata subsp. lyrata]		13	309	4.243	*	+	CL8195.Contig1	comp29971_c0_seq4	36.922	2.92e-11	+
CL3856.Contig2	126 1463 minus strand senescence-associated cysteine protease [Brassica oleracea]		15	573	0.784	*	-	CL3856.Contig2	comp26987_c0_seq6	-2.89286	0.000705527	-
Unigene8449	144 383 uncharacterized protein [Arabidopsis thaliana] >gi|34365641|gb|AAQ65132.1| At3g48180 [Arabidopsis thaliana] >gi|332644856|gb|AEE78377.1| uncharacterized protein [Arabidopsis thaliana]		3	51	0.584	*	-	Unigene8449	comp14339_c0_seq1	-5.71086	4.95e-07	-
Unigene29031	2 262 minus strand pfkB-type carbohydrate kinase family protein [Arabidopsis lyrata subsp. lyrata] >gi|297327011|gb|EFH57431.1| pfkB-type carbohydrate kinase family protein [Arabidopsis lyrata subsp. lyrata]		6	237	1.644	*	+	Unigene29031	comp27434_c0_seq2	3.27252	0.000264905	+
CL1605.Contig2	65 559 minus strand hypothetical protein ARALYDRAFT_491553 [Arabidopsis lyrata subsp. lyrata] >gi|297315146|gb|EFH45569.1| hypothetical protein ARALYDRAFT_491553 [Arabidopsis lyrata subsp. lyrata]		6	143	1.456	*	+	CL1605.Contig2	comp24022_c0_seq1	5.66201	1.34e-06	+
CL4057.Contig1	150 1055 hypothetical protein ARALYDRAFT_916328 [Arabidopsis lyrata subsp. lyrata] >gi|297316600|gb|EFH47023.1| hypothetical protein ARALYDRAFT_916328 [Arabidopsis lyrata subsp. lyrata]		12	340	1.536	*	+	CL4057.Contig1	comp29991_c0_seq4	33.9966	6.67e-05	+
CL13610.Contig1	34 438 minus strand unnamed protein product [Thellungiella halophila]		14	505	0.83	*	-	CL13610.Contig1	comp14047_c0_seq1	-3.93372	3.37e-06	-
CL1519.Contig4	15 824 RecName: Full=Basic endochitinase CHB4; Flags: Precursor >gi|17799|emb|CAA43708.1| chitinase [Brassica napus] >gi|218436742|dbj|BAH03380.1| chitinase [Brassica rapa subsp. chinensis] >gi|244539521|dbj|BAH82668.1| class IV chitinase [Brassi		3	167	0.73	*	-	CL1519.Contig4	comp42207_c0_seq1	-5.25275	0.000570552	-
CL1217.Contig1	89 865 minus strand Clathrin light chain protein [Arabidopsis thaliana] >gi|75096962|sp|O04209.1|CLC2_ARATH RecName: Full=Clathrin light chain 2 >gi|2088662|gb|AAB95291.1| expressed protein [Arabidopsis thaliana] >gi|330254676|gb|AEC09770.1| Cla		18	438	1.231	*	+	CL1217.Contig1	comp27558_c0_seq2	36.0186	3.96e-09	+
CL4672.Contig3	50 1543 minus strand beta-amylase [Raphanus sativus]		43	1474	1.322	*	+	CL4672.Contig3	comp33288_c0_seq1	36.0177	3.96e-09	+
CL13584.Contig2	109 1170 minus strand unnamed protein product [Thellungiella halophila]	CL13584.Contig3	5	121	0.578	*	-	CL13584.Contig2	comp30403_c0_seq2	-3.34968	0.000314086	-
Unigene29834	18 746 hypothetical protein ARALYDRAFT_316436 [Arabidopsis lyrata subsp. lyrata] >gi|297333413|gb|EFH63831.1| hypothetical protein ARALYDRAFT_316436 [Arabidopsis lyrata subsp. lyrata]		23	502	0.782	*	-	Unigene29834	comp25154_c0_seq1	-5.45629	0.0002277	-
CL330.Contig1	173 1240 minus strand hypothetical protein ARALYDRAFT_470808 [Arabidopsis lyrata subsp. lyrata] >gi|297338260|gb|EFH68677.1| hypothetical protein ARALYDRAFT_470808 [Arabidopsis lyrata subsp. lyrata]		15	494	0.522	*	-	CL330.Contig1	comp28544_c0_seq1	-3.49142	8.64e-05	-
CL13610.Contig2	85 816 minus strand osmotin-like protein OSM34 [Arabidopsis thaliana] >gi|21542444|sp|P50700.2|OSL3_ARATH RecName: Full=Osmotin-like protein OSM34; Flags: Precursor >gi|4539456|emb|CAB39936.1| osmotin precursor [Arabidopsis thaliana] >gi|7267865		3	169	0.678	*	-	CL13610.Contig2	comp32278_c0_seq1	-6.53791	2.96e-12	-
Opposite (32)
Protein ID	Description	Sameset	Pep_num	Score	Quantition(CK_all_results/pb-1000)	Sig	diff_Protein	GeneID&ProteinID	GeneID	log2(CK_all_results/pb-1000)	Fdr	diff_gene
CL2847.Contig1	92 919 minus strand gamma carbonic anhydrase 2 [Arabidopsis thaliana] >gi|75169075|sp|Q9C6B3.1|GCA2_ARATH RecName: Full=Gamma carbonic anhydrase 2, mitochondrial; Short=AtCA2; Short=GAMMA CA2; AltName: Full=Transcription factor APFI; Flags: Prec		5	248	0.562	*	-	CL2847.Contig1	comp28371_c0_seq2	34.339	1.55e-05	+
CL2995.Contig1	154 1611 selenium-binding protein, partial [Eutrema halophilum]		42	1293	0.661	*	-	CL2995.Contig1	comp21854_c0_seq1	35.4327	8.21e-08	+
CL5587.Contig1	120 344 catalase 3 [Raphanus sativus]	CL5587.Contig2	3	136	2.993	*	+	CL5587.Contig1	comp30938_c0_seq1	-3.05283	0.000209872	-
CL9278.Contig1	104 829 minus strand pathogenesis-related group 5 protein [Brassica rapa]	CL9278.Contig2	3	79	0.397	*	-	CL9278.Contig1	comp50648_c0_seq1	33.8993	9.18e-05	+
CL8455.Contig2	53 772 hypothetical protein ARALYDRAFT_494579 [Arabidopsis lyrata subsp. lyrata] >gi|297311218|gb|EFH41642.1| hypothetical protein ARALYDRAFT_494579 [Arabidopsis lyrata subsp. lyrata]		43	1420	0.827	*	-	CL8455.Contig2	comp20664_c0_seq1	6.76892	4.36e-09	+
CL861.Contig1	185 1147 chitinase [Brassica rapa]	CL861.Contig2	3	192	0.513	*	-	CL861.Contig1	comp29963_c0_seq2	3.38899	4.77e-05	+
CL7174.Contig1	107 1099 minus strand peroxidase 49 [Arabidopsis thaliana] >gi|26397550|sp|O23237.2|PER49_ARATH RecName: Full=Peroxidase 49; Short=Atperox P49; AltName: Full=ATP31; Flags: Precursor >gi|17530562|gb|AAL40848.1|AF452384_1 class III peroxidase ATP3		14	698	0.438	*	-	CL7174.Contig1	comp24301_c0_seq2	3.54473	0.000964887	+
Unigene6675	43 2331 hypothetical protein ARALYDRAFT_491159 [Arabidopsis lyrata subsp. lyrata] >gi|297312934|gb|EFH43357.1| hypothetical protein ARALYDRAFT_491159 [Arabidopsis lyrata subsp. lyrata]		25	656	0.445	*	-	Unigene6675	comp13526_c0_seq1	2.8606	0.000573633	+
Unigene8058	62 1219 minus strand epithiospecifier modifier [Brassica rapa subsp. pekinensis] >gi|226444219|gb|ACO57706.1| epithiospecifier modifier [Brassica rapa subsp. pekinensis]		91	3249	0.731	*	-	Unigene8058	comp12442_c0_seq1	3.90764	3.12e-06	+
CL2345.Contig1	197 607 minus strand Chain A, Solution Structure Of Pin1at From Arabidopsis Thaliana		5	70	0.783	*	-	CL2345.Contig1	comp23635_c0_seq2	35.3349	1.35e-07	+
CL14649.Contig1	292 729 ribosomal large subunit structural protein [Brassica juncea]		8	195	2.402	*	+	CL14649.Contig1	comp42619_c0_seq1	-33.4447	0.000570552	-
CL452.Contig1	96 2435 minus strand alpha-L-arabinofuranosidase [Raphanus sativus]		9	138	0.526	*	-	CL452.Contig1	comp30454_c0_seq5	3.52567	4.07e-05	+
CL14734.Contig1	228 860 minus strand hypothetical protein ARALYDRAFT_494299 [Arabidopsis lyrata subsp. lyrata] >gi|297309225|gb|EFH39649.1| hypothetical protein ARALYDRAFT_494299 [Arabidopsis lyrata subsp. lyrata]		6	74	0.646	*	-	CL14734.Contig1	comp23510_c0_seq2	3.14747	0.000646799	+
CL1707.Contig2	563 877 minus strand hypothetical protein ARALYDRAFT_470488 [Arabidopsis lyrata subsp. lyrata] >gi|297338098|gb|EFH68515.1| hypothetical protein ARALYDRAFT_470488 [Arabidopsis lyrata subsp. lyrata]	CL1707.Contig3	3	58	1.304	*	+	CL1707.Contig2	comp25356_c0_seq5	-3.33629	0.000126674	-
CL14500.Contig1	117 1109 minus strand peroxidase [Eutrema halophilum]		10	301	0.763	*	-	CL14500.Contig1	comp32272_c0_seq1	5.94131	5.99e-11	+
CL731.Contig3	64 1524 minus strand aspartyl protease family protein [Arabidopsis lyrata subsp. lyrata] >gi|297335107|gb|EFH65525.1| aspartyl protease family protein [Arabidopsis lyrata subsp. lyrata]		10	379	0.494	*	-	CL731.Contig3	comp23329_c0_seq1	2.99842	0.000487028	+
CL10866.Contig2	48 932 minus strand hypothetical protein ARALYDRAFT_473038 [Arabidopsis lyrata subsp. lyrata] >gi|297339360|gb|EFH69777.1| hypothetical protein ARALYDRAFT_473038 [Arabidopsis lyrata subsp. lyrata]		10	258	0.597	*	-	CL10866.Contig2	comp25471_c0_seq4	2.92554	0.000464717	+
CL752.Contig1	49 462 Lamin-like protein OS=Arabidopsis thaliana GN=At5g15350 PE=1 SV=1		14	250	0.446	*	-	CL752.Contig1	comp29984_c0_seq1	3.36801	0.000144752	+
Unigene2474	205 2514 minus strand hypothetical protein ARALYDRAFT_478841 [Arabidopsis lyrata subsp. lyrata] >gi|297330865|gb|EFH61284.1| hypothetical protein ARALYDRAFT_478841 [Arabidopsis lyrata subsp. lyrata]		8	127	0.673	*	-	Unigene2474	comp31078_c0_seq2	2.78176	0.000872686	+
Unigene1489	150 395 minus strand predicted protein [Populus trichocarpa] >gi|222849414|gb|EEE86961.1| predicted protein [Populus trichocarpa]	CL4535.Contig3 CL4535.Contig4 Unigene23348 Unigene23349 Unigene28003 Unigene28004 Unigene28005 Unigene28006	5	103	1.214	*	+	Unigene1489	comp28595_c0_seq8	-33.977	7.8e-05	-
CL14142.Contig1	2 1603 hypothetical protein ARALYDRAFT_480836 [Arabidopsis lyrata subsp. lyrata] >gi|297332091|gb|EFH62510.1| hypothetical protein ARALYDRAFT_480836 [Arabidopsis lyrata subsp. lyrata]		10	554	1.489	*	+	CL14142.Contig1	comp27783_c0_seq1	-34.3273	1.78e-05	-
CL859.Contig3	175 1494 minus strand transaldolase [Arabidopsis thaliana] >gi|7543909|emb|CAB87149.1| transaldolase-like protein [Arabidopsis thaliana] >gi|21592744|gb|AAM64693.1| transaldolase-like protein [Arabidopsis thaliana] >gi|332004509|gb|AED91892.1| t		21	544	1.288	*	+	CL859.Contig3	comp28181_c0_seq2	-3.42472	9.18e-05	-
CL14346.Contig1	132 1397 phospholipase C [Arabidopsis lyrata subsp. lyrata] >gi|297312551|gb|EFH42975.1| phospholipase C [Arabidopsis lyrata subsp. lyrata]	CL14346.Contig2	6	192	0.736	*	-	CL14346.Contig1	comp30578_c0_seq2	33.6139	0.000314086	+
CL2420.Contig2	190 1548 minus strand hypothetical protein ARALYDRAFT_491537 [Arabidopsis lyrata subsp. lyrata] >gi|297313102|gb|EFH43525.1| hypothetical protein ARALYDRAFT_491537 [Arabidopsis lyrata subsp. lyrata]	CL2420.Contig4	12	239	1.607	*	+	CL2420.Contig2	comp30311_c0_seq1	-34.2894	2.03e-05	-
CL1086.Contig3	1 778 LEN=1019; minus strand; translated		9	255	1.672	*	+	CL1086.Contig3	comp24171_c0_seq1	-7.49635	3.32e-11	-
CL2762.Contig2	142 1017 minus strand xyloglucan endotransglycosylase [Brassica rapa subsp. pekinensis]		13	409	0.833	*	-	CL2762.Contig2	comp24514_c0_seq1	4.1866	2.35e-06	+
CL14463.Contig1	3 1184 glycosyl hydrolase family 17 protein [Arabidopsis lyrata subsp. lyrata] >gi|297330482|gb|EFH60901.1| glycosyl hydrolase family 17 protein [Arabidopsis lyrata subsp. lyrata]	CL14463.Contig2	12	263	0.657	*	-	CL14463.Contig1	comp24695_c0_seq1	4.07486	6.51e-06	+
CL603.Contig2	206 1567 minus strand TPX2 (targeting protein for Xklp2)-like protein [Arabidopsis thaliana] >gi|16209720|gb|AAL14415.1| At2g35880/F11F19.21 [Arabidopsis thaliana] >gi|20197995|gb|AAD21469.2| expressed protein [Arabidopsis thaliana] >gi|33025407	Unigene28793	6	167	1.589	*	+	CL603.Contig2	comp29116_c0_seq2	-33.8534	0.000128561	-
Unigene14332	103 1545 minus strand hypothetical protein ARALYDRAFT_481718 [Arabidopsis lyrata subsp. lyrata] >gi|297326801|gb|EFH57221.1| hypothetical protein ARALYDRAFT_481718 [Arabidopsis lyrata subsp. lyrata]		9	268	1.512	*	+	Unigene14332	comp33233_c0_seq1	-3.03064	0.00024537	-
CL2397.Contig1	95 1312 60S ribosomal protein L4-1 [Arabidopsis thaliana] >gi|17369604|sp|Q9SF40.1|RL4A_ARATH RecName: Full=60S ribosomal protein L4-1; Short=L1 >gi|15982715|gb|AAL09727.1| AT3g09630/F11F8_22 [Arabidopsis thaliana] >gi|30725664|gb|AAP37854.1| At3		13	626	1.708	*	+	CL2397.Contig1	comp31482_c0_seq5	-37.5241	1.17e-12	-
CL11072.Contig3	37 1005 unnamed protein product [Thellungiella halophila]		13	425	0.599	*	-	CL11072.Contig3	comp29960_c0_seq1	3.40308	0.000543267	+
Unigene282	77 517 minus strand hypothetical protein ARALYDRAFT_495701 [Arabidopsis lyrata subsp. lyrata] >gi|297310272|gb|EFH40696.1| hypothetical protein ARALYDRAFT_495701 [Arabidopsis lyrata subsp. lyrata]	Unigene1398 CL1840.Contig3 CL1840.Contig7 CL1840.Contig8 CL13308.Contig1 CL13308.Contig2 CL13308.Contig3 Unigene24894	6	104	0.717	*	-	Unigene282	comp32636_c0_seq1	3.56071	4.29e-05	+
DEGs_NDEPs (343)
Protein	Description	Sameset	Pep_num	Score	Quantition(CK_all_results/pb-1000)	Sig	diff_Protein	GeneID&ProteinID	GeneID	log2(CK_all_results/pb-1000)	Fdr	diff_gene
Unigene13940	1 2622 uncharacterized protein [Arabidopsis thaliana] >gi|332191928|gb|AEE30049.1| uncharacterized protein [Arabidopsis thaliana]		8	428	1.658	*	+	Unigene13940	comp24349_c0_seq1	-1.68229	0.101382
Unigene22796	67 591 cobalt ion binding protein [Arabidopsis thaliana] >gi|30698791|ref|NP_849876.1| cobalt ion binding protein [Arabidopsis thaliana] >gi|332197065|gb|AEE35186.1| cobalt ion binding protein [Arabidopsis thaliana] >gi|332197066|gb|AEE35187.1| c		6	189	0.544	*	-	Unigene22796	comp14284_c0_seq1	0.151589	0.956499
Unigene20420	1 2307 predicted protein [Arabidopsis lyrata subsp. lyrata] >gi|297316406|gb|EFH46829.1| predicted protein [Arabidopsis lyrata subsp. lyrata]		10	288	1.296	*	+	Unigene20420	comp22532_c0_seq1	1.8791	0.171833
CL3624.Contig1	52 297 minus strand 40S ribosomal protein S19-3 [Arabidopsis thaliana] >gi|297793669|ref|XP_002864719.1| 40S ribosomal protein S19 [Arabidopsis lyrata subsp. lyrata] >gi|27923837|sp|Q9FNP8.1|RS193_ARATH RecName: Full=40S ribosomal protein S19-3		5	148	0.605	*	-	CL3624.Contig1	comp55477_c0_seq1	-32.1817	0.0251893
CL6151.Contig2	13 543 hypothetical protein ARALYDRAFT_481517 [Arabidopsis lyrata subsp. lyrata] >gi|297324816|gb|EFH55236.1| hypothetical protein ARALYDRAFT_481517 [Arabidopsis lyrata subsp. lyrata]		5	107	2.037	*	+	CL6151.Contig2	comp18415_c0_seq2	1.79164	0.356935
CL5731.Contig2	94 993 galactose oxidase/kelch repeat-containing protein [Arabidopsis thaliana] >gi|11692832|gb|AAG40019.1|AF324668_1 MLP3.17 [Arabidopsis thaliana] >gi|14517448|gb|AAK62614.1| AT3g07720/F17A17_6 [Arabidopsis thaliana] >gi|23507767|gb|AAN38687.1|	CL5731.Contig3	7	117	0.636	*	-	CL5731.Contig2	comp31814_c0_seq6	-1.08114	0.22887
CL5706.Contig1	47 2266 minus strand Transketolase [Arabidopsis thaliana] >gi|332646582|gb|AEE80103.1| Transketolase [Arabidopsis thaliana]		2	1069	1.87	*	+	CL5706.Contig1	comp31218_c0_seq2	-0.649543	0.536137
Unigene29764	2 724 minus strand hypothetical protein ARALYDRAFT_485973 [Arabidopsis lyrata subsp. lyrata] >gi|297322142|gb|EFH52563.1| hypothetical protein ARALYDRAFT_485973 [Arabidopsis lyrata subsp. lyrata]		14	397	1.715	*	+	Unigene29764	comp136334_c0_seq1	1.79164	0.643979
Unigene6860	280 753 At1g47960/T2J15_13 [Arabidopsis thaliana] >gi|15810209|gb|AAL07005.1| At1g47960/T2J15_13 [Arabidopsis thaliana] >gi|19699120|gb|AAL90926.1| At1g47960/T2J15_13 [Arabidopsis thaliana]		3	159	0.563	*	-	Unigene6860	comp21578_c0_seq1	0.569248	0.903577
CL83.Contig1	553 690 minus strand ubiquitin-conjugating enzyme E2 variant 1D [Arabidopsis thaliana] >gi|332645439|gb|AEE78960.1| ubiquitin-conjugating enzyme E2 variant 1D [Arabidopsis thaliana]		2	42	1.208	*	+	CL83.Contig1	comp29637_c0_seq5	0.824103	0.44502
CL1809.Contig16	87 665 minus strand uncharacterized protein [Arabidopsis thaliana] >gi|332191687|gb|AEE29808.1| uncharacterized protein [Arabidopsis thaliana]		4	145	0.434	*	-	CL1809.Contig16	comp28013_c0_seq25	1.52102	0.105366
CL12178.Contig1	83 856 protein-l-isoaspartate O-methyltransferase [Arabidopsis lyrata subsp. lyrata] >gi|297323445|gb|EFH53866.1| protein-l-isoaspartate O-methyltransferase [Arabidopsis lyrata subsp. lyrata]	CL12178.Contig2	17	619	0.69	*	-	CL12178.Contig1	comp23494_c0_seq1	0.416131	0.760628
Unigene6665	74 1363 glycosyl hydrolase family 17 protein [Arabidopsis lyrata subsp. lyrata] >gi|297311328|gb|EFH41752.1| glycosyl hydrolase family 17 protein [Arabidopsis lyrata subsp. lyrata]		20	779	0.642	*	-	Unigene6665	comp33308_c0_seq1	2.11837	0.0117072
CL292.Contig1	87 2066 minus strand hypothetical protein ARALYDRAFT_475871 [Arabidopsis lyrata subsp. lyrata] >gi|297334457|gb|EFH64875.1| hypothetical protein ARALYDRAFT_475871 [Arabidopsis lyrata subsp. lyrata]		11	299	1.252	*	+	CL292.Contig1	comp21826_c0_seq1	0.526544	0.948145
Unigene16718	1 801 minus strand lectin-like protein [Arabidopsis thaliana] >gi|7378615|emb|CAB83291.1| protein kinase-like [Arabidopsis thaliana] >gi|51972156|gb|AAU15182.1| At5g03350 [Arabidopsis thaliana] >gi|332003207|gb|AED90590.1| lectin-like protein [A		5	178	0.562	*	-	Unigene16718	comp17359_c0_seq1	-2.58853	0.041623
CL10729.Contig1	151 1767 minus strand hypothetical protein ARALYDRAFT_337380 [Arabidopsis lyrata subsp. lyrata] >gi|297337526|gb|EFH67943.1| hypothetical protein ARALYDRAFT_337380 [Arabidopsis lyrata subsp. lyrata]		12	303	1.336	*	+	CL10729.Contig1	comp22854_c0_seq3	5.22719	0.00777489
CL4340.Contig1	122 1063 glyoxalase II 3 [Arabidopsis thaliana] >gi|334302900|sp|Q9C8L4.3|GLO2O_ARATH RecName: Full=Hydroxyacylglutathione hydrolase 3, mitochondrial; AltName: Full=Glyoxalase II; Short=Glx II; Flags: Precursor >gi|332194844|gb|AEE32965.1| glyoxa	CL4340.Contig3 CL4340.Contig4 CL4340.Contig5 CL4340.Contig6 CL4340.Contig7 CL4340.Contig8 CL4340.Contig9	36	1079	0.83	*	-	CL4340.Contig1	comp65493_c0_seq1	-0.0828287	1
CL12795.Contig1	99 779 minus strand succinate dehydrogenase 5 [Arabidopsis thaliana] >gi|25091506|sp|Q9SX77.1|UMP6_ARATH RecName: Full=Uncharacterized protein At1g47420, mitochondrial; Flags: Precursor >gi|5668814|gb|AAD46040.1|AC007519_25 ESTs gb|H36253 and gb		14	478	1.227	*	+	CL12795.Contig1	comp25853_c0_seq1	0.110398	0.983928
CL1202.Contig12	119 1294 minus strand ThiJ-like protein [Brassica rapa subsp. pekinensis]	CL1202.Contig13	29	884	2.192	*	+	CL1202.Contig12	comp20971_c0_seq1	-1.74976	0.0512628
CL6345.Contig1	156 2018 minus strand hypothetical protein ARALYDRAFT_906663 [Arabidopsis lyrata subsp. lyrata] >gi|297322008|gb|EFH52429.1| hypothetical protein ARALYDRAFT_906663 [Arabidopsis lyrata subsp. lyrata]		4	190	0.643	*	-	CL6345.Contig1	comp73613_c0_seq1	1.20668	0.650873
CL9121.Contig1	5 2989 minus strand unnamed protein product [Thellungiella halophila]		9	231	1.534	*	+	CL9121.Contig1	comp26989_c0_seq1	1.21059	0.205076
Unigene6569	216 713 minus strand hypothetical protein ARALYDRAFT_483759 [Arabidopsis lyrata subsp. lyrata] >gi|297326058|gb|EFH56478.1| hypothetical protein ARALYDRAFT_483759 [Arabidopsis lyrata subsp. lyrata]		13	446	0.672	*	-	Unigene6569	comp12626_c0_seq1	-3.11525	0.0570073
Unigene2385	68 883 minus strand cyclase family protein [Arabidopsis lyrata subsp. lyrata] >gi|297314934|gb|EFH45357.1| cyclase family protein [Arabidopsis lyrata subsp. lyrata]		8	112	0.555	*	-	Unigene2385	comp29408_c0_seq1	-2.61242	0.00492136
CL12221.Contig1	56 1291 minus strand hypothetical protein ARALYDRAFT_479366 [Arabidopsis lyrata subsp. lyrata] >gi|297331106|gb|EFH61525.1| hypothetical protein ARALYDRAFT_479366 [Arabidopsis lyrata subsp. lyrata]		10	269	1.674	*	+	CL12221.Contig1	comp22191_c0_seq1	-0.41481	0.889098
CL9875.Contig2	43 2361 Subtilase family protein [Arabidopsis thaliana] >gi|11994380|dbj|BAB02339.1| cucumisin-like serine protease; subtilisin-like protease [Arabidopsis thaliana] >gi|44917461|gb|AAS49055.1| At3g14067 [Arabidopsis thaliana] >gi|45773916|gb|AAS7		6	206	0.625	*	-	CL9875.Contig2	comp42992_c0_seq1	0.0754334	1
CL4590.Contig3	126 683 unnamed protein product [Thellungiella halophila]		10	145	0.606	*	-	CL4590.Contig3	comp33568_c0_seq1	-0.24054	0.901278
Unigene29769	19 1458 unnamed protein product [Thellungiella halophila]		9	257	0.539	*	-	Unigene29769	comp24488_c0_seq2	-1.28636	0.180831
CL2627.Contig2	1 369 AT2G16430 [Arabidopsis thaliana]		2	69	1.49	*	+	CL2627.Contig2	comp19448_c0_seq1	0.649045	0.561309
CL375.Contig1	101 625 minus strand 60S ribosomal protein L17-2 [Arabidopsis thaliana] >gi|297838479|ref|XP_002887121.1| 60S ribosomal protein L17 [Arabidopsis lyrata subsp. lyrata] >gi|27735241|sp|P51413.2|RL172_ARATH RecName: Full=60S ribosomal protein L17-2		12	325	1.973	*	+	CL375.Contig1	comp29550_c0_seq5	1.18771	0.187827
CL13594.Contig2	4 942 minus strand phosphoglycerate mutase-like protein [Arabidopsis thaliana] >gi|332195407|gb|AEE33528.1| phosphoglycerate mutase-like protein [Arabidopsis thaliana]		2	82	0.627	*	-	CL13594.Contig2	comp22656_c0_seq1	1.46075	0.210417
Unigene999	360 2507 minus strand TIF3B1 [Arabidopsis lyrata subsp. lyrata] >gi|297318101|gb|EFH48523.1| TIF3B1 [Arabidopsis lyrata subsp. lyrata]		11	284	2.11	*	+	Unigene999	comp31282_c0_seq1	-0.222002	0.903022
CL1396.Contig2	73 1521 minus strand hypothetical protein ARALYDRAFT_474037 [Arabidopsis lyrata subsp. lyrata] >gi|297337305|gb|EFH67722.1| hypothetical protein ARALYDRAFT_474037 [Arabidopsis lyrata subsp. lyrata]		9	268	1.814	*	+	CL1396.Contig2	comp33717_c0_seq1	-0.69591	0.522362
CL816.Contig1	120 2585 hypothetical protein ARALYDRAFT_492441 [Arabidopsis lyrata subsp. lyrata] >gi|297313513|gb|EFH43936.1| hypothetical protein ARALYDRAFT_492441 [Arabidopsis lyrata subsp. lyrata]		22	562	1.34	*	+	CL816.Contig1	comp29816_c0_seq6	-32.6702	0.00777489
Unigene23022	2 1231 minus strand hypothetical protein ARALYDRAFT_473822 [Arabidopsis lyrata subsp. lyrata] >gi|297337138|gb|EFH67555.1| hypothetical protein ARALYDRAFT_473822 [Arabidopsis lyrata subsp. lyrata]		11	290	0.44	*	-	Unigene23022	comp29331_c0_seq1	0.0149405	1
CL4902.Contig10	138 1490 minus strand beta-Ig-H3 domain-containing protein [Arabidopsis lyrata subsp. lyrata] >gi|297328584|gb|EFH59003.1| beta-Ig-H3 domain-containing protein [Arabidopsis lyrata subsp. lyrata]	CL4902.Contig12 CL4902.Contig3 CL4902.Contig5 CL4902.Contig6 Unigene27332 Unigene27333	7	182	2.943	*	+	CL4902.Contig10	comp31017_c1_seq1	1.05331	0.300455
Unigene6583	67 342 minus strand 60S ribosomal protein L37a-2 [Arabidopsis thaliana] >gi|297817320|ref|XP_002876543.1| 60S ribosomal protein L37a [Arabidopsis lyrata subsp. lyrata] >gi|75247667|sp|Q8RXU5.1|R37A2_ARATH RecName: Full=60S ribosomal protein L37a	Unigene17683	6	291	1.274	*	+	Unigene6583	comp13857_c0_seq1	0.864998	0.388716
Unigene2988	158 1576 minus strand glycosyl hydrolase family 17 protein [Arabidopsis lyrata subsp. lyrata] >gi|297334120|gb|EFH64538.1| glycosyl hydrolase family 17 protein [Arabidopsis lyrata subsp. lyrata]		15	583	0.726	*	-	Unigene2988	comp7330_c0_seq1	-2.79332	0.353433
CL12963.Contig1	143 883 ribonuclease T2 family protein [Arabidopsis lyrata subsp. lyrata] >gi|297338637|gb|EFH69054.1| ribonuclease T2 family protein [Arabidopsis lyrata subsp. lyrata]	CL12963.Contig2	4	95	0.291	*	-	CL12963.Contig1	comp30065_c0_seq5	2.79164	0.00494883
CL12448.Contig2	100 1680 minus strand predicted protein [Arabidopsis lyrata subsp. lyrata] >gi|297328045|gb|EFH58464.1| predicted protein [Arabidopsis lyrata subsp. lyrata]		6	146	1.278	*	+	CL12448.Contig2	comp83960_c0_seq1	0.79164	0.889098
Unigene20348	3 1211 minus strand uncharacterized protein [Arabidopsis thaliana] >gi|15146232|gb|AAK83599.1| At1g65900/F12P19_7 [Arabidopsis thaliana] >gi|19699144|gb|AAL90938.1| At1g65900/F12P19_7 [Arabidopsis thaliana] >gi|332196317|gb|AEE34438.1| uncharact		10	306	0.64	*	-	Unigene20348	comp30214_c0_seq1	0.808319	0.460787
CL13719.Contig1	221 1900 minus strand cytosolic phosphoglucose isomerase [Arabidopsis thaliana]		9	240	1.36	*	+	CL13719.Contig1	comp28904_c0_seq1	-0.975382	0.293931
CL4589.Contig1	109 936 hypothetical protein ARALYDRAFT_488714 [Arabidopsis lyrata subsp. lyrata] >gi|297319728|gb|EFH50150.1| hypothetical protein ARALYDRAFT_488714 [Arabidopsis lyrata subsp. lyrata]		5	169	0.416	*	-	CL4589.Contig1	comp24657_c0_seq1	-1.25567	0.185742
Unigene14093	147 590 minus strand hypothetical protein ARALYDRAFT_481805 [Arabidopsis lyrata subsp. lyrata] >gi|297326858|gb|EFH57278.1| hypothetical protein ARALYDRAFT_481805 [Arabidopsis lyrata subsp. lyrata]		7	308	0.688	*	-	Unigene14093	comp24064_c0_seq1	-0.454185	1
CL11361.Contig1	3 1100 unnamed protein product [Thellungiella halophila]		5	74	1.737	*	+	CL11361.Contig1	comp30310_c0_seq4	-0.863367	0.409483
Unigene22434	1 249 beta-fructofuranosidase, insoluble isoenzyme CWINV3 [Arabidopsis thaliana] >gi|332195067|gb|AEE33188.1| beta-fructofuranosidase, insoluble isoenzyme CWINV3 [Arabidopsis thaliana]		4	59	0.566	*	-	Unigene22434	comp25428_c0_seq1	0.844979	0.478904
CL3587.Contig3	93 917 minus strand 20S proteasome subunit PAF1 [Arabidopsis thaliana]		10	425	0.744	*	-	CL3587.Contig3	comp64596_c0_seq1	1.3766	0.586561
Unigene24015	59 280 NEDD8-like protein RUB1 [Arabidopsis thaliana] >gi|302393813|sp|Q9SHE7.3|RUB1_ARATH RecName: Full=Ubiquitin-NEDD8-like protein RUB1; Contains: RecName: Full=Ubiquitin; Contains: RecName: Full=NEDD8-like protein RUB1; AltName: Full=Ubiquiti	Unigene26885 Unigene26886	2	111	1.629	*	+	Unigene24015	comp23780_c0_seq5	33.2513	0.00108402
CL7481.Contig1	3 989 minus strand hypothetical protein ARALYDRAFT_473479 [Arabidopsis lyrata subsp. lyrata] >gi|297339591|gb|EFH70008.1| hypothetical protein ARALYDRAFT_473479 [Arabidopsis lyrata subsp. lyrata]		6	243	0.422	*	-	CL7481.Contig1	comp74606_c0_seq1	-4.01571	0.0299205
CL8554.Contig2	199 714 uncharacterized protein [Arabidopsis thaliana] >gi|15081622|gb|AAK82466.1| AT3g07470/F21O3_18 [Arabidopsis thaliana] >gi|27363316|gb|AAO11577.1| At3g07470/F21O3_18 [Arabidopsis thaliana] >gi|332641026|gb|AEE74547.1| uncharacterized protei		12	424	0.677	*	-	CL8554.Contig2	comp21539_c0_seq2	-2.01571	0.461399
Unigene24148	27 1094 Xylem cysteine proteinase 1 [Arabidopsis thaliana] >gi|71153408|sp|O65493.1|XCP1_ARATH RecName: Full=Xylem cysteine proteinase 1; Short=AtXCP1; Flags: Precursor >gi|6708181|gb|AAF25831.1|AF191027_1 papain-type cysteine endopeptidase XCP1		4	107	0.566	*	-	Unigene24148	comp27347_c2_seq1	1.92734	0.0233013
CL1149.Contig2	93 863 hypothetical protein ARALYDRAFT_480966 [Arabidopsis lyrata subsp. lyrata] >gi|297324375|gb|EFH54795.1| hypothetical protein ARALYDRAFT_480966 [Arabidopsis lyrata subsp. lyrata]		9	265	1.217	*	+	CL1149.Contig2	comp30078_c0_seq2	0.163311	0.947345
CL3864.Contig1	64 1038 minus strand predicted protein [Arabidopsis lyrata subsp. lyrata] >gi|297315228|gb|EFH45651.1| predicted protein [Arabidopsis lyrata subsp. lyrata]		18	560	0.679	*	-	CL3864.Contig1	comp20935_c0_seq1	-1.26281	0.171614
Unigene230	1 1458 mitochondrial chaperonin (HSP60) [Arabidopsis thaliana]		3	826	1.308	*	+	Unigene230	comp16600_c0_seq1	0.154211	1
Unigene19215	93 365 minus strand RecName: Full=Acyl-CoA-binding protein; Short=ACBP >gi|509265|emb|CAA54390.1| acyl-CoA binding protein [Brassica napus]		3	64	1.543	*	+	Unigene19215	comp20649_c0_seq4	2.19818	0.0082969
CL6783.Contig1	309 1400 unnamed protein product [Thellungiella halophila]	Unigene28654	21	650	0.819	*	-	CL6783.Contig1	comp924_c0_seq1	-31.1817	0.205076
CL13224.Contig1	141 1757 putative protein [Arabidopsis thaliana] >gi|7270051|emb|CAB79866.1| putative protein [Arabidopsis thaliana]		2	56	1.983	*	+	CL13224.Contig1	comp32084_c0_seq16	1.25396	0.363195
CL7135.Contig2	2 1156 hypothetical protein ARALYDRAFT_477124 [Arabidopsis lyrata subsp. lyrata] >gi|297335094|gb|EFH65512.1| hypothetical protein ARALYDRAFT_477124 [Arabidopsis lyrata subsp. lyrata]	CL7135.Contig5	4	2016	1.765	*	+	CL7135.Contig2	comp75148_c0_seq1	0.528606	0.863482
CL9411.Contig1	166 2571 MRH5/SHV3 [Arabidopsis lyrata subsp. lyrata] >gi|297313382|gb|EFH43805.1| MRH5/SHV3 [Arabidopsis lyrata subsp. lyrata]	CL9411.Contig3	8	862	0.745	*	-	CL9411.Contig1	comp30746_c1_seq3	-1.20051	0.187748
CL3088.Contig1	77 1861 26S proteasome regulatory subunit N1 [Arabidopsis thaliana] >gi|75265911|sp|Q9SIV2.2|RPN1A_ARATH RecName: Full=26S proteasome non-ATPase regulatory subunit 2 1A; AltName: Full=26S proteasome regulatory subunit RPN1 A; Short=AtRPN1a; AltNa		9	277	1.406	*	+	CL3088.Contig1	comp18932_c1_seq1	0.113569	1
Unigene18743	50 817 minus strand peptidylprolyl isomerase-like protein [Arabidopsis thaliana]		15	538	0.661	*	-	Unigene18743	comp78350_c0_seq1	-0.530288	1
CL5855.Contig2	208 1638 tetratricopeptide repeat domain-containing protein [Arabidopsis thaliana] >gi|44917447|gb|AAS49048.1| At3g16760 [Arabidopsis thaliana] >gi|50253544|gb|AAT71974.1| At3g16760 [Arabidopsis thaliana] >gi|332642341|gb|AEE75862.1| tetratricope		7	185	1.498	*	+	CL5855.Contig2	comp30813_c0_seq2	0.377587	0.780368
CL4030.Contig1	155 1105 korean-radish isoperoxidase [Raphanus sativus]		17	920	0.422	*	-	CL4030.Contig1	comp22036_c0_seq1	0.0315912	1
CL2179.Contig1	1 1392 hypothetical protein ARALYDRAFT_477651 [Arabidopsis lyrata subsp. lyrata] >gi|297328162|gb|EFH58581.1| hypothetical protein ARALYDRAFT_477651 [Arabidopsis lyrata subsp. lyrata]		7	215	1.303	*	+	CL2179.Contig1	comp30360_c0_seq2	0.79164	0.456958
CL9354.Contig1	83 544 minus strand unnamed protein product [Thellungiella halophila]	CL9354.Contig2	8	151	1.255	*	+	CL9354.Contig1	comp31163_c1_seq1	0.474778	0.723541
CL9552.Contig2	134 2407 minus strand hypothetical protein ARALYDRAFT_473159 [Arabidopsis lyrata subsp. lyrata] >gi|297339411|gb|EFH69828.1| hypothetical protein ARALYDRAFT_473159 [Arabidopsis lyrata subsp. lyrata]		5	123	1.571	*	+	CL9552.Contig2	comp24165_c2_seq1	2.38582	0.00784455
Unigene10559	60 200 early nodulin-like protein 1 [Arabidopsis thaliana] >gi|109946411|gb|ABG48384.1| At5g53870 [Arabidopsis thaliana] >gi|332009038|gb|AED96421.1| early nodulin-like protein 1 [Arabidopsis thaliana]		3	40	0.56	*	-	Unigene10559	comp16714_c0_seq1	-4.01571	0.0299205
Unigene840	128 907 minus strand GF14 omega [Brassica napus]	Unigene2504 Unigene27157	4	411	1.462	*	+	Unigene840	comp30542_c3_seq2	1.67938	0.0529422
Unigene13679	81 1004 minus strand NmrA-like negative transcriptional regulator family protein [Arabidopsis thaliana] >gi|4914435|emb|CAB43638.1| NAD(P)H oxidoreductase, isoflavone reductase-like protein [Arabidopsis thaliana] >gi|7270906|emb|CAB80586.1| NAD(		4	127	0.412	*	-	Unigene13679	comp34764_c0_seq1	-0.383038	0.79106
Unigene22583	103 444 minus strand RecName: Full=Probable beta-D-xylosidase 6; Short=AtBXL6; Flags: Precursor >gi|7671447|emb|CAB89387.1| beta-xylosidase-like protein [Arabidopsis thaliana] >gi|15982753|gb|AAL09717.1| AT5g10560/F12B17_90 [Arabidopsis thaliana		3	115	0.239	*	-	Unigene22583	comp27961_c0_seq1	0.616357	0.58414
Unigene28650	39 1061 SLL2-S9-protein [Brassica rapa]		7	101	0.78	*	-	Unigene28650	comp27455_c0_seq1	32.3396	0.0184434
Unigene26860	109 2796 minus strand translation initiation factor eIF-3 subunit 8 [Arabidopsis thaliana] >gi|334186011|ref|NP_001190102.1| translation initiation factor eIF-3 subunit 8 [Arabidopsis thaliana] >gi|23503063|sp|O49160.2|EIF3C_ARATH RecName: Full=		12	438	1.66	*	+	Unigene26860	comp29590_c0_seq1	0.577046	0.615149
CL9766.Contig2	2 940 glycosyl transferase, family 35 protein [Arabidopsis thaliana] >gi|11994512|dbj|BAB02576.1| glycogen phosphorylase B; starch phosphorylase [Arabidopsis thaliana] >gi|15146189|gb|AAK83578.1| AT3g29320/MUO10_2 [Arabidopsis thaliana] >gi|27764		14	356	1.562	*	+	CL9766.Contig2	comp31472_c0_seq4	0.931794	0.403013
CL779.Contig1	245 676 minus strand high mobility group B2 protein [Brassica napus]	CL779.Contig2 CL779.Contig3 CL779.Contig4 Unigene23441	7	341	1.737	*	+	CL779.Contig1	comp1_c0_seq1	-1.20836	0.606426
CL5193.Contig1	108 1859 minus strand pyruvate kinase [Arabidopsis thaliana] >gi|75309198|sp|Q9FLW9.1|PKP2_ARATH RecName: Full=Plastidial pyruvate kinase 2; Short=PKp2; AltName: Full=Plastidial pyruvate kinase 1; Short=PKP1; AltName: Full=Pyruvate kinase III; A	CL5193.Contig2	5	194	1.667	*	+	CL5193.Contig1	comp31806_c0_seq1	-0.672947	0.528077
CL24.Contig2	102 2297 hypothetical protein ARALYDRAFT_474357 [Arabidopsis lyrata subsp. lyrata] >gi|297337535|gb|EFH67952.1| hypothetical protein ARALYDRAFT_474357 [Arabidopsis lyrata subsp. lyrata]		7	265	1.851	*	+	CL24.Contig2	comp29199_c0_seq1	0.454605	0.77192
CL3612.Contig1	130 2976 hypothetical protein ARALYDRAFT_480836 [Arabidopsis lyrata subsp. lyrata] >gi|297332091|gb|EFH62510.1| hypothetical protein ARALYDRAFT_480836 [Arabidopsis lyrata subsp. lyrata]		9	724	1.882	*	+	CL3612.Contig1	comp15287_c0_seq1	1.3766	0.586561
Unigene25466	115 1554 glycosyl hydrolase family 17 protein [Arabidopsis lyrata subsp. lyrata] >gi|297312085|gb|EFH42509.1| glycosyl hydrolase family 17 protein [Arabidopsis lyrata subsp. lyrata]		12	230	0.659	*	-	Unigene25466	comp30248_c1_seq1	1.85643	0.0377881
CL11043.Contig1	123 1295 Pectinacetylesterase family protein [Arabidopsis thaliana] >gi|332658777|gb|AEE84177.1| Pectinacetylesterase family protein [Arabidopsis thaliana]		17	585	0.637	*	-	CL11043.Contig1	comp27823_c0_seq1	-0.0267718	1
CL5423.Contig3	200 2701 minus strand unnamed protein product [Arabidopsis thaliana]	CL5423.Contig4	10	264	0.806	*	-	CL5423.Contig3	comp31795_c0_seq4	-0.615079	0.714256
Unigene25834	2 346 heat shock protein 70 like protein [Arabidopsis thaliana] >gi|7270774|emb|CAB80456.1| heat shock protein 70 like protein [Arabidopsis thaliana]		4	230	1.962	*	+	Unigene25834	comp31038_c0_seq2	0.889827	0.353816
CL6941.Contig3	155 1465 hypothetical protein ARALYDRAFT_485414 [Arabidopsis lyrata subsp. lyrata] >gi|297323597|gb|EFH54018.1| hypothetical protein ARALYDRAFT_485414 [Arabidopsis lyrata subsp. lyrata]		4	85	1.319	*	+	CL6941.Contig3	comp12433_c0_seq1	2.599	0.257553
Unigene19731	21 380 minus strand hypothetical protein ARALYDRAFT_918901 [Arabidopsis lyrata subsp. lyrata] >gi|297312034|gb|EFH42458.1| hypothetical protein ARALYDRAFT_918901 [Arabidopsis lyrata subsp. lyrata]		27	1010	1.448	*	+	Unigene19731	comp26515_c0_seq1	1.11674	0.210163
CL959.Contig2	61 1044 minus strand hypothetical protein ARALYDRAFT_496608 [Arabidopsis lyrata subsp. lyrata] >gi|297312431|gb|EFH42855.1| hypothetical protein ARALYDRAFT_496608 [Arabidopsis lyrata subsp. lyrata]		33	1062	0.656	*	-	CL959.Contig2	comp14558_c0_seq1	-33.0305	0.00275059
CL13447.Contig1	79 1017 plant UBX domain-containing protein 4 [Arabidopsis lyrata subsp. lyrata] >gi|297318521|gb|EFH48943.1| plant UBX domain-containing protein 4 [Arabidopsis lyrata subsp. lyrata]		16	553	0.757	*	-	CL13447.Contig1	comp25746_c1_seq1	-0.496791	0.680919
CL4431.Contig1	46 687 minus strand trypsin inhibitor propeptide [Brassica oleracea]		23	539	0.797	*	-	CL4431.Contig1	comp33982_c0_seq1	-1.43262	0.104039
CL8050.Contig1	4 1116 minus strand unnamed protein product [Thellungiella halophila]		29	676	0.681	*	-	CL8050.Contig1	comp32881_c0_seq1	0.840221	0.381648
Unigene22050	264 1085 hypothetical protein ARALYDRAFT_495848 [Arabidopsis lyrata subsp. lyrata] >gi|297312043|gb|EFH42467.1| hypothetical protein ARALYDRAFT_495848 [Arabidopsis lyrata subsp. lyrata]		6	240	0.459	*	-	Unigene22050	comp9456_c0_seq1	-0.113723	1
Unigene2216	3 362 60S ribosomal protein L34-1 [Arabidopsis thaliana] >gi|2500376|sp|Q42351.1|RL341_ARATH RecName: Full=60S ribosomal protein L34-1 >gi|4262177|gb|AAD14494.1| 60s ribosomal protein L34 [Arabidopsis thaliana] >gi|332192632|gb|AEE30753.1| 60S ri	Unigene20033 Unigene20780	5	217	2.336	*	+	Unigene2216	comp21493_c0_seq1	-33.3192	0.00108402
CL2476.Contig1	75 2507 minus strand RecName: Full=Phospholipase D alpha 2; Short=PLD 2; AltName: Full=Choline phosphatase 2; AltName: Full=Phosphatidylcholine-hydrolyzing phospholipase D 2; Flags: Precursor >gi|3639087|gb|AAC78486.1| phospholipase D2 [Brassica		19	1320	1.698	*	+	CL2476.Contig1	comp31055_c0_seq3	-1.0746	0.388915
CL4806.Contig2	55 972 protein EXORDIUM like 2 [Arabidopsis thaliana] >gi|14190477|gb|AAK55719.1|AF380638_1 AT5g64260/MSJ1_10 [Arabidopsis thaliana] >gi|9759402|dbj|BAB09857.1| phi-1-like protein [Arabidopsis thaliana] >gi|16323270|gb|AAL15369.1| AT5g64260/MSJ1_		4	192	0.536	*	-	CL4806.Contig2	comp64311_c0_seq1	-0.793322	0.779355
CL105.Contig4	124 1578 S-adenosyl-L-homocystein hydrolase [Arabidopsis thaliana]		72	1672	1.843	*	+	CL105.Contig4	comp29878_c0_seq4	1.03421	0.247737
CL819.Contig1	109 654 minus strand 60S ribosomal protein L11-2 [Arabidopsis thaliana] >gi|18415161|ref|NP_567563.1| 60S ribosomal protein L11-2 [Arabidopsis thaliana] >gi|30694822|ref|NP_568649.2| 60S ribosomal protein L11-2 [Arabidopsis thaliana] >gi|2773523	CL819.Contig4 CL819.Contig5 CL819.Contig6	12	277	1.471	*	+	CL819.Contig1	comp28217_c0_seq3	1.04487	0.309551
CL6224.Contig1	1 2364 minus strand beta-galactosidase [Raphanus sativus]		15	576	0.473	*	-	CL6224.Contig1	comp31424_c0_seq1	2.35332	0.0048704
Unigene2696	6 1547 minus strand leucine-rich repeat-like protein [Arabidopsis thaliana] >gi|44681384|gb|AAS47632.1| At1g49750 [Arabidopsis thaliana] >gi|45773904|gb|AAS76756.1| At1g49750 [Arabidopsis thaliana] >gi|222423160|dbj|BAH19559.1| AT1G49750 [Arabid		7	113	0.652	*	-	Unigene2696	comp30908_c0_seq3	-0.625752	0.582274
Unigene25700	2 2614 minus strand glycosyl hydrolase family 38 protein [Arabidopsis lyrata subsp. lyrata] >gi|297317431|gb|EFH47853.1| glycosyl hydrolase family 38 protein [Arabidopsis lyrata subsp. lyrata]		21	600	0.572	*	-	Unigene25700	comp31343_c1_seq1	0.082478	1
CL10110.Contig2	61 1329 minus strand hypothetical protein ARALYDRAFT_888076 [Arabidopsis lyrata subsp. lyrata] >gi|297338299|gb|EFH68716.1| hypothetical protein ARALYDRAFT_888076 [Arabidopsis lyrata subsp. lyrata]		6	238	2.147	*	+	CL10110.Contig2	comp24392_c0_seq1	-1.47885	0.0905277
Unigene18548	3 455 hypothetical protein ARALYDRAFT_485150 [Arabidopsis lyrata subsp. lyrata] >gi|297323419|gb|EFH53840.1| hypothetical protein ARALYDRAFT_485150 [Arabidopsis lyrata subsp. lyrata]		4	82	0.498	*	-	Unigene18548	comp31741_c0_seq44	0.365711	0.844095
CL11402.Contig1	110 1198 reversibly glycosylated polypeptide-3 [Arabidopsis lyrata subsp. lyrata] >gi|297317514|gb|EFH47936.1| reversibly glycosylated polypeptide-3 [Arabidopsis lyrata subsp. lyrata]	CL11402.Contig2	14	459	1.784	*	+	CL11402.Contig1	comp31003_c0_seq4	-0.798975	0.510247
Unigene27835	127 744 minus strand cold induced protein [Brassica rapa]		6	321	1.981	*	+	Unigene27835	comp11430_c0_seq1	0.71764	0.690501
Unigene8067	114 1253 minus strand GDSL esterase/lipase [Arabidopsis thaliana] >gi|75273423|sp|Q9LIN2.1|GDL53_ARATH RecName: Full=GDSL esterase/lipase At3g26430; AltName: Full=Extracellular lipase At3g26430; Flags: Precursor >gi|9294302|dbj|BAB02204.1| nodul		4	79	0.45	*	-	Unigene8067	comp26222_c0_seq1	-0.141245	0.976035
Unigene24472	149 829 hypothetical protein ARALYDRAFT_475014 [Arabidopsis lyrata subsp. lyrata] >gi|297332245|gb|EFH62663.1| hypothetical protein ARALYDRAFT_475014 [Arabidopsis lyrata subsp. lyrata]		8	124	0.464	*	-	Unigene24472	comp27683_c0_seq1	-1.27249	0.231955
CL10649.Contig1	46 1488 minus strand unnamed protein product [Thellungiella halophila]		7	181	0.643	*	-	CL10649.Contig1	comp35769_c0_seq1	1.24989	0.161619
CL11706.Contig1	73 786 minus strand NDPK III [Brassica rapa]		6	104	2.203	*	+	CL11706.Contig1	comp65163_c0_seq1	30.9733	0.205076
Unigene26265	1 315 minus strand tubulin beta-2 [Arabidopsis lyrata subsp. lyrata] >gi|297323357|gb|EFH53778.1| tubulin beta-2 [Arabidopsis lyrata subsp. lyrata]		5	615	0.646	*	-	Unigene26265	comp29840_c2_seq2	1.62639	0.057504
CL9193.Contig2	44 541 peroxidase [Arabidopsis thaliana] >gi|25453217|sp|Q9SJZ2.1|PER17_ARATH RecName: Full=Peroxidase 17; Short=Atperox P17; AltName: Full=ATP25a; Flags: Precursor >gi|330252207|gb|AEC07301.1| peroxidase [Arabidopsis thaliana]		7	146	0.651	*	-	CL9193.Contig2	comp27040_c0_seq2	-1.24037	0.266778
CL9570.Contig1	122 1216 unnamed protein product [Thellungiella halophila]		10	312	0.423	*	-	CL9570.Contig1	comp18271_c0_seq1	2.92092	0.00135711
CL783.Contig2	5 823 Peptidyl-prolyl cis-trans isomerase CYP20-3 [Arabidopsis thaliana] >gi|332646777|gb|AEE80298.1| Peptidyl-prolyl cis-trans isomerase CYP20-3 [Arabidopsis thaliana]		3	165	0.629	*	-	CL783.Contig2	comp118315_c0_seq1	0.376603	1
Unigene28395	102 1922 minus strand pyruvate decarboxylase-2 [Arabidopsis lyrata subsp. lyrata] >gi|297311904|gb|EFH42328.1| pyruvate decarboxylase-2 [Arabidopsis lyrata subsp. lyrata]		19	913	1.3	*	+	Unigene28395	comp26357_c0_seq1	-0.87935	0.351405
CL10949.Contig3	247 1926 unnamed protein product [Thellungiella halophila]	CL10949.Contig5	18	535	1.274	*	+	CL10949.Contig3	comp24959_c0_seq1	-1.45954	0.0946385
CL643.Contig1	2 1975 minus strand SIT4 phosphatase-associated family protein [Arabidopsis thaliana] >gi|22022590|gb|AAM83251.1| At1g07990/T6D22_5 [Arabidopsis thaliana] >gi|28416501|gb|AAO42781.1| At1g07990/T6D22_5 [Arabidopsis thaliana] >gi|332190103|gb|AEE2		3	167	0.793	*	-	CL643.Contig1	comp32027_c0_seq2	-0.816356	0.429821
CL14120.Contig1	18 1676 minus strand predicted protein [Arabidopsis lyrata subsp. lyrata] >gi|297329476|gb|EFH59895.1| predicted protein [Arabidopsis lyrata subsp. lyrata]		10	306	1.57	*	+	CL14120.Contig1	comp30061_c0_seq1	-0.871325	0.43003
CL2540.Contig2	130 1167 transducin family protein [Arabidopsis lyrata subsp. lyrata] >gi|297333657|gb|EFH64075.1| transducin family protein [Arabidopsis lyrata subsp. lyrata]		10	372	0.644	*	-	CL2540.Contig2	comp28495_c0_seq8	-1.14391	0.889098
CL2232.Contig2	67 1719 pectin methylesterase-like protein [Arabidopsis thaliana]		8	394	0.627	*	-	CL2232.Contig2	comp28818_c0_seq2	0.527631	0.671396
CL1942.Contig1	25 438 minus strand chloroplast chaperonin 10 [Brassica rapa]	CL1942.Contig2	6	351	0.756	*	-	CL1942.Contig1	comp21284_c0_seq2	0.552254	0.710065
CL5981.Contig1	260 757 dimethylmenaquinone methyltransferase family protein [Arabidopsis lyrata subsp. lyrata] >gi|297330178|gb|EFH60597.1| dimethylmenaquinone methyltransferase family protein [Arabidopsis lyrata subsp. lyrata]	CL5981.Contig2 CL5981.Contig3 CL5981.Contig4 CL5981.Contig5 Unigene24138	18	391	0.408	*	-	CL5981.Contig1	comp27365_c0_seq4	-0.80981	0.510622
CL4537.Contig4	96 1034 hypothetical protein ARALYDRAFT_913787 [Arabidopsis lyrata subsp. lyrata] >gi|297313335|gb|EFH43758.1| hypothetical protein ARALYDRAFT_913787 [Arabidopsis lyrata subsp. lyrata]	CL4537.Contig5	9	405	1.617	*	+	CL4537.Contig4	comp25916_c0_seq1	0.865409	0.544992
CL1802.Contig2	68 406 minus strand unnamed protein product [Thellungiella halophila]		8	145	0.399	*	-	CL1802.Contig2	comp21987_c0_seq2	1.38989	0.263296
CL3677.Contig1	80 826 minus strand aconitase C-terminal domain-containing protein [Arabidopsis lyrata subsp. lyrata] >gi|297325862|gb|EFH56282.1| aconitase C-terminal domain-containing protein [Arabidopsis lyrata subsp. lyrata]	CL3677.Contig2	22	659	0.805	*	-	CL3677.Contig1	comp30587_c0_seq1	-0.0764249	1
CL1227.Contig1	5 1180 minus strand subtilisin-like protease [Arabidopsis thaliana]		11	362	0.503	*	-	CL1227.Contig1	comp28865_c0_seq6	-3.80138	0.0299205
Unigene289	78 935 minus strand S9 Tyrosyl aminopeptidase [Raphanus sativus]		8	127	2.699	*	+	Unigene289	comp29221_c0_seq2	2.94929	0.0497403
Unigene23591	153 1271 nucleosome assembly protein I-like protein; similar to mouse nap I, PIR Accession Number JS0707, partial [Arabidopsis thaliana]		5	291	0.55	*	-	Unigene23591	comp82785_c0_seq1	-0.471394	1
CL5743.Contig1	164 598 hypothetical protein ARALYDRAFT_904119 [Arabidopsis lyrata subsp. lyrata] >gi|297326088|gb|EFH56508.1| hypothetical protein ARALYDRAFT_904119 [Arabidopsis lyrata subsp. lyrata]		2	92	1.503	*	+	CL5743.Contig1	comp32195_c0_seq11	-0.655819	0.643945
CL9266.Contig1	45 2201 minus strand hypothetical protein ARALYDRAFT_472406 [Arabidopsis lyrata subsp. lyrata] >gi|297336294|gb|EFH66711.1| hypothetical protein ARALYDRAFT_472406 [Arabidopsis lyrata subsp. lyrata]		11	346	0.677	*	-	CL9266.Contig1	comp12091_c1_seq1	1.79164	0.356935
CL5075.Contig1	110 1693 minus strand succinate-semialdehyde dehydrogenase [Arabidopsis thaliana] >gi|118575126|sp|Q9SAK4.2|SSDH_ARATH RecName: Full=Succinate-semialdehyde dehydrogenase, mitochondrial; Short=At-SSADH1; AltName: Full=Aldehyde dehydrogenase famil		12	277	0.811	*	-	CL5075.Contig1	comp36312_c0_seq1	0.0279385	1
Unigene21122	109 267 minus strand uncharacterized protein [Arabidopsis thaliana] >gi|106879137|gb|ABF82598.1| At3g01130 [Arabidopsis thaliana] >gi|332640092|gb|AEE73613.1| uncharacterized protein [Arabidopsis thaliana]		2	77	0.42	*	-	Unigene21122	comp34454_c0_seq1	-0.335739	0.834635
CL648.Contig10	200 2413 minus strand Phosphoglucan, water dikinase, chloroplastic OS=Arabidopsis thaliana GN=GWD3 PE=1 SV=1	CL648.Contig11 CL648.Contig4 CL648.Contig5 CL648.Contig7 CL648.Contig8	4	144	2.061	*	+	CL648.Contig10	comp31029_c0_seq11	-32.5778	0.0102723
CL5196.Contig1	154 1206 minus strand hypothetical protein ARALYDRAFT_918614 [Arabidopsis lyrata subsp. lyrata] >gi|297310189|gb|EFH40613.1| hypothetical protein ARALYDRAFT_918614 [Arabidopsis lyrata subsp. lyrata]		27	1293	0.495	*	-	CL5196.Contig1	comp61918_c0_seq1	0.0140329	1
CL11935.Contig1	94 987 minus strand regulatory particle non-ATPase 13 [Arabidopsis thaliana] >gi|79323128|ref|NP_001031424.1| regulatory particle non-ATPase 13 [Arabidopsis thaliana] >gi|79323137|ref|NP_001031425.1| regulatory particle non-ATPase 13 [Arabidopsi		8	211	0.692	*	-	CL11935.Contig1	comp15894_c0_seq1	0.319817	0.841461
CL11597.Contig2	140 1006 minus strand 26S proteasome regulatory subunit [Arabidopsis lyrata subsp. lyrata] >gi|297827613|ref|XP_002881689.1| 26S proteasome regulatory subunit [Arabidopsis lyrata subsp. lyrata] >gi|297307815|gb|EFH38628.1| 26S proteasome regulat		14	477	0.769	*	-	CL11597.Contig2	comp27983_c0_seq1	1.15966	0.218977
CL8098.Contig1	29 694 translational inhibitor protein like [Arabidopsis thaliana]		16	353	0.831	*	-	CL8098.Contig1	comp27680_c0_seq3	4.64962	0.00225537
Unigene23946	156 1241 minus strand peptidoglycan-binding LysM domain-containing protein [Arabidopsis lyrata subsp. lyrata] >gi|297329880|gb|EFH60299.1| peptidoglycan-binding LysM domain-containing protein [Arabidopsis lyrata subsp. lyrata]		18	415	0.601	*	-	Unigene23946	comp23065_c0_seq3	-1.15665	0.203773
Unigene21694	3 911 minus strand unnamed protein product [Thellungiella halophila]		20	608	0.331	*	-	Unigene21694	comp41546_c0_seq1	0.376603	0.809972
CL6746.Contig1	100 1374 minus strand hypothetical protein ARALYDRAFT_915009 [Arabidopsis lyrata subsp. lyrata] >gi|297313920|gb|EFH44343.1| hypothetical protein ARALYDRAFT_915009 [Arabidopsis lyrata subsp. lyrata]		10	259	1.375	*	+	CL6746.Contig1	comp27655_c0_seq1	1.31788	0.139691
Unigene623	130 852 unnamed protein product [Thellungiella halophila]		7	443	1.883	*	+	Unigene623	comp29160_c0_seq1	2.50116	0.0167412
CL12773.Contig3	44 658 minus strand Nascent polypeptide-associated complex subunit alpha-like protein 1 [Arabidopsis thaliana] >gi|71151984|sp|Q9LHG9.1|NACA1_ARATH RecName: Full=Nascent polypeptide-associated complex subunit alpha-like protein 1; Short=NAC-alph		10	994	0.68	*	-	CL12773.Contig3	comp24990_c0_seq1	2.65156	0.00976145
CL736.Contig5	116 1012 minus strand unnamed protein product [Thellungiella halophila]		6	210	2.809	*	+	CL736.Contig5	comp61136_c0_seq1	-0.449368	0.863482
CL494.Contig1	467 2230 protein IQ-DOMAIN 14 [Arabidopsis thaliana] >gi|238479554|ref|NP_001154574.1| protein IQ-DOMAIN 14 [Arabidopsis thaliana] >gi|75271948|sp|Q8LPG9.1|IQD14_ARATH RecName: Full=Protein IQ-DOMAIN 14 >gi|30725490|gb|AAP37767.1| At2g43680 [Arab	CL494.Contig3 CL494.Contig5 Unigene529	2	38	0.586	*	-	CL494.Contig1	comp19478_c0_seq4	-2.17676	0.0123692
Unigene8490	143 1972 minus strand hypothetical protein ARALYDRAFT_473472 [Arabidopsis lyrata subsp. lyrata] >gi|297339588|gb|EFH70005.1| hypothetical protein ARALYDRAFT_473472 [Arabidopsis lyrata subsp. lyrata]		42	1346	1.582	*	+	Unigene8490	comp22757_c0_seq5	0.318246	0.958382
CL7657.Contig1	112 858 117M18_18 [Brassica rapa]	CL7657.Contig2	8	276	2.855	*	+	CL7657.Contig1	comp31649_c1_seq2	0.476837	0.687097
Unigene27240	226 3948 minus strand unnamed protein product [Thellungiella halophila]		5	70	1.746	*	+	Unigene27240	comp32224_c0_seq3	-2.14358	0.0489753
CL11059.Contig1	25 1146 strictosidine synthase family protein [Arabidopsis thaliana] >gi|332646077|gb|AEE79598.1| strictosidine synthase family protein [Arabidopsis thaliana]		23	935	2.042	*	+	CL11059.Contig1	comp11225_c0_seq1	2.20668	0.131043
CL9655.Contig3	1 321 minus strand cyclase family protein [Arabidopsis lyrata subsp. lyrata] >gi|297312967|gb|EFH43390.1| cyclase family protein [Arabidopsis lyrata subsp. lyrata]		8	163	0.591	*	-	CL9655.Contig3	comp15079_c0_seq1	-2.65384	0.00164336
CL5201.Contig2	1 759 minus strand catalytic/ coenzyme binding protein [Arabidopsis lyrata subsp. lyrata] >gi|297319309|gb|EFH49731.1| catalytic/ coenzyme binding protein [Arabidopsis lyrata subsp. lyrata]	CL5201.Contig3 CL5201.Contig4	6	208	0.561	*	-	CL5201.Contig2	comp30435_c0_seq3	3.0698	0.194336
CL4428.Contig2	64 1743 minus strand Ara4-interacting protein [Arabidopsis thaliana] >gi|332657643|gb|AEE83043.1| Ara4-interacting protein [Arabidopsis thaliana]	CL4428.Contig3	15	507	0.66	*	-	CL4428.Contig2	comp22393_c0_seq1	-1.10375	0.220285
CL7875.Contig1	134 2662 minus strand unnamed protein product [Thellungiella halophila]	CL7875.Contig2	92	2686	1.491	*	+	CL7875.Contig1	comp32241_c1_seq2	-0.539972	0.638836
CL1405.Contig1	63 1871 minus strand hypothetical protein ARALYDRAFT_491252 [Arabidopsis lyrata subsp. lyrata] >gi|297312965|gb|EFH43388.1| hypothetical protein ARALYDRAFT_491252 [Arabidopsis lyrata subsp. lyrata]		23	976	1.427	*	+	CL1405.Contig1	comp34442_c0_seq1	-33.3179	0.00108402
CL7567.Contig2	157 1671 minus strand dihydrolipoyl dehydrogenase 2 [Arabidopsis thaliana] >gi|30684428|ref|NP_566570.3| dihydrolipoyl dehydrogenase 2 [Arabidopsis thaliana] >gi|75264758|sp|Q9M5K2.1|DLDH2_ARATH RecName: Full=Dihydrolipoyl dehydrogenase 2, mitoc		11	982	1.526	*	+	CL7567.Contig2	comp31223_c0_seq2	-2.53805	0.00244945
Unigene20328	59 1711 rotamase FKBP 1 [Arabidopsis thaliana] >gi|73919362|sp|Q38931.2|FKB62_ARATH RecName: Full=Peptidyl-prolyl cis-trans isomerase FKBP62; Short=PPIase FKBP62; AltName: Full=70 kDa peptidyl-prolyl isomerase; AltName: Full=FK506-binding protein		8	163	1.711	*	+	Unigene20328	comp31441_c2_seq2	-0.620084	0.582826
Unigene703	76 444 minus strand 60S ribosomal protein L35-1 [Arabidopsis thaliana] >gi|46397054|sp|Q9SF53.1|RL351_ARATH RecName: Full=60S ribosomal protein L35-1 >gi|332641253|gb|AEE74774.1| 60S ribosomal protein L35-1 [Arabidopsis thaliana]	CL7631.Contig2 CL7631.Contig3	3	96	1.449	*	+	Unigene703	comp27862_c0_seq1	0.848593	0.387544
CL1202.Contig6	303 839 minus strand 4-methyl-5(b-hydroxyethyl)-thiazole monophosphate biosynthesis [Arabidopsis thaliana] >gi|7769869|gb|AAF69547.1|AC008007_22 F12M16.18 [Arabidopsis thaliana] >gi|332194795|gb|AEE32916.1| 4-methyl-5(b-hydroxyethyl)-thiazole mo	CL1202.Contig7	2	108	1.697	*	+	CL1202.Contig6	comp29714_c0_seq10	-32.0939	0.0347447
CL4361.Contig3	90 1391 minus strand 117M18_4 [Brassica rapa]		3	54	1.633	*	+	CL4361.Contig3	comp25051_c0_seq1	0.306214	0.878157
CL12262.Contig1	1 2928 minus strand hypothetical protein ARALYDRAFT_481921 [Arabidopsis lyrata subsp. lyrata] >gi|297326924|gb|EFH57344.1| hypothetical protein ARALYDRAFT_481921 [Arabidopsis lyrata subsp. lyrata]		10	474	1.308	*	+	CL12262.Contig1	comp32212_c0_seq3	-0.651311	0.549502
Unigene1015	122 664 minus strand ADP-ribosylation factor [Arabidopsis lyrata subsp. lyrata] >gi|297338427|gb|EFH68844.1| ADP-ribosylation factor [Arabidopsis lyrata subsp. lyrata]	Unigene1016 Unigene1021 Unigene1022 Unigene2214 Unigene2215 Unigene25424 Unigene25425 Unigene25426 Unigene25427 Unigene25428 Unigene25429	13	312	2.705	*	+	Unigene1015	comp18368_c0_seq1	0.206678	1
CL3177.Contig3	118 1053 minus strand aldose 1-epimerase family protein [Arabidopsis lyrata subsp. lyrata] >gi|297315481|gb|EFH45904.1| aldose 1-epimerase family protein [Arabidopsis lyrata subsp. lyrata]		15	429	0.485	*	-	CL3177.Contig3	comp30624_c0_seq7	31.7741	0.0686039
Unigene19384	4 1332 minus strand FLK [Arabidopsis thaliana] >gi|61661326|gb|AAX51269.1| FLK [Arabidopsis thaliana]		17	402	0.763	*	-	Unigene19384	comp28281_c0_seq1	-0.690485	0.543692
CL8801.Contig2	154 2292 glutamyl-tRNA synthetase [Arabidopsis thaliana] >gi|3435196|gb|AAC36469.1| glutamyl-tRNA synthetase [Arabidopsis thaliana] >gi|20466252|gb|AAM20443.1| glutamyl-tRNA synthetase [Arabidopsis thaliana] >gi|23198080|gb|AAN15567.1| glutamyl-t		12	306	1.734	*	+	CL8801.Contig2	comp31341_c0_seq1	-1.28288	0.139691
CL12333.Contig3	41 400 minus strand adenylosuccinate synthetase [Arabidopsis thaliana] >gi|2500026|sp|Q96529.1|PURA_ARATH RecName: Full=Adenylosuccinate synthetase, chloroplastic; Short=AMPSase; Short=AdSS; AltName: Full=IMP--aspartate ligase; Flags: Precursor		3	177	0.437	*	-	CL12333.Contig3	comp29929_c0_seq1	0.446864	0.726169
CL12197.Contig1	80 688 minus strand essential protein Yae1, N-terminal-domain-containing protein [Arabidopsis thaliana] >gi|332193605|gb|AEE31726.1| essential protein Yae1, N-terminal-domain-containing protein [Arabidopsis thaliana]		2	68	0.551	*	-	CL12197.Contig1	comp20731_c0_seq1	0.113569	1
CL830.Contig13	259 771 unnamed protein product [Thellungiella halophila]	CL830.Contig14 CL830.Contig8 CL830.Contig9	9	1110	2.813	*	+	CL830.Contig13	comp12201_c0_seq1	-0.677845	0.714256
CL10582.Contig2	45 530 unnamed protein product [Thellungiella halophila]	CL10582.Contig3	6	223	3.621	*	+	CL10582.Contig2	comp94898_c0_seq1	-31.8597	0.0686039
CL77.Contig1	25 849 endochitinase [Brassica rapa subsp. chinensis]		37	1597	0.561	*	-	CL77.Contig1	comp21931_c0_seq1	1.09209	0.606426
Unigene29716	113 406 putative protein [Arabidopsis thaliana] >gi|7270312|emb|CAB80081.1| putative protein [Arabidopsis thaliana]		4	102	1.898	*	+	Unigene29716	comp33066_c0_seq1	0.910477	0.356889
CL8292.Contig1	131 1306 minus strand Chain A, Structure Of Arabidopsis Atserpin1. Native Stressed Conforma		27	630	0.625	*	-	CL8292.Contig1	comp29132_c0_seq1	-0.371525	0.77873
CL1202.Contig10	606 965 minus strand hypothetical protein ARALYDRAFT_478924 [Arabidopsis lyrata subsp. lyrata] >gi|297328746|gb|EFH59165.1| hypothetical protein ARALYDRAFT_478924 [Arabidopsis lyrata subsp. lyrata]	CL1202.Contig11 CL1202.Contig3 CL1202.Contig4 CL1202.Contig8 CL1202.Contig9	2	77	2.471	*	+	CL1202.Contig10	comp14128_c0_seq1	-2.62033	0.00150403
Unigene16435	33 587 minus strand Disease resistance-responsive (dirigent-like protein) family protein [Arabidopsis thaliana] >gi|28372910|gb|AAO39937.1| At1g58170 [Arabidopsis thaliana] >gi|332195384|gb|AEE33505.1| Disease resistance-responsive (dirigent-lik		10	209	0.413	*	-	Unigene16435	comp21225_c0_seq1	-1.3396	0.196117
CL10451.Contig5	53 268 minus strand peroxidase [Brassica napus]		8	314	0.61	*	-	CL10451.Contig5	comp23002_c0_seq2	1.47582	0.0986919
CL13301.Contig1	135 470 FK506-binding protein 12 kD [Arabidopsis lyrata subsp. lyrata] >gi|297312446|gb|EFH42870.1| FK506-binding protein 12 kD [Arabidopsis lyrata subsp. lyrata]		19	947	0.778	*	-	CL13301.Contig1	comp28141_c3_seq1	0.713356	0.479674
CL1602.Contig2	2 787 unnamed protein product [Thellungiella halophila]		2	213	1.307	*	+	CL1602.Contig2	comp24909_c0_seq1	2.29414	0.105499
CL10581.Contig2	12 1235 minus strand La domain-containing protein [Arabidopsis lyrata subsp. lyrata] >gi|297314888|gb|EFH45311.1| La domain-containing protein [Arabidopsis lyrata subsp. lyrata]		3	230	0.563	*	-	CL10581.Contig2	comp29663_c0_seq2	1.53975	0.217131
CL2814.Contig1	128 979 RNA recognition motif-containing protein [Arabidopsis thaliana] >gi|21537200|gb|AAM61541.1| RNA recognition motif-containing protein SEB-4 [Arabidopsis thaliana] >gi|124300976|gb|ABN04740.1| At1g78260 [Arabidopsis thaliana] >gi|332197966|		2	74	0.524	*	-	CL2814.Contig1	comp16002_c0_seq1	-1.18262	0.565875
CL202.Contig2	45 1076 peroxidase 30, partial [Brassica rapa]		46	997	0.391	*	-	CL202.Contig2	comp32883_c0_seq1	1.60131	0.0621028
CL83.Contig2	174 614 minus strand ubiquitin-conjugating enzyme E2 variant 1D [Arabidopsis thaliana] >gi|332645439|gb|AEE78960.1| ubiquitin-conjugating enzyme E2 variant 1D [Arabidopsis thaliana]		18	728	0.772	*	-	CL83.Contig2	comp27538_c0_seq6	3.65558	0.257553
CL6528.Contig2	120 1613 minus strand alanine-2-oxoglutarate aminotransferase 1 [Arabidopsis lyrata subsp. lyrata] >gi|297339119|gb|EFH69536.1| alanine-2-oxoglutarate aminotransferase 1 [Arabidopsis lyrata subsp. lyrata]		2	48	0.635	*	-	CL6528.Contig2	comp31719_c0_seq1	-1.70775	0.0815987
CL11551.Contig1	42 1310 unnamed protein product [Thellungiella halophila]		6	140	1.475	*	+	CL11551.Contig1	comp26400_c0_seq2	1.6297	0.0720457
CL4191.Contig1	76 504 minus strand peptidyl-prolyl cis-trans isomerase PPIC-type family protein [Arabidopsis lyrata subsp. lyrata] >gi|297339241|gb|EFH69658.1| peptidyl-prolyl cis-trans isomerase PPIC-type family protein [Arabidopsis lyrata subsp. lyrata]	CL4191.Contig2	6	232	0.539	*	-	CL4191.Contig1	comp24946_c1_seq2	-0.535661	0.643979
Unigene28617	151 1134 minus strand hypothetical protein ARALYDRAFT_910048 [Arabidopsis lyrata subsp. lyrata] >gi|297317758|gb|EFH48180.1| hypothetical protein ARALYDRAFT_910048 [Arabidopsis lyrata subsp. lyrata]		30	730	0.666	*	-	Unigene28617	comp26842_c0_seq1	-0.0767156	1
CL3695.Contig2	2 1252 minus strand glutamate decarboxylase 2 [Brassica juncea]		17	576	1.7	*	+	CL3695.Contig2	comp29471_c0_seq1	1.53926	0.0693861
CL3350.Contig1	3 149 minus strand unnamed protein product [Thellungiella halophila]	CL3350.Contig2	4	76	0.426	*	-	CL3350.Contig1	comp19334_c0_seq3	32.1598	0.0251893
Unigene24075	146 463 hypothetical protein ARALYDRAFT_915104 [Arabidopsis lyrata subsp. lyrata] >gi|297315993|gb|EFH46416.1| hypothetical protein ARALYDRAFT_915104 [Arabidopsis lyrata subsp. lyrata]		3	220	0.514	*	-	Unigene24075	comp27019_c0_seq1	0.319391	0.852408
CL13638.Contig1	111 1193 etfalpha [Arabidopsis lyrata subsp. lyrata] >gi|297340126|gb|EFH70543.1| etfalpha [Arabidopsis lyrata subsp. lyrata]	CL13638.Contig2	13	455	0.615	*	-	CL13638.Contig1	comp20038_c0_seq1	-1.4852	0.0969431
CL6279.Contig2	55 621 hypothetical protein ARALYDRAFT_489363 [Arabidopsis lyrata subsp. lyrata] >gi|297320076|gb|EFH50498.1| hypothetical protein ARALYDRAFT_489363 [Arabidopsis lyrata subsp. lyrata]		6	118	1.928	*	+	CL6279.Contig2	comp24257_c1_seq2	3.70684	0.00170418
CL6149.Contig1	214 1239 glycylpeptide N-tetradecanoyltransferase 1 [Arabidopsis thaliana] >gi|85541754|sp|Q9LTR9.2|NMT1_ARATH RecName: Full=Glycylpeptide N-tetradecanoyltransferase 1; AltName: Full=Myristoyl-CoA:protein N-myristoyltransferase 1; Short=NMT 1; Sh	CL6149.Contig2	2	124	2.021	*	+	CL6149.Contig1	comp24652_c0_seq2	0.246644	0.889098
CL2541.Contig2	3 1067 hypothetical protein ARALYDRAFT_491673 [Arabidopsis lyrata subsp. lyrata] >gi|297315197|gb|EFH45620.1| hypothetical protein ARALYDRAFT_491673 [Arabidopsis lyrata subsp. lyrata]		4	104	1.95	*	+	CL2541.Contig2	comp27964_c0_seq1	0.604333	0.640815
Unigene23018	270 1463 chloroplast malate dehydrogenase [Brassica rapa subsp. pekinensis]		11	950	0.735	*	-	Unigene23018	comp93467_c0_seq1	1.96157	0.356935
Unigene27442	209 1714 hypothetical protein ARALYDRAFT_484077 [Arabidopsis lyrata subsp. lyrata] >gi|297322605|gb|EFH53026.1| hypothetical protein ARALYDRAFT_484077 [Arabidopsis lyrata subsp. lyrata]		2	109	0.76	*	-	Unigene27442	comp31814_c0_seq2	2.52499	0.00628507
CL4932.Contig1	2 892 hypothetical protein ARALYDRAFT_483863 [Arabidopsis lyrata subsp. lyrata] >gi|297326113|gb|EFH56533.1| hypothetical protein ARALYDRAFT_483863 [Arabidopsis lyrata subsp. lyrata]		13	311	0.638	*	-	CL4932.Contig1	comp27823_c0_seq4	32.5447	0.0102723
Unigene26419	1 396 60S ribosomal protein L6 [Arabidopsis lyrata subsp. lyrata] >gi|297338845|gb|EFH69262.1| 60S ribosomal protein L6 [Arabidopsis lyrata subsp. lyrata]		5	175	2.923	*	+	Unigene26419	comp29891_c1_seq2	1.15174	0.214078
Unigene15213	81 227 minus strand HSP20-like chaperone [Arabidopsis thaliana] >gi|332656774|gb|AEE82174.1| HSP20-like chaperone [Arabidopsis thaliana]		9	375	1.236	*	+	Unigene15213	comp27778_c0_seq7	-32.2967	0.0251893
CL8917.Contig1	145 3717 uncharacterized protein [Arabidopsis thaliana] >gi|330253560|gb|AEC08654.1| uncharacterized protein [Arabidopsis thaliana]		31	1036	1.551	*	+	CL8917.Contig1	comp32015_c0_seq6	-1.63166	0.116021
CL1804.Contig2	158 1285 minus strand ATPME2 [Arabidopsis lyrata subsp. lyrata] >gi|297337616|gb|EFH68033.1| ATPME2 [Arabidopsis lyrata subsp. lyrata]	CL1804.Contig3	2	193	0.413	*	-	CL1804.Contig2	comp21910_c0_seq1	2.45907	0.00777489
CL4700.Contig1	51 1838 hypothetical protein [Arabidopsis thaliana]		4	146	1.384	*	+	CL4700.Contig1	comp61753_c0_seq1	2.11357	0.0866896
Unigene22344	2 916 senescence-associated cysteine protease [Brassica oleracea]		17	585	0.785	*	-	Unigene22344	comp26987_c0_seq4	32.6773	0.00777489
Unigene21004	5 1141 unnamed protein product [Thellungiella halophila]		29	915	0.548	*	-	Unigene21004	comp22828_c0_seq1	1.18105	0.203775
CL10499.Contig1	31 1632 minus strand glucan endo-1,3-beta-glucosidase 4 [Arabidopsis thaliana] >gi|42572413|ref|NP_974302.1| glucan endo-1,3-beta-glucosidase 4 [Arabidopsis thaliana] >gi|42572415|ref|NP_974303.1| glucan endo-1,3-beta-glucosidase 4 [Arabidopsis	CL10499.Contig2	5	153	0.441	*	-	CL10499.Contig1	comp25062_c0_seq1	1.4064	0.13109
CL519.Contig1	52 1545 unnamed protein product [Thellungiella halophila]	CL519.Contig2	2	122	2.251	*	+	CL519.Contig1	comp27673_c0_seq1	-1.53396	0.175293
Unigene19595	155 715 adenine nucleotide alpha hydrolases-like protein [Arabidopsis thaliana] >gi|20198098|gb|AAD23643.2| expressed protein [Arabidopsis thaliana] >gi|21592708|gb|AAM64657.1| RD2 protein [Arabidopsis thaliana] >gi|330252109|gb|AEC07203.1| adeni		12	325	0.725	*	-	Unigene19595	comp32358_c0_seq1	-1.62914	0.0537734
CL4859.Contig1	60 908 minus strand putative lactoylglutathione lyase [Brassica rapa]		27	453	1.256	*	+	CL4859.Contig1	comp85809_c0_seq1	-0.945325	0.690501
Unigene28479	307 1134 unknown [Brassica rapa]		21	921	0.665	*	-	Unigene28479	comp20144_c0_seq1	-0.636626	0.558851
Unigene26566	2 2584 predicted protein [Arabidopsis lyrata subsp. lyrata] >gi|297309842|gb|EFH40266.1| predicted protein [Arabidopsis lyrata subsp. lyrata]		5	236	0.669	*	-	Unigene26566	comp31406_c0_seq20	-0.729698	0.551325
Unigene1099	3 338 hypothetical protein ARALYDRAFT_488439 [Arabidopsis lyrata subsp. lyrata] >gi|297317527|gb|EFH47949.1| hypothetical protein ARALYDRAFT_488439 [Arabidopsis lyrata subsp. lyrata]		4	144	0.456	*	-	Unigene1099	comp21663_c0_seq1	1.07175	0.544992
CL8114.Contig2	144 482 minus strand hypothetical protein ARALYDRAFT_311324 [Arabidopsis lyrata subsp. lyrata] >gi|297335226|gb|EFH65643.1| hypothetical protein ARALYDRAFT_311324 [Arabidopsis lyrata subsp. lyrata]	Unigene25145	4	141	1.85	*	+	CL8114.Contig2	comp45662_c0_seq1	-0.0277873	1
Unigene20036	144 641 hypothetical protein ARALYDRAFT_479859 [Arabidopsis lyrata subsp. lyrata] >gi|297331407|gb|EFH61826.1| hypothetical protein ARALYDRAFT_479859 [Arabidopsis lyrata subsp. lyrata]		7	411	0.47	*	-	Unigene20036	comp25619_c0_seq1	-1.68059	0.0489753
CL736.Contig2	1 1224 minus strand heat shock protein 81-4 [Brassica rapa]		3	451	2.261	*	+	CL736.Contig2	comp23308_c0_seq1	0.0956466	1
CL1707.Contig1	99 1418 minus strand hypothetical protein ARALYDRAFT_482234 [Arabidopsis lyrata subsp. lyrata] >gi|297327091|gb|EFH57511.1| hypothetical protein ARALYDRAFT_482234 [Arabidopsis lyrata subsp. lyrata]		11	249	1.339	*	+	CL1707.Contig1	comp25054_c0_seq1	0.319572	0.852216
Unigene27340	82 1791 acyl-activating enzyme 7 [Arabidopsis thaliana] >gi|75304477|sp|Q8VZF1.1|AEE7_ARATH RecName: Full=Acetate/butyrate--CoA ligase AAE7, peroxisomal; AltName: Full=AMP-binding protein 7; Short=AtAMPBP7; AltName: Full=Acetyl-CoA synthetase; Al		4	106	1.987	*	+	Unigene27340	comp26768_c1_seq10	3.35089	0.00126533
CL8614.Contig1	77 844 minus strand 60S ribosomal protein L7A [Arabidopsis lyrata subsp. lyrata] >gi|297326154|gb|EFH56574.1| 60S ribosomal protein L7A [Arabidopsis lyrata subsp. lyrata]	CL8614.Contig2 CL8614.Contig6	11	197	2.818	*	+	CL8614.Contig1	comp30100_c0_seq4	0.550632	0.65788
CL5706.Contig3	142 540 minus strand Transketolase, chloroplastic OS=Solanum tuberosum PE=2 SV=1	CL5706.Contig4	4	280	1.727	*	+	CL5706.Contig3	comp29263_c0_seq1	-1.60342	0.139691
Unigene19962	44 529 minus strand single-strand DNA-binding protein [Arabidopsis thaliana] >gi|332642598|gb|AEE76119.1| single-strand DNA-binding protein [Arabidopsis thaliana]		4	124	0.465	*	-	Unigene19962	comp21148_c0_seq2	0.216328	1
CL2018.Contig3	53 1213 hypothetical protein ARALYDRAFT_492356 [Arabidopsis lyrata subsp. lyrata] >gi|297313478|gb|EFH43901.1| hypothetical protein ARALYDRAFT_492356 [Arabidopsis lyrata subsp. lyrata]	CL2018.Contig4	5	158	2	*	+	CL2018.Contig3	comp29741_c0_seq4	0.301494	0.872417
CL10366.Contig1	2 1633 long chain acyl-CoA synthetase [Brassica napus]		5	129	1.755	*	+	CL10366.Contig1	comp29933_c0_seq1	1.01276	0.259604
CL3219.Contig2	139 966 minus strand hypothetical protein ARALYDRAFT_477400 [Arabidopsis lyrata subsp. lyrata] >gi|297330126|gb|EFH60545.1| hypothetical protein ARALYDRAFT_477400 [Arabidopsis lyrata subsp. lyrata]		35	1102	0.412	*	-	CL3219.Contig2	comp21467_c0_seq1	343000	1
CL2657.Contig1	549 1022 minus strand lipid-associated family protein [Arabidopsis lyrata subsp. lyrata] >gi|297326271|gb|EFH56691.1| lipid-associated family protein [Arabidopsis lyrata subsp. lyrata]		19	502	0.475	*	-	CL2657.Contig1	comp33343_c0_seq1	1.22188	0.197745
Unigene22436	2 343 beta-fructofuranosidase 5 [Arabidopsis lyrata subsp. lyrata] >gi|297337654|gb|EFH68071.1| beta-fructofuranosidase 5 [Arabidopsis lyrata subsp. lyrata]		2	79	0.726	*	-	Unigene22436	comp25428_c1_seq1	1.599	0.461399
CL5126.Contig2	362 1087 minus strand 60S ribosomal protein L7 [Arabidopsis lyrata subsp. lyrata] >gi|297322576|gb|EFH52997.1| 60S ribosomal protein L7 [Arabidopsis lyrata subsp. lyrata]	CL5126.Contig3	11	292	2.232	*	+	CL5126.Contig2	comp28422_c1_seq1	0.79164	0.889098
Unigene7503	158 634 peptidyl-prolyl cis-trans isomerase cyclophilin-type family protein [Arabidopsis lyrata subsp. lyrata] >gi|297337878|gb|EFH68295.1| peptidyl-prolyl cis-trans isomerase cyclophilin-type family protein [Arabidopsis lyrata subsp. lyrata]		7	165	0.563	*	-	Unigene7503	comp34664_c0_seq1	0.344181	0.832141
CL1512.Contig1	156 2519 neutral ceramidase [Arabidopsis thaliana] >gi|110810580|sp|Q304B9.1|NCASE_ARATH RecName: Full=Neutral ceramidase; Short=N-CDase; Short=NCDase; AltName: Full=Acylsphingosine deacylase; AltName: Full=N-acylsphingosine amidohydrolase; Flags	CL1512.Contig2	13	270	0.712	*	-	CL1512.Contig1	comp30907_c0_seq1	-0.396555	0.756781
CL4584.Contig1	65 979 minus strand putative Myo28B1 [Brassica napus]		3	88	0.628	*	-	CL4584.Contig1	comp14563_c0_seq1	0.0811471	1
Unigene20536	122 1024 minus strand proteasome inhibitor subunit 1 (PI31) [Arabidopsis thaliana] >gi|18203248|sp|Q9M330.1|PSMF1_ARATH RecName: Full=Probable proteasome inhibitor >gi|332645645|gb|AEE79166.1| proteasome inhibitor subunit 1 (PI31) [Arabidopsis t		6	162	1.719	*	+	Unigene20536	comp28537_c0_seq1	-0.73773	0.487936
CL8188.Contig1	3 1907 minus strand acylaminoacyl-peptidase [Arabidopsis thaliana] >gi|60729672|pir||JC8016 acylaminoacyl-peptidase (EC 3.4.19.1) - Arabidopsis thaliana >gi|30466066|dbj|BAC76411.1| acylamino acid-releasing enzyme [Arabidopsis thaliana] >gi|3326		6	81	1.758	*	+	CL8188.Contig1	comp30848_c0_seq2	0.58364	0.644374
Unigene13233	81 311 minus strand homolog of anti-oxidant 1 [Arabidopsis thaliana] >gi|14532548|gb|AAK64002.1| At1g66240/T6J19_6 [Arabidopsis thaliana] >gi|18655401|gb|AAL76156.1| At1g66240/T6J19_6 [Arabidopsis thaliana] >gi|332196360|gb|AEE34481.1| homolog o		19	591	0.609	*	-	Unigene13233	comp97340_c0_seq1	31.2363	0.139691
CL12773.Contig1	66 674 minus strand Nascent polypeptide-associated complex subunit alpha-like protein 1 [Arabidopsis thaliana] >gi|71151984|sp|Q9LHG9.1|NACA1_ARATH RecName: Full=Nascent polypeptide-associated complex subunit alpha-like protein 1; Short=NAC-alph		17	1072	0.647	*	-	CL12773.Contig1	comp58581_c0_seq1	0.376603	0.935805
CL2621.Contig2	108 1442 minus strand IAA-amino acid hydrolase 3 [Brassica rapa]		14	472	0.718	*	-	CL2621.Contig2	comp27651_c0_seq1	-0.209944	0.934475
CL789.Contig1	17 1303 lipoxygenase 2 [Brassica napus]	CL789.Contig2 CL789.Contig3 CL789.Contig4	3	135	5.933	*	+	CL789.Contig1	comp20682_c0_seq1	-1.20836	0.889098
Unigene22909	156 1124 aminopeptidase M1 [Arabidopsis thaliana] >gi|17473511|gb|AAL38379.1| AT4g33090/F4I10_20 [Arabidopsis thaliana] >gi|24209879|gb|AAN41401.1| aminopeptidase M [Arabidopsis thaliana] >gi|29028734|gb|AAO64746.1| At4g33090/F4I10_20 [Arabidopsi		9	464	1.537	*	+	Unigene22909	comp20823_c0_seq1	-1.01879	0.261344
CL3056.Contig1	143 1714 minus strand hypothetical protein ARALYDRAFT_354499 [Arabidopsis lyrata subsp. lyrata] >gi|297315648|gb|EFH46071.1| hypothetical protein ARALYDRAFT_354499 [Arabidopsis lyrata subsp. lyrata]		5	109	2.345	*	+	CL3056.Contig1	comp105536_c0_seq1	0.206678	1
CL9534.Contig1	160 1593 minus strand DIN3/LTA1 [Arabidopsis lyrata subsp. lyrata] >gi|297330452|gb|EFH60871.1| DIN3/LTA1 [Arabidopsis lyrata subsp. lyrata]		7	333	0.824	*	-	CL9534.Contig1	comp29226_c0_seq1	-0.137393	0.964617
Unigene1763	236 2056 minus strand hypothetical protein ARALYDRAFT_472806 [Arabidopsis lyrata subsp. lyrata] >gi|297336520|gb|EFH66937.1| hypothetical protein ARALYDRAFT_472806 [Arabidopsis lyrata subsp. lyrata]		21	627	0.753	*	-	Unigene1763	comp22924_c0_seq1	0.376603	0.935805
CL1120.Contig1	177 755 Os01g0254000 [Arabidopsis lyrata subsp. lyrata] >gi|297335251|gb|EFH65668.1| Os01g0254000 [Arabidopsis lyrata subsp. lyrata]	CL1120.Contig3	4	100	1.646	*	+	CL1120.Contig1	comp26273_c0_seq2	31.749	0.0686039
CL9746.Contig2	74 835 minus strand predicted protein [Arabidopsis lyrata subsp. lyrata] >gi|297322140|gb|EFH52561.1| predicted protein [Arabidopsis lyrata subsp. lyrata]		29	1113	0.728	*	-	CL9746.Contig2	comp6180_c0_seq1	0.598995	0.821569
CL14029.Contig1	105 935 minus strand unnamed protein product [Thellungiella halophila]		8	132	0.762	*	-	CL14029.Contig1	comp27816_c0_seq1	-0.53981	0.642294
CL1329.Contig4	112 1089 guanine nucleotide-binding family protein [Arabidopsis lyrata subsp. lyrata] >gi|297331080|gb|EFH61499.1| guanine nucleotide-binding family protein [Arabidopsis lyrata subsp. lyrata]		10	316	1.399	*	+	CL1329.Contig4	comp31227_c0_seq1	-0.0762722	1
Unigene25778	169 1227 splicing factor 1 [Arabidopsis thaliana] >gi|30696034|ref|NP_851169.1| splicing factor 1 [Arabidopsis thaliana] >gi|79330558|ref|NP_001032055.1| splicing factor 1 [Arabidopsis thaliana] >gi|222423074|dbj|BAH19518.1| AT5G51300 [Arabidopsi		6	203	0.675	*	-	Unigene25778	comp30582_c0_seq8	-0.265229	0.930707
CL6617.Contig1	7 1272 glycosyl transferase, family 35 protein [Arabidopsis thaliana] >gi|11994512|dbj|BAB02576.1| glycogen phosphorylase B; starch phosphorylase [Arabidopsis thaliana] >gi|15146189|gb|AAK83578.1| AT3g29320/MUO10_2 [Arabidopsis thaliana] >gi|2776		14	372	1.798	*	+	CL6617.Contig1	comp31472_c0_seq5	0.167865	0.98502
CL6065.Contig3	166 1686 minus strand unnamed protein product [Thellungiella halophila]		6	826	0.612	*	-	CL6065.Contig3	comp30842_c1_seq2	0.0183923	1
Unigene29734	125 451 hypothetical protein ARALYDRAFT_910661 [Arabidopsis lyrata subsp. lyrata] >gi|297320122|gb|EFH50544.1| hypothetical protein ARALYDRAFT_910661 [Arabidopsis lyrata subsp. lyrata]		7	276	0.548	*	-	Unigene29734	comp15181_c1_seq1	0.48269	0.69957
CL931.Contig1	2 2689 minus strand aconitate hydratase 1 [Arabidopsis thaliana] >gi|13124706|sp|Q42560.2|ACO1_ARATH RecName: Full=Aconitate hydratase 1; Short=Aconitase 1; AltName: Full=Citrate hydro-lyase 1 >gi|3805849|emb|CAA21469.1| cytoplasmatic aconitate		25	1206	1.456	*	+	CL931.Contig1	comp29703_c0_seq4	0.396164	0.772124
Unigene12630	1 1029 minus strand kas III [Arabidopsis lyrata subsp. lyrata] >gi|297333853|gb|EFH64271.1| kas III [Arabidopsis lyrata subsp. lyrata]		6	247	1.315	*	+	Unigene12630	comp9375_c0_seq1	0.929144	0.372224
CL2803.Contig4	43 1035 minus strand polygalacturonase inhibitor protein 5, partial [Brassica napus]	CL2803.Contig5	5	169	0.491	*	-	CL2803.Contig4	comp18684_c0_seq3	-31.8597	0.0686039
CL7173.Contig1	70 1146 minus strand senescence-associated cysteine protease [Brassica oleracea]	CL7173.Contig2	26	1121	1.247	*	+	CL7173.Contig1	comp22898_c0_seq2	0.766998	0.509077
CL4330.Contig1	146 892 minus strand 40S ribosomal protein S3-2 [Arabidopsis thaliana] >gi|75183568|sp|Q9M339.1|RS32_ARATH RecName: Full=40S ribosomal protein S3-2 >gi|16226458|gb|AAL16173.1|AF428405_1 AT3g53870/F5K20_170 [Arabidopsis thaliana] >gi|7630007|emb|	CL4330.Contig2 CL4330.Contig3 CL4330.Contig5	14	295	1.839	*	+	CL4330.Contig1	comp31366_c0_seq2	1.56281	0.0686039
Unigene23791	323 1537 Tubby-like F-box protein 3 [Arabidopsis thaliana] >gi|227204449|dbj|BAH57076.1| AT2G47900 [Arabidopsis thaliana] >gi|330255815|gb|AEC10909.1| Tubby-like F-box protein 3 [Arabidopsis thaliana]		4	38	0.641	*	-	Unigene23791	comp31380_c0_seq6	32.2743	0.0184434
CL13064.Contig1	106 966 minus strand uncharacterized protein [Arabidopsis thaliana] >gi|332643128|gb|AEE76649.1| uncharacterized protein [Arabidopsis thaliana]		5	107	0.684	*	-	CL13064.Contig1	comp30898_c0_seq5	0.853609	0.609414
CL9725.Contig1	137 373 small nuclear ribonucleoprotein G [Arabidopsis thaliana] >gi|332641534|gb|AEE75055.1| small nuclear ribonucleoprotein G [Arabidopsis thaliana]	Unigene28079	3	159	0.805	*	-	CL9725.Contig1	comp25086_c0_seq1	-33.2031	0.00135711
CL12128.Contig1	1153 2304 multiubiquitin chain binding protein MBP1 [Arabidopsis lyrata subsp. lyrata] >gi|297314686|gb|EFH45109.1| multiubiquitin chain binding protein MBP1 [Arabidopsis lyrata subsp. lyrata]	CL12128.Contig2	9	278	0.702	*	-	CL12128.Contig1	comp101954_c0_seq1	-0.20836	1
CL5177.Contig3	3 605 hypothetical protein ARALYDRAFT_476882 [Arabidopsis lyrata subsp. lyrata] >gi|297334969|gb|EFH65387.1| hypothetical protein ARALYDRAFT_476882 [Arabidopsis lyrata subsp. lyrata]		3	155	2.413	*	+	CL5177.Contig3	comp29117_c0_seq2	-0.929095	0.321743
CL1368.Contig2	110 808 unnamed protein product [Thellungiella halophila]		8	267	2.906	*	+	CL1368.Contig2	comp32413_c0_seq1	0.298334	0.840428
Unigene15003	33 611 uncharacterized protein [Arabidopsis thaliana] >gi|147742899|sp|Q8LDV3.2|Y4320_ARATH RecName: Full=Uncharacterized protein At4g13200, chloroplastic; Flags: Precursor >gi|332657844|gb|AEE83244.1| uncharacterized protein [Arabidopsis thalian		4	135	0.642	*	-	Unigene15003	comp17061_c0_seq1	0.550632	0.746244
CL6668.Contig2	87 914 minus strand porin-like protein [Brassica napus]		10	488	0.595	*	-	CL6668.Contig2	comp23105_c0_seq1	-0.282161	0.855499
CL11999.Contig2	58 1362 minus strand monodehydroascorbate reductase (NADH)-like protein [Arabidopsis thaliana]		27	870	1.456	*	+	CL11999.Contig2	comp23036_c0_seq1	-0.988274	0.27763
CL10451.Contig3	2 748 minus strand peroxidase precursor [Raphanus sativus var. niger]		12	576	0.771	*	-	CL10451.Contig3	comp14718_c1_seq1	-4.9088	0.00189581
Unigene2767	10 1068 uncharacterized protein [Arabidopsis thaliana] >gi|330253560|gb|AEC08654.1| uncharacterized protein [Arabidopsis thaliana]		12	304	1.358	*	+	Unigene2767	comp31826_c0_seq1	31.4505	0.0974087
Unigene21237	65 1918 hypothetical protein ARALYDRAFT_480310 [Arabidopsis lyrata subsp. lyrata] >gi|297329641|gb|EFH60060.1| hypothetical protein ARALYDRAFT_480310 [Arabidopsis lyrata subsp. lyrata]		13	323	1.41	*	+	Unigene21237	comp23994_c0_seq1	-0.196558	0.918693
CL12123.Contig1	399 590 minus strand translation machinery associated protein TMA7 [Arabidopsis thaliana] >gi|5103825|gb|AAD39655.1|AC007591_20 ESTs gb|AA650895, gb|AA720043 and gb|R29777 come from this gene [Arabidopsis thaliana] >gi|332191176|gb|AEE29297.1| t	CL12123.Contig2 CL12123.Contig3 Unigene19200	4	120	1.979	*	+	CL12123.Contig1	comp23314_c0_seq2	0.3166	0.831839
CL434.Contig1	193 1065 unknown [Arabidopsis thaliana]		7	112	2.191	*	+	CL434.Contig1	comp27487_c0_seq4	-0.805467	0.467855
CL1957.Contig1	304 5433 minus strand Clathrin, heavy chain [Arabidopsis thaliana] >gi|122223702|sp|Q0WNJ6.1|CLAH1_ARATH RecName: Full=Clathrin heavy chain 1 >gi|332641484|gb|AEE75005.1| Clathrin, heavy chain [Arabidopsis thaliana]	CL1957.Contig2	45	1167	1.394	*	+	CL1957.Contig1	comp23930_c1_seq1	0.249712	0.893951
Unigene8902	2 106 hypothetical protein ARALYDRAFT_913675 [Arabidopsis lyrata subsp. lyrata] >gi|297315338|gb|EFH45761.1| hypothetical protein ARALYDRAFT_913675 [Arabidopsis lyrata subsp. lyrata]		4	70	0.591	*	-	Unigene8902	comp11170_c0_seq1	0.79164	0.780368
CL2279.Contig3	79 1245 minus strand unnamed protein product [Thellungiella halophila]	CL2279.Contig4 CL2279.Contig5 CL2279.Contig6	31	658	3.372	*	+	CL2279.Contig3	comp31845_c0_seq3	1.29334	0.141742
CL9050.Contig1	3 818 putative nodulin [Arabidopsis thaliana]		6	128	0.655	*	-	CL9050.Contig1	comp25272_c0_seq1	1.45461	0.205076
CL3666.Contig1	145 2760 hypoxia up-regulated 1 [Arabidopsis thaliana] >gi|378548353|sp|F4JMJ1.1|HSP7R_ARATH RecName: Full=Heat shock 70 kDa protein 17; AltName: Full=Heat shock protein 70-17; Short=AtHsp70-17; Flags: Precursor >gi|332658381|gb|AEE83781.1| hypox		14	380	2.094	*	+	CL3666.Contig1	comp30236_c0_seq2	-0.415636	0.745894
CL5413.Contig1	375 722 minus strand phosphoenolpyruvate carboxylase [Brassica juncea]	CL5413.Contig2	6	217	1.696	*	+	CL5413.Contig1	comp24090_c0_seq1	0.998091	0.444977
CL12169.Contig1	10 1446 lipoxygenase 2 [Brassica napus]		4	148	3.22	*	+	CL12169.Contig1	comp31744_c0_seq1	2.29803	0.00816597
Unigene19013	174 611 Regulator of ribonuclease-like protein 3 [Arabidopsis thaliana] >gi|17368897|sp|Q9FH13.1|RRAA3_ARATH RecName: Full=Regulator of ribonuclease-like protein 3 >gi|9758753|dbj|BAB09117.1| S-adenosylmethionine:2-demethylmenaquinone methyltrans		4	134	0.476	*	-	Unigene19013	comp18681_c0_seq1	-31.8669	0.0489753
CL3215.Contig1	92 796 unnamed protein product [Thellungiella halophila]		3	76	0.726	*	-	CL3215.Contig1	comp26184_c0_seq3	0.24691	0.947992
CL7251.Contig1	96 656 temperature-induced lipocalin [Brassica napus]		9	91	0.71	*	-	CL7251.Contig1	comp22891_c0_seq1	-1.20836	0.239104
CL3437.Contig4	75 1814 hypothetical protein ARALYDRAFT_478791 [Arabidopsis lyrata subsp. lyrata] >gi|297330834|gb|EFH61253.1| hypothetical protein ARALYDRAFT_478791 [Arabidopsis lyrata subsp. lyrata]		3	166	1.512	*	+	CL3437.Contig4	comp33774_c0_seq1	-0.0602609	1
Unigene24922	51 1115 translocation protein SEC62 [Arabidopsis thaliana] >gi|332642919|gb|AEE76440.1| translocation protein SEC62 [Arabidopsis thaliana]		2	76	1.961	*	+	Unigene24922	comp28080_c0_seq1	0.194915	0.930707
CL12333.Contig2	93 452 minus strand adenylosuccinate synthetase [Arabidopsis thaliana] >gi|2500026|sp|Q96529.1|PURA_ARATH RecName: Full=Adenylosuccinate synthetase, chloroplastic; Short=AMPSase; Short=AdSS; AltName: Full=IMP--aspartate ligase; Flags: Precursor		4	248	0.596	*	-	CL12333.Contig2	comp25625_c0_seq2	-0.0563565	1
CL10513.Contig1	4 1332 hypothetical protein ARALYDRAFT_488521 [Arabidopsis lyrata subsp. lyrata] >gi|297317564|gb|EFH47986.1| hypothetical protein ARALYDRAFT_488521 [Arabidopsis lyrata subsp. lyrata]	CL10513.Contig2 CL10513.Contig3	21	626	0.793	*	-	CL10513.Contig1	comp30422_c0_seq2	-1.22731	0.606426
CL1180.Contig12	99 2012 minus strand NADP-malic enzyme 2 [Arabidopsis lyrata subsp. lyrata] >gi|297317323|gb|EFH47745.1| NADP-malic enzyme 2 [Arabidopsis lyrata subsp. lyrata]	CL1180.Contig16 CL1180.Contig17 CL1180.Contig22 CL1180.Contig11 CL1180.Contig15	6	1407	0.71	*	-	CL1180.Contig12	comp17336_c0_seq1	2.96157	0.0464872
CL5893.Contig1	131 1621 minus strand glutathione reductase [Brassica oleracea]		12	445	1.265	*	+	CL5893.Contig1	comp23801_c1_seq3	-0.309737	0.938384
CL10658.Contig1	94 963 GTP binding protein [Arabidopsis lyrata subsp. lyrata] >gi|297339476|gb|EFH69893.1| GTP binding protein [Arabidopsis lyrata subsp. lyrata]	CL10658.Contig2	9	164	1.716	*	+	CL10658.Contig1	comp23915_c0_seq1	0.79164	0.780368
CL4788.Contig1	211 2112 minus strand 10-formyltetrahydrofolate synthetase [Arabidopsis lyrata subsp. lyrata] >gi|297337420|gb|EFH67837.1| 10-formyltetrahydrofolate synthetase [Arabidopsis lyrata subsp. lyrata]		41	1005	1.211	*	+	CL4788.Contig1	comp30983_c0_seq1	-0.877055	0.353433
CL12269.Contig1	172 1602 minus strand glycoside hydrolase family 28 protein [Arabidopsis lyrata subsp. lyrata] >gi|297322456|gb|EFH52877.1| glycoside hydrolase family 28 protein [Arabidopsis lyrata subsp. lyrata]	CL12269.Contig2	7	192	0.502	*	-	CL12269.Contig1	comp28477_c0_seq1	2.62195	0.00174785
CL741.Contig1	308 1387 minus strand nuclear RNA binding protein, putative [Brassica oleracea]		4	386	1.539	*	+	CL741.Contig1	comp22225_c0_seq1	-0.623397	0.746244
CL14470.Contig1	109 1179 minus strand unnamed protein product [Thellungiella halophila]		6	169	0.542	*	-	CL14470.Contig1	comp20634_c0_seq3	0.097627	1
CL2318.Contig1	41 1801 minus strand unnamed protein product [Thellungiella halophila]		10	307	0.723	*	-	CL2318.Contig1	comp25716_c0_seq2	-0.865673	0.609414
Unigene8105	241 1863 minus strand synaptotagmin A [Arabidopsis thaliana] >gi|20197686|gb|AAM15203.1| expressed protein [Arabidopsis thaliana] >gi|20197724|gb|AAD29817.2| expressed protein [Arabidopsis thaliana] >gi|31071599|dbj|BAC76812.1| synaptotagmin A [		16	342	1.922	*	+	Unigene8105	comp89_c0_seq1	-31.6671	0.0974087
CL5159.Contig1	337 2553 minus strand monosaccharide-sensing protein 2 [Arabidopsis thaliana] >gi|334187185|ref|NP_001190923.1| monosaccharide-sensing protein 2 [Arabidopsis thaliana] >gi|20453189|gb|AAM19835.1| AT4g35300/F23E12_140 [Arabidopsis thaliana] >gi|3	CL5159.Contig2	5	185	1.784	*	+	CL5159.Contig1	comp25635_c0_seq4	-1.11448	0.418497
CL14023.Contig1	75 467 profilin 1 [Arabidopsis thaliana] >gi|2499810|sp|Q42449.1|PROF1_ARATH RecName: Full=Profilin-1; AltName: Allergen=Ara t 8 >gi|157829634|pdb|1A0K|A Chain A, Profilin I From Arabidopsis Thaliana >gi|9965575|gb|AAG10090.1|U43593_1 profilin [A		23	766	0.731	*	-	CL14023.Contig1	comp23045_c0_seq2	-0.826669	0.439405
CL369.Contig2	127 1197 cinnamyl alcohol dehydrogenase 5 [Arabidopsis thaliana] >gi|13626131|sp|O49482.1|CADH5_ARATH RecName: Full=Cinnamyl alcohol dehydrogenase 5; Short=AtCAD5; AltName: Full=Cinnamyl alcohol dehydrogenase D >gi|134104089|pdb|2CF5|A Chain A, C		6	80	1.894	*	+	CL369.Contig2	comp27417_c1_seq1	2.22404	0.0105084
CL574.Contig4	193 1170 hypothetical protein ARALYDRAFT_480987 [Arabidopsis lyrata subsp. lyrata] >gi|297324380|gb|EFH54800.1| hypothetical protein ARALYDRAFT_480987 [Arabidopsis lyrata subsp. lyrata]	CL574.Contig5 CL574.Contig6	6	94	0.6	*	-	CL574.Contig4	comp27993_c0_seq2	-0.622368	0.583844
CL4556.Contig1	2 2365 minus strand hypothetical protein ARALYDRAFT_475134 [Arabidopsis lyrata subsp. lyrata] >gi|297333882|gb|EFH64300.1| hypothetical protein ARALYDRAFT_475134 [Arabidopsis lyrata subsp. lyrata]		16	368	1.541	*	+	CL4556.Contig1	comp32141_c0_seq1	0.546564	0.694192
CL6501.Contig1	138 761 minus strand Ras-related protein RABH1B [Arabidopsis thaliana] >gi|75318653|sp|O80501.1|RAH1B_ARATH RecName: Full=Ras-related protein RABH1b; Short=AtRABH1b; AltName: Full=Ras-related protein Rab6A; Short=AtRab6A >gi|107738267|gb|ABF8367	CL6501.Contig2 CL6501.Contig3	8	203	1.478	*	+	CL6501.Contig1	comp29337_c0_seq2	2.24939	0.0200085
CL13005.Contig1	111 1070 minus strand T14P8.15 [Arabidopsis thaliana] >gi|7268994|emb|CAB80727.1| AT4g02340 [Arabidopsis thaliana] >gi|20856515|gb|AAM26670.1| AT4g02340/T14P8_15 [Arabidopsis thaliana] >gi|23308303|gb|AAN18121.1| At4g02340/T14P8_15 [Arabidopsis		2	53	1.336	*	+	CL13005.Contig1	comp28355_c2_seq2	-1.77715	0.356889
CL89.Contig1	1 4497 minus strand hypothetical protein ARALYDRAFT_907545 [Arabidopsis lyrata subsp. lyrata] >gi|297322380|gb|EFH52801.1| hypothetical protein ARALYDRAFT_907545 [Arabidopsis lyrata subsp. lyrata]		18	527	1.258	*	+	CL89.Contig1	comp29482_c1_seq1	31.8794	0.0489753
Unigene8133	94 1389 minus strand leucine-rich repeat family protein [Arabidopsis lyrata subsp. lyrata] >gi|297329298|gb|EFH59717.1| leucine-rich repeat family protein [Arabidopsis lyrata subsp. lyrata]		5	122	0.713	*	-	Unigene8133	comp25640_c0_seq1	-2.57759	0.02079
Unigene20278	2 961 fumarate hydratase, class II [Arabidopsis thaliana] >gi|145331433|ref|NP_001078075.1| fumarate hydratase, class II [Arabidopsis thaliana] >gi|39931311|sp|P93033.2|FUM1_ARATH RecName: Full=Fumarate hydratase 1, mitochondrial; Short=Fumarase		10	301	0.569	*	-	Unigene20278	comp29761_c1_seq4	-1.86422	0.0254223
Unigene8320	62 610 unnamed protein product [Thellungiella halophila]		11	260	0.41	*	-	Unigene8320	comp34257_c0_seq1	-0.476293	0.707192
CL5418.Contig2	75 1577 hypothetical protein ARALYDRAFT_474678 [Arabidopsis lyrata subsp. lyrata] >gi|297340401|gb|EFH70818.1| hypothetical protein ARALYDRAFT_474678 [Arabidopsis lyrata subsp. lyrata]		7	264	1.899	*	+	CL5418.Contig2	comp23682_c0_seq1	-0.886431	0.582826
Unigene2014	127 486 minus strand peroxidase precursor [Raphanus sativus var. niger]		3	92	0.63	*	-	Unigene2014	comp23002_c0_seq3	0.494819	0.760319
Unigene27210	174 692 minus strand AT2G47510 [Arabidopsis thaliana]		12	388	0.679	*	-	Unigene27210	comp34489_c0_seq1	-0.903505	0.460099
CL13302.Contig1	12 470 uncharacterized protein [Arabidopsis thaliana] >gi|30698059|ref|NP_851270.1| uncharacterized protein [Arabidopsis thaliana] >gi|332010553|gb|AED97936.1| uncharacterized protein [Arabidopsis thaliana] >gi|332010554|gb|AED97937.1| uncharacte		6	87	0.606	*	-	CL13302.Contig1	comp27653_c0_seq1	-0.845789	0.549502
CL2603.Contig2	83 1357 hypothetical protein ARALYDRAFT_484564 [Arabidopsis lyrata subsp. lyrata] >gi|297322908|gb|EFH53329.1| hypothetical protein ARALYDRAFT_484564 [Arabidopsis lyrata subsp. lyrata]		13	253	0.759	*	-	CL2603.Contig2	comp28515_c0_seq1	0.41634	0.753877
CL13814.Contig1	127 1866 DC1 domain-containing protein [Arabidopsis lyrata subsp. lyrata] >gi|297333984|gb|EFH64402.1| DC1 domain-containing protein [Arabidopsis lyrata subsp. lyrata]	CL13814.Contig2	8	287	3.011	*	+	CL13814.Contig1	comp29926_c0_seq1	-1.27076	0.143706
CL747.Contig1	143 2491 sucrose synthase 3 [Arabidopsis thaliana] >gi|15982721|gb|AAL09730.1| AT4g02280/T2H3_8 [Arabidopsis thaliana] >gi|332656750|gb|AEE82150.1| sucrose synthase 3 [Arabidopsis thaliana]	CL747.Contig2 CL747.Contig3 CL747.Contig4	3	71	2.258	*	+	CL747.Contig1	comp32101_c0_seq5	1.24164	0.292894
CL4038.Contig1	115 1242 minus strand Isocitrate dehydrogenase [NAD] catalytic subunit 5 [Arabidopsis thaliana] >gi|75249591|sp|Q945K7.1|IDH5_ARATH RecName: Full=Isocitrate dehydrogenase [NAD] catalytic subunit 5, mitochondrial; AltName: Full=IDH-V; AltName: Fu	CL4038.Contig2	7	273	0.743	*	-	CL4038.Contig1	comp35778_c0_seq1	0.314162	0.987975
CL4540.Contig1	90 1691 minus strand hypothetical protein ARALYDRAFT_472022 [Arabidopsis lyrata subsp. lyrata] >gi|297338824|gb|EFH69241.1| hypothetical protein ARALYDRAFT_472022 [Arabidopsis lyrata subsp. lyrata]	CL4540.Contig2	5	123	1.585	*	+	CL4540.Contig1	comp30659_c0_seq2	-0.860266	0.37252
CL3151.Contig2	224 1321 minus strand AT5g67360/K8K14_8 [Arabidopsis thaliana] >gi|24111425|gb|AAN46863.1| At5g67360/K8K14_8 [Arabidopsis thaliana]		10	378	0.594	*	-	CL3151.Contig2	comp20746_c0_seq1	-2.37828	0.215042
CL7675.Contig1	688 1341 minus strand hypothetical protein ARALYDRAFT_900444 [Arabidopsis lyrata subsp. lyrata] >gi|297332142|gb|EFH62561.1| hypothetical protein ARALYDRAFT_900444 [Arabidopsis lyrata subsp. lyrata]	CL7675.Contig3	6	105	1.259	*	+	CL7675.Contig1	comp30666_c3_seq5	-1.4816	0.0939423
Unigene222	135 1484 minus strand hypothetical protein ARALYDRAFT_479107 [Arabidopsis lyrata subsp. lyrata] >gi|297330981|gb|EFH61400.1| hypothetical protein ARALYDRAFT_479107 [Arabidopsis lyrata subsp. lyrata]		10	440	2.831	*	+	Unigene222	comp27177_c0_seq1	2.49369	0.00316584
CL13925.Contig1	2 2167 4-alpha-glucanotransferase [Arabidopsis thaliana] >gi|75158841|sp|Q8RXD9.1|DPE2_ARATH RecName: Full=4-alpha-glucanotransferase DPE2; AltName: Full=Amylomaltase; AltName: Full=Disproportionating enzyme; Short=D-enzyme; AltName: Full=Protein	CL13925.Contig2	9	182	1.305	*	+	CL13925.Contig1	comp29489_c0_seq1	1.23267	0.267588
CL1252.Contig1	1831 3258 minus strand RecName: Full=Probable ADP-ribosylation factor GTPase-activating protein AGD5; Short=ARF GAP AGD5; AltName: Full=Protein ARF-GAP DOMAIN 5; Short=AtAGD5; AltName: Full=Protein ZIGA3 >gi|233770206|gb|ACQ91177.1| nevershed [A	CL1252.Contig4 CL1252.Contig5 CL1252.Contig7	8	197	0.673	*	-	CL1252.Contig1	comp31887_c0_seq4	-33.1077	0.00216143
Unigene13480	52 522 minus strand 2Fe-2S ferredoxin-like protein [Arabidopsis thaliana] >gi|297829298|ref|XP_002882531.1| electron carrier/ iron ion binding protein [Arabidopsis lyrata subsp. lyrata] >gi|297328371|gb|EFH58790.1| electron carrier/ iron ion bin		5	116	1.535	*	+	Unigene13480	comp11854_c0_seq1	-0.0409028	1
Unigene24993	158 757 calmodulin-binding protein [Arabidopsis lyrata subsp. lyrata] >gi|297321265|gb|EFH51686.1| calmodulin-binding protein [Arabidopsis lyrata subsp. lyrata]		4	234	0.582	*	-	Unigene24993	comp30681_c2_seq14	0.227472	0.950102
CL12725.Contig2	99 767 minus strand 40S ribosomal protein S8-1 [Arabidopsis thaliana] >gi|75163148|sp|Q93VG5.1|RS81_ARATH RecName: Full=40S ribosomal protein S8-1 >gi|15450474|gb|AAK96530.1| AT5g20290/F5O24_180 [Arabidopsis thaliana] >gi|16974465|gb|AAL31236.1|	CL12725.Contig3	29	925	1.58	*	+	CL12725.Contig2	comp18398_c0_seq1	1.41649	0.122087
CL8969.Contig1	37 1569 serine hydroxymethyltransferase 2 [Arabidopsis thaliana] >gi|227202628|dbj|BAH56787.1| AT5G26780 [Arabidopsis thaliana] >gi|332006219|gb|AED93602.1| serine hydroxymethyltransferase 2 [Arabidopsis thaliana]		12	250	0.635	*	-	CL8969.Contig1	comp31475_c0_seq11	-0.264747	0.916934
CL14184.Contig1	83 1669 RecName: Full=Probable nucleolar protein 5-1; AltName: Full=MAR-binding NOP56/58 homolog 1; AltName: Full=NOP58-like protein F108; AltName: Full=Nucleolar protein 58-1 >gi|11878185|gb|AAG40836.1|AF302490_1 NOP58-like protein F108 [Arabido		7	313	3.115	*	+	CL14184.Contig1	comp21679_c0_seq1	-1.17939	0.315643
CL13927.Contig1	128 952 predicted protein [Arabidopsis lyrata subsp. lyrata] >gi|297327175|gb|EFH57595.1| predicted protein [Arabidopsis lyrata subsp. lyrata]	CL13927.Contig2	11	338	1.207	*	+	CL13927.Contig1	comp34333_c0_seq1	2.38904	0.00466485
CL4090.Contig3	97 1353 minus strand 26S proteasome regulatory subunit N6 [Arabidopsis thaliana] >gi|9502423|gb|AAF88122.1|AC021043_15 Similar to 26S proteasome subunits [Arabidopsis thaliana] >gi|32700024|gb|AAP86662.1| 26S proteasome subunit RPN6a [Arabidopsi		9	197	1.514	*	+	CL4090.Contig3	comp30797_c0_seq10	-0.772511	0.453423
Unigene6141	149 2044 hypothetical protein ARALYDRAFT_484140 [Arabidopsis lyrata subsp. lyrata] >gi|297322639|gb|EFH53060.1| hypothetical protein ARALYDRAFT_484140 [Arabidopsis lyrata subsp. lyrata]		5	118	1.428	*	+	Unigene6141	comp36239_c0_seq1	-0.811024	0.426712
CL319.Contig1	5 805 minus strand uncharacterized protein [Arabidopsis thaliana] >gi|332660573|gb|AEE85973.1| uncharacterized protein [Arabidopsis thaliana]	CL319.Contig4 CL319.Contig5	4	142	1.582	*	+	CL319.Contig1	comp29747_c0_seq1	0.170235	0.998461
CL3596.Contig2	46 1260 minus strand hypothetical protein ARALYDRAFT_496591 [Arabidopsis lyrata subsp. lyrata] >gi|297310715|gb|EFH41139.1| hypothetical protein ARALYDRAFT_496591 [Arabidopsis lyrata subsp. lyrata]		24	857	0.762	*	-	CL3596.Contig2	comp30853_c0_seq6	-1.58008	0.071363
CL2196.Contig2	294 1820 unnamed protein product [Thellungiella halophila]	CL2196.Contig1	10	268	1.563	*	+	CL2196.Contig2	comp21347_c0_seq1	-0.793322	0.526679
CL6390.Contig1	527 1891 chloroplast elongation factor tub [Arabidopsis lyrata subsp. lyrata] >gi|297315771|gb|EFH46194.1| chloroplast elongation factor tub [Arabidopsis lyrata subsp. lyrata]	CL6390.Contig2 CL6390.Contig3	7	184	1.72	*	+	CL6390.Contig1	comp32033_c0_seq4	0.477684	0.837231
Unigene14803	198 356 minus strand uncharacterized protein [Arabidopsis thaliana] >gi|106879137|gb|ABF82598.1| At3g01130 [Arabidopsis thaliana] >gi|332640092|gb|AEE73613.1| uncharacterized protein [Arabidopsis thaliana]		3	39	0.415	*	-	Unigene14803	comp13596_c0_seq1	-0.0300223	1
Unigene2790	3 743 hypothetical protein ARALYDRAFT_471331 [Arabidopsis lyrata subsp. lyrata] >gi|297335741|gb|EFH66158.1| hypothetical protein ARALYDRAFT_471331 [Arabidopsis lyrata subsp. lyrata]		9	200	0.585	*	-	Unigene2790	comp27638_c0_seq1	-1.04486	0.418497
Unigene21215	82 597 minus strand RecName: Full=Peptidyl-prolyl cis-trans isomerase; Short=PPIase; AltName: Full=Cyclophilin; AltName: Full=Cyclosporin A-binding protein; AltName: Full=Rotamase >gi|1220142|emb|CAA59468.1| cyclophilin [Catharanthus roseus] >gi		42	697	0.413	*	-	Unigene21215	comp31492_c0_seq1	1.67507	0.0482919
Unigene15048	32 2410 subtilase family protein [Arabidopsis thaliana] >gi|9758669|dbj|BAB09208.1| subtilisin-like protease [Arabidopsis thaliana] >gi|332007897|gb|AED95280.1| subtilase family protein [Arabidopsis thaliana]		7	206	0.568	*	-	Unigene15048	comp19948_c0_seq1	1.01945	0.289075
CL8612.Contig1	115 480 minus strand predicted protein [Arabidopsis lyrata subsp. lyrata] >gi|297318706|gb|EFH49128.1| predicted protein [Arabidopsis lyrata subsp. lyrata]	CL8612.Contig2	4	109	1.513	*	+	CL8612.Contig1	comp10208_c0_seq1	0.408883	0.860995
CL3281.Contig6	151 789 minus strand hypothetical protein ARALYDRAFT_492144 [Arabidopsis lyrata subsp. lyrata] >gi|297313390|gb|EFH43813.1| hypothetical protein ARALYDRAFT_492144 [Arabidopsis lyrata subsp. lyrata]		2	87	3.12	*	+	CL3281.Contig6	comp26100_c0_seq2	2.50185	0.0108677
CL3491.Contig2	2 1018 aspartyl protease family protein [Arabidopsis thaliana] >gi|332003717|gb|AED91100.1| aspartyl protease family protein [Arabidopsis thaliana]		9	1364	0.452	*	-	CL3491.Contig2	comp11039_c0_seq1	33.1749	0.00135711
CL2252.Contig2	102 1583 minus strand glycoside hydrolase family 28 protein [Arabidopsis lyrata subsp. lyrata] >gi|297315613|gb|EFH46036.1| glycoside hydrolase family 28 protein [Arabidopsis lyrata subsp. lyrata]		5	252	0.498	*	-	CL2252.Contig2	comp29995_c0_seq2	0.282917	0.864434
CL5835.Contig1	68 991 minus strand molybdenum cofactor sulfurase family protein [Arabidopsis lyrata subsp. lyrata] >gi|297311163|gb|EFH41587.1| molybdenum cofactor sulfurase family protein [Arabidopsis lyrata subsp. lyrata]		8	256	0.581	*	-	CL5835.Contig1	comp24960_c0_seq2	-1.4084	0.110604
CL7857.Contig1	168 2588 minus strand hypothetical protein ARALYDRAFT_491315 [Arabidopsis lyrata subsp. lyrata] >gi|297315037|gb|EFH45460.1| hypothetical protein ARALYDRAFT_491315 [Arabidopsis lyrata subsp. lyrata]		7	119	0.749	*	-	CL7857.Contig1	comp31159_c0_seq1	-0.815396	0.476936
CL2857.Contig1	219 836 minus strand CBS domain-containing protein [Arabidopsis lyrata subsp. lyrata] >gi|297319318|gb|EFH49740.1| CBS domain-containing protein [Arabidopsis lyrata subsp. lyrata]	CL2857.Contig3	12	473	0.589	*	-	CL2857.Contig1	comp31935_c0_seq10	-32.5265	0.0136901
CL1667.Contig1	105 1079 minus strand polygalacturonase inhibitory protein [Brassica rapa subsp. campestris]		20	836	0.672	*	-	CL1667.Contig1	comp5492_c0_seq1	-0.793322	0.644593
Unigene29720	71 922 hypothetical protein ARALYDRAFT_346169 [Arabidopsis lyrata subsp. lyrata] >gi|297327754|gb|EFH58174.1| hypothetical protein ARALYDRAFT_346169 [Arabidopsis lyrata subsp. lyrata]		8	152	0.651	*	-	Unigene29720	comp12372_c1_seq1	-0.0663406	1
Unigene19903	1 552 hypothetical protein ARALYDRAFT_491361 [Arabidopsis lyrata subsp. lyrata] >gi|297313028|gb|EFH43451.1| hypothetical protein ARALYDRAFT_491361 [Arabidopsis lyrata subsp. lyrata]		3	72	0.684	*	-	Unigene19903	comp12879_c0_seq1	-0.0851688	0.998461
CL2072.Contig1	33 668 minus strand unknown [Arabidopsis thaliana]		2	107	0.652	*	-	CL2072.Contig1	comp28997_c0_seq3	-0.25487	0.889098
CL9131.Contig2	37 1266 hypothetical protein ARALYDRAFT_332986 [Arabidopsis lyrata subsp. lyrata] >gi|297309078|gb|EFH39503.1| hypothetical protein ARALYDRAFT_332986 [Arabidopsis lyrata subsp. lyrata]		18	641	0.765	*	-	CL9131.Contig2	comp25115_c2_seq1	0.598995	0.821569
CL4042.Contig1	110 721 minus strand hypothetical protein ARALYDRAFT_495531 [Arabidopsis lyrata subsp. lyrata] >gi|297310172|gb|EFH40596.1| hypothetical protein ARALYDRAFT_495531 [Arabidopsis lyrata subsp. lyrata]		22	625	0.317	*	-	CL4042.Contig1	comp33985_c0_seq1	0.267628	0.927912
Unigene29828	111 1184 minus strand band 7 family protein [Arabidopsis lyrata subsp. lyrata] >gi|297321047|gb|EFH51468.1| band 7 family protein [Arabidopsis lyrata subsp. lyrata]		10	194	1.453	*	+	Unigene29828	comp33545_c0_seq1	-1.29482	0.140211
Unigene2463	73 474 minus strand histone H2B [Arabidopsis thaliana] >gi|75181341|sp|Q9LZT0.3|H2B7_ARATH RecName: Full=Histone H2B.7; AltName: Full=HTB11 >gi|7630031|emb|CAB88327.1| histone H2B-like protein [Arabidopsis thaliana] >gi|21536602|gb|AAM60934.1| h	Unigene2464 CL3258.Contig2 CL3258.Contig3	4	716	2.814	*	+	Unigene2463	comp28801_c1_seq2	0.425232	0.726169
Unigene25836	1 288 minus strand mthsc70-1 [Arabidopsis lyrata subsp. lyrata] >gi|297312760|gb|EFH43183.1| mthsc70-1 [Arabidopsis lyrata subsp. lyrata]		2	103	1.654	*	+	Unigene25836	comp28434_c0_seq1	0.566532	0.609414
Unigene26618	2 940 sulphite reductase [Arabidopsis thaliana]		7	126	1.39	*	+	Unigene26618	comp99090_c0_seq1	0.639637	0.852408
Unigene24672	3 692 putative dihydrolipoamide succinyltransferase [Arabidopsis thaliana] >gi|7269544|emb|CAB79546.1| putative dihydrolipoamide succinyltransferase [Arabidopsis thaliana]		11	264	0.642	*	-	Unigene24672	comp31405_c0_seq3	0.562661	0.633561
Unigene6416	1 711 minus strand chloroplast MPBQ/MSBQ methyltransferase [Brassica napus]		2	87	1.324	*	+	Unigene6416	comp21149_c0_seq1	0.652664	0.587457
CL9571.Contig1	25 462 minus strand 60S ribosomal protein L26-1 [Arabidopsis thaliana] >gi|297816242|ref|XP_002876004.1| 60S ribosomal protein L26 [Arabidopsis lyrata subsp. lyrata] >gi|27735242|sp|P51414.2|RL261_ARATH RecName: Full=60S ribosomal protein L26-1	CL9571.Contig2 Unigene25920	9	256	1.446	*	+	CL9571.Contig1	comp31802_c2_seq1	1.10466	0.212828
CL6847.Contig1	112 711 peptidyl-prolyl isomerase H (cyclophilin H) [Arabidopsis thaliana] >gi|30102910|gb|AAP21373.1| At2g38730 [Arabidopsis thaliana] >gi|45680872|gb|AAS75305.1| single domain cyclophilin type peptidyl-prolyl cis-trans isomerase [Arabidopsis th		8	267	0.626	*	-	CL6847.Contig1	comp24755_c0_seq1	0.761893	0.504274
CL2368.Contig1	70 774 minus strand proteasome subunit alpha type-2-A [Arabidopsis thaliana] >gi|79318062|ref|NP_001031057.1| proteasome subunit alpha type-2-A [Arabidopsis thaliana] >gi|6093778|sp|O23708.1|PSA2A_ARATH RecName: Full=Proteasome subunit alpha typ		31	865	0.574	*	-	CL2368.Contig1	comp30681_c1_seq1	-0.00932616	1
CL11423.Contig1	306 621 LEN=621; translated	CL11423.Contig2	34	909	0.417	*	-	CL11423.Contig1	comp23157_c0_seq1	0.848355	0.383146
Unigene8343	50 259 peroxidase 32 [Arabidopsis thaliana] >gi|166898075|sp|Q9LHB9.3|PER32_ARATH RecName: Full=Peroxidase 32; Short=Atperox P32; AltName: Full=ATP16a; AltName: Full=PRXR3; Flags: Precursor >gi|9884625|dbj|BAB02631.1| peroxidase [Arabidopsis thal		8	68	0.602	*	-	Unigene8343	comp18851_c0_seq1	-0.767581	0.465635
CL3537.Contig1	2 2560 minus strand phosphoenolpyruvate carboxylase [Brassica juncea]		17	400	1.882	*	+	CL3537.Contig1	comp25106_c0_seq1	1.47614	0.168848
DEPs_NDEGs (144)
Protein	Description	Sameset	Pep_num	Score	Quantition(CK_all_results/pb-1000)	Sig	diff_Protein	GeneID&ProteinID	GeneID	log2(CK_all_results/pb-1000)	Fdr	diff_gene
CL14662.Contig1	34 1056 minus strand basic glucanase [Brassica juncea]		25	754	1.003			CL14662.Contig1	comp26226_c0_seq2	-5.20836	0.000671651	-
CL5897.Contig1	1 1203 minus strand S9 Tyrosyl aminopeptidase [Raphanus sativus]		2	70	1.423			CL5897.Contig1	comp31932_c0_seq4	-34.8597	1.52e-06	-
CL2410.Contig1	176 874 minus strand hypothetical protein ARALYDRAFT_485817 [Arabidopsis lyrata subsp. lyrata] >gi|297322084|gb|EFH52505.1| hypothetical protein ARALYDRAFT_485817 [Arabidopsis lyrata subsp. lyrata]		2	66	0.933			CL2410.Contig1	comp42340_c0_seq1	-4.14696	0.000705527	-
CL8227.Contig1	58 1878 minus strand unnamed protein product [Thellungiella halophila]	CL8227.Contig2	16	380	1.187			CL8227.Contig1	comp12261_c0_seq1	-5.23073	6.24e-08	-
Unigene7150	55 747 hypothetical protein ARALYDRAFT_914296 [Arabidopsis lyrata subsp. lyrata] >gi|297315627|gb|EFH46050.1| hypothetical protein ARALYDRAFT_914296 [Arabidopsis lyrata subsp. lyrata]		7	185	0.547			Unigene7150	comp14120_c0_seq1	-4.85478	4.97e-08	-
Unigene29728	70 852 minus strand hypothetical protein ARALYDRAFT_494916 [Arabidopsis lyrata subsp. lyrata] >gi|297311484|gb|EFH41908.1| hypothetical protein ARALYDRAFT_494916 [Arabidopsis lyrata subsp. lyrata]		4	137	0.629			Unigene29728	comp13014_c0_seq1	3.16419	0.00064787	+
CL8166.Contig1	27 2213 protein GRIP [Arabidopsis thaliana] >gi|205785634|sp|Q8S2T0.2|GRIP_ARATH RecName: Full=Protein GRIP; Short=AtGRIP >gi|332010760|gb|AED98143.1| protein GRIP [Arabidopsis thaliana]		4	101	0.841			CL8166.Contig1	comp31018_c0_seq4	34.6444	3.49e-06	+
CL3756.Contig1	111 1517 minus strand UDP-glucose pyrophosphorylase [Arabidopsis lyrata subsp. lyrata] >gi|297330206|gb|EFH60625.1| UDP-glucose pyrophosphorylase [Arabidopsis lyrata subsp. lyrata]		43	1283	1.1			CL3756.Contig1	comp25565_c0_seq8	3.94204	0.000260482	+
CL6093.Contig2	39 1292 minus strand protein-protein interaction regulator family protein [Arabidopsis thaliana] >gi|332191160|gb|AEE29281.1| protein-protein interaction regulator family protein [Arabidopsis thaliana]		2	65	1.005			CL6093.Contig2	comp12945_c0_seq1	-35.614	3.35e-08	-
Unigene8412	82 615 minus strand pyrophosphate--fructose-6-phosphate 1-phosphotransferase [Arabidopsis thaliana] >gi|332656965|gb|AEE82365.1| pyrophosphate--fructose-6-phosphate 1-phosphotransferase [Arabidopsis thaliana]		5	229	0.944			Unigene8412	comp11053_c0_seq1	-3.44102	0.000383323	-
CL8755.Contig3	99 698 uncharacterized protein [Arabidopsis thaliana] >gi|332641111|gb|AEE74632.1| uncharacterized protein [Arabidopsis thaliana]		2	47	1.05			CL8755.Contig3	comp27098_c0_seq1	3.94527	4.6e-06	+
Unigene20382	109 1068 Nitrilase 2 OS=Arabidopsis thaliana GN=NIT2 PE=1 SV=1		11	469	1.106			Unigene20382	comp14490_c0_seq1	-4.58044	1.27e-06	-
CL6763.Contig1	58 1734 minus strand zeta-carotene desaturase [Brassica napus] >gi|345451252|gb|AEN94306.1| zeta-carotene desaturase [Brassica napus]	CL6763.Contig2	3	86	0.943			CL6763.Contig1	comp10120_c0_seq1	-34.8627	1.37e-06	-
CL9841.Contig1	38 757 minus strand hypothetical protein ARALYDRAFT_316436 [Arabidopsis lyrata subsp. lyrata] >gi|297333413|gb|EFH63831.1| hypothetical protein ARALYDRAFT_316436 [Arabidopsis lyrata subsp. lyrata]		2	61	1.622			CL9841.Contig1	comp26214_c0_seq1	-3.95559	7.57e-05	-
CL8676.Contig1	140 1276 minus strand trehalose-6-phosphate synthase, putative [Brassica oleracea]	CL8676.Contig2	4	93	1.083			CL8676.Contig1	comp31252_c0_seq4	3.10185	0.000250124	+
CL2825.Contig2	3 1262 minus strand SKU5 similar 5 protein [Arabidopsis thaliana] >gi|6573725|gb|AAF17645.1|AC009978_21 T23E18.10 [Arabidopsis thaliana] >gi|222423158|dbj|BAH19558.1| AT1G76160 [Arabidopsis thaliana] >gi|332197683|gb|AEE35804.1| SKU5 similar 5 p		7	283	1.054			CL2825.Contig2	comp27877_c0_seq4	34.1818	3.07e-05	+
CL7165.Contig1	183 1196 minus strand hypothetical protein ARALYDRAFT_487751 [Arabidopsis lyrata subsp. lyrata] >gi|297317204|gb|EFH47626.1| hypothetical protein ARALYDRAFT_487751 [Arabidopsis lyrata subsp. lyrata]	CL7165.Contig2	4	85	0.984			CL7165.Contig1	comp29979_c0_seq7	34.7874	1.86e-06	+
CL3667.Contig1	475 2013 minus strand uncharacterized protein [Arabidopsis thaliana] >gi|332007166|gb|AED94549.1| uncharacterized protein [Arabidopsis thaliana]		5	481	0.958			CL3667.Contig1	comp31176_c0_seq10	-4.02132	7.59e-05	-
CL11253.Contig1	1228 1626 myrosinase binding protein [Brassica napus]		4	86	2.502			CL11253.Contig1	comp25731_c0_seq1	3.95921	4.62e-06	+
CL7358.Contig1	176 973 minus strand hypothetical protein ARALYDRAFT_897138 [Arabidopsis lyrata subsp. lyrata] >gi|297328476|gb|EFH58895.1| hypothetical protein ARALYDRAFT_897138 [Arabidopsis lyrata subsp. lyrata]		4	55	1.061			CL7358.Contig1	comp25486_c0_seq1	35.0156	6.36e-07	+
CL11926.Contig1	9 1718 minus strand hypothetical protein ARALYDRAFT_912279 [Arabidopsis lyrata subsp. lyrata] >gi|297312626|gb|EFH43049.1| hypothetical protein ARALYDRAFT_912279 [Arabidopsis lyrata subsp. lyrata]		2	61	0.899			CL11926.Contig1	comp30349_c1_seq1	4.63247	1.17e-05	+
CL14726.Contig1	3 1796 minus strand PA-domain containing subtilase family protein [Arabidopsis thaliana] >gi|4938478|emb|CAB43837.1| proteinase-like protein [Arabidopsis thaliana] >gi|7269902|emb|CAB80995.1| AT4g30020 [Arabidopsis thaliana] >gi|22655014|gb|AAM9		5	187	0.866			CL14726.Contig1	comp30843_c0_seq14	3.70456	0.000285923	+
Unigene6429	187 339 RecName: Full=Phospholipase D alpha 2; Short=PLD 2; AltName: Full=Choline phosphatase 2; AltName: Full=Phosphatidylcholine-hydrolyzing phospholipase D 2; Flags: Precursor >gi|3639087|gb|AAC78486.1| phospholipase D2 [Brassica oleracea var.		6	108	2.172			Unigene6429	comp31264_c1_seq1	5.28062	3.78e-09	+
CL3234.Contig6	3 1808 minus strand ATGCN3 [Arabidopsis lyrata subsp. lyrata] >gi|297333716|gb|EFH64134.1| ATGCN3 [Arabidopsis lyrata subsp. lyrata]		6	165	0.988			CL3234.Contig6	comp27945_c0_seq2	-7.96203	0.000705527	-
CL13336.Contig1	121 1416 minus strand glycine-rich protein [Arabidopsis thaliana] >gi|332661567|gb|AEE86967.1| glycine-rich protein [Arabidopsis thaliana]	CL13336.Contig2	10	224	0.882			CL13336.Contig1	comp27309_c0_seq2	-36.4372	4.42e-10	-
CL1543.Contig5	82 2025 minus strand heat shock 70kDa protein 1/8 [Arabidopsis thaliana] >gi|12643273|sp|P22953.3|MD37E_ARATH RecName: Full=Probable mediator of RNA polymerase II transcription subunit 37e; AltName: Full=Heat shock 70 kDa protein 1; AltName: Ful		4	2385	1.582			CL1543.Contig5	comp26010_c0_seq3	-3.28322	0.000260482	-
Unigene9390	1 225 hypothetical protein ARALYDRAFT_342166 [Arabidopsis lyrata subsp. lyrata] >gi|297331199|gb|EFH61618.1| hypothetical protein ARALYDRAFT_342166 [Arabidopsis lyrata subsp. lyrata]		4	233	0.864			Unigene9390	comp31786_c0_seq2	33.7815	0.000152415	+
CL841.Contig1	29 781 minus strand HAD superfamily, subfamily IIIB acid phosphatase [Arabidopsis thaliana] >gi|7269824|emb|CAB79684.1| acid phosphatase-like protein [Arabidopsis thaliana] >gi|332660208|gb|AEE85608.1| HAD superfamily, subfamily IIIB acid phosph	CL841.Contig2	5	98	0.84			CL841.Contig1	comp49866_c0_seq1	33.6056	0.000314086	+
Unigene6768	2 286 NAD-dependent isocitrate dehydrogenase gamma subunit [Brassica napus] >gi|28974506|gb|AAO61649.1| NAD-dependent isocitrate dehydrogenase gamma subunit [Brassica napus] >gi|28974508|gb|AAO61650.1| NAD-dependent isocitrate dehydrogenase gamma		2	178	0.558			Unigene6768	comp31249_c1_seq4	-5.00317	1.45e-07	-
Unigene414	183 1637 putative diaminopimelate decarboxylase [Brassica napus]		9	205	0.903			Unigene414	comp31643_c1_seq1	-34.2806	2.03e-05	-
CL1027.Contig2	129 1187 minus strand peroxidase 34 [Arabidopsis thaliana] >gi|25453220|sp|Q9SMU8.1|PER34_ARATH RecName: Full=Peroxidase 34; Short=Atperox P34; AltName: Full=ATPCb; Flags: Precursor >gi|16930431|gb|AAL31901.1|AF419569_1 AT3g49120/T2J13_40 [Arabi	CL1027.Contig3	13	656	0.794			CL1027.Contig2	comp27698_c0_seq1	4.01652	2.26e-05	+
CL859.Contig1	2 334 hypothetical protein ARALYDRAFT_488161 [Arabidopsis lyrata subsp. lyrata] >gi|297319448|gb|EFH49870.1| hypothetical protein ARALYDRAFT_488161 [Arabidopsis lyrata subsp. lyrata]		4	138	1.24			CL859.Contig1	comp23392_c0_seq1	-6.37808	3.92e-06	-
CL9803.Contig1	362 1723 oxysterol-binding family protein [Arabidopsis lyrata subsp. lyrata] >gi|297310468|gb|EFH40892.1| oxysterol-binding family protein [Arabidopsis lyrata subsp. lyrata]	CL9803.Contig2	5	166	3.086			CL9803.Contig1	comp30163_c0_seq1	33.4613	0.000570552	+
CL14642.Contig3	111 878 minus strand 1433-3 [Brassica napus] >gi|224981579|gb|ACN73537.1| 1433-3 [Brassica napus]		3	362	1.212			CL14642.Contig3	comp28266_c0_seq4	35.0978	4.48e-07	+
CL11249.Contig1	197 1732 minus strand hypothetical protein ARALYDRAFT_496464 [Arabidopsis lyrata subsp. lyrata] >gi|297310655|gb|EFH41079.1| hypothetical protein ARALYDRAFT_496464 [Arabidopsis lyrata subsp. lyrata]		2	87	0.879			CL11249.Contig1	comp27170_c0_seq4	-34.1653	3.58e-05	-
CL12427.Contig1	25 513 AT4g33720 [Arabidopsis thaliana] >gi|3549674|emb|CAA20585.1| pathogenesis-related protein 1 precursor, 19.3K [Arabidopsis thaliana] >gi|7270321|emb|CAB80089.1| pathogenesis-related protein 1 precursor, 19.3K [Arabidopsis thaliana] >gi|1451		3	190	1.435			CL12427.Contig1	comp32394_c0_seq1	-6.89701	3.85e-12	-
CL10204.Contig1	244 2130 hypothetical protein ARALYDRAFT_490390 [Arabidopsis lyrata subsp. lyrata] >gi|297318708|gb|EFH49130.1| hypothetical protein ARALYDRAFT_490390 [Arabidopsis lyrata subsp. lyrata]		3	134	1.14			CL10204.Contig1	comp32440_c0_seq1	-6.76701	1.1e-12	-
CL1605.Contig4	72 578 minus strand hypothetical protein ARALYDRAFT_491553 [Arabidopsis lyrata subsp. lyrata] >gi|297315146|gb|EFH45569.1| hypothetical protein ARALYDRAFT_491553 [Arabidopsis lyrata subsp. lyrata]		6	220	1.818			CL1605.Contig4	comp24022_c0_seq3	33.7782	0.000152415	+
CL1427.Contig1	630 1376 minus strand Contains a weak similarity to a farnesylated protein GMFP5 mRNA from Glycine max gb|U64916. ESTs gb|AI993148, gb|T44360 come from this gene [Arabidopsis thaliana]	CL1427.Contig2 CL1427.Contig3 CL1427.Contig4 CL1427.Contig5 CL1427.Contig6 CL1427.Contig7 CL1427.Contig8 CL1427.Contig9	4	128	1.986			CL1427.Contig1	comp20083_c0_seq3	6.83958	6.87e-05	+
CL9536.Contig1	119 1042 minus strand smad nuclear-interacting protein 1 [Arabidopsis thaliana] >gi|75162460|sp|Q8W4D8.1|DDL_ARATH RecName: Full=FHA domain-containing protein DDL; AltName: Full=Protein DAWDLE >gi|332642873|gb|AEE76394.1| smad nuclear-interactin	CL9536.Contig2	2	75	1.092			CL9536.Contig1	comp17592_c0_seq1	3.81401	0.000439687	+
CL3718.Contig1	3 2117 minus strand vesicle-fusing ATPase [Arabidopsis thaliana] >gi|28201831|sp|Q9M0Y8.2|NSF_ARATH RecName: Full=Vesicle-fusing ATPase; AltName: Full=N-ethylmaleimide-sensitive fusion protein; AltName: Full=Vesicular-fusion protein NSF >gi|2085	CL3718.Contig2	11	297	1.214			CL3718.Contig1	comp10806_c0_seq1	-3.55886	0.000814016	-
CL731.Contig2	2 259 putative aspartyl protease [Arabidopsis thaliana]		2	104	0.654			CL731.Contig2	comp23329_c0_seq2	34.6213	3.92e-06	+
CL2459.Contig1	2 1066 minus strand hypothetical protein ARALYDRAFT_471639 [Arabidopsis lyrata subsp. lyrata] >gi|297338660|gb|EFH69077.1| hypothetical protein ARALYDRAFT_471639 [Arabidopsis lyrata subsp. lyrata]		2	59	0.854			CL2459.Contig1	comp32167_c0_seq1	34.983	7.62e-07	+
CL279.Contig2	63 1502 minus strand RecName: Full=Probable UDP-glucose 6-dehydrogenase 2; Short=UDP-Glc dehydrogenase 2; Short=UDP-GlcDH 2; Short=UDPGDH 2 >gi|10177680|dbj|BAB11006.1| UDP-glucose dehydrogenase [Arabidopsis thaliana]	CL279.Contig3	13	847	1.186			CL279.Contig2	comp30284_c0_seq2	3.08835	0.000265753	+
CL14339.Contig1	187 438 minus strand glutamate decarboxylase 2 [Brassica juncea]		9	226	2.708			CL14339.Contig1	comp27380_c0_seq1	-3.41223	0.000283569	-
Unigene8275	49 777 tubulin folding cofactor B [Arabidopsis thaliana] >gi|51970508|dbj|BAD43946.1| tubulin folding cofactor B [Arabidopsis thaliana] >gi|51970674|dbj|BAD44029.1| tubulin folding cofactor B [Arabidopsis thaliana] >gi|332641352|gb|AEE74873.1| tu		2	89	1.618			Unigene8275	comp23886_c0_seq1	-7.23339	5.47e-08	-
CL7610.Contig1	155 745 minus strand hypothetical protein ARALYDRAFT_477902 [Arabidopsis lyrata subsp. lyrata] >gi|297330393|gb|EFH60812.1| hypothetical protein ARALYDRAFT_477902 [Arabidopsis lyrata subsp. lyrata]		4	79	0.662			CL7610.Contig1	comp25936_c0_seq1	4.57195	1.74e-06	+
Unigene1157	213 797 DNA binding protein [Brassica rapa]		3	122	1.151			Unigene1157	comp25965_c0_seq2	35.601	3.59e-08	+
Unigene3032	1 486 minus strand hypothetical protein [Arabidopsis thaliana]		2	86	0.86			Unigene3032	comp27635_c0_seq2	33.3717	0.000705527	+
CL12901.Contig2	5 301 minus strand leucine-rich repeat family protein [Arabidopsis lyrata subsp. lyrata] >gi|297315756|gb|EFH46179.1| leucine-rich repeat family protein [Arabidopsis lyrata subsp. lyrata]		3	87	0.745			CL12901.Contig2	comp26615_c0_seq1	3.72341	8.62e-05	+
CL7485.Contig1	78 1487 minus strand hypothetical protein ARALYDRAFT_915517 [Arabidopsis lyrata subsp. lyrata] >gi|297314163|gb|EFH44586.1| hypothetical protein ARALYDRAFT_915517 [Arabidopsis lyrata subsp. lyrata]		20	528	0.967			CL7485.Contig1	comp23759_c0_seq1	-3.76713	7.42e-06	-
Unigene7765	48 248 hypothetical protein ARALYDRAFT_326224 [Arabidopsis lyrata subsp. lyrata] >gi|297317638|gb|EFH48060.1| hypothetical protein ARALYDRAFT_326224 [Arabidopsis lyrata subsp. lyrata]		4	147	0.904			Unigene7765	comp17545_c0_seq1	33.4782	0.000466734	+
Unigene26151	2 910 minus strand L-ascorbate oxidase homolog OS=Brassica napus GN=Bp10 PE=2 SV=1		2	72	0.304			Unigene26151	comp29589_c0_seq3	5.75747	4.95e-07	+
Unigene8540	1 1224 minus strand ureidoglycolate amidohydrolase [Arabidopsis thaliana] >gi|110741173|dbj|BAF02137.1| N-carbamyl-L-amino acid amidohydrolase-like protein [Arabidopsis thaliana] >gi|332007603|gb|AED94986.1| ureidoglycolate amidohydrolase [Arabi		11	349	0.938			Unigene8540	comp11361_c0_seq1	-2.84017	0.000876433	-
CL261.Contig1	76 1149 diaminopimelate epimerase [Arabidopsis thaliana] >gi|75263858|sp|Q9LFG2.1|DAPF_ARATH RecName: Full=Diaminopimelate epimerase, chloroplastic; Short=DAP epimerase; Flags: Precursor >gi|6729509|emb|CAB67665.1| diaminopimelate epimerase-like		3	95	1.235			CL261.Contig1	comp26983_c0_seq2	35.4128	9.33e-08	+
Unigene21306	1 1752 minus strand hypothetical protein ARALYDRAFT_486740 [Arabidopsis lyrata subsp. lyrata] >gi|297324292|gb|EFH54713.1| hypothetical protein ARALYDRAFT_486740 [Arabidopsis lyrata subsp. lyrata]		11	202	1.061			Unigene21306	comp26941_c0_seq1	33.3518	0.000872686	+
Unigene6874	41 514 pathogenesis-related protein 1 [Brassica rapa subsp. campestris]		9	272	1.39			Unigene6874	comp32354_c0_seq1	-9.81291	7.36e-16	-
CL3458.Contig2	251 649 minus strand vesicle associated protein [Arabidopsis thaliana] >gi|75161609|sp|Q8VZ95.1|VAP11_ARATH RecName: Full=Vesicle-associated protein 1-1; AltName: Full=Plant VAP homolog 11; Short=AtPVA11; AltName: Full=VAMP-associated protein 1-	CL3458.Contig3	2	111	1.58			CL3458.Contig2	comp31591_c0_seq8	33.7649	0.000181495	+
Unigene13244	1 420 AT4g33720 [Arabidopsis thaliana] >gi|3549674|emb|CAA20585.1| pathogenesis-related protein 1 precursor, 19.3K [Arabidopsis thaliana] >gi|7270321|emb|CAB80089.1| pathogenesis-related protein 1 precursor, 19.3K [Arabidopsis thaliana] >gi|14517		4	120	0.592			Unigene13244	comp11706_c0_seq1	-3.69665	5.69e-05	-
CL1362.Contig1	206 1279 minus strand hypothetical protein ARALYDRAFT_906673 [Arabidopsis lyrata subsp. lyrata] >gi|297323731|gb|EFH54152.1| hypothetical protein ARALYDRAFT_906673 [Arabidopsis lyrata subsp. lyrata]		44	1374	1.009			CL1362.Contig1	comp25628_c0_seq1	-4.03618	1.6e-05	-
CL1624.Contig1	2 427 minus strand polygalacturonase, putative [Arabidopsis thaliana]		2	227	0.757			CL1624.Contig1	comp24993_c0_seq2	34.0423	5.71e-05	+
CL9573.Contig7	2 586 minus strand hypothetical protein ARALYDRAFT_476670 [Arabidopsis lyrata subsp. lyrata] >gi|297334859|gb|EFH65277.1| hypothetical protein ARALYDRAFT_476670 [Arabidopsis lyrata subsp. lyrata]		2	105	3.207			CL9573.Contig7	comp27901_c1_seq1	5.95662	6.46e-06	+
CL3500.Contig2	3 728 predicted protein [Arabidopsis lyrata subsp. lyrata] >gi|297325866|gb|EFH56286.1| predicted protein [Arabidopsis lyrata subsp. lyrata]		3	81	0.729			CL3500.Contig2	comp25173_c0_seq1	-33.5485	0.000466734	-
CL4517.Contig1	166 1590 AAT/ATAAT/MEE17 [Arabidopsis lyrata subsp. lyrata] >gi|297326277|gb|EFH56697.1| AAT/ATAAT/MEE17 [Arabidopsis lyrata subsp. lyrata]		2	105	1.177			CL4517.Contig1	comp31342_c0_seq1	35.1735	2.9e-07	+
CL10468.Contig1	93 1913 minus strand transducin family protein [Arabidopsis lyrata subsp. lyrata] >gi|297328945|gb|EFH59364.1| transducin family protein [Arabidopsis lyrata subsp. lyrata]	CL10468.Contig2	7	275	0.907			CL10468.Contig1	comp26175_c0_seq2	35.3858	1.07e-07	+
Unigene2151	2 289 minus strand beta-Ig-H3 domain-containing protein [Arabidopsis lyrata subsp. lyrata] >gi|297317054|gb|EFH47476.1| beta-Ig-H3 domain-containing protein [Arabidopsis lyrata subsp. lyrata]		2	93	2.093			Unigene2151	comp31017_c1_seq5	35.0706	4.9e-07	+
Unigene6615	2 154 minus strand nuclear RNA binding protein, putative [Brassica oleracea]		3	82	0.734			Unigene6615	comp28651_c0_seq1	-5.66107	5.93e-07	-
Unigene20739	198 770 transcription factor lim1 [Arabidopsis thaliana] >gi|13926190|gb|AAK49575.1|AF370569_1 similar to transcription factor SF3 (pir|IS37656) [Arabidopsis thaliana] >gi|332190431|gb|AEE28552.1| transcription factor lim1 [Arabidopsis thaliana]		2	61	0.985			Unigene20739	comp24711_c0_seq1	3.47496	0.000939799	+
CL3664.Contig11	20 637 unnamed protein product [Thellungiella halophila]		4	115	0.816			CL3664.Contig11	comp25342_c1_seq1	5.3308	6.46e-06	+
Unigene29575	12 347 minus strand uncharacterized protein [Arabidopsis thaliana] >gi|332640097|gb|AEE73618.1| uncharacterized protein [Arabidopsis thaliana]		3	91	1.587			Unigene29575	comp27937_c1_seq2	34.3238	1.55e-05	+
Unigene8614	597 1238 minus strand predicted protein [Arabidopsis thaliana] >gi|7270037|emb|CAB79853.1| predicted protein [Arabidopsis thaliana]		3	70	0.469			Unigene8614	comp34249_c0_seq1	8.47112	2.18e-11	+
CL1738.Contig1	24 3128 Nucleoporin autopeptidase [Arabidopsis thaliana] >gi|79317517|ref|NP_001031018.1| Nucleoporin autopeptidase [Arabidopsis thaliana] >gi|19310423|gb|AAL84948.1| At1g10390/F14N23_29 [Arabidopsis thaliana] >gi|27764948|gb|AAO23595.1| At1g1039		6	188	0.939			CL1738.Contig1	comp31883_c0_seq5	33.7088	0.000216757	+
CL4585.Contig1	10 1161 minus strand unnamed protein product [Thellungiella halophila]		4	341	0.691			CL4585.Contig1	comp27113_c0_seq6	-34.6226	4.41e-06	-
CL1417.Contig1	98 412 hypothetical protein ARALYDRAFT_915104 [Arabidopsis lyrata subsp. lyrata] >gi|297315993|gb|EFH46416.1| hypothetical protein ARALYDRAFT_915104 [Arabidopsis lyrata subsp. lyrata]		2	176	0.572			CL1417.Contig1	comp27019_c0_seq3	34.5445	5.58e-06	+
CL8380.Contig1	121 1521 minus strand cystathionine beta-lyase [Arabidopsis thaliana] >gi|1708993|sp|P53780.1|METC_ARATH RecName: Full=Cystathionine beta-lyase, chloroplastic; Short=CBL; AltName: Full=Beta-cystathionase; AltName: Full=Cysteine lyase; Flags: Pre		4	126	0.927			CL8380.Contig1	comp27478_c0_seq2	3.1075	0.000164498	+
CL10836.Contig1	2 148 hypothetical protein ARALYDRAFT_482625 [Arabidopsis lyrata subsp. lyrata] >gi|297327284|gb|EFH57704.1| hypothetical protein ARALYDRAFT_482625 [Arabidopsis lyrata subsp. lyrata]	CL10836.Contig2	3	55	0.803			CL10836.Contig1	comp25628_c2_seq2	-35.8816	8.47e-09	-
Unigene2347	122 1567 aspartyl protease family protein [Arabidopsis lyrata subsp. lyrata] >gi|297337916|gb|EFH68333.1| aspartyl protease family protein [Arabidopsis lyrata subsp. lyrata]		5	114	0.869			Unigene2347	comp30618_c0_seq1	4.42992	2.78e-06	+
CL3335.Contig2	111 1007 minus strand 5,10-methylenetetrahydrofolate dehydrogenase:5,10-methenyltetrahydrofolate cyclohydrolase, putative [Arabidopsis thaliana]		5	274	1.232			CL3335.Contig2	comp20707_c0_seq4	35.2845	1.7e-07	+
CL12043.Contig5	220 1317 minus strand mitochondrial phosphate transporter [Arabidopsis lyrata subsp. lyrata] >gi|297319482|gb|EFH49904.1| mitochondrial phosphate transporter [Arabidopsis lyrata subsp. lyrata]	CL12043.Contig6	6	232	1.023			CL12043.Contig5	comp28445_c0_seq4	-33.6306	0.000314086	-
CL634.Contig1	40 1428 predicted protein [Arabidopsis lyrata subsp. lyrata] >gi|297331490|gb|EFH61909.1| predicted protein [Arabidopsis lyrata subsp. lyrata]		4	163	0.681			CL634.Contig1	comp18122_c0_seq1	34.2952	1.78e-05	+
Unigene29699	87 632 disease resistance-responsive family protein [Arabidopsis lyrata subsp. lyrata] >gi|297333758|gb|EFH64176.1| disease resistance-responsive family protein [Arabidopsis lyrata subsp. lyrata]		3	131	0.81			Unigene29699	comp24457_c0_seq1	-4.35132	7.62e-07	-
CL2774.Contig1	216 821 dehydrin [Brassica juncea]		8	1005	1.234			CL2774.Contig1	comp30499_c1_seq2	36.2241	1.36e-09	+
CL3668.Contig1	150 1895 minus strand calcium-binding EF-hand domain-containing protein [Arabidopsis thaliana] >gi|332194787|gb|AEE32908.1| calcium-binding EF-hand domain-containing protein [Arabidopsis thaliana]		4	159	1.87			CL3668.Contig1	comp30989_c0_seq1	34.7915	1.86e-06	+
Unigene28919	136 1905 minus strand uncharacterized protein [Arabidopsis thaliana] >gi|332645044|gb|AEE78565.1| uncharacterized protein [Arabidopsis thaliana]		4	199	2.292			Unigene28919	comp27685_c0_seq7	-33.9211	9.18e-05	-
CL3491.Contig3	210 1553 aspartyl protease family protein [Arabidopsis thaliana] >gi|332003717|gb|AED91100.1| aspartyl protease family protein [Arabidopsis thaliana]		117	4707	0.496			CL3491.Contig3	comp32454_c0_seq1	10.0988	4.84e-17	+
CL5389.Contig2	173 2326 ATGCN4 [Arabidopsis lyrata subsp. lyrata] >gi|297322096|gb|EFH52517.1| ATGCN4 [Arabidopsis lyrata subsp. lyrata]		14	399	1.318			CL5389.Contig2	comp26604_c0_seq2	-33.5541	0.000381572	-
CL599.Contig1	98 2194 minus strand VHS domain-containing protein [Arabidopsis thaliana] >gi|75168952|sp|Q9C5H4.1|Y3627_ARATH RecName: Full=VHS domain-containing protein At3g16270 >gi|332642271|gb|AEE75792.1| VHS domain-containing protein [Arabidopsis thaliana	CL599.Contig2	3	117	1.149	*		CL599.Contig1	comp30596_c1_seq4	-34.8482	1.52e-06	-
CL2279.Contig2	2 796 60S ribosomal protein L3-2 [Arabidopsis thaliana] >gi|21542436|sp|P22738.4|RL32_ARATH RecName: Full=60S ribosomal protein L3-2 >gi|4585874|gb|AAD25547.1|AC005850_4 60s ribosomal protein L3 [Arabidopsis thaliana] >gi|332195738|gb|AEE33859.1|		6	102	1.918			CL2279.Contig2	comp23472_c0_seq1	-34.5036	8.07e-06	-
Unigene8836	2 187 minus strand metallothionein-like protein [Brassica rapa]		3	128	1.179			Unigene8836	comp20527_c0_seq1	4.97241	1.7e-08	+
CL8291.Contig4	3 992 lipase SIL1 [Brassica rapa subsp. pekinensis]		5	93	1.149			CL8291.Contig4	comp19151_c0_seq1	-5.66779	0.000101062	-
Unigene21307	80 1255 minus strand N-acetyl-gamma-glutamyl-phosphate reductase [Arabidopsis thaliana] >gi|240254483|ref|NP_849993.4| N-acetyl-gamma-glutamyl-phosphate reductase [Arabidopsis thaliana] >gi|334184607|ref|NP_180668.5| alpha/beta-hydrolase domain-		5	173	0.8			Unigene21307	comp27372_c0_seq2	34.0368	5.71e-05	+
CL3925.Contig1	62 223 minus strand translocase of chloroplast 132 [Arabidopsis thaliana] >gi|75206664|sp|Q9SLF3.1|TC132_ARATH RecName: Full=Translocase of chloroplast 132, chloroplastic; Short=AtToc132; AltName: Full=132 kDa chloroplast outer envelope protein		2	141	0.812			CL3925.Contig1	comp31689_c0_seq3	-33.7276	0.000216757	-
Unigene8469	5 1093 transducin family protein [Arabidopsis lyrata subsp. lyrata] >gi|297315850|gb|EFH46273.1| transducin family protein [Arabidopsis lyrata subsp. lyrata]		4	171	0.706			Unigene8469	comp25545_c3_seq1	6.07704	5.66e-06	+
CL2452.Contig2	208 1740 minus strand unnamed protein product [Thellungiella halophila]		4	107	1.029			CL2452.Contig2	comp30101_c0_seq2	-35.2686	1.97e-07	-
Unigene22308	1 492 hypothetical protein ARALYDRAFT_915472 [Arabidopsis lyrata subsp. lyrata] >gi|297314140|gb|EFH44563.1| hypothetical protein ARALYDRAFT_915472 [Arabidopsis lyrata subsp. lyrata]		3	152	0.906			Unigene22308	comp30941_c0_seq1	35.3266	1.45e-07	+
CL7364.Contig1	139 597 minus strand hypothetical protein ARALYDRAFT_476560 [Arabidopsis lyrata subsp. lyrata] >gi|297333373|gb|EFH63791.1| hypothetical protein ARALYDRAFT_476560 [Arabidopsis lyrata subsp. lyrata]	CL7364.Contig2 CL7364.Contig3	7	460	1.163			CL7364.Contig1	comp31746_c0_seq18	34.3939	1.2e-05	+
CL5990.Contig2	6 251 minus strand putative lectin [Arabidopsis thaliana]		5	174	0.793			CL5990.Contig2	comp29839_c0_seq2	35.5481	4.64e-08	+
CL1226.Contig2	128 1471 minus strand unnamed protein product [Thellungiella halophila]		3	1277	0.941			CL1226.Contig2	comp29327_c0_seq1	2.74785	0.000808581	+
CL1978.Contig4	53 607 minus strand expressed protein [Arabidopsis lyrata subsp. lyrata] >gi|297325417|gb|EFH55837.1| expressed protein [Arabidopsis lyrata subsp. lyrata]		2	69	0.521			CL1978.Contig4	comp27863_c0_seq2	-5.673	4.79e-05	-
CL13.Contig1	1 315 universal stress protein family protein [Brassica rapa]	CL13.Contig3	2	48	0.611			CL13.Contig1	comp31643_c0_seq3	-3.54296	3.1e-05	-
Unigene28114	53 2281 uncharacterized protein [Arabidopsis thaliana] >gi|30725324|gb|AAP37684.1| At3g01680 [Arabidopsis thaliana] >gi|307101698|gb|ADN32814.1| sieve element occlusion b [Arabidopsis thaliana] >gi|332640181|gb|AEE73702.1| uncharacterized protein		5	224	1.701			Unigene28114	comp30125_c0_seq1	3.41377	4.91e-05	+
Unigene25622	1 930 pectinesterase 35 [Arabidopsis thaliana] >gi|75311708|sp|Q9LYT5.1|PME35_ARATH RecName: Full=Probable pectinesterase/pectinesterase inhibitor 35; Includes: RecName: Full=Pectinesterase inhibitor 35; AltName: Full=Pectin methylesterase inhibi		3	183	0.425			Unigene25622	comp21486_c0_seq2	3.80749	0.000147179	+
Unigene27499	32 580 early nodulin-like protein 8 [Arabidopsis thaliana] >gi|45773786|gb|AAS76697.1| At1g64640 [Arabidopsis thaliana] >gi|46359847|gb|AAS88787.1| At1g64640 [Arabidopsis thaliana] >gi|332196147|gb|AEE34268.1| early nodulin-like protein 8 [Arabid		2	80	0.207			Unigene27499	comp27583_c0_seq1	4.01403	0.000496116	+
Unigene28576	4 432 minus strand uncharacterized protein [Arabidopsis thaliana] >gi|332007166|gb|AED94549.1| uncharacterized protein [Arabidopsis thaliana]		5	96	1.214			Unigene28576	comp31176_c0_seq24	-35.35	1.35e-07	-
CL9246.Contig2	1 1125 minus strand subtilase family protein [Arabidopsis lyrata subsp. lyrata] >gi|297313717|gb|EFH44140.1| subtilase family protein [Arabidopsis lyrata subsp. lyrata]		4	102	0.569			CL9246.Contig2	comp31442_c0_seq1	5.72238	9.56e-07	+
CL9005.Contig4	95 346 minus strand expressed protein [Arabidopsis lyrata subsp. lyrata] >gi|297335756|gb|EFH66173.1| expressed protein [Arabidopsis lyrata subsp. lyrata]		3	180	1.156			CL9005.Contig4	comp14185_c0_seq1	4.90016	3.08e-06	+
Unigene29629	79 474 minus strand putative phospho-ser/thr phosphatase [Arabidopsis thaliana] >gi|7270178|emb|CAB77793.1| putative phospho-ser/thr phosphatase [Arabidopsis thaliana]		2	69	0.904			Unigene29629	comp29105_c0_seq2	33.3809	0.000705527	+
CL6100.Contig2	259 1728 minus strand phosphoethanolamine N-methyltransferase [Brassica napus]		3	92	1.254			CL6100.Contig2	comp22789_c0_seq1	3.68094	0.000104431	+
CL9005.Contig2	5 373 minus strand expressed protein [Arabidopsis lyrata subsp. lyrata] >gi|297335756|gb|EFH66173.1| expressed protein [Arabidopsis lyrata subsp. lyrata]		4	160	0.866			CL9005.Contig2	comp14872_c0_seq1	3.55519	7.24e-05	+
CL14527.Contig3	1 1017 minus strand hypothetical protein ARALYDRAFT_902809 [Arabidopsis lyrata subsp. lyrata] >gi|297327315|gb|EFH57735.1| hypothetical protein ARALYDRAFT_902809 [Arabidopsis lyrata subsp. lyrata]		4	637	0.917			CL14527.Contig3	comp29605_c0_seq1	3.37456	6.17e-05	+
Unigene2940	143 1153 minus strand nuclear pore complex protein Nup53 [Arabidopsis thaliana] >gi|332642275|gb|AEE75796.1| nuclear pore complex protein Nup53 [Arabidopsis thaliana]		9	479	0.991			Unigene2940	comp27880_c0_seq2	34.6287	3.92e-06	+
CL7823.Contig2	140 478 PREDICTED: chaperonin CPN60-2, mitochondrial isoform 1 [Vitis vinifera] >gi|297741894|emb|CBI33329.3| unnamed protein product [Vitis vinifera]		5	130	0.737			CL7823.Contig2	comp29187_c0_seq2	3.58684	0.000240386	+
CL1095.Contig1	452 1381 minus strand hypothetical protein ARALYDRAFT_491566 [Arabidopsis lyrata subsp. lyrata] >gi|297313117|gb|EFH43540.1| hypothetical protein ARALYDRAFT_491566 [Arabidopsis lyrata subsp. lyrata]	CL1095.Contig3 CL1095.Contig4 CL1095.Contig5 CL1095.Contig6 CL1095.Contig7 CL1095.Contig8 CL1095.Contig9	5	146	0.726			CL1095.Contig1	comp31460_c3_seq7	34.5688	4.94e-06	+
CL1840.Contig1	163 606 minus strand ubiquitin-conjugating enzyme E2 11 [Arabidopsis thaliana] >gi|334185174|ref|NP_001189841.1| ubiquitin-conjugating enzyme E2 11 [Arabidopsis thaliana] >gi|297829396|ref|XP_002882580.1| ubiquitin-conjugating enzyme 11 [Arabido		2	35	0.975			CL1840.Contig1	comp19081_c0_seq2	-33.4662	0.000570552	-
CL7579.Contig1	80 232 minus strand acyl-CoA synthetase [Brassica napus]	CL7579.Contig2 Unigene21330	2	39	1.163			CL7579.Contig1	comp27382_c0_seq1	-6.31688	1.47e-07	-
Unigene27308	129 1187 minus strand peroxidase 34 [Arabidopsis thaliana] >gi|25453220|sp|Q9SMU8.1|PER34_ARATH RecName: Full=Peroxidase 34; Short=Atperox P34; AltName: Full=ATPCb; Flags: Precursor >gi|16930431|gb|AAL31901.1|AF419569_1 AT3g49120/T2J13_40 [Arabi		2	186	0.097			Unigene27308	comp18969_c1_seq1	-5.33963	1.22e-08	-
CL14118.Contig1	10 2400 minus strand DNA topoisomerase 2-associated protein PAT1 [Arabidopsis thaliana] >gi|30699394|ref|NP_849904.1| DNA topoisomerase 2-associated protein PAT1 [Arabidopsis thaliana] >gi|227202670|dbj|BAH56808.1| AT1G79090 [Arabidopsis thalian	CL14118.Contig2	3	76	0.847			CL14118.Contig1	comp31174_c0_seq4	35.4052	9.33e-08	+
CL647.Contig2	243 2111 minus strand ATEXO70H7 [Arabidopsis lyrata subsp. lyrata] >gi|297312179|gb|EFH42603.1| ATEXO70H7 [Arabidopsis lyrata subsp. lyrata]	CL647.Contig3	4	45	1.157			CL647.Contig2	comp12676_c0_seq1	-3.77604	0.000170354	-
CL4301.Contig1	230 1939 minus strand FAD-binding domain-containing protein [Arabidopsis lyrata subsp. lyrata] >gi|297315760|gb|EFH46183.1| FAD-binding domain-containing protein [Arabidopsis lyrata subsp. lyrata]	CL4301.Contig3	6	157	1.046			CL4301.Contig1	comp26108_c0_seq1	-2.93911	0.000495339	-
CL826.Contig1	141 908 minus strand fasciclin-like arabinogalactan protein 7 [Arabidopsis thaliana] >gi|30678131|ref|NP_849935.1| fasciclin-like arabinogalactan protein 7 [Arabidopsis thaliana] >gi|38257788|sp|Q9SJ81.1|FLA7_ARATH RecName: Full=Fasciclin-like a	CL826.Contig2	21	599	1.063			CL826.Contig1	comp12764_c0_seq1	4.20587	1.1e-06	+
CL8788.Contig1	126 1409 hypothetical protein ARALYDRAFT_328390 [Arabidopsis lyrata subsp. lyrata] >gi|297313011|gb|EFH43434.1| hypothetical protein ARALYDRAFT_328390 [Arabidopsis lyrata subsp. lyrata]		2	69	1.073			CL8788.Contig1	comp25950_c0_seq1	33.3221	0.000872686	+
CL961.Contig1	113 406 minus strand unnamed protein product [Thellungiella halophila]	CL961.Contig2	2	156	0.79			CL961.Contig1	comp23526_c0_seq1	33.6139	0.000314086	+
Unigene26821	103 1374 minus strand hypothetical protein ARALYDRAFT_495659 [Arabidopsis lyrata subsp. lyrata] >gi|297311945|gb|EFH42369.1| hypothetical protein ARALYDRAFT_495659 [Arabidopsis lyrata subsp. lyrata]		11	388	0.897	*		Unigene26821	comp30632_c2_seq1	3.76706	1.46e-05	+
CL180.Contig1	3 3536 hypothetical protein 26.t00005 [Brassica oleracea]		2	80	1.139			CL180.Contig1	comp32128_c0_seq14	34.7718	2.04e-06	+
CL2532.Contig1	209 691 AT5G10020-like protein [Arabidopsis arenosa]		3	110	0.623			CL2532.Contig1	comp31681_c0_seq2	33.6473	0.000260482	+
CL9948.Contig1	89 946 minus strand cold shock domain protein 3 [Eutrema salsugineum]	CL9948.Contig2	3	69	1.119			CL9948.Contig1	comp29170_c0_seq21	3.23188	0.000537953	+
CL14052.Contig1	103 2055 minus strand hypothetical protein ARALYDRAFT_888760 [Arabidopsis lyrata subsp. lyrata] >gi|297338621|gb|EFH69038.1| hypothetical protein ARALYDRAFT_888760 [Arabidopsis lyrata subsp. lyrata]		3	93	1.17			CL14052.Contig1	comp27354_c1_seq1	33.7757	0.000152415	+
CL1804.Contig4	93 1868 minus strand pectinesterase 3 [Arabidopsis thaliana] >gi|229891485|sp|O49006.2|PME3_ARATH RecName: Full=Pectinesterase/pectinesterase inhibitor 3; Includes: RecName: Full=Pectinesterase inhibitor 3; AltName: Full=Pectin methylesterase in		3	195	1.08			CL1804.Contig4	comp29508_c0_seq1	5.08841	6.21e-08	+
CL3039.Contig1	1 2127 minus strand hypothetical protein ARALYDRAFT_489250 [Arabidopsis lyrata subsp. lyrata] >gi|297317918|gb|EFH48340.1| hypothetical protein ARALYDRAFT_489250 [Arabidopsis lyrata subsp. lyrata]		10	363	1.07			CL3039.Contig1	comp30419_c0_seq2	34.2047	2.66e-05	+
Unigene1217	2 523 minus strand AT4G20890 [Arabidopsis thaliana]		4	528	1.282			Unigene1217	comp29840_c1_seq1	34.4587	9.17e-06	+
CL4954.Contig3	210 536 minus strand copper chaperone [Arabidopsis thaliana] >gi|13605758|gb|AAK32872.1|AF361860_1 AT3g56240/F18O21_200 [Arabidopsis thaliana] >gi|3168840|gb|AAC33510.1| copper homeostasis factor [Arabidopsis thaliana] >gi|7572922|emb|CAB87423.1		5	335	1.063			CL4954.Contig3	comp26248_c0_seq2	3.66229	1.32e-05	+
CL43.Contig1	6 734 minus strand hypothetical protein ARALYDRAFT_481640 [Arabidopsis lyrata subsp. lyrata] >gi|297326752|gb|EFH57172.1| hypothetical protein ARALYDRAFT_481640 [Arabidopsis lyrata subsp. lyrata]	CL43.Contig2	2	92	1.556			CL43.Contig1	comp23623_c0_seq1	-3.74441	5.66e-05	-
CL7418.Contig1	66 368 unnamed protein product [Thellungiella halophila]	CL7418.Contig2	3	61	1.081			CL7418.Contig1	comp25190_c0_seq1	4.49208	1.65e-06	+
CL6529.Contig1	184 486 phytocystatin [Brassica rapa subsp. pekinensis]	CL6529.Contig2 CL6529.Contig3	3	125	0.626			CL6529.Contig1	comp23227_c0_seq1	6.29093	1.22e-10	+
CL9630.Contig3	198 1385 minus strand hypothetical protein ARALYDRAFT_497154 [Arabidopsis lyrata subsp. lyrata] >gi|297309151|gb|EFH39576.1| hypothetical protein ARALYDRAFT_497154 [Arabidopsis lyrata subsp. lyrata]		30	715	1.009			CL9630.Contig3	comp30812_c0_seq4	34.5821	4.94e-06	+
CL3438.Contig1	82 1566 minus strand Pectin lyase-like protein [Arabidopsis thaliana] >gi|332190491|gb|AEE28612.1| Pectin lyase-like protein [Arabidopsis thaliana]		2	109	0.69			CL3438.Contig1	comp30956_c0_seq3	3.99045	2.82e-05	+
CL1301.Contig1	173 1273 minus strand peptidoglycan-binding LysM domain-containing protein [Arabidopsis lyrata subsp. lyrata] >gi|297329880|gb|EFH60299.1| peptidoglycan-binding LysM domain-containing protein [Arabidopsis lyrata subsp. lyrata]	CL1301.Contig2	13	528	0.926			CL1301.Contig1	comp23065_c0_seq1	-3.94104	3.16e-06	-
CL5403.Contig1	174 497 40S ribosomal protein S25-4 [Arabidopsis thaliana] >gi|30580493|sp|Q9T029.1|RS254_ARATH RecName: Full=40S ribosomal protein S25-4 >gi|4914432|emb|CAB43635.1| ribosomal protein S25 [Arabidopsis thaliana] >gi|7270903|emb|CAB80583.1| ribosom	CL5403.Contig2	8	111	1.107			CL5403.Contig1	comp28824_c0_seq4	-33.7914	0.000152415	-
CL11309.Contig1	109 810 minus strand hypothetical protein ARALYDRAFT_478699 [Arabidopsis lyrata subsp. lyrata] >gi|297328648|gb|EFH59067.1| hypothetical protein ARALYDRAFT_478699 [Arabidopsis lyrata subsp. lyrata]	CL11309.Contig2 CL11309.Contig3	2	59	0.565			CL11309.Contig1	comp27386_c0_seq1	-34.6484	3.92e-06	-
CL967.Contig1	2 835 minus strand hypothetical protein ARALYDRAFT_488655 [Arabidopsis lyrata subsp. lyrata] >gi|297317623|gb|EFH48045.1| hypothetical protein ARALYDRAFT_488655 [Arabidopsis lyrata subsp. lyrata]		2	54	0.747			CL967.Contig1	comp30220_c0_seq2	-34.8246	1.68e-06	-
CL9925.Contig2	35 925 minus strand xyloglucan:xyloglucosyl transferase [Arabidopsis thaliana] >gi|38605514|sp|Q9SJL9.1|XTH32_ARATH RecName: Full=Probable xyloglucan endotransglucosylase/hydrolase protein 32; Short=At-XTH32; Short=XTH-32; Flags: Precursor >gi|3		7	153	0.695			CL9925.Contig2	comp30321_c0_seq2	5.02813	0.000166965	+
CL13057.Contig2	26 1894 minus strand VHA-A [Arabidopsis lyrata subsp. lyrata] >gi|297333601|gb|EFH64019.1| VHA-A [Arabidopsis lyrata subsp. lyrata]	CL13057.Contig3	101	3533	1.151			CL13057.Contig2	comp32158_c0_seq11	35.1649	3.17e-07	+
CL4537.Contig3	240 1058 hypothetical protein ARALYDRAFT_913787 [Arabidopsis lyrata subsp. lyrata] >gi|297313335|gb|EFH43758.1| hypothetical protein ARALYDRAFT_913787 [Arabidopsis lyrata subsp. lyrata]		32	1066	1.032			CL4537.Contig3	comp29293_c1_seq4	-3.36604	0.000122091	-
Unigene13874	193 1008 minus strand receptor like protein 46 [Arabidopsis thaliana] >gi|332656975|gb|AEE82375.1| receptor like protein 46 [Arabidopsis thaliana]		2	87	0.778			Unigene13874	comp48683_c0_seq1	-4.56591	0.0005028	-
